# Supplementary material for: Dynamic regulation of mRNA acetylation at synapses by spatial memory in mouse hippocampus
Source: eLife. 2026 Mar 23;14:RP108995. doi: 10.7554/eLife.108995 (PMC13008358; doi:10.7554/eLife.108995)
Supplement: Supplementary file 1. [file elife-108995-supp1.xlsx]

## Sheet: Table A
S1. Library Information of acRIP-seq
	Sample	Raw Reads	Clean Reads	Clean Ratio	Q30
	SYN-C day 1 Input	45690962	45690826	0.9999	0.9599
	SYN-C day 1 acRIP	34615480	34571324	0.9987	0.9483
	SYN-L day 1 Input	40986700	40986580	0.9999	0.9593
	SYN-L day 1 acRIP	35261962	35224988	0.999	0.9547
	SYN-C day 6 Input	50883680	50881302	0.9999	0.9141
	SYN-C day 6 acRIP	42875438	42849170	0.9994	0.885
	SYN-L day 6 Input	44352804	44352528	0.9999	0.9143
	SYN-L day 6 acRIP	42896374	42844138	0.9988	0.8985
	SYN-C day 20 Input	39245704	39245602	0.9999	0.9567
	SYN-C day 20 acRIP	33114714	33074726	0.9988	0.951
	SYN-L day 20 Input	37775538	37775450	0.9999	0.9608
	SYN-L day 20 acRIP	31993250	31956866	0.9989	0.9519
	HOM-C1 day 6 Input	57375292	57372228	0.9999	0.903
	HOM-C1 day 6 acRIP	49838558	49825568	0.9997	0.9062
	HOM-L1 day 6 Input	35703564	35702984	0.9999	0.9098
	HOM-L1 day 6 acRIP	45501964	45493556	0.9998	0.9058
	HOM-C2 day 6 Input	46847176	46846652	0.9999	0.9305
	HOM-C2 day 6 acRIP	38929266	38542586	0.9901	0.9087
	HOM-L2 day 6 Input	48653096	48652438	0.9999	0.9247
	HOM-L2 day 6 acRIP	42074246	41950824	0.9971	0.8816
	HOM-C3 day 6 Input	56203128	56200176	0.9999	0.9144
	HOM-C3 day 6 acRIP	36085478	36082128	0.9999	0.9063
	HOM-L3 day 6 Input	55139518	55138732	0.9999	0.9153
	HOM-L3 day 6 acRIP	35343596	35329016	0.9996	0.8995
	SYN-Ctrl Input	47494076	47485678	0.9998	0.9044
	SYN-Ctrl acRIP	36251162	34147224	0.942	0.916
	SYN-Nat10 cKO Input	46660788	46652010	0.9998	0.9042
	SYN-Nat10 cKO acRIP	60886340	40185916	0.66	0.8665

## Sheet: Table B
S2. List of ac4C mRNAs identified by regular acRIP-seq (HOM)								S2. List of mRNAs identified by regular acRIP-seq (HOM)
Control (ac4C mRNA)			Learning (ac4C mRNA)				Control (mRNA)						Learning (mRNA)
Rep 1	Rep 2	Rep 3	Rep 1	Rep 2	Rep 3		Rep 1_genename	Rep 1_normalized count	Rep 2_genename	Rep 2_normalized count	Rep 3_genename	Rep 3_normalized count	Rep 1_genename	Rep 1_normalized count	Rep 2_genename	Rep 2_normalized count	Rep 3_genename	Rep 3_normalized count
Xkr4	Xkr4	Xkr4	Xkr4	Xkr4	Xkr4		Hpx	-1.14645	Hp	-0.496109	Hpx	-0.776528	Mug1	6.88225	Igfbp1	-0.733835	Ces1d	0.739043
Tcea1	Lypla1	Sox17	Tcea1	Tcea1	Sox17		Hp	-0.967114	C3	2.01667	Apoa2	-1.0709	Apob	9.21578	Apoh	-0.733835	Aplnr	0.65471
Rgs20	Tcea1	Mrpl15	Rgs20	Rgs20	Mrpl15		Apoa2	-1.59009	Apoc1	-0.862263	C3	0.477048	Apoa1	6.34029	Mettl7b	-1.40722	Apoa2	-1.54663
Rb1cc1	Rgs20	Tcea1	Atp6v1h	Rb1cc1	Tcea1		C3	1.38088	Rgn	-0.496109	Apoc1	-1.66935	Saa1	5.54538	Hp	-0.925363	C3	1.22185
Pcmtd1	Rb1cc1	Rgs20	Rb1cc1	St18	Atp6v1h		Apoc1	-0.807626	Fbp1	-1.08735	Slco1b2	0.095781	Mat1a	7.23919	Pydc3	0.509557	4933403O08Rik	-0.293092
Rrs1	St18	Rb1cc1	Pcmtd1	Pcmtd1	Rb1cc1		Rgn	-1.14645	Sftpc	0.145787	Car3	0.234371	Itih4	6.43964	Soat2	-0.151482	Apoc1	-1.19404
Vxn	Pcmtd1	St18	Rrs1	Sntg1	St18		Slco1b2	0.366069	Pnlip	-1.08735	Sftpc	-1.24419	Cfi	4.03631	Slco6c1	0.169401	Gm3373	-0.471164
Cspp1	Rrs1	Pcmtd1	Vxn	Rrs1	Sntg1		Gnmt	-1.14645	Aldob	1.09718	Pnlip	-1.24419	Amy2a3	3.43732	C3	0.904692	S100a6	-0.674351
Arfgef1	Vxn	Rrs1	Vcpip1	Vxn	Rrs1		Sftpc	-0.967114	Uox	0.145787	Fetub	-0.916221	Gm5096	3.27662	Slc22a1	-0.151482	Foxs1	-0.674351
A830018L16Rik	Cspp1	Adhfe1	Cspp1	Mybl1	Vxn		Pnlip	-0.413692	Baat	-0.342854	AI182371	-0.323246	Bhmt	7.21591	Tmem254c	-0.733835	Gm21028	-0.471164
Prdm14	Arfgef1	Vxn	Arfgef1	Arfgef1	Mybl1		Aldob	1.00457	Lrg1	-0.862263	Aldob	0.866229	Fgg	7.40045	Cyp2d26	0.070164	2024-03-01	-0.471164
Ncoa2	Sulf1	Mybl1	A830018L16Rik	Prex2	Vcpip1		Uox	0.225584	Ttc36	-1.35416	Mageb16	-0.776528	G6pc	2.55143	Ccl11	-0.413472	2610028H24Rik	-0.471164
Tram1	Prdm14	Vcpip1	Sulf1	A830018L16Rik	Cops5		Lrg1	-1.14645	Slc38a4	0.339436	Lrg1	-1.0709	Igfbp1	2.44868	Klrc1	-0.413472	Car3	0.739043
Kcnb2	Ncoa2	Cspp1	Prdm14	Sulf1	Cspp1		Slc27a5	-0.664027	Cml2	-0.204327	Slc27a5	-0.532158	Apoh	4.84297	1110017D15Rik	0.262249	Ube2u	-0.910921
Terf1	Tram1	Prex2	Ncoa2	Prdm14	Arfgef1		Adh1	-0.664027	Gvin1	0.926736	Adh1	0.095781	F10	2.37587	4933403O08Rik	-0.733835	Gm17606	-2.01427
Stau2	Lactb2	Sulf1	Kcnb2	Ncoa2	Prex2		Ttc36	-1.59009	Inmt	-0.342854	Slc38a4	0.988787	Hsd17b13	2.19722	2900092C05Rik	-0.151482	Ccr9	0.008183
Eloc	Kcnb2	Prdm14	Terf1	Tram1	Sulf1		Slc38a4	0.960925	Gm9869	-2.10635	Ctrl	-0.916221	Mettl7b	2.13239	Gm3373	-0.733835	Ankrd65	-0.910921
Ly96	Terf1	Ncoa2	4930444P10Rik	Eya1	Prdm14		Cml2	-0.104575	Ttpa	2.6488	Ttpa	2.69067	Cela2a	2.01742	S1pr4	-0.733835	Stmnd1	-0.134605
Jph1	Stau2	Tram1	Stau2	Kcnb2	Tram1		Inmt	-0.664027	Iigp1	2.22719	Iigp1	1.27233	Agxt2	1.86615	S100a6	-0.733835	1700111E14Rik	-1.54663
Paqr8	Eloc	Kcnb2	Eloc	Terf1	Eya1		Ctrl	-1.14645	Rnase1	-0.204327	Tdo2	2.57803	Tfpi2	1.89249	Aldoart2	-0.036407	Sftpc	-0.910921
Khdc1b	Jph1	Terf1	Jph1	Stau2	Kcnb2		Ttpa	2.78855	Tdo2	2.8844	Gsta3	1.02743	Cps1	7.25957	Klk1b5	-0.151482	Fgf22	-1.54663
Kcnq5	Paqr8	4930444P10Rik	Paqr8	Eloc	Terf1		Iigp1	1.38088	Gsta3	0.51014	Gm11111	-2.27477	Cyp8b1	1.72671	Foxs1	-1.14627	Plek2	0.257282
Rims1	Khdc1b	Stau2	Khdc1b	Jph1	Rdh10		Rnase1	-1.35129	Ifi47	-0.342854	Cbr2	-0.916221	Hal	3.4551	Ugt1a2	-0.733835	Hsh2d	-0.910921
Ogfrl1	Kcnq5	Eloc	Kcnq5	Paqr8	Stau2		Tdo2	2.65797	Cd1d1	0.145787	Pipox	-0.323246	Tat	5.55572	Fgf3	-0.413472	AI182371	-0.134605
B3gat2	Rims1	Tmem70	Rims1	Khdc1b	Eloc		Gsta3	1.0881	Cyp2a5	-0.667601	Spsb2	-1.0709	Hp	6.43964	Dnmt3l	-0.276538	Aldob	0.56514
Smap1	Ogfrl1	Jph1	Ogfrl1	Kcnq5	Jph1		Cyp2a5	-0.664027	Fam159b	-1.08735	Rbp4	2.29094	Slc2a2	3.84051	Gm21028	-1.40722	Prss22	-1.19404
Fam135a	B3gat2	Paqr8	B3gat2	Rims1	Gdap1		Gm11111	-2.23403	Rsad2	0.245858	Crabp1	-1.66935	Prodh2	1.28483	Il2	-0.733835	Insl3	-1.19404
Adgrb3	Smap1	Tram2	Smap1	Ogfrl1	Paqr8		Cbr2	-1.14645	Rbp4	0.985817	Cyp3a13	-0.532158	Amy2a4	1.28483	Mogat1	-0.413472	1700023E05Rik	0.008183
Phf3	Fam135a	Khdc1b	Sdhaf4	B3gat2	Kcnq5		Rbp4	1.99259	Tgtp2	0.038255	Asgr1	-0.532158	Ces1d	3.46391	Gm766	-0.413472	Uox	0.56514
Khdrbs2	Lmbrd1	Kcnq5	Fam135a	Smap1	Rims1		Tgtp2	-0.533436	Cyp3a13	1.34294	Mgst1	3.03212	Apoa2	5.41291	Chi3l7	-0.413472	Mageb16	-0.471164
Rab23	Adgrb3	Rims1	Lmbrd1	Fam135a	Ogfrl1		Cyp3a13	0.149854	Mgst1	3.27626	Akr1c14	1.23979	Fgl1	5.26199	Oas1g	-0.413472	Gal	-1.54663
Bag2	Phf3	Ogfrl1	Gm20172	Adgrb3	Smap1		Asgr1	-0.533436	Ifi204	-0.204327	Fsip1	-0.229138	Apof	2.46632	Gm1647	-0.733835	Hyal3	-0.293092
Dst	Khdrbs2	B3gat2	Adgrb3	Phf3	Sdhaf4		Mgst1	3.31597	Slc3a1	-0.204327	Ang	-0.057551	Hc	5.50754	Gypa	0.784617	Baat	-0.910921
Imp4	Prim2	Smap1	Phf3	Khdrbs2	Fam135a		Slc3a1	-0.533436	Akr1c14	0.865132	4930556J24Rik	-1.24419	Soat2	-0.535069	Stmnd1	-0.036407	Gpr50	-0.471164
Amer3	Rab23	Sdhaf4	Khdrbs2	Rab23	Col9a1		Akr1c14	1.27793	Olfr574	-1.35416	1600029I14Rik	-0.916221	Aldh1a7	2.04116	Agrp	-1.14627	Lrg1	-0.910921
Arhgef4	Bend6	Fam135a	Rab23	Bend6	Lmbrd1		Gm2026	-0.303129	Ifi44	0.926736	1700003F12Rik	-1.0709	Ankle1	0.2957	F830016B08Rik	0.509557	Misp	-0.471164
Fam168b	Dst	Col9a1	Bend6	Dst	Gm20172		Ang	-0.413692	Creb3l3	-0.496109	Bst2	-0.140795	C3	8.29879	Gm4951	0.653632	Isg15	0.008183
Hs6st1	Ccdc115	Lmbrd1	Dst	Amer3	Adgrb3		4930556J24Rik	-1.35129	Gm2026	-0.204327	Gm10068	-1.24419	Slc6a14	0.214512	Trim34b	-0.925363	Slc27a5	-0.134605
Uggt1	Imp4	Gm20172	Imp4	Arhgef4	Phf3		Bst2	0.225584	Ang	-1.08735	Cabyr	0.234371	Slc22a1	1.66693	Pnlip	0.583392	Dhx16	-0.134605
Arid5a	Amer3	Adgrb3	Amer3	Fam168b	Khdrbs2		Gm10020	-1.87643	Morn3	-0.342854	Gm6104	-1.0709	Tmem254c	-0.535069	Fgf22	-1.40722	Npb	-1.54663
Kansl3	Arhgef4	Phf3	Arhgef4	Hs6st1	Prim2		Gm10068	-1.14645	Bst2	0.51014	Fmo2	0.420097	Cyp2d26	3.41932	Qprt	-0.276538	Gm7367	-2.01427
Lman2l	Fam168b	Khdrbs2	Fam168b	Uggt1	Rab23		Cabyr	-0.664027	Gm10020	-1.68178	Cela1	0.095781	Pon1	4.21912	Spem1	-1.14627	Gchfr	-1.54663
Cnnm3	Hs6st1	Rab23	Plekhb2	Arid5a	Bag2		Gm6104	-1.87643	Gm10068	-1.68178	Ifit1	1.2065	Ccl11	-0.535069	Klk9	-1.14627	Gm5459	-1.54663
Ankrd23	Uggt1	Bag2	Hs6st1	Lman2l	Bend6		Fmo2	1.0881	Dpys	-0.496109	C8g	-0.532158	Klrc1	-0.535069	Gm5819	0.070164	Slc38a4	0.008183
Ankrd39	Arid5a	Dst	Uggt1	Cnnm4	Dst		Cela1	0.431493	Gm6104	-1.68178	Gm6665	-1.94053	4932442L08Rik	-0.401072	AI182371	-0.036407	A730071L15Rik	-1.19404
Sema4c	Lman2l	Imp4	Arid5a	Cnnm3	Ccdc115		Ifit1	1.41363	Fmo2	2.41086	Esm1	-0.776528	Gm4952	2.55143	Zbp1	0.583392	Gm5616	-2.01427
Zap70	Cnnm4	Amer3	Kansl3	Ankrd23	Imp4		Gm6665	-2.23403	Cela1	0.733423	Rarres1	-0.776528	Apoc1	5.23651	Aldob	1.58182	Gvin1	4.2124
Tmem131	Cnnm3	Arhgef4	Lman2l	Sema4c	Ptpn18		Ccdc113	-1.35129	Ifit1	1.89865	Ccdc113	-0.057551	Serpinc1	4.9503	Lao1	0.784617	Treh	-0.674351
Cnga3	Ankrd23	Fam168b	Cnnm3	Cox5b	Prss39		Ccl17	-1.59009	Gm4070	0.926736	Ccl17	-1.66935	2900092C05Rik	-1.24657	Serpinf2	-0.733835	Mesp2	-0.910921
Inpp4a	Sema4c	Plekhb2	Ankrd23	Actr1b	Amer3		Sbspon	-0.413692	Ccdc113	-0.204327	Hs3st3b1	0.166739	Proz	2.29918	Gimap9	-0.276538	Arl9	-0.293092
Coa5	Cox5b	Hs6st1	Ankrd39	Zap70	Arhgef4		Steap4	0.069928	H2-Ab1	-1.08735	Steap4	1.02743	Crtam	-0.401072	Gucy2c	0.262249	Rbp7	-1.19404
Mgat4a	Actr1b	Uggt1	Sema4c	Tmem131	Fam168b		Atf3	-0.664027	Sbspon	-0.342854	Atf3	-0.649175	1300017J02Rik	3.08437	Plac8	-0.564779	Dmgdh	-0.293092
Cracdl	Zap70	Lman2l	Cox5b	Inpp4a	Plekhb2		Trim30a	1.34737	Gm5900	-1.35416	Dnd1	-0.649175	Nr5a2	2.23887	1700030K09Rik	-0.151482	Npffr2	-0.910921
Mrpl30	Tmem131	Cnnm4	Actr1b	Coa5	Hs6st1		1700119I11Rik	-1.87643	Steap4	-0.342854	Trim30a	1.63964	Serpina10	2.72269	Uox	0.070164	Gm12500	-0.674351
Eif5b	Vwa3b	Cnnm3	Zap70	Mgat4a	Lman2l		Tlcd2	-0.413692	Aadat	-0.496109	1700119I11Rik	-1.66935	Rgn	4.53555	Gm6034	0.070164	Slc45a3	0.89422
Rev1	Inpp4a	Ankrd23	Tmem131	2010300C02Rik	Cnnm3		Olfr1033	-1.59009	Olfr1507	-1.08735	Trat1	-1.66935	Il2	-1.24657	Gal	0.653632	Gm10912	-0.910921
Aff3	Coa5	Ankrd39	Inpp4a	Mitd1	Ankrd39		A230083G16Rik	-1.14645	Trim30a	0.985817	Tlcd2	-0.057551	Gfra3	-0.847396	Hyal3	0.169401	Inmt	0.965968
Lonrf2	Mgat4a	Sema4c	Coa5	Eif5b	Sema4c		Cox7b2	-1.87643	1700119I11Rik	-2.10635	Rps18-ps3	-1.94053	2024-03-01	2.23887	Prss45	-0.151482	Lrat	0.367364
Chst10	2010300C02Rik	Cox5b	Unc50	Rev1	Cox5b		Slc27a2	2.45268	Gm20661	-0.496109	A230083G16Rik	-1.44116	Pcp2	-0.847396	Misp	0.653632	Ctrl	-1.54663
Pdcl3	Mrpl30	Actr1b	Mgat4a	Aff3	Actr1b		Rep15	-0.807626	C8b	-0.342854	Cox7b2	-1.0709	Iqcf5	-0.535069	Vnn1	-0.276538	Asb4	2.01374
Npas2	Txndc9	Zap70	Cracdl	Lonrf2	Zap70		Dbil5	-1.87643	Rps18-ps3	-2.10635	Ccdc121	-0.649175	Slco1b2	6.05709	Isg15	-0.276538	Il2rg	-0.134605
Rpl31	Eif5b	Tmem131	Mitd1	Chst10	Tmem131		1700001P01Rik	-1.59009	C030005K15Rik	-0.077944	Slc27a2	2.52501	Gm13235	-0.847396	Slc27a5	0.431738	Gm14308	0.257282
Cnot11	Rev1	Inpp4a	Eif5b	Pdcl3	Vwa3b		Gm14434	1.44565	Olfr1033	-0.862263	Rep15	-0.916221	Pbp2	-1.24657	6820408C15Rik	-0.733835	Ttpa	2.23317
Rnf149	Aff3	Coa5	Rev1	Npas2	Inpp4a		Grrp1	-0.807626	A230083G16Rik	-1.08735	Dbil5	-1.44116	Gm1647	-1.80033	Nipal1	0.070164	Ssmem1	-0.293092
Creg2	Lonrf2	Mgat4a	Aff3	Rpl31	Coa5		Lmx1a	-0.200439	C1rl	-0.342854	D830039M14Rik	-0.916221	Fbp1	3.35448	Gm7367	-1.14627	Gm5493	-0.471164
Map4k4	Chst10	2010300C02Rik	Chst10	Cnot11	Mgat4a		Gm9825	-1.35129	Cox7b2	-1.68178	1700001P01Rik	-1.44116	Car3	4.99656	Slc38a4	1.46947	D630039A03Rik	1.53658
Il1r2	Pdcl3	Mitd1	Pdcl3	Rnf149	2010300C02Rik		Ccdc89	-0.533436	Ccdc121	-0.342854	Gm14434	0.477048	Foxa3	-0.682797	A730071L15Rik	-0.564779	Iigp1	2.1119
Slc9a4	Npas2	Txndc9	Npas2	Creg2	Tsga10		Jmjd6	0.149854	Slc27a2	2.01667	Grrp1	-0.423924	Gnmt	3.54916	1700016C15Rik	-1.72603	Rnase1	-0.674351
Slc9a2	Rpl31	Eif5b	Rpl31	Map4k4	Mitd1		Gm9804	-0.533436	Mb	-0.496109	Ccdc89	-0.423924	Lcn2	4.09419	Pla2g4f	-0.413472	Tdo2	2.31787
Pou3f3	Cnot11	Rev1	Cnot11	Il1r2	Txndc9		Gm9905	-0.807626	Plin4	0.339436	Jmjd6	1.06507	Gm17606	-0.847396	Gm5616	-2.13589	Gsta3	1.09957
Mrps9	Rnf149	Aff3	Rnf149	Slc9a2	Eif5b		Parp3	-0.104575	1700001P01Rik	-1.68178	Gm9804	-0.649175	E030018B13Rik	-0.847396	Efcab3	-0.151482	Oas1a	0.367364
Tgfbrap1	Creg2	Lonrf2	Creg2	Pou3f3	Rev1		Sptlc3	-0.104575	Grrp1	-1.35416	Hpse	-0.323246	F9	3.54086	Timd4	-0.733835	Tcp11	-0.471164
AI597479	Map4k4	Chst10	Map4k4	Tgfbrap1	Aff3		Nat8	-0.967114	Lmx1a	0.926736	Gm9905	0.166739	Apom	1.36225	Gvin1	3.28117	Mslnl	-0.674351
Fhl2	Il1r2	Pdcl3	Il1r2	AI597479	Lonrf2		Gprc5a	-0.807626	Gm9825	-0.496109	Stard3	-0.323246	1700111E14Rik	-1.24657	Mesp2	-0.733835	Gm9755	-0.471164
Nck2	Slc9a2	Npas2	Slc9a2	Nck2	Chst10		Cth	1.27793	Tmprss6	-0.342854	Parp3	0.095781	F830016B08Rik	2.13239	Gm853	0.262249	Snai1	-0.134605
Tpp2	Pou3f3	Rpl31	Pou3f3	Tpp2	Pdcl3		Egr2	1.78299	Lsmem1	-0.496109	Sptlc3	-0.229138	Slc17a2	2.63181	Acaa1b	-0.733835	Cpn1	0.138102
Poglut2	Tgfbrap1	Tbc1d8	Mrps9	Ercc5	Npas2		Gbp3	1.85629	Jmjd6	1.04257	Nat8	-0.776528	Gm4951	3.12936	Myl2	-0.413472	Gm17455	-0.134605
Col3a1	AI597479	Cnot11	Tgfbrap1	Col3a1	Rpl31		Spag8	-0.413692	Gm9804	-0.496109	Slc10a4	-0.532158	Sftpc	4.6519	Rbp7	-0.733835	Ccdc110	-0.293092
Tmeff2	Nck2	Rnf149	AI597479	Tmeff2	Tbc1d8		Gm14306	0.494079	Stard3	-0.204327	Dhx58	-0.229138	Aldh8a1	2.31874	Bhmt2	-0.276538	Smim5	-0.471164
Nabp1	Ecrg4	Creg2	Fhl2	Nabp1	Cnot11		Wdr63	0.821448	Parp3	0.662767	Cth	1.5628	Slc23a1	1.16029	Npffr2	-0.036407	Rabac1	-1.19404
Stat1	Tpp2	Map4k4	Nck2	Myo1b	Rnf149		Irf7	0.149854	Nat8	0.145787	Egr2	2.19236	Pnlip	4.09985	Txndc2	-0.276538	Nudt13	-0.471164
Gls	Ercc5	Il1r2	Ecrg4	Stat1	Creg2		1700028P14Rik	0.431493	Gprc5a	-0.342854	Gbp3	1.75927	Plek2	0.214512	Gm12500	-0.036407	Smim9	-1.54663
Nab1	Col3a1	Slc9a4	Tpp2	Gls	Map4k4		Pemt	-0.664027	Dhx58	0.339436	Spag8	-0.649175	Qprt	0.372562	Slc45a3	0.784617	Gm11111	-2.01427
Nemp2	Tmeff2	Slc9a2	Ercc5	Nab1	Il1r2		Olfr61	-1.35129	Cth	1.38744	Gm14306	0.360806	Fetub	3.56563	Gm10912	-1.14627	Fam159b	-0.134605
Mfsd6	Nabp1	Pou3f3	Slc40a1	Mfsd6	Slc9a2		Gm10709	-1.87643	Egr2	0.985817	Wdr63	1.30415	Rdh16	1.57235	Fam177a	-0.036407	Wnt8b	-0.293092
Inpp1	Gls	Tgfbrap1	Tmeff2	Inpp1	Pou3f3		Abracl	-0.807626	Tmem30c	-0.077944	1700028P14Rik	0.298973	Gm13547	-1.24657	Inmt	0.262249	Efna4	-0.134605
Asnsd1	Nab1	AI597479	Stat1	1700019D03Rik	Mrps9		1700054O13Rik	-1.35129	Gbp3	2.1518	Pemt	0.166739	Scgb3a1	-1.24657	Pnpla1	0.070164	Rsad2	1.83367
Gtf3c3	Nemp2	Nck2	Gls	Asnsd1	Tgfbrap1		Ccdc155	-0.533436	Spag8	0.51014	Gm21119	-1.44116	Hsh2d	-0.060693	Ctrl	-0.276538	Pipox	-0.674351
Hspd1	Mfsd6	Uxs1	Nab1	Gtf3c3	AI597479		Masp2	-0.200439	Gm14306	-0.077944	4931429I11Rik	-0.140795	Gm5819	-1.24657	Asb4	0.169401	Spsb2	0.56514
Mob4	Inpp1	Tpp2	Nemp2	Ankrd44	Fhl2		Fam212a	-0.303129	Wdr63	0.588471	Gm10709	-0.649175	Gm6537	-1.24657	Il2rg	-0.733835	Fcrlb	-0.910921
Plcl1	1700019D03Rik	Dnah7b	Mfsd6	Coq10b	Nck2		Tnfrsf12a	-0.664027	Irf7	1.89865	Abracl	-0.776528	H60b	-1.24657	Clrn2	-0.413472	Rbp4	0.818717
Hsfy2	Asnsd1	Tmeff2	Inpp1	Hspe1	Ecrg4		Cd36	1.20496	1700028P14Rik	0.662767	Sp7	-0.323246	AI182371	3.49002	Gm14308	0.961179	4921536K21Rik	0.367364
Satb2	Hecw2	Nabp1	Pms1	Hspd1	Uxs1		Cyp2f2	1.16705	Pemt	-0.862263	Cldn22	-0.649175	Zbp1	0.873423	Ttpa	2.2366	Crabp1	-1.54663
Tyw5	Gtf3c3	Gls	Asdurf	Plcl1	Tpp2		Ctla2b	-0.200439	9130008F23Rik	-0.667601	Gm9845	-1.66935	Aldob	6.08019	Iigp1	3.28117	Sec14l4	0.008183
Ppil3	Ankrd44	Nab1	Gtf3c3	Hsfy2	Poglut2		Hmgb2	1.0881	Gm21119	0.038255	Ccdc155	-0.649175	Tmem30b	1.32406	Tdo2	3.15367	Tgtp2	1.53658
Hycc2	Hspe1	Nemp2	Ankrd44	Satb2	Bivm		Reep6	0.66703	Olfr61	-1.35416	Tll2	-0.323246	Serpinf2	3.11824	Aunip	-1.14627	1700011E24Rik	-0.910921
Cflar	Hspd1	Mfsd6	Hspd1	Tyw5	Ercc5		Pcbd1	0.66703	Abracl	-0.667601	Cnga4	-0.423924	Gimap9	0.2957	Gsta3	1.01554	Fam89a	0.257282
Trak2	Plcl1	Inpp1	Mob4	Spats2l	Dnah7b		Glp1r	0.494079	Gm9845	-0.862263	Fam212a	0.420097	Plac8	-0.682797	Oas1a	1.26029	Cyp3a13	0.367364
Stradb	Satb2	1700019D03Rik	Plcl1	Ppil3	Slc39a10		Gm1673	-1.14645	1700054O13Rik	-1.08735	Palm3	0.360806	1700023E05Rik	-0.401072	Tcp11	-0.733835	Asgr1	-0.134605
Mpp4	Tyw5	Pms1	Hsfy2	Orc2	Tmeff2		Slfn8	0.915915	Klk6	-1.08735	Tnfrsf12a	-0.916221	1700030K09Rik	-0.535069	Cpn1	1.30462	Mgst1	2.98619
Als2	Ppil3	Asdurf	Satb2	Fam126b	Cavin2		1810011O10Rik	0.494079	Ccdc155	-0.342854	Cd36	1.8483	Uox	4.67863	Gm10109	-1.14627	C920021L13Rik	-0.471164
Fzd7	Orc2	Gtf3c3	Tyw5	Ndufb3	Nabp1		Col4a3	2.03531	Tnfrsf12a	0.427311	Cyp2f2	1.91165	C4bp	4.00647	Ifi47	1.58182	Akr1c14	1.2793
Sumo1	Fam126b	Hspe1	Spats2l	Cflar	Stat1		Sox18	0.297535	Xdh	0.985817	Ctla2b	-0.649175	Mageb16	2.58412	1700019N19Rik	-0.413472	Scnn1g	-0.134605
Nop58	Ndufb3	Hspd1	Kctd18	Trak2	Gls		Gm867	-0.807626	Alox5	0.145787	Hmgb2	1.13751	Baat	3.06133	Epx	-0.413472	Olfr574	-0.674351
Bmpr2	Trak2	Rftn2	Nif3l1	Tmem237	Nab1		Cdc45	-0.200439	6030445D17Rik	-1.08735	Reep6	1.58887	Btbd19	-0.165477	Ccdc110	1.16731	Ifi44	0.965968
Fam117b	Tmem237	Mars2	Ppil3	Als2	Nemp2		Cox7a1	-0.664027	Ctla2b	-0.342854	Pcbd1	1.30415	Lrg1	3.39188	Smim5	0.262249	Tns4	1.03432
Ica1l	Als2	Plcl1	Orc2	Fzd7	Mfsd6		Map3k6	0.554063	Hmgb2	0.339436	Glp1r	1.02743	Vnn1	-0.060693	Nudt13	-0.564779	Acp5	-0.910921
Wdr12	Fzd7	Hsfy2	Hycc2	Sumo1	Inpp1		Hist2h2ab	-0.664027	Hspb2	-1.08735	Klk10	-1.0709	Kmo	2.70793	Amica1	0.653632	Fsip1	1.03432
Nbeal1	Sumo1	Satb2	Cflar	Nop58	1700019D03Rik		Zfp947	-0.413692	Reep6	-0.342854	Slfn8	1.30415	Slc27a5	3.27662	Smim9	-0.413472	Daf2	-0.471164
Abi2	Nop58	1700066M21Rik	Trak2	Bmpr2	Pms1		Meox1	-0.664027	Pcbd1	0.038255	1810011O10Rik	0.822948	Glyat	2.51799	Gm11111	-2.13589	1700092M07Rik	-1.54663
Raph1	Bmpr2	Tyw5	Stradb	Fam117b	Asdurf		Arhgef28	0.771789	Glp1r	0.038255	Col4a3	1.7126	6820408C15Rik	0.128481	Pou2af1	-0.413472	Myb	0.65471
Nrp2	Fam117b	Spats2l	Als2	Ica1l	Gtf3c3		Mtfr2	-0.303129	Gm1673	0.038255	Sox18	0.166739	Adh1	3.86732	Fam159b	-1.14627	Ang	0.818717
Ino80d	Ica1l	Kctd18	Fzd7	Wdr12	Pgap1		Gbp4	1.83227	Slfn8	0.588471	Tnni1	0.021151	Nipal1	1.02397	Cbr2	-0.925363	Morn3	0.469638
Zdbf2	Wdr12	Bzw1	Sumo1	Abi2	Hspd1		Defb11	-1.35129	1810011O10Rik	0.245858	Gm867	-0.423924	Ttc36	2.19722	Glipr1l1	-0.564779	Mafa	-0.674351
Adam23	Abi2	Ppil3	Bmpr2	Raph1	Rftn2		Timm8a1	1.73196	Col4a3	1.86757	Cdc45	0.635538	Gm7367	0.2957	Zfp385c	-0.413472	Mcoln3	0.008183
Fam237a	Raph1	Orc2	Fam117b	Nrp2	Plcl1		Acer2	2.13687	Spata25	-1.35416	Cox7a1	-1.24419	Slc38a4	5.37838	Gpr97	-0.733835	4930556J24Rik	0.008183
Klf7	Nrp2	Fam126b	Ica1l	Ino80d	1700066M21Rik		Acot12	0.069928	Sox18	-0.496109	Sh3rf2	0.166739	Cml2	4.2139	Efna4	-1.14627	Bcl3	0.367364
Creb1	Ino80d	Cflar	Wdr12	Ndufs1	Tyw5		Polg2	0.771789	4632434I11Rik	-0.204327	Ccl21b	-1.94053	Gm3512	-0.278471	Rsad2	2.68532	1600029I14Rik	0.89422
Ccnyl1	Ndufs1	Trak2	Abi2	Eef1b2	Spats2l		Tex30	0.225584	Cdc45	0.038255	Map3k6	0.908249	Cfhr2	1.57235	Pipox	0.431738	1700003F12Rik	-0.674351
Pikfyve	Eef1b2	Stradb	Raph1	Zdbf2	Nif3l1		C1s	1.20496	Cox7a1	-0.667601	Hist2h2ab	-1.0709	Gvin1	1.66693	Rbp4	1.58182	Bst2	1.83367
Map2	Zdbf2	Tmem237	Nrp2	Adam23	Orc2		9430002A10Rik	-0.967114	Nlrc5	1.55287	Pla1a	-0.776528	Gm853	-0.535069	Il1rl2	0.583392	Gm10020	-0.674351
Unc80	Adam23	Als2	Ino80d	Gm39653	Fam126b		Gm20518	-0.104575	Map3k6	0.588471	Meox1	-0.323246	Akr1c13	0.036992	Crabp1	-1.14627	Gm10068	1.09957
Rpe	Klf7	Fzd7	Zdbf2	Klf7	Cflar		Ttc21a	1.80784	Hist2h2ab	-0.496109	Arhgef28	0.635538	Acaa1b	0.445535	Lgals12	0.784617	Gm10800	-1.19404
Acadl	Ccnyl1	Sumo1	Adam23	Mettl21a	Trak2		A3galt2	-0.303129	Zfp947	-0.496109	Mtfr2	0.234371	Bhmt2	2.50097	Zp2	0.431738	Lrrc34	-0.471164
Lancl1	Pikfyve	Bmpr2	Fam237a	Ccnyl1	Mpp4		Npm2	-0.967114	Pla1a	-0.342854	Lrdd	0.095781	Slc10a5	0.514994	Tgtp2	1.01554	Marveld3	0.367364
Erbb4	Map2	Fam117b	Klf7	Pikfyve	Als2		Pm20d1	0.869454	Meox1	-0.667601	Gbp4	1.8483	Dmgdh	3.29648	Cyp3a13	0.961179	Gm6104	-0.910921
Atic	Unc80	Ica1l	Creb1	Map2	Fzd7		Adm	-0.967114	Arhgef28	0.51014	Defb11	-1.94053	Msr1	1.81198	Asgr1	-1.14627	Phf11c	0.56514
Fn1	Rpe	Wdr12	Ccnyl1	Unc80	Sumo1		Fbxo34	0.297535	Mtfr2	0.733423	Timm8a1	3.33138	Slc45a3	0.036992	Mgst1	3.0533	Fmo2	1.2793
Tmem169	Kansl1l	Abi2	Fzd5	Rpe	Bmpr2		Crybb3	-0.664027	Gbp4	1.89865	Acer2	2.46995	P2ry4	0.128481	Ifi204	1.3894	Ifit1	2.07991
Xrcc5	Acadl	Raph1	Pikfyve	Kansl1l	Fam117b		Slfn3	-0.104575	Gm5077	-0.667601	Acot12	0.684722	Gm10912	0.036992	Gtse1	1.06792	Ccdc125	-0.134605
Marchf4	Lancl1	Nrp2	Map2	Acadl	Ica1l		Tbx6	-0.533436	Defb11	-0.342854	Muc1	-0.776528	Inmt	2.8625	Akr1c14	1.30462	Dnmt3b	0.818717
Smarcal1	Cps1	Ino80d	Unc80	Lancl1	Wdr12		Rslcan18	0.771789	Timm8a1	0.926736	Scarf1	0.095781	Lrat	1.16029	Ly6g6d	-1.14627	Gm6665	-0.910921
Igfbp2	Erbb4	Ndufs1	Rpe	Erbb4	Carf		Fpgs	1.27793	Acer2	2.12576	Wfdc18	-1.24419	1700029H14Rik	-1.03322	Mxd3	-0.925363	Sdhaf2	-0.471164
Igfbp5	Spag16	Zdbf2	Lancl1	Spag16	Abi2		Ube2l6	1.34737	Scarf1	-0.204327	Polg2	0.635538	Ctrl	2.06451	Ccr1	0.070164	Tlr8	0.367364
Arpc2	Fn1	Adam23	Erbb4	Fn1	Raph1		Hmgcs2	3.40824	Polg2	0.926736	Vipr2	-0.057551	Il2rg	-0.401072	Olfr574	0.169401	Esm1	-0.293092
Gpbar1	Xrcc5	Klf7	Atic	Tmem169	Nrp2		1700024G13Rik	-1.87643	Nkx2-1	-0.342854	Tex30	0.866229	Clrn2	-1.03322	Fbxo43	-0.151482	Il15	0.008183
Aamp	March4	Creb1	Fn1	Xrcc5	Ino80d		E230008N13Rik	0.771789	A830005F24Rik	-0.862263	C1s	0.684722	Sds	0.705311	Ifi44	2.94543	Gm4070	1.53658
Pnkd	Igfbp2	Ccnyl1	Xrcc5	March4	Ndufs1		Hist1h2ae	-0.967114	Tex30	0.339436	9430002A10Rik	-1.94053	Gm14308	0.763553	Tns4	0.583392	Ccdc113	1.4391
Catip	Igfbp5	Pikfyve	Marchf4	Igfbp2	Zdbf2		Phf11b	-1.35129	C1s	0.80078	Ttc21a	1.97233	Ttpa	6.81929	Adam5	0.72061	Gm16223	-0.674351
Vil1	Arpc2	Pth2r	Smarcal1	Igfbp5	Adam23		Itih2	2.38823	Ttc29	-0.077944	Rrad	-1.0709	Urah	1.16029	Cldn20	-0.733835	H2-Ab1	-0.134605
Cnot9	Aamp	Map2	Igfbp2	Tns1	Klf7		Cyp39a1	0.869454	9430002A10Rik	-0.077944	A3galt2	0.298973	D630039A03Rik	0.581262	Creb3l3	-0.276538	Ccl17	-1.54663
Plcd4	Pnkd	Unc80	Igfbp5	Arpc2	Mettl21a		Ttll6	0.225584	Gm20518	-0.204327	BC089491	-1.24419	Iigp1	5.41745	Fsip1	0.653632	Sbspon	1.4391
Zfp142	Tmbim1	Rpe	Arpc2	Gpbar1	Ccnyl1		Tcea3	-0.533436	Ttc21a	1.98806	Npm2	-1.24419	Rnase1	2.53481	Daf2	-0.276538	Gm5900	-1.19404
Rnf25	Catip	Acadl	Pnkd	Aamp	Fzd5		Arhgap30	0.960925	Npm2	-0.862263	Pm20d1	0.732284	Tdo2	6.67501	Gm2026	2.34671	Steap4	1.4391
Ttll4	Usp37	Lancl1	Catip	Pnkd	Idh1		Ms4a6b	0.366069	Adm	-0.667601	Adm	-1.0709	Gsta3	4.727	Mfi2	0.262249	Atf3	0.367364
Cyp27a1	Cnot9	Cps1	Slc11a1	Tmbim1	Pikfyve		Nuak2	0.225584	Fbxo34	-0.204327	Fbxo34	0.732284	Oas1a	-0.847396	Ang	-0.925363	Dnd1	-0.674351
Cdk5r2	Zfp142	Erbb4	Vil1	Catip	Map2		Fkbp11	-1.59009	Crybb3	-0.667601	Atp2c2	-0.140795	Gm9755	-0.847396	Pdzd3	-0.733835	B230104I21Rik	-1.54663
Cfap65	Rnf25	Vwc2l	Cnot9	Cnot9	Unc80		Plcd4	1.44565	Tex29	-0.862263	Crybb3	-0.776528	Cpn1	1.16029	Morn3	0.509557	Areg	-0.910921
Slc23a3	Ttll4	Atic	Plcd4	Plcd4	Rpe		Epn3	1.70576	Slfn3	0.245858	Tex29	-1.0709	Ifi47	0.819534	Mafa	-1.14627	Ttc25	2.17381
Cnppd1	Cdk5r2	Fn1	Zfp142	Zfp142	Kansl1l		Xbp1	2.3034	Tbx6	-0.667601	Slfn3	-0.140795	Cd1d1	2.9403	4930556J24Rik	-0.036407	Olfr1507	0.138102
Zfand2b	Slc23a3	Tmem169	Rnf25	Rnf25	Acadl		Rcbtb2	1.73196	Fpgs	1.1498	Cd300a	0.021151	1700019N19Rik	0.036992	Lyg2	0.169401	Nradd	-0.471164
Ankzf1	Retreg2	Xrcc5	Ttll4	Ttll4	Lancl1		Zfp934	1.0881	Gabrr2	-0.667601	Rslcan18	0.822948	Acsm5	0.128481	Lilra5	-0.413472	Trim30a	1.75485
Tuba4a	Zfand2b	March4	Cyp27a1	Cdk5r2	Cps1		Cxcl1	0.149854	Dnaaf1	-0.496109	Fpgs	1.10174	Ccdc110	0.705311	1600029I14Rik	-0.413472	Krt80	-0.293092
Dnajb2	Abcb6	Igfbp2	Cdk5r2	Slc23a3	Erbb4		Fut8	-0.104575	Ube2l6	0.245858	Gabrr2	-0.323246	Cml3	-0.278471	1700003F12Rik	0.262249	1700119I11Rik	-1.19404
Dnpep	Atg9a	Igfbp5	Cfap65	Retreg2	Ikzf2		Cebpb	0.297535	Hmgcs2	2.38914	Gm12355	-0.916221	Smim5	-0.278471	Gm21953	-1.72603	Gpr39	-0.471164
Speg	Ankzf1	Arpc2	Cnppd1	Atg9a	Spag16		Rab32	0.611652	E230008N13Rik	1.04257	Ube2l6	1.68869	Aanat	-1.03322	Bst2	1.81425	Trat1	-0.134605
Asic4	Stk16	Gpbar1	Zfand2b	Stk16	Fn1		Gm10175	-0.967114	Itih2	2.49461	Hmgcs2	3.79046	Rabac1	-0.682797	Gm10020	-1.72603	Pex16	-0.134605
Chpf	Tuba4a	Aamp	Ankzf1	Tuba4a	Mreg		Aass	2.82553	Cyp39a1	0.865132	1700024G13Rik	-1.66935	5330438I03Rik	-0.278471	Gm10068	-0.925363	A230065N10Rik	-0.471164
Tmem198	Dnajb2	Pnkd	Tuba4a	Dnajb2	Xrcc5		Helz2	2.38823	Gm10273	-0.862263	E230008N13Rik	1.02743	Nudt13	0.128481	Pdzk1ip1	-0.925363	Rps18-ps3	-1.54663
Obsl1	Ptprn	Tmbim1	Dnajb2	Ptprn	March4		Sntn	0.069928	Ttll6	0.038255	Hist1h2ae	-0.140795	Cyp2a5	2.60019	Rab40c	0.262249	Kifc3	-0.293092
Stk11ip	Dnpep	Catip	Ptprn	Dnpep	Smarcal1		Sdc1	-0.014687	Hgfac	-0.342854	Phf11b	-0.916221	Gm11111	-0.535069	Naaladl1	-0.733835	C030005K15Rik	-0.471164
Slc4a3	Des	Cnot9	Resp18	Des	Igfbp2		Klra2	-0.533436	Tcea3	0.339436	Itih2	2.32236	Ftcd	1.2445	Mettl21d	-1.40722	Tyms	0.965968
Utp14b	Speg	Plcd4	Dnpep	Speg	Igfbp5		Hist2h3b	-1.35129	Ms4a6b	0.51014	Cyp39a1	1.06507	Fam178b	-0.401072	Cabyr	1.75157	Olfr1033	-1.19404
Serpine2	Gmppa	Zfp142	Speg	Gmppa	Arpc2		Ucp3	0.494079	Fkbp11	-1.35416	Gm10273	-0.916221	Fam159b	-0.060693	AI317395	-0.276538	A230083G16Rik	-0.471164
Cul3	Asic4	Rnf25	Gmppa	Asic4	Aamp		Nnmt	0.297535	Plcd4	1.59142	2610318N02Rik	-1.24419	Fmo4	-0.278471	Lrrc34	-0.413472	Cox7b2	-0.674351
Dock10	Chpf	Stk36	Asic4	Chpf	Catip		Strip2	1.65187	Epn3	1.80333	Ttll6	0.477048	Cbr2	1.63609	Marveld3	0.72061	Nodal	-0.910921
Nyap2	Tmem198	Ttll4	Chpf	Tmem198	Usp37		Itgb4	2.07679	Xbp1	2.49461	Nlrp3	-0.057551	Gpr97	-0.682797	Gm6104	0.431738	Ccdc121	0.965968
Irs1	Obsl1	Wnt6	Tmem198	Obsl1	Cnot9		Ccdc135	2.86158	Rcbtb2	2.34469	Gm7461	-1.0709	Osgin1	0.036992	Tmem71	0.169401	Slc12a4	0.257282
Mff	Inha	Wnt10a	Obsl1	Inha	Plcd4		Smpdl3b	0.611652	Ghsr	0.926736	Tcea3	-0.649175	Rsad2	0.975515	Gm14124	-0.413472	Slc27a2	2.76268
Agfg1	Stk11ip	Cdk5r2	Inha	Stk11ip	Zfp142		Zfp869	-0.664027	Zfp934	0.588471	Arhgap30	1.17242	Pipox	2.0875	Fmo2	2.66845	Sqrdl	0.008183
Pid1	Slc4a3	Slc23a3	Slc4a3	Slc4a3	Bcs1l		Xaf1	1.62416	Cxcl1	1.47252	Ms4a6b	0.635538	Spsb2	1.11627	Cela1	1.16731	Rep15	0.008183
Trip12	Epha4	Cnppd1	Epha4	Epha4	Rnf25		Olfr550	-0.533436	Cebpb	0.145787	Nuak2	0.021151	Fcrlb	-1.24657	Ifit1	3.95906	Dbil5	-0.674351
Cab39	Utp14b	Zfand2b	Farsb	Utp14b	Ttll4		Fos	3.2174	Rab32	1.2496	Plcd4	1.48163	Rbp4	5.48824	C8g	-0.413472	Plin4	1.162
Itm2c	Scg2	Abcb6	Acsl3	Scg2	Wnt10a		5830403L16Rik	0.66703	Gm10175	-1.35416	Epn3	1.78205	Il1r2	-0.682797	Cyp26c1	-0.413472	Opn1mw	-0.293092
Psmd1	Serpine2	Atg9a	Utp14b	Serpine2	Cdk5r2		A830031A19Rik	-0.200439	Gm20715	-0.077944	Xbp1	2.33782	Chi3l3	0.214512	Ccdc125	-0.151482	1700001P01Rik	-0.134605
Armc9	Cul3	Ankzf1	Scg2	Cul3	Cfap65		Cops5	1.41363	Aass	2.70263	Rcbtb2	1.42486	C1qtnf3	0.036992	Dnmt3b	0.845903	Has2	-0.134605
B3gnt7	Dock10	Stk16	Mrpl44	Dock10	Cnppd1		Etnk2	0.611652	Helz2	3.12678	Zfp934	1.58887	Crabp1	-0.278471	Gm6665	-1.72603	Sgol2	1.09957
Ptma	Nyap2	Tuba4a	Serpine2	Nyap2	Retreg2		Zfp457	-0.413692	Sntn	0.339436	Cebpb	0.360806	Lgals12	-0.165477	Sdhaf2	-0.151482	Gm14434	0.257282
Pde6d	Irs1	Dnajb2	Cul3	Irs1	Zfand2b		Bhlha9	-1.35129	Sdc1	0.588471	Rab32	0.531836	Oit3	-0.535069	Esm1	0.070164	Grrp1	0.138102
Cops7b	Mff	Ptprn	Dock10	Mff	Atg9a		Gbp2	1.85629	Klra2	-0.077944	Gm10175	-0.776528	Sec14l4	1.2445	Tusc5	0.169401	Lmx1a	1.94439
Alppl2	Agfg1	Dnpep	Irs1	Agfg1	Ankzf1		Tgtp1	0.611652	Ucp3	0.038255	Aass	2.97396	Efcab11	-0.847396	Oasl1	0.262249	Gm9825	0.008183
Ecel1	Sphkap	Des	Mff	Sphkap	Stk16		1110059M19Rik	2.0971	Nnmt	-0.667601	Helz2	2.24249	Tgtp2	1.91835	Gm4070	2.76681	Pla2g4c	-0.134605
Eif4e2	Pid1	Speg	Agfg1	Pid1	Tuba4a		Pvrl2	0.869454	Strip2	2.66697	Sntn	0.477048	1700011E24Rik	0.128481	Slc39a11	-0.413472	Ccdc89	0.65471
Kcnj13	Trip12	Gmppa	Pid1	Trip12	Dnajb2		Fosb	1.85629	Itgb4	2.04473	Sdc1	-0.057551	Cyp3a13	3.82008	Rarres1	0.349481	Lsmem1	-0.910921
Snorc	Cab39	Asic4	Trip12	Cab39	Ptprn		Knstrn	0.72036	Ccdc135	3.50553	Ccdc60	0.166739	Ccdc69	-0.278471	Ccdc113	-0.151482	Jmjd6	2.20379
Atg16l1	Itm2c	Chpf	Fbxo36	Itm2c	Dnpep		Rnase4	3.56951	Ccdc78	-0.862263	Hist2h3b	-0.776528	Avpr1a	0.514994	H2-Ab1	-0.413472	Amh	-0.293092
Dgkd	Psmd1	Tmem198	Cab39	2810459M11Rik	Speg		Tyw5	0.149854	Smpdl3b	-0.077944	Ucp3	0.822948	Asgr1	2.19722	Ccl17	-0.564779	Gm9804	0.138102
A730008H23Rik	Htr2b	Obsl1	Itm2c	Psmd1	Gmppa		Cd274	0.431493	Zfp869	-0.342854	Nnmt	0.635538	Slc23a3	-0.847396	S100a14	0.262249	Tinagl1	0.367364
Arl4c	Armc9	Stk11ip	Psmd1	Htr2b	Chpf		5930422O12Rik	1.00457	Xaf1	1.7701	Itgb4	2.10472	Mgst1	6.65303	Gm11149	-1.14627	Hpse	0.469638
Sh3bp4	Ncl	Slc4a3	Armc9	Armc9	Tmem198		Card10	1.27793	Olfr550	-0.342854	Ccdc135	2.29094	Ifi204	1.02397	Gabra6	0.72061	Gm9905	0.469638
Agap1	Ptma	Mogat1	B3gnt7	B3gnt7	Obsl1		Ly6g6f	-1.35129	Cep72	0.339436	Ccdc78	-1.0709	Gtse1	0.128481	Serpina3g	-0.413472	Cby3	-0.910921
Gbx2	Pde6d	Utp14b	Ptma	Ncl	Inha		Rin3	1.16705	Fos	2.91512	Smpdl3b	0.477048	C920021L13Rik	0.2957	Gm5900	-2.13589	Pfkfb1	0.008183
Prlh	Cops7b	Cul3	Pde6d	Ptma	Stk11ip		Fam183b	0.915915	A830031A19Rik	0.80078	Zfp869	-0.916221	Gata6	0.372562	Steap4	1.06792	Stard3	1.33456
Lrrfip1	Dis3l2	Dock10	Alppl2	Pde6d	Slc4a3		Gm8923	0.821448	Cops5	1.47252	Xaf1	1.39562	Slc3a1	2.43081	Aldh3b2	-0.733835	Parp3	1.2793
Rbm44	Eif4e2	Nyap2	Eif4e2	Alppl2	Epha4		Hsf5	0.915915	Etnk2	0.427311	Olfr550	-1.24419	Akr1c14	4.38599	Dnd1	-0.564779	Sptlc3	0.739043
Ramp1	Kcnj13	Irs1	Efhd1	Eif4e2	Farsb		Meis1	1.53767	Zfp457	-0.496109	Fos	3.59205	F7	0.214512	Rnf151	-0.733835	Nat8	0.469638
Ube2f	Snorc	Mff	Kcnj13	Kcnj13	Acsl3		Gnrh1	-1.14645	Psmb9	0.038255	5830403L16Rik	0.732284	Scnn1g	-0.535069	B230104I21Rik	-0.733835	Slc10a4	-0.134605
Espnl	Ngef	Sphkap	Snorc	Snorc	Utp14b		Angpt2	0.494079	Bhlha9	-0.342854	A830031A19Rik	-1.0709	Ly6g6d	-1.24657	Olfr1507	0.509557	Dhx58	1.53658
Hes6	Atg16l1	Pid1	Atg16l1	Ngef	Scg2		Gpc2	0.366069	Gbp2	1.98806	Cops5	1.39562	Gys2	0.581262	Trim30a	3.35681	E230019M04Rik	-0.293092
Per2	Dgkd	Trip12	Dgkd	Atg16l1	Ap1s3		Nostrin	2.0562	Tgtp1	1.20056	Etnk2	1.33529	Olfr574	-0.682797	Arl11	0.070164	Cth	1.83367
Traf3ip1	Usp40	Cab39	A730008H23Rik	Dgkd	Wdfy1		Ppp1r42	-0.104575	2210404O07Rik	-0.667601	Zfp457	0.021151	Ifi44	1.39946	1700119I11Rik	-0.151482	Tlr5	0.008183
Asb1	A730008H23Rik	Itm2c	Arl4c	Usp40	Serpine2		Sepp1	7.95138	1110059M19Rik	2.51481	Bhlha9	-0.140795	Gnb3	0.581262	Neil3	0.349481	Pla2g2c	-0.293092
Twist2	Arl4c	2810459M11Rik	Sh3bp4	A730008H23Rik	Cul3		Fam19a5	1.24191	Pvrl2	0.865132	Gbp2	1.61448	Acp5	-0.278471	Tal2	-0.276538	Egr2	3.2956
Hdac4	Agap1	Psmd1	Gbx2	Arl4c	Dock10		Stc2	2.0562	Nyx	0.145787	Tgtp1	0.584619	Adam5	-0.165477	Gm20661	-0.564779	Tmem30c	0.89422
Gpc1	Gbx2	Htr2b	Ackr3	Sh3bp4	Nyap2		Map3k19	2.61637	Fosb	2.17737	1110059M19Rik	1.53625	Creb3l3	1.72671	Tlcd2	0.070164	Gm21598	0.008183
Dusp28	Ackr3	Armc9	Cops8	Agap1	Irs1		Cd3eap	1.78299	Knstrn	0.985817	Pvrl2	1.13751	Fsip1	-0.165477	C030005K15Rik	0.784617	Gbp3	2.54569
Rnpepl1	Prlh	B3gnt7	Col6a3	Gbx2	Col4a3		Gm9754	0.960925	Rnase4	3.22813	Fosb	2.06812	Upb1	2.44868	Tyms	1.58182	Spag8	1.09957
Capn10	Lrrfip1	Ptma	Lrrfip1	Ackr3	Mff		Gm7361	-0.104575	Tyw5	0.038255	Knstrn	0.477048	1700092M07Rik	-1.24657	Psd2	0.509557	Gm14306	0.56514
Aqp12	Rbm44	Pde6d	Rbm44	Col6a3	Agfg1		Gjb1	1.83227	Cd274	0.588471	Rnase4	3.63022	Gm2026	0.819534	Olfr1033	-0.564779	Wdr63	2.89723
Kif1a	Ramp1	Dis3l2	Ramp1	Prlh	Sphkap		Igf1	4.08868	5930422O12Rik	1.62897	Tyw5	0.477048	Ang	2.23887	A230083G16Rik	-0.151482	Adra2b	0.008183
Mterf4	Ube2f	Eif4e2	Ube2f	Lrrfip1	Pid1		Adam32	0.366069	Card10	0.926736	Cd274	0.94908	Pdzd3	0.819534	Sox3	-0.733835	Lpin3	0.469638
Ppp1r7	Espnl	Kcnj13	Hes6	Rbm44	Dner		Kifc5b	-0.104575	Rin3	1.47252	5930422O12Rik	1.06507	Morn3	-0.682797	C1rl	-0.413472	Irf7	1.83367
Hdlbp	Ilkap	Snorc	Per2	Ramp1	Trip12		Ifi27l2a	-1.87643	Nxph4	-0.496109	Cited1	-0.916221	4930556J24Rik	-1.03322	Cox7b2	0.509557	1700028P14Rik	1.62789
Stk25	Hes6	Ngef	Traf3ip1	Ube2f	Fbxo36		Gabpa	0.771789	Fam183b	-0.496109	Card10	1.73612	Atf5	-0.847396	Ccdc121	-0.036407	Six3	1.53658
Thap4	Per2	Inpp5d	Asb1	Espnl	A530032D15Rik		Trpv4	2.13687	Gm8923	0.926736	Ly6g6f	-1.44116	Bcl3	-0.535069	Sh2d4a	-0.276538	Pemt	0.008183
Gal3st2	Traf3ip1	Atg16l1	Twist2	Ilkap	Sp100		Hck	0.494079	Hsf5	1.04257	Rin3	1.36577	Pabpc1l	-0.535069	Pkp1	0.070164	Gm21119	0.138102
Fam174a	Twist2	Dgkd	Hdac4	Hes6	Cab39		Gmip	2.25	Meis1	1.73609	Fam183b	1.27233	1600029I14Rik	-0.401072	Slc22a2	-0.036407	4931429I11Rik	1.22185
Gin1	Hdac4	A730008H23Rik	Gpc1	Per2	Itm2c		Neurl2	-0.967114	Gnrh1	-0.862263	Gm8923	0.988787	Gm21953	-1.80033	Slc27a2	1.65214	Hrasls5	-1.19404
Cntnap5b	Ndufa10	Arl4c	Rnpepl1	Traf3ip1	2810459M11Rik		Lyz2	2.07679	Angpt2	0.339436	Hsf5	1.13751	Bst2	2.0875	Rep15	-0.036407	Hbq1a	-1.19404
Cdh20	Cops9	Sh3bp4	Capn10	Asb1	Psmd1		Atp5k	2.68505	Gpc2	0.80078	Meis1	1.45352	Gm10020	-0.847396	Dbil5	-1.14627	Gm10709	-0.674351
Relch	Gpc1	Agap1	Aqp12	Twist2	Htr2b		Fam214b	0.069928	Nostrin	2.17737	Gnrh1	-0.649175	Gm10068	-1.03322	D830039M14Rik	-0.733835	Parp10	0.89422
Zcchc2	Rnpepl1	Gbx2	Kif1a	Hdac4	Armc9		Bloc1s1	-1.35129	Ppp1r42	-0.077944	Angpt2	0.988787	Lrrc36	-0.682797	Plin4	0.845903	Abracl	0.89422
Bcl2	Capn10	Cops8	Ano7	Ndufa10	B3gnt7		Psmg3	0.821448	Slc12a8	0.733423	Gpc2	0.420097	Dpys	1.86615	1700001P01Rik	-0.036407	Sp7	-0.471164
Kdsr	Aqp12	Prlh	Hdlbp	Gpc1	Ncl		Serpind1	1.65187	Sepp1	7.87729	Nostrin	1.86973	Pdzk1ip1	-0.682797	Has2	0.509557	Cldn22	-1.54663
Vps4b	Kif1a	Lrrfip1	Stk25	Rnpepl1	Ptma		Rdh12	0.821448	Fam19a5	1.20056	Ppp1r42	-0.057551	Rab40c	0.763553	Sgol2	1.61741	Gm9845	-1.54663
Cntnap5a	Ppp1r7	Rbm44	Bok	Capn10	Pde6d		Morn5	-0.807626	Stc2	2.51481	Sepp1	7.90594	BC016579	-0.847396	Gm14434	-0.151482	1700054O13Rik	-1.19404
Tsn	Sept2	Ube2f	Thap4	Aqp12	Cops7b		Akna	2.3034	Map3k19	2.49461	Fam19a5	1.5628	Gm10800	-1.49704	Klhl10	-0.036407	Klk6	-0.293092
Tfcp2l1	Stk25	Espnl	Atg4b	Kif1a	Eif4e2		Ppp1r3g	1.00457	Cd3eap	1.80333	Stc2	1.75927	Cabyr	1.28483	Grrp1	-0.151482	Ccdc155	0.65471
Inhbb	Bok	Hes6	Dtymk	Hdlbp	Kcnj13		Col18a1	2.46836	Gm9754	1.04257	Map3k19	3.07887	AI317395	1.11627	Lmx1a	0.509557	Tll2	0.65471
Ralb	Thap4	Per2	Gal3st2	Stk25	Snorc		Endou	-0.200439	Gm7361	-0.342854	Cd3eap	1.42486	Lrrc34	-1.03322	Gm9825	0.169401	Dmrtb1	-0.674351
Tmem185b	Dtymk	Traf3ip1	Neu4	Bok	Ngef		Lhfpl5	-1.14645	Gjb1	1.55287	Gm9754	0.822948	Sult1c1	-0.847396	Pla2g4c	-0.276538	Fam212a	0.89422
Dbi	Ing5	Asb1	Fam174a	Thap4	Inpp5d		Sh3tc1	0.611652	Igf1	3.76364	Gm7361	0.420097	Marveld3	0.445535	Ccdc89	0.904692	Palm3	1.03432
Insig2	Gal3st2	Twist2	Macir	Atg4b	Atg16l1		I830012O16Rik	1.47698	Adam32	0.733423	Gjb1	2.08653	Tcf21	-0.847396	Lsmem1	0.509557	Tnfrsf12a	1.162
Ccdc93	Fam174a	Hdac4	Ppip5k2	Dtymk	Dgkd		Ccdc169	0.069928	Kifc5b	0.427311	Igf1	4.08421	Apol7a	-0.278471	Jmjd6	2.30367	Cd36	0.138102
Ddx18	D1Ertd622e	Ndufa10	Cntnap5b	Ing5	Usp40		Mss51	0.66703	Ifi27l2a	-1.68178	Adam32	0.531836	Gm6104	-0.535069	Gm9804	-0.733835	Xdh	1.162
Actr3	Gin1	Gpc1	Relch	D2hgdh	Glrp1		Pon3	2.0971	Gabpa	0.427311	Kifc5b	0.635538	Tmem71	0.128481	Hpse	-0.151482	F2rl2	0.367364
Lypd1	Cntnap5b	Dusp28	Zcchc2	Gal3st2	Arl4c		Hist1h3c	-1.59009	Trpv4	2.57377	Piwil2	0.166739	Phf11c	0.445535	Gm9905	0.583392	Cyp2f2	1.71375
Nckap5	Cdh20	Rnpepl1	Bcl2	Fam174a	Sh3bp4		Nppc	-0.533436	Hck	0.662767	Gabpa	0.531836	Fmo2	4.2652	Cby3	-1.72603	Tmprss5	1.22185
Mgat5	Relch	Capn10	Kdsr	D1Ertd622e	Agap1		Itih3	4.43419	Gmip	2.57377	Trpv4	2.06812	Cela1	3.30631	Pfkfb1	0.169401	Ctla2b	-0.910921
Tmem163	Zcchc2	Aqp12	Vps4b	Gin1	Gbx2		Hspb1	0.771789	Glod5	-0.862263	Hck	0.021151	Ifit1	3.01413	Parp3	0.961179	Hmgb2	1.90842
Map3k19	Phlpp1	Kif1a	Cntnap5a	Cntnap5b	Iqca		Tex22	-1.14645	Neurl2	-0.862263	Gmip	2.65409	Slc9b1	0.873423	Sptlc3	1.46947	Hspb2	-1.19404
Rab3gap1	Bcl2	Hdlbp	Tsn	Cdh20	Ackr3		Scand1	0.554063	Lyz2	1.59142	Neurl2	-0.916221	C8g	0.819534	Nat8	1.06792	Reep6	0.65471
R3hdm1	Kdsr	Stk25	Tfcp2l1	Relch	Cops8		Tirap	1.53767	Vpreb1	-1.08735	Lyz2	2.71455	Cyp26c1	-0.847396	Slc10a4	-0.413472	Pcbd1	1.38778
Ubxn4	Vps4b	Bok	Ralb	Zcchc2	Col6a3		Sdf2l1	1.0881	Atp5k	1.70126	Atp5k	3.051	Tlr6	0.372562	Gm14435	-1.14627	Glp1r	2.42359
Lct	Tsn	Thap4	Dbi	Phlpp1	Lrrfip1		Fgd2	1.00457	Fam214b	0.427311	Bloc1s1	-1.0709	Ccdc125	-0.278471	Gprc5a	1.26029	Klk10	-0.471164
Mcm6	Nifk	Atg4b	Insig2	Kdsr	Rbm44		Hist1h3b	-0.807626	Psmg3	0.588471	Psmg3	0.684722	Dnmt3b	0.819534	Kif22	0.653632	Gm1673	-1.19404
Dars1	Tfcp2l1	Dtymk	Ccdc93	Vps4b	Ube2f		Angptl4	1.16705	Serpind1	0.662767	Rnf138	-0.423924	Gm6665	-1.80033	Dhx58	0.904692	Slfn8	1.58295
Thsd7b	Gli2	D2hgdh	Htr5b	Cntnap5a	Scly		Zfp36	1.34737	Rdh12	0.588471	Serpind1	1.8483	Tlr8	-0.165477	Cth	1.75157	1810011O10Rik	2.04721
Mapkapk2	Ralb	Fam174a	Ddx18	Tsn	Ilkap		Htr6	0.494079	Nanos3	-1.35416	Rdh12	0.866229	Esm1	-0.060693	Tlr5	0.509557	Col4a3	3.11802
Eif2d	Ptpn4	St8sia4	Actr3	Tfcp2l1	Hes6		H2-T24	0.869454	Morn5	-1.08735	Nanos3	-1.24419	Il15	0.214512	Egr2	3.18957	Spata25	-0.910921
Rassf5	Dbi	D1Ertd622e	Lypd1	Ralb	Per2		mt-Nd3	3.75345	Akna	2.07225	Morn5	-1.0709	Gm4070	2.11012	Tmem30c	0.431738	Sox18	1.75485
Ikbke	C1ql2	Cntnap5b	Nckap5	Ptpn4	Traf3ip1		Aox3	2.3034	Myzap	0.339436	Akna	2.61657	Slc39a11	-0.165477	Gbp3	3.49714	Tnni1	0.56514
Srgap2	Insig2	Cdh20	Mgat5	Dbi	Asb1		Bbox1	1.85629	Ppp1r3g	1.20056	Myh15	0.477048	Rarres1	-0.278471	Spag8	1.34763	Polk	0.138102
Slc41a1	Ccdc93	Relch	Tmem163	C1ql2	Twist2		Fmo5	2.51438	Col18a1	2.22719	Ppp1r3g	1.13751	Ccdc113	1.36225	Gm14306	2.58104	Gm867	0.257282
Nucks1	Ddx18	Zcchc2	Ccnt2	Insig2	Ndufa10		C7	0.297535	Endou	-0.077944	Col18a1	2.46995	H2-Ab1	0.372562	Wdr63	1.61741	Ush1g	-0.293092
Elk4	Dpp10	Phlpp1	Map3k19	Ccdc93	Cops9		Spsb4	0.431493	Sh3tc1	0.865132	Lhfpl5	-0.532158	Ccl17	-0.682797	Lpin3	-0.276538	4632434I11Rik	-0.134605
Mfsd4a	Actr3	Bcl2	R3hdm1	Ddx18	Gpc1		Cdo1	4.12374	I830012O16Rik	1.34294	Sh3tc1	0.531836	Sbspon	1.39946	Irf7	2.16626	Cdc45	0.818717
Klhdc8a	Slc35f5	Cdh19	Ubxn4	Dpp10	Rnpepl1		Gm7808	-1.35129	Oprl1	0.339436	I830012O16Rik	1.10174	Cpa2	1.7557	1700028P14Rik	1.68605	Cox7a1	0.469638
Tmcc2	Lypd1	Cntnap5a	Lct	Actr3	Kif1a		Sycp2	1.7577	Mss51	0.339436	Ccdc169	0.298973	Hs3st3b1	2.01742	Six3	0.169401	Nlrc5	1.4391
Dstyk	Nckap5	Tsn	Dars1	Slc35f5	Mterf4		Gm10335	-0.413692	Pon3	2.66697	Zfp820	0.095781	Gabra6	-0.535069	Pemt	0.262249	Sh3rf2	1.22185
Tmem81	Mgat5	Tfcp2l1	Thsd7b	Lypd1	Ppp1r7		Foxf1	-0.413692	Nppc	-0.204327	Mss51	0.635538	Nlrp6	1.07086	Bmp15	-0.276538	Map3k6	1.90842
Cntn2	Tmem163	Gli2	Il10	Nckap5	Hdlbp		Sec14l3	0.611652	Itih3	4.28262	Pon3	2.27497	Serpina3g	-0.278471	9130008F23Rik	0.262249	Tnfsf9	-1.19404
Nfasc	Rab3gap1	Inhbb	Mapkapk2	Tmem163	Farp2		Mtrr	-0.014687	Hspb1	0.865132	Hist1h3c	-0.423924	Gm5900	-0.165477	Gm21119	0.583392	Hist2h2ab	0.818717
Lrrn2	R3hdm1	Ralb	Eif2d	Ccnt2	Stk25		Gm4737	1.92605	Scand1	-0.342854	Nppc	-1.24419	Steap4	2.67796	Olfr61	-1.14627	Vil1	-0.293092
Pik3c2b	Ubxn4	Ptpn4	Rassf5	Map3k19	Bok		Tnnc1	0.069928	Ppp1r16a	0.51014	Itih3	4.54009	Atf3	1.2445	Gm10709	-0.925363	Zfp947	1.22185
Ppp1r15b	Lct	C1ql2	Ikbke	Rab3gap1	Thap4		Dpep1	-0.533436	Tirap	0.588471	Hspb1	1.02743	Aldh3b2	-0.847396	Parp10	0.431738	Fam227b	-0.674351
Golt1a	Mcm6	Insig2	Srgap2	R3hdm1	Dtymk		Gm14403	0.225584	Mlkl	-0.342854	Tex22	-0.916221	Dnd1	0.581262	Abracl	0.509557	Pla1a	-0.674351
Etnk2	Dars	Ccdc93	Slc41a1	Ubxn4	Ing5		Flt4	1.62416	Sdf2l1	1.43061	Scand1	1.10174	Rnf151	-1.24657	Sp7	1.34763	Meox1	1.162
Lax1	Thsd7b	Ddx18	Nucks1	Mcm6	D2hgdh		1700023F06Rik	-0.104575	Pxdc1	-0.862263	Ppp1r16a	0.021151	Gm10837	-0.278471	Cldn22	-0.151482	Mtfr1	0.008183
Atp2b4	Pfkfb2	Dpp10	Elk4	Dars	Gal3st2		F5	5.63405	Fgd2	1.04257	Gimap4	-0.776528	Ttc25	1.57235	Gm9845	-0.276538	Arhgef28	0.65471
Optc	Mapkapk2	Actr3	Mfsd4a	Thsd7b	D1Ertd622e		Trim12c	1.78299	Hist1h3b	-1.08735	Tirap	1.86973	Olfr1507	-0.535069	1700054O13Rik	-1.40722	Mtfr2	-0.134605
Prelp	Eif2d	Slc35f5	Tmcc2	Pfkfb2	Cntnap5b		Trim16	0.66703	Angptl4	0.588471	Sdf2l1	1.95238	Nradd	0.214512	Klk6	-0.564779	Setdb2	0.469638
Fmod	Rassf5	Lypd1	Dstyk	Yod1	Cdh20		Tmem140	0.366069	Msc	-0.342854	Fgd2	1.30415	Trim30a	3.12936	Nxf3	-0.151482	Lrdd	0.65471
Btg2	Srgap2	Nckap5	Tmem81	Il10	Relch		Ass1	3.66781	Zfp36	0.588471	Hist1h3b	-0.776528	Krt80	-0.847396	Ccdc155	-0.413472	Gbp4	3.00334
Mybph	Slc41a1	Mgat5	Cntn2	Mapkapk2	Tnfrsf11a		Agmat	-0.533436	Htr6	0.662767	Angptl4	1.17242	1700119I11Rik	-1.80033	Tll2	-0.276538	Gm5077	-0.674351
Adora1	Rab29	Tmem163	Nfasc	Rassf5	Zcchc2		Medag	0.366069	H2-T24	1.51326	Zfp36	1.68869	Gm20661	0.64462	Cnga4	0.583392	Defb11	-1.19404
Myog	Nucks1	Ccnt2	Lrrn2	Srgap2	Phlpp1		Slc8a1	-0.200439	mt-Nd3	5.93875	Htr6	0.360806	Trat1	-0.847396	Fam212a	0.653632	Timm8a1	3.28161
Ppfia4	Elk4	Map3k19	Mdm4	Slc41a1	Bcl2		Adam1a	2.8734	Aox3	2.29883	H2-T24	0.360806	1700067K01Rik	-0.847396	Tnfrsf12a	0.653632	Acer2	3.1645
Adipor1	Mfsd4a	R3hdm1	Pik3c2b	Rab29	Kdsr		Tmc4	2.40462	Bbox1	1.70126	mt-Nd3	4.33202	Pex16	0.2957	Cd36	0.070164	Acot12	0.469638
Kdm5b	Cdk18	Ubxn4	Ppp1r15b	Nucks1	Tsn		Ifitm3	1.47698	Fmo5	2.59289	Aox3	2.53845	A230065N10Rik	-1.24657	Xdh	1.06792	Bub1	0.008183
Syt2	Klhdc8a	Mcm6	Golt1a	Elk4	Tfcp2l1		Cyp2s1	0.366069	C7	-0.204327	Bbox1	2.06812	Tlcd2	1.99328	Clspn	1.42999	Muc1	0.138102
Ppp1r12b	Tmcc2	Dars	Etnk2	Mfsd4a	Inhbb		Igfbpl1	1.41363	Spsb4	0.427311	Fmo5	2.66639	C8b	1.96874	Alox5	1.06792	Scarf1	1.09957
Gpr37l1	Tmem81	Thsd7b	Sox13	Cdk18	Ralb		Rcsd1	1.44565	Fbxl8	-0.667601	C7	-0.140795	Rps18-ps3	-1.03322	6030445D17Rik	-0.036407	Cdk15	0.008183
Elf3	Cntn2	Pfkfb2	Snrpe	Tmcc2	Tmem185b		Clec5a	0.366069	Cdo1	4.0324	Spsb4	0.095781	C030005K15Rik	0.975515	Tmprss5	-0.413472	Wfdc18	-0.471164
Rnpep	Nfasc	Yod1	Zbed6	Dstyk	Ptpn4		Slc43a3	0.149854	Sycp2	1.38744	Cdo1	4.14698	Tyms	0.873423	Spata19	-1.72603	Polg2	1.94439
Lmod1	Lrrn2	Il10	Lax1	Rbbp5	Tmem37		Tor4a	1.12811	Ren1	-1.08735	Gm7808	-1.44116	Olfr1033	0.581262	Ctla2b	1.42999	Vipr2	0.138102
Shisa4	Pik3c2b	Mapkapk2	Atp2b4	Tmem81	Dbi		Hspa1a	2.33794	Gm10335	-0.667601	Sycp2	2.22597	A230083G16Rik	0.372562	Hmgb2	1.78325	Nkx2-1	0.008183
Ipo9	Ppp1r15b	Eif2d	Optc	Cntn2	C1ql2		Rtp4	1.31307	Foxf1	0.145787	Gm10335	0.420097	Sox3	-0.847396	Hspb2	-1.14627	A830005F24Rik	-1.19404
Phlda3	Golt1a	Rassf5	Prelp	Nfasc	Marco		Slc25a13	2.11712	Sec14l3	-0.496109	Foxf1	-0.229138	C1rl	1.43574	Reep6	1.42999	Tex30	1.71375
Tnnt2	Etnk2	Ikbke	Fmod	Lrrn2	Ccdc93		1700016K19Rik	-0.413692	Mtrr	0.51014	Sec14l3	0.94908	Ccdc121	0.705311	Pcbd1	1.26029	C1s	0.89422
Igfn1	Zbed6	Srgap2	Btg2	Pik3c2b	Ddx18		Gm9945	-0.200439	Gm4737	1.80333	Mtrr	0.360806	Slc27a2	5.02363	Glp1r	1.61741	Ttc29	0.89422
Kif21b	Optc	Slc41a1	Mybph	Ppp1r15b	Dpp10		Iqcd	-0.104575	Tnnc1	0.245858	Gm4737	1.68869	Tcap	-0.401072	Dram1	1.16731	1700101E01Rik	0.469638
Gpr25	Prelp	Rab29	Adora1	Golt1a	Actr3		Rbpms2	0.72036	Dpep1	-0.667601	Tnnc1	-0.323246	Gckr	0.64462	Gm1673	0.509557	9430002A10Rik	0.65471
Camsap2	Fmod	Nucks1	Myog	Etnk2	Lypd1		Olfr267	-1.59009	Gm14403	0.427311	Dpep1	-0.140795	Prx	0.214512	Slfn8	2.21353	Gm20518	0.469638
Zfp281	Btg2	Elk4	Ppfia4	Zbed6	Nckap5		Omp	-0.413692	Flt4	1.59142	Gm14403	-0.140795	Rep15	0.036992	2810408A11Rik	-0.733835	Ttc21a	3.17967
Nek7	Mybph	Mfsd4a	Adipor1	Lax1	Mgat5		Abhd15	0.149854	1700023F06Rik	-1.08735	Flt4	1.36577	Dbil5	-1.24657	1810011O10Rik	1.3894	A3galt2	1.162
Lhx9	Adora1	Cdk18	Kdm5b	Optc	Ccnt2		Tmem252	-0.303129	F5	6.2502	1700023F06Rik	-0.649175	Colq	-0.060693	Col4a3	2.75087	BC089491	-0.910921
2310009B15Rik	Ppfia4	Klhdc8a	Syt2	Prelp	Rab3gap1		Gm20517	1.41363	Trim12c	1.92907	F5	5.0021	F2rl1	-0.535069	Casp4	-0.036407	Npm2	-0.134605
B3galt2	Tmem183a	Tmcc2	Ppp1r12b	Fmod	R3hdm1		Sctr	-0.533436	Trim16	1.34294	Trim12c	1.91165	Vnn3	-0.165477	Tnni1	0.904692	Adm	-0.293092
Cdc73	Adipor1	Tmem81	Gpr37l1	Btg2	Ubxn4		Acy3	-0.967114	Ass1	3.63112	Cyp2j8	-0.916221	D830039M14Rik	0.372562	Hist1h2ap	-1.72603	Fbxo34	1.67146
Glrx2	Rabif	Cntn2	Elf3	Mybph	Lct		Dynlt1f	-0.664027	Medag	0.427311	Ass1	4.00896	Rpl7a-ps3	-1.24657	Gm867	-0.276538	Atp2c2	-0.293092
Odr4	Kdm5b	Nfasc	Rnpep	Adora1	Dars		Fxn	0.431493	Adam1a	3.1136	Agmat	-0.649175	Plin4	0.975515	4632434I11Rik	0.784617	Crybb3	0.56514
Prg4	Syt2	Lrrn2	Timm17a	Myog	Thsd7b		Parp14	3.19873	Tmc4	1.89865	Medag	0.732284	Has2	0.581262	Orc1	-0.036407	Gm11710	-1.54663
Trmt1l	Ppp1r12b	Pik3c2b	Shisa4	Ppfia4	Pfkfb2		Scnn1a	1.97075	Ifitm3	0.926736	Slc8a1	-0.057551	Sgol2	1.28483	Cdc45	0.904692	Tex29	-0.134605
Edem3	Arl8a	Ppp1r15b	Ipo9	Tmem183a	Yod1		1700064H15Rik	-1.87643	Cyp2s1	0.339436	Adam1a	2.77257	Sec24d	0.514994	Nlrc5	1.01554	Slfn3	-0.674351
1700025G04Rik	Gpr37l1	Golt1a	Phlda3	Adipor1	Mapkapk2		Gm2840	-1.87643	Igfbpl1	1.20056	Tmc4	2.24249	Gm14434	3.26658	Map3k6	1.54534	Tbx6	-0.471164
Rgl1	Rnpep	Etnk2	Tmem9	Kdm5b	Eif2d		Zfp454	2.15635	Rcsd1	1.7701	Ifitm3	1.93216	Grrp1	0.925372	3930402G23Rik	-0.413472	Cd300a	0.138102
Ncf2	Lmod1	Sox13	Kif21b	Syt2	Ikbke		Yjefn3	0.72036	Clec5a	-0.077944	Cyp2s1	0.234371	Lmx1a	1.63609	Hist2h2ab	-0.733835	Fpgs	2.01374
Lamc2	Shisa4	Zbed6	Gpr25	Ppp1r12b	Srgap2		Flt3l	1.00457	Slc43a3	0.51014	Ribc1	-0.916221	Gm9825	-0.401072	Pla1a	-0.276538	Gabrr2	0.739043
Lamc1	Ipo9	Optc	Camsap2	Gpr37l1	Fam72a		Aurka	-0.664027	Tor4a	0.339436	Igfbpl1	1.5092	Pla2g4c	0.705311	Meox1	0.262249	Gm12355	-0.293092
Dhx9	Nav1	Prelp	Zfp281	Rnpep	Rab7b		1110002L01Rik	-0.104575	Hspa1a	2.12576	Rcsd1	1.66437	Dusp13	0.514994	Arhgef28	1.5079	Ube2l6	1.94439
Rgs8	Csrp1	Fmod	Nek7	Timm17a	Slc41a1		Egr4	1.87992	Rtp4	1.09718	Clec5a	-0.057551	Tmprss6	1.28483	E2f7	0.961179	Hmgcs2	3.08617
Rgs16	Phlda3	Mybph	Lhx9	Lmod1	Nucks1		Ccdc158	0.431493	Slc25a13	2.49461	Slc43a3	0.095781	Ccdc89	-0.847396	Mtfr2	2.01437	E230008N13Rik	2.44885
Teddm1a	Tnnt2	Adora1	B3galt2	Shisa4	Elk4		Frrs1	1.27793	1700016K19Rik	-0.204327	Tor4a	0.732284	Lsmem1	0.036992	Lrdd	0.653632	Hist1h2ae	0.739043
Glul	Igfn1	Myog	Cdc73	Ipo9	Mfsd4a		Gm10076	0.494079	Gm9945	-0.077944	Hspa1a	2.06812	Jmjd6	1.89249	Gbp4	2.21353	Itih2	2.01374
Cacna1e	Tmem9	Ppfia4	Glrx2	Nav1	Cdk18		Wdr95	0.225584	Iqcd	-0.862263	Rtp4	0.822948	Amh	0.036992	Gm5077	-0.151482	Cyp39a1	1.87153
Ier5	Kif21b	Tmem183a	Uchl5	Phlda3	Tmcc2		Sp140	0.149854	Rbpms2	0.733423	Slc25a13	1.63964	Gm9804	1.57235	Defb11	0.262249	Gm10273	-0.134605
Stx6	Inava	Cyb5r1	Rgs2	Tnnt2	Dstyk		Cuedc1	1.00457	Olfr267	-1.08735	1700016K19Rik	-0.916221	Tinagl1	0.372562	Timm8a1	3.50666	2610318N02Rik	-0.910921
BC034090	Gpr25	Adipor1	Odr4	Igfn1	Rbbp5		Gm8991	0.821448	Omp	-0.204327	Gm9945	0.234371	Hpse	0.64462	Acer2	3.2475	Ttll6	1.162
Xpr1	Camsap2	Kdm5b	Prg4	Tmem9	Tmem81		Lgals9	1.87992	Abhd15	-0.342854	Iqcd	-0.057551	Tph1	0.705311	Bub1	-0.036407	Gm1661	0.367364
Acbd6	Zfp281	Syt2	Ivns1abp	Kif21b	Cntn2		Zmym5	0.72036	Tmem252	0.588471	Rbpms2	0.298973	H2-Ke6	-0.682797	Cdk15	-0.036407	Tcea3	0.138102
Qsox1	Nek7	Ppp1r12b	Trmt1l	Inava	Nfasc		Dok3	1.16705	Gm20517	1.38744	Olfr267	-1.44116	Gm9905	0.581262	Polg2	1.65214	Arhgap30	1.22185
Cep350	Lhx9	Ube2t	Edem3	Gpr25	Lrrn2		Wdr86	2.23175	Sctr	-0.077944	Omp	-0.532158	Hoxa5	-0.847396	Vipr2	0.583392	Ms4a6b	1.09957
Tor1aip2	Zbtb41	Arl8a	1700025G04Rik	Camsap2	Mdm4		Npl	0.225584	Dynlt1f	-1.08735	Tmem252	-0.532158	Pfkfb1	0.873423	Nkx2-1	0.070164	Nuak2	1.4391
Soat1	Kcnt2	Gpr37l1	Rgl1	Zfp281	Pik3c2b		Hddc3	1.62416	Fxn	0.038255	Piezo2	1.68869	Stard3	0.445535	A830005F24Rik	-0.733835	Fkbp11	-1.54663
Tor3a	B3galt2	Rnpep	Apobec4	Nek7	Ppp1r15b		Znhit2	1.0881	Parp14	3.56486	Gm20517	0.778328	Parp3	2.04116	Tex30	1.30462	Plcd4	2.17381
Brinp2	Cdc73	Lmod1	Arpc5	Lhx9	Golt1a		Snai2	0.431493	Scnn1a	1.73609	Sctr	-0.423924	Sptlc3	0.128481	C1s	1.21455	Epn3	3.19468
Astn1	Glrx2	Shisa4	Ncf2	2310009B15Rik	Zbed6		Scn5a	2.0562	1700064H15Rik	-2.10635	Shox2	-0.140795	Nat8	0.514994	Ttc29	0.72061	Xbp1	2.78269
Cop1	Uchl5	Ipo9	Smg7	Cfh	Lax1		Ppt2	2.0562	Gm2840	-2.10635	Acy3	-0.649175	Slc10a4	0.581262	1700101E01Rik	-0.276538	Rcbtb2	2.20379
Tnr	Rgs2	Nav1	Lamc2	Kcnt2	Atp2b4		Lag3	-0.413692	Zfp454	1.70126	Dynlt1f	-0.057551	Gm14435	-1.24657	9430002A10Rik	-0.036407	Ghsr	0.965968
Mrps14	Ptgs2	Csrp1	Lamc1	B3galt2	Optc		Pkd2l2	-0.104575	Yjefn3	-0.862263	Fxn	0.298973	Gprc5a	-0.682797	Gm20518	0.653632	Zfp934	2.49808
Cacybp	Tpr	Phlda3	Dhx9	Cdc73	Prelp		Zdhhc12	0.225584	Flt3l	1.2496	Parp14	2.8063	Dhx58	0.763553	Ttc21a	2.97317	Fut8	0.257282
Rabgap1l	Odr4	Tnnt2	Rgs8	Glrx2	Fmod		Spa17	0.069928	Aurka	-0.667601	Scnn1a	2.22597	Cth	3.66064	Rrad	-0.564779	Cebpb	1.09957
Rc3h1	Prg4	Igfn1	Rgs16	Uchl5	Mybph		Ctla2a	0.72036	1110002L01Rik	0.245858	Gm2840	-1.94053	Tlr5	0.128481	A3galt2	1.01554	Rab32	0.89422
Prdx6	Ivns1abp	Tmem9	Glul	Rgs2	Adora1		Eaf2	0.431493	Egr4	1.09718	Zfp454	2.35311	Egr2	2.50097	Npm2	-0.413472	Gm10175	-0.293092
4930558K02Rik	Trmt1l	Kif21b	Cacna1e	Odr4	Myog		Agpat2	-0.413692	Frrs1	2.04473	Yjefn3	0.866229	Zbtb42	0.925372	Pm20d1	1.93198	Gm20715	0.138102
Dnm3	Edem3	Inava	Ier5	Prg4	Ppfia4		B230216G23Rik	0.366069	Gm10076	-0.496109	Flt3l	0.908249	Tmem30c	0.705311	Adm	-0.151482	Ccnb1	0.138102
Myoc	1700025G04Rik	Gpr25	Stx6	Trmt1l	Tmem183a		Ifit3	2.48386	Wdr95	-0.204327	1110002L01Rik	-0.140795	Ttk	0.214512	Fbxo34	1.21455	Aass	3.20954
Myocos	Rgl1	Camsap2	BC034090	Edem3	Adipor1		Sh3kbp1	1.53767	Sp140	-0.077944	Slc4a11	0.234371	Gbp3	3.41932	Depdc1a	-0.413472	Helz2	3.51478
Prrc2c	Ncf2	Zfp281	Xpr1	1700025G04Rik	Klhl12		AI607873	-0.303129	Rpl22	0.245858	Egr4	1.97233	Spag8	0.705311	Atp2c2	1.06792	Sntn	1.162
Kifap3	Nmnat2	Nek7	Acbd6	Tsen15	Rabif		S100a4	-0.413692	Cuedc1	0.662767	Ccdc158	0.822948	Gm14306	-0.060693	Ccdc105	-0.036407	Sdc1	0.138102
Scyl3	Lamc2	Lhx9	Qsox1	Rgl1	Kdm5b		Socs3	-0.413692	Gm8991	-0.077944	Frrs1	1.33529	Wdr63	1.66693	Crybb3	0.169401	Ccdc60	1.71375
Ccdc181	Lamc1	Dennd1b	Cep350	Ncf2	Syt2		Oasl2	1.80784	Lgals9	1.34294	Gm10076	0.732284	Lpin3	0.975515	Tex29	-0.733835	Hist2h3b	-1.19404
Blzf1	Shcbp1l	Aspm	Tor1aip1	Smg7	Ppp1r12b		C1ra	1.0881	Zmym5	1.09718	Wdr95	0.360806	Irf7	2.11012	Slfn3	1.30462	Ucp3	1.75485
Atp1b1	Dhx9	Kcnt2	Tor1aip2	Lamc1	Arl8a		Gzmk	-0.413692	Dok3	0.926736	Sp140	0.095781	1700028P14Rik	1.72671	Tbx6	-0.925363	Strip2	2.96883
Gpr161	Rgs8	B3galt2	Axdnd1	Dhx9	Gpr37l1		Zbtb8a	1.24191	Wdr86	2.73742	Cuedc1	1.06507	Six3	0.64462	Cd300a	0.904692	Itgb4	3.49066
Dcaf6	Rgs16	Glrx2	Soat1	Rgs8	Rnpep		Ahcy	4.09374	Npl	1.55287	Gm8991	1.58887	Pemt	1.50566	Rslcan18	2.34671	Ccdc135	4.59271
Mpzl1	Glul	Uchl5	Tor3a	Rgs16	Timm17a		Ssc5d	1.00457	Hddc3	1.80333	Lgals9	1.82655	Yipf2	-0.847396	Fpgs	2.34671	Ccdc78	-0.910921
Pou2f1	Cacna1e	Rgs2	Fam20b	Glul	Shisa4		Plekhj1	0.431493	Znhit2	1.09718	Zmym5	0.477048	Gm21119	-0.682797	Gabrr2	-0.733835	Awat2	-0.910921
Ildr2	Ier5	Ptgs2	Rasal2	Cacna1e	Ipo9		Cysltr1	0.431493	Snai2	0.245858	Dok3	1.61448	Olfr61	0.2957	Dnaaf1	0.784617	Smpdl3b	0.56514
Tada1	BC034090	Odr4	Brinp2	Ier5	Nav1		Pou5f2	1.20496	Scn5a	1.29702	Wdr86	1.39562	4931429I11Rik	1.02397	Ube2l6	2.2593	Zfp869	0.965968
Pogk	Xpr1	Prg4	Astn1	Stx6	Phlda3		Myo1h	0.431493	Ppt2	2.34469	Npl	0.584619	Gm10709	0.036992	Hmgcs2	3.00038	Xaf1	2.01374
Fam78b	Acbd6	Hmcn1	Cop1	BC034090	Tnnt2		Tfr2	1.44565	Ttc16	0.427311	Hddc3	1.53625	Parp10	0.581262	E230008N13Rik	1.87431	Olfr550	-1.54663
Uck2	Qsox1	Ivns1abp	Tnr	Xpr1	Igfn1		Rnf133	0.225584	Shcbp1	0.427311	Znhit2	1.42486	Abracl	-1.24657	Hist1h2ae	-0.925363	Cep72	0.89422
Aldh9a1	Cep350	Swt1	Mrps14	Acbd6	Tmem9		Sh3bp2	1.7577	Lag3	0.427311	Snai2	-0.057551	Sp7	-0.165477	Phf11b	0.070164	Fos	4.73299
Rxrg	Tor1aip2	Trmt1l	Cacybp	Qsox1	Ascl5		Dnah3	2.37166	Pkd2l2	0.038255	Scn5a	2.33782	Cldn22	0.128481	Itih2	1.21455	5830403L16Rik	0.965968
Pbx1	Fam163a	Edem3	Rabgap1l	Cep350	Kif21b		Rasip1	1.44565	Zdhhc12	0.427311	Ppt2	1.97233	Gm9845	-0.401072	Cyp39a1	1.65214	A830031A19Rik	1.162
Nuf2	Soat1	1700025G04Rik	Rc3h1	Tor1aip1	Inava		Zfp935	-0.807626	Spa17	-0.342854	Ttc16	0.420097	1700054O13Rik	0.128481	Gm10273	-0.564779	Cops5	2.42359
Rgs4	Tor3a	Colgalt2	Klhl20	Tor1aip2	Gpr25		Shmt1	1.34737	Ctla2a	0.51014	Pkd2l2	-0.423924	Ccdc155	1.07086	Hmmr	0.653632	Etnk2	0.65471
Uap1	Ralgps2	Rgl1	Prdx6	Fam163a	Camsap2		1700040L02Rik	0.069928	Eaf2	0.245858	Zdhhc12	0.866229	Anks4b	1.50566	Mtl5	0.583392	Zfp457	-0.293092
Uhmk1	Tex35	Arpc5	4930558K02Rik	Soat1	Zfp281		Hoga1	-0.104575	Agpat2	-0.342854	Spa17	0.420097	Irx2	-0.401072	Ttll6	1.61741	Psmb9	0.469638
Gm7694	Rasal2	Ncf2	Dnm3	Tor3a	Ptprc		Crhr2	0.72036	B230216G23Rik	-0.204327	Ctla2a	1.06507	Masp2	1.72671	Spn	0.262249	Bhlha9	-0.471164
Spata46	Brinp2	Smg7	Mettl13	Angptl1	Lhx9		Mndal	2.54426	Ifit3	2.93024	Eaf2	0.477048	Cnga4	0.372562	Aldh1a3	0.169401	Gbp2	2.86005
Nos1ap	Astn1	Lamc2	Myoc	Tex35	2310009B15Rik		Sertad1	0.72036	Sh3kbp1	0.985817	B230216G23Rik	0.684722	Fam212a	0.873423	Hgfac	0.070164	Tgtp1	1.4391
Olfml2b	Cop1	Lamc1	Myocos	Brinp2	Dennd1b		Tmem138	0.366069	Arsi	-0.204327	Ifit3	2.04946	Palm3	1.28483	Nlrp3	0.070164	Upk1a	-0.910921
Cfap126	Tnr	Dhx9	Prrc2c	Astn1	Zbtb41		Dnah2	3.56951	AI607873	0.145787	Sh3kbp1	1.78205	Tnfrsf12a	0.514994	Gm7461	-1.14627	2210404O07Rik	-0.910921
Mpz	Mrps14	Rgs8	Prrx1	Tnr	Cfh		Pnma1	0.611652	Orc6	-0.342854	Ssfa2	0.360806	Cd36	3.68345	Tcea3	0.509557	1110059M19Rik	2.95126
Pcp4l1	Cacybp	Rnasel	Kifap3	Mrps14	Kcnt2		Cldn1	3.19873	Hpn	0.51014	S100a4	0.095781	Xdh	1.60457	Arhgap30	2.2593	Pvrl2	1.87153
Tomm40l	Rabgap1l	Glul	Scyl3	Cacybp	B3galt2		Mob4	1.04694	S100a4	-0.862263	Rad51b	-0.916221	Alox5	0.445535	Ms4a6b	1.61741	Nyx	0.257282
Adamts4	Rc3h1	Zfp648	Ccdc181	Rabgap1l	Cdc73		Lad1	0.297535	Oasl2	1.7701	Socs3	0.298973	6030445D17Rik	-0.060693	Nuak2	0.509557	Fosb	2.70094
B4galt3	Serpinc1	Cacna1e	Blzf1	Rc3h1	Glrx2		Chst14	-0.104575	Gzmk	-0.342854	Oasl2	1.97233	Cyp2f2	3.3733	Fkbp11	-1.14627	Knstrn	1.22185
Ppox	Klhl20	Ier5	Atp1b1	Serpinc1	Ro60		Chek2	0.611652	Zbtb8a	1.47252	C1ra	1.5628	Ctla2b	0.581262	Plcd4	2.40896	Rnase4	3.35025
Usp21	Ankrd45	BC034090	Sft2d2	Klhl20	Uchl5		Lrrc51	0.771789	Ahcy	4.10747	Gzmk	-0.532158	Hmgb2	2.37587	Epn3	2.04082	Tyw5	1.38778
Dedd	Prdx6	Xpr1	Tiprl	Ankrd45	Rgs2		Isl1	0.069928	Ssc5d	0.662767	Zbtb8a	0.684722	Hspb2	-1.24657	Xbp1	3.44858	Cd274	1.53658
Pfdn2	Dnm3	Acbd6	Gpr161	Dnm3	Ptgs2		Grap	0.366069	Plekhj1	0.145787	Ahcy	4.06576	Reep6	2.92762	Rcbtb2	3.15367	5930422O12Rik	0.65471
Nit1	Myoc	Qsox1	Mpc2	Myoc	Tpr		Scrt2	2.68505	Cysltr1	0.339436	Ssc5d	1.48163	Pcbd1	2.61608	Ghsr	0.904692	Cited1	-0.293092
Usf1	Myocos	Cep350	Creg1	Myocos	Odr4		Adora2b	1.24191	Pou5f2	1.55287	Plekhj1	0.684722	Xlr4b	0.036992	Zfp934	1.61741	Card10	2.20379
Vangl2	Prrc2c	Tor1aip1	Pou2f1	Prrc2c	Prg4		Ccdc126	2.90829	Myo1h	0.80078	Cysltr1	0.477048	Glp1r	0.445535	Cxcl1	1.71918	Rin3	1.67146
Ncstn	Prrx1	Tor1aip2	Ildr2	Kifap3	Ivns1abp		Gck	-0.014687	Adora2a	0.038255	Pou5f2	1.36577	Klk10	-0.535069	Fut8	0.784617	Nxph4	-0.674351
Pex19	Kifap3	Fam163a	Pogk	Scyl3	Trmt1l		9930111J21Rik2	1.62416	Tfr2	0.985817	Igbp1b	-0.229138	Dram1	-0.401072	Cebpb	-0.733835	Fam183b	2.1119
Pea15a	Scyl3	Tdrd5	Fam78b	Slc19a2	Edem3		Myo1a	-0.014687	Rnf133	-0.862263	Tfr2	1.5628	Cers3	0.581262	Rab32	2.2366	Gm8923	1.162
Atp1a4	F5	Soat1	Uck2	Ccdc181	1700025G04Rik		Surf1	-0.664027	Sh3bp2	1.51326	Rnf133	0.234371	Gm1673	0.514994	Gm10175	-0.413472	Hsf5	1.71375
Atp1a2	Slc19a2	Tor3a	Tmco1	Blzf1	Rgl1		Slc37a2	2.64424	Dnah3	2.20249	Sh3bp2	1.58887	Slfn8	2.31874	Gm20715	0.72061	Meis1	2.39788
Pigm	Ccdc181	Angptl1	Aldh9a1	Atp1b1	Arpc5		Ltc4s	0.225584	Rasip1	1.2496	Dnah3	2.20926	2810408A11Rik	-0.165477	Tnnt1	-0.733835	Gnrh1	-0.134605
Cfap45	Blzf1	Tex35	Pbx1	Dcaf6	Ncf2		5033430I15Rik	-0.413692	Zfp935	-0.342854	Rasip1	1.86973	1810011O10Rik	1.32406	Aass	3.40851	Angpt2	1.71375
Ackr1	Atp1b1	Brinp2	Ccdc190	Mpzl1	Smg7		Galm	1.20496	Shmt1	1.43061	Zfp935	-0.776528	Col4a3	3.10704	Helz2	3.68495	Hist1h2ah	-1.54663
Cadm3	Dcaf6	Astn1	Hsd17b7	Rcsd1	Nmnat2		Tmem101	2.32077	1700040L02Rik	0.588471	Shmt1	1.33529	Spata25	-0.682797	Apol10b	-0.413472	Gpc2	1.162
Ifi203	Mpc2	Cop1	Uhmk1	Pou2f1	Lamc2		Mamstr	0.297535	Hoga1	0.662767	1700040L02Rik	0.234371	Sox18	1.39946	Smpd5	0.169401	Nostrin	2.87876
Fmn2	Mpzl1	Tnr	Gm7694	Ildr2	Lamc1		Lyve1	-0.014687	Crhr2	0.427311	Hoga1	0.166739	Tnni1	0.128481	Sntn	1.84459	Ppp1r42	1.2793
Grem2	Pou2f1	Mrps14	Spata46	Pogk	Dhx9		Cox6a2	-0.413692	Mndal	2.83705	Crhr2	1.27233	Hist1h2ap	-1.80033	Sdc1	0.431738	Slc12a8	1.71375
Zbtb18	Ildr2	Cacybp	Nos1ap	Fam78b	Rgs8		Hacl1	2.43684	Asb14	-0.667601	Mndal	2.39805	Gm867	0.128481	Klra2	0.169401	Sepp1	7.82974
Adss2	Tada1	Rabgap1l	Olfml2b	Uck2	Glul		Rhoj	1.44565	Sertad1	0.926736	Sertad1	0.908249	Ush1g	-0.165477	Ucp3	1.84459	Fam19a5	2.07991
Kif26b	Fam78b	Serpinc1	Cfap126	Aldh9a1	Cacna1e		Nos3	1.7577	Dnah2	3.5355	Tmem138	0.908249	4632434I11Rik	0.819534	Nnmt	-0.151482	Stc2	2.42359
Tfb2m	Uck2	Cenpl	Mpz	Rxrg	Ier5		Chek1	1.27793	Pnma1	-0.204327	Dnah2	3.49887	Cdc45	1.78411	Strip2	2.54453	Map3k19	3.74635
Cnst	Tmco1	Klhl20	Pcp4l1	Pbx1	Stx6		Gucy2e	1.7577	Cldn1	3.41169	Pnma1	0.988787	Cox7a1	0.64462	Itgb4	2.32535	Cd3eap	2.70094
Sccpdh	Aldh9a1	Ankrd45	Tomm40l	Rgs4	BC034090		Casp1	0.494079	Hnf1b	0.145787	Cldn1	3.16804	Nlrc5	2.2182	Ccdc135	3.07906	Gm9754	1.67146
Ahctf1	Pbx1	Prdx6	Fcer1g	Ccdc190	Xpr1		Cp	5.2228	Cenpn	-0.496109	Mob4	1.13751	Map3k6	1.78411	Ccdc78	0.262249	Gm7361	0.257282
Coq8a	Rgs4	Suco	Adamts4	Uhmk1	Lhx4		Nbeal2	3.06081	Mob4	0.662767	Chst14	0.021151	3930402G23Rik	0.372562	Smpdl3b	1.54534	Gjb1	2.96883
Psen2	Ccdc190	Myoc	B4galt3	Spata46	Qsox1		Col11a2	3.51773	Lad1	0.427311	Chek2	0.477048	Tnfsf9	-1.24657	Zfp869	-0.564779	Igf1	3.90079
Stum	Hsd17b7	Myocos	Ppox	Nos1ap	Cep350		Pnliprp2	-0.967114	Chek2	0.662767	Lrrc51	1.45352	Hist2h2ab	0.128481	Xaf1	2.66845	Adam32	1.58295
Parp1	Uhmk1	Prrc2c	Usp21	Olfml2b	Tor1aip1		Zfp951	0.494079	Kif20a	0.145787	Isl1	0.166739	Zfp947	0.514994	Olfr550	0.904692	Kifc5b	1.03432
Acbd3	Gm7694	Kifap3	Dedd	Cfap126	Tor1aip2		Ankzf1	1.56708	Lrp2bp	0.145787	Grap	1.39562	Pla1a	0.873423	Fos	3.95211	Ifi27l2a	-1.19404
Sde2	Spata46	Scyl3	Pfdn2	Pcp4l1	Tdrd5		Pla2g12a	3.17027	Lrrc51	-0.077944	Scrt2	2.52501	Meox1	-0.847396	5830403L16Rik	1.58182	Gabpa	1.7948
Lefty1	Nos1ap	Slc19a2	Nit1	Tomm40l	Axdnd1		Olfr691	-0.807626	Grap	0.51014	Adora2b	0.988787	Arhgef28	2.37587	A830031A19Rik	-0.036407	Trpv4	3.72583
Tmem63a	Olfml2b	Ccdc181	Klhdc9	Fcer1g	Tor3a		Dnah10	2.42082	Scrt2	2.7881	Gm9791	-1.44116	Mtfr2	1.2445	Cops5	2.36776	Hck	0.56514
Wdr26	Dusp12	Blzf1	Usf1	Adamts4	Fam20b		Dlx5	0.960925	Adora2b	1.59142	Ccdc126	3.03212	Setdb2	0.819534	Etnk2	0.509557	Gmip	3.19468
Lbr	Cfap126	Atp1b1	Tstd1	B4galt3	Ralgps2		Jsrp1	-0.807626	Gm17677	-2.10635	Gck	-0.423924	Lrdd	1.02397	Zfp457	1.26029	Neurl2	-0.471164
Enah	Mpz	Gpr161	Vangl2	Ppox	Tex35		Ehhadh	1.31307	Ccdc126	2.6488	9930111J21Rik2	0.531836	Lrrc10	0.128481	Psmb9	-0.036407	Lyz2	2.07991
Srp9	Pcp4l1	Dcaf6	Nhlh1	Usp21	Brinp2		Dnm1l	1.85629	Gck	0.51014	Rps2-ps6	-1.66935	Gbp4	3.35448	Bhlha9	0.845903	Vpreb1	-0.910921
Degs1	Tomm40l	Mpc2	Ncstn	Ufc1	Astn1		Fam220a	0.960925	9930111J21Rik2	2.12576	Slc37a2	2.08653	Defb11	-0.165477	Gbp2	2.85888	Atp5k	3.4537
Trp53bp2	Fcer1g	Mpzl1	Pex19	Dedd	Tnr		Gper1	0.149854	Myo1a	0.038255	Ltc4s	0.234371	Timm8a1	3.49862	Tgtp1	1.21455	Fam214b	0.965968
Capn2	Adamts4	Creg1	Dcaf8	Pfdn2	4930523C07Rik		Gimap1	-0.413692	Surf1	0.038255	5033430I15Rik	-0.140795	Acer2	3.53251	Fam187a	0.070164	Psmg3	1.7948
Susd4	Ppox	Pou2f1	Pea15a	Klhdc9	Mrps14		Ccdc173	1.97075	Slc37a2	3.0458	Galm	1.66437	Acot12	2.27936	Gm5431	1.06792	Rnf138	0.138102
Tlr5	Usp21	Ildr2	Atp1a4	Usf1	Rabgap1l		Tmem196	2.25	Ltc4s	-0.342854	Prdm1	0.477048	Muc1	0.514994	2210404O07Rik	-0.733835	Serpind1	0.65471
Disp1	Ufc1	Fam78b	Atp1a2	Tstd1	Rc3h1		Sult5a1	-0.014687	5033430I15Rik	-1.08735	Tmem101	2.7839	Scarf1	1.20301	1110059M19Rik	3.1415	Slc9a3	0.008183
Brox	Dedd	Uck2	Igsf8	Alyref2	Serpinc1		Sfxn2	0.66703	Galm	1.09718	Lyve1	0.021151	Wfdc18	-1.03322	Pvrl2	1.21455	Rdh12	0.89422
Mia3	Pfdn2	Tmco1	Pigm	Vangl2	Dars2		Ska3	-0.533436	Tmem101	1.70126	Cox6a2	-0.323246	Polg2	1.78411	Nyx	0.262249	Nanos3	-1.54663
Taf1a	Klhdc9	Aldh9a1	Cfap45	Nhlh1	Ankrd45		Srp54b	3.51018	Unc45b	0.51014	Hacl1	2.46995	Vipr2	-0.060693	Fosb	3.09176	Morn5	0.367364
Dusp10	Usf1	Mgst3	Ackr1	Ncstn	Prdx6		BC022687	1.85629	Mamstr	1.04257	Rhoj	1.95238	Nkx2-1	-0.278471	Knstrn	1.95997	Runx1	1.4391
Mtarc2	Alyref2	Rxrg	Cadm3	Pea15a	Pigc		Kcne2	3.24496	Lyve1	0.145787	Nos3	2.52501	A830005F24Rik	-1.03322	Rnase4	3.37771	Akna	3.20954
C130074G19Rik	Vangl2	Pbx1	Fmn2	Atp1a4	4930558K02Rik		Eif4ebp1	-0.533436	Cox6a2	-0.204327	Chek1	1.33529	Tex30	1.47112	Tyw5	0.845903	Myh15	0.469638
Mark1	Nhlh1	Nuf2	Grem2	Atp1a2	Dnm3		Gm13251	2.07679	Hacl1	2.63041	1810033B17Rik	-1.24419	C1s	2.84911	Cd274	1.3894	Myzap	0.818717
Rab3gap2	Ncstn	Rgs4	Rgs7	Igsf8	Vamp4		Fas	1.00457	Rhoj	1.62897	Gucy2e	1.91165	9430002A10Rik	-0.847396	5930422O12Rik	2.87367	Ppp1r3g	1.53658
Bpnt1	Pex19	Hsd17b7	Fh1	Kcnj9	Myoc		Cfh	5.77777	Nos3	1.80333	Casp1	0.234371	Gm20518	0.514994	Card10	2.50708	Col18a1	3.00334
Eprs1	Pea15a	Uhmk1	Pld5	Kcnj10	Myocos		Gas2l2	-0.200439	Chek1	1.7701	Cp	5.03566	Ttc21a	2.69303	Ly6g6f	-0.413472	Col7a1	1.162
Tgfb2	Atp1a4	Spata46	Adss2	Pigm	Prrc2c		Hif3a	3.26304	Gucy2e	2.12576	Nbeal2	3.09715	Rrad	-0.278471	Rin3	1.58182	Lhfpl5	-1.19404
Rrp15	Atp1a2	Nos1ap	Cox20	Cfap45	Fmo4		Gm8898	0.149854	Casp1	0.245858	Col11a2	3.5791	A3galt2	-0.165477	Nxph4	0.262249	Sh3tc1	1.09957
Gpatch2	Igsf8	Dusp12	Kif26b	Dusp23	Prrx1		Fam115c	0.297535	Cp	5.19482	Zfp951	0.420097	BC089491	-0.847396	Fam183b	0.070164	I830012O16Rik	0.56514
Ush2a	Kcnj9	Tomm40l	Smyd3	Ackr1	Kifap3		6430571L13Rik	0.494079	Nbeal2	3.42243	Ankzf1	1.86973	Npm2	-0.060693	Gm8923	0.845903	Ccdc169	0.367364
Kctd3	Kcnj10	Apoa2	Cnst	Mndal	Scyl3		Slc16a8	0.225584	Col11a2	3.64035	Pla2g12a	3.22734	Pm20d1	2.06451	Hsf5	2.09232	Oprl1	0.008183
Kcnk2	Pigm	Ndufs2	Sccpdh	Fmn2	Ccdc181		Ifi27	3.96156	Pnliprp2	-0.342854	Olfr691	-0.916221	Gm17655	-0.535069	Meis1	1.98743	Mss51	0.739043
Smyd2	Cfap45	Adamts4	Ahctf1	Rgs7	Blzf1		Gadd45b	2.0971	Zfp951	0.588471	Dnah10	2.52501	Adm	0.214512	Gnrh1	-1.40722	Pon3	2.91547
Prox1	Ackr1	B4galt3	Cdc42bpa	Fh1	Nme7		Inhba	2.0971	Ankzf1	1.70126	Dlx5	0.94908	Fbxo34	0.925372	Cldn19	0.653632	Hist1h3c	0.008183
Rps6kc1	Ifi203	Ppox	Coq8a	Pld5	Atp1b1		Syne3	1.53767	Pla2g12a	2.82091	Dct	-0.423924	Atp2c2	0.372562	Angpt2	1.75157	Nppc	0.008183
Angel2	Fmn2	Usp21	Psen2	Cep170	Gpr161		Rnf207	1.04694	Olfr691	-0.862263	Jsrp1	0.298973	Crybb3	-0.401072	Hist1h2ah	-2.13589	Itih3	4.49908
Ppp2r5a	Rgs7	Pfdn2	Stum	Zbtb18	Dcaf6		Chd1l	2.64424	Dnah10	2.75451	Ehhadh	1.27233	Gm11710	-0.682797	Gpc2	1.46947	Hspb1	1.7948
Ints7	Fh1	Klhdc9	Parp1	Adss	Mpc2		Serpina3n	4.77707	Dlx5	0.80078	Dnm1l	2.17525	Tex29	-0.278471	Zfp553	0.070164	Tex22	-1.19404
Lpgat1	Cep170	Arhgap30	Acbd3	Desi2	Mpzl1		Eif2ak2	3.91657	Jsrp1	-0.667601	Fam220a	0.988787	Slfn3	1.39946	Nostrin	2.75087	Scand1	1.22185
Traf5	Zbtb18	Usf1	Sde2	Hnrnpu	Pou2f1		Rnf213	5.41904	Ehhadh	1.43061	Gper1	0.166739	Tbx6	0.975515	Ppp1r42	0.169401	Ppp1r16a	0.56514
Kcnh1	Adss	Tstd1	Tmem63a	Kif26b	Dusp27		Trpt1	-1.35129	Dnm1l	1.20056	Gimap1	-0.229138	Cd300a	0.2957	Slc12a8	0.845903	Gimap4	-0.910921
Hhat	Desi2	F11r	Ephx1	Tfb2m	Ildr2		Zic1	5.08981	Fam220a	0.865132	Dhodh	0.635538	Rslcan18	1.53939	Sepp1	7.87627	Tirap	2.14318
Utp25	Hnrnpu	Alyref2	Nvl	Cnst	Tada1		Prdm9	1.50764	Gper1	0.145787	Ccdc173	1.58887	Fpgs	2.11012	Fam19a5	2.30367	Mlkl	0.008183
Camk1g	Efcab2	Vangl2	Wdr26	Sccpdh	Pogk		H2-T23	2.11712	Ptprq	0.662767	Tmem196	2.81737	Gabrr2	0.036992	Stc2	3.25881	Sdf2l1	1.94439
Plxna2	Kif26b	Nhlh1	Lbr	Ahctf1	Fam78b		Cmklr1	1.31307	Ccdc173	1.8358	Sult5a1	0.095781	Dnaaf1	-0.401072	Serpinb7	-0.413472	Sh2d3c	0.469638
Ppp1r14c	Tfb2m	Ncstn	Enah	Cdc42bpa	Uck2		Sash3	-0.413692	Tmem196	1.55287	Sfxn2	0.866229	Gm12355	-0.682797	Map3k19	3.51612	Pxdc1	0.008183
Plekhg1	Cnst	Pex19	Srp9	Coq8a	Aldh9a1		Lrrc46	-0.104575	Sfxn2	1.04257	Ska3	-0.140795	Ube2l6	2.35707	Cd3eap	2.14203	Fgd2	2.17381
Akap12	Sccpdh	Dcaf8	Degs1	Psen2	Pbx1		Arhgef5	2.45268	Ska3	-0.667601	Srp54b	2.98381	Hmgcs2	5.43772	Gm9754	1.30462	Hist1h3b	0.138102
Zbtb2	Ahctf1	Pea15a	Trp53bp2	Stum	Ccdc190		Naprt1	0.225584	Srp54b	2.91512	BC022687	2.25882	E230008N13Rik	1.16029	Gm7361	1.30462	Angptl4	1.90842
Rmnd1	Cdc42bpa	Atp1a4	Capn2	Parp1	Hsd17b7		Mybl2	0.149854	BC022687	1.62897	Kcne2	2.82835	Hist1h2ae	-0.682797	Gjb1	1.95997	Nhlh1	0.257282
Syne1	Coq8a	Igsf8	Susd4	Acbd3	Uap1		Gpr157	0.366069	Kcne2	3.41169	Eif4ebp1	-0.057551	Odf3	-0.535069	Igf1	3.8209	Zfp36	1.71375
Oprm1	Psen2	Kcnj9	Disp1	Sde2	Spata46		Slitrk6	0.869454	Eif4ebp1	0.145787	Gp5	-0.649175	Phf11b	-0.847396	Adam32	1.68605	Ido1	-0.910921
Lrp11	Stum	Kcnj10	Brox	Lefty1	Nos1ap		Kdm8	0.494079	Gp5	-0.667601	Gm13251	1.7126	Itih2	4.64417	Kifc5b	0.961179	Lrriq3	0.65471
Lats1	Parp1	Pigm	Mia3	Tmem63a	Olfml2b		Gm6169	-1.35129	Gm13251	2.36708	Fas	0.778328	Cyp39a1	2.13239	Ifi27l2a	-1.72603	Htr6	0.965968
Ginm1	Acbd3	Tagln2	Taf1a	Ephx1	Atf6		Aspg	-0.533436	Fas	1.66557	Cfh	5.64504	Gm10273	-0.278471	Piwil2	0.349481	H2-T24	0.89422
Ppil4	Sde2	Cfap45	Dusp10	Nvl	Nr1i3		Lgals3bp	3.59115	Cfh	5.66367	Gas2l2	-0.649175	Ttll6	0.581262	Gabpa	0.653632	mt-Nd3	4.47469
Zc3h12d	Lefty1	Dusp23	Mtarc2	Cnih4	Apoa2		Pgpep1l	0.297535	Hif3a	4.31177	Hif3a	2.03056	Aldh1a3	0.128481	Trpv4	2.42912	Aox3	2.87876
Tab2	Tmem63a	Ackr1	C130074G19Rik	Wdr26	Tomm40l		Ubxn10	0.771789	Gm8898	-0.077944	Gm8898	0.420097	Hgfac	0.819534	Hck	1.3894	Bbox1	2.42359
Ust	Ephx1	Fmn2	Mark1	Cnih3	Ndufs2		Ikbke	1.0881	6430571L13Rik	0.427311	Fam115c	0.298973	Gm1661	-0.165477	Gmip	3.54413	Fmo5	2.8411
Sash1	Nvl	Grem2	Rab3gap2	Lbr	Adamts4		Rgs22	2.13687	Slc16a8	0.427311	6430571L13Rik	1.10174	Nlrp3	1.11627	Glod5	0.262249	Spsb4	1.162
Samd5	Wdr26	Rgs7	Iars2	Enah	Usp21		1700037C18Rik	0.611652	Ifi27	3.59363	Slc16a8	0.584619	Gm7461	-0.535069	Neurl2	-0.413472	Fbxl8	-0.910921
Stxbp5	Lbr	Fh1	Bpnt1	Srp9	Ufc1		Grcc10	0.554063	Gm3591	-0.862263	Ifi27	4.15573	Tcea3	1.11627	Lyz2	1.75157	Cdo1	3.9809
Grm1	Enah	Akt3	Eprs1	Degs1	Dedd		Prlr	6.18233	Gadd45b	0.80078	Gm3591	0.166739	Arhgap30	2.04116	Atp5k	1.30462	Sycp2	2.23317
Utrn	Srp9	Zbtb18	Lyplal1	Fbxo28	Pfdn2		Pcsk4	-0.413692	Inhba	2.29883	Gadd45b	2.41272	Ms4a6b	1.50566	Fam214b	0.784617	Gm10335	0.89422
Zc2hc1b	Degs1	Adss	Tgfb2	Trp53bp2	Nit1		Cdh19	4.35209	Syne3	2.57377	Inhba	1.97233	1190005I06Rik	-0.535069	Psmg3	1.61741	Foxf1	0.469638
Ltv1	Fbxo28	Hnrnpu	Rrp15	Capn2	Klhdc9		Cep57	1.16705	Rnf207	0.588471	Syne3	1.39562	Nuak2	0.2957	Rnf138	-0.036407	Sec14l3	0.469638
Phactr2	Trp53bp2	Kif26b	Gpatch2	Susd4	Usf1		Tctex1d1	-0.664027	Chd1l	2.853	Rnf207	0.822948	Fkbp11	-1.03322	Serpind1	0.583392	Mtrr	0.257282
Pex3	Capn2	Smyd3	Kctd3	Tlr5	Tstd1		Il15ra	1.41363	Serpina3n	4.80145	Chd1l	2.62918	Plcd4	2.7373	Rdh12	1.93198	BC049715	0.65471
Aig1	Susd4	Tfb2m	Kcnk2	Disp1	F11r		Smad6	0.149854	Eif2ak2	4.04634	Serpina3n	4.8297	Epn3	2.70793	Nanos3	-0.413472	Mlph	0.367364
Hivep2	Disp1	Cnst	Smyd2	Brox	Alyref2		Abcc6	0.554063	Rnf213	5.59418	Eif2ak2	3.77918	Xbp1	3.66064	Morn5	-0.733835	Gm4737	1.162
Vta1	Brox	Sccpdh	Prox1	Mia3	Nhlh1		Msantd1	1.04694	Zic1	4.19144	Rnf213	5.402	Rcbtb2	2.97769	Runx1	1.30462	Tnnc1	0.56514
Cited2	Mia3	Ahctf1	Rps6kc1	Taf1a	Ncstn		Hist1h2bf	0.771789	Prdm9	1.66557	Trpt1	-1.44116	Ghsr	1.50566	Akna	3.22461	Dpep1	0.469638
Heca	Taf1a	Cdc42bpa	Angel2	Marc2	Pex19		Gm10645	-0.104575	Zfp57	0.145787	Zic1	5.43831	Zfp934	2.01742	Myh15	0.653632	Gm14403	1.162
Reps1	Marc2	Coq8a	Tatdn3	C130074G19Rik	Dcaf8		Zfp513	2.61637	H2-T23	1.70126	Prdm9	1.58887	Cxcl1	2.17593	Ppp1r3g	1.95997	Flt4	1.2793
Nhsl1	C130074G19Rik	Psen2	Nenf	Mark1	Pea15a		Tmem72	3.98354	Cmklr1	1.2496	Zfp57	-0.140795	Fut8	0.214512	Col18a1	2.44901	1700023F06Rik	-0.134605
Hebp2	Mark1	Stum	Pacc1	Rab3gap2	Atp1a4		Arc	6.46609	Sash3	-0.342854	H2-T23	2.17525	Ifi202b	-0.847396	Col7a1	1.01554	F5	6.79237
Arfgef3	Iars2	Parp1	Ppp2r5a	Iars2	Atp1a2		Drc1	2.88513	Lrrc46	-1.08735	Cmklr1	0.94908	Tm4sf19	-0.847396	Endou	1.58182	Trim12c	2.42359
Map3k5	Bpnt1	Acbd3	Ints7	Bpnt1	Igsf8		Gm4461	1.0881	Arhgef5	2.86878	Sash3	0.584619	Cebpb	1.99328	Lhfpl5	0.070164	Trim16	0.965968
Map7	Eprs	Sde2	Lpgat1	Eprs	Kcnj9		Slc38a5	1.04694	Naprt1	-0.204327	A530084C06Rik	-0.057551	Rab32	1.81198	Sh3tc1	1.5079	Tmem140	1.09957
Rpl32l	Tgfb2	Ephx1	Nek2	Tgfb2	Kcnj10		H2-D1	3.19873	Mybl2	0.245858	Tacr1	1.39562	Gm10175	-0.060693	I830012O16Rik	2.87367	Cyp2j8	-0.293092
Mtfr2	Rrp15	Nvl	Kcnh1	Rrp15	Pigm		Zfp69	-0.303129	Gpr157	0.339436	Lrrc46	-0.229138	Gm20715	0.873423	Ccdc169	0.583392	Ass1	3.6407
Ahi1	Gpatch2	Cnih4	Hhat	Gpatch2	Ackr1		Raly	1.62416	Tymp	-0.667601	Arhgef5	2.24249	Ccnb1	-0.060693	Oprl1	-0.036407	Agmat	-0.471164
Hbs1l	Esrrg	Wdr26	Sertad4	Esrrg	Cadm3		Siah3	0.431493	Kdm8	0.926736	Naprt1	1.45352	Tnnt1	-0.278471	Zfp820	0.169401	Medag	1.09957
Sgk1	Ush2a	Ccdc121	Utp25	Ush2a	Ifi213		Gm17732	1.12811	Gm6169	-0.667601	Mybl2	0.166739	Aass	4.44502	Mss51	1.30462	BC051019	-0.674351
Slc18b1	Kctd3	Lbr	Hsd11b1	Kctd3	Mndal		Gm2237	1.34737	Aspg	-0.496109	Gpr157	0.477048	Helz2	3.56563	Pon3	3.31408	Slc8a1	0.008183
Stx7	Kcnk2	Enah	G0s2	Kcnk2	Olfr419		Cox4i2	-1.59009	Lgals3bp	3.51559	Slitrk6	1.66437	Smpd5	-0.847396	Hist1h3c	-1.40722	Adam1a	3.19468
Akap7	Smyd2	Degs1	Camk1g	Smyd2	Fmn2		Mns1	0.66703	Pgpep1l	0.038255	Kdm8	1.80447	Sntn	0.036992	Nppc	-0.036407	Tmc4	2.80242
Epb41l2	Prox1	Trp53bp2	Plxna2	Prox1	Grem2		Sh3bgr	0.149854	Ubxn10	1.09718	Lgals3bp	3.60488	Sdc1	1.94377	Itih3	4.20109	Ifitm3	1.87153
Smlr1	Rps6kc1	Capn2	Cd34	Tatdn3	Rgs7		Pate2	0.431493	Ikbke	1.55287	Pgpep1l	-0.423924	Klra2	1.07086	Hspb1	1.42999	Cyp2s1	0.469638
Samd3	Angel2	Susd4	Cd46	Nenf	Fh1		Ogfod2	2.57354	Rgs22	2.20249	Ubxn10	0.477048	Ccdc60	0.128481	Tex22	-0.733835	Ribc1	-0.293092
L3mbtl3	Tatdn3	Disp1	Ppp1r14c	Ppp2r5a	Pld5		Steap2	5.09487	Tnfrsf23	0.339436	Ikbke	1.27233	Hist2h3b	0.2957	Scand1	0.904692	Igfbpl1	2.70094
Ptprk	Nenf	Brox	Iyd	Ints7	Cep170		Gm5424	2.48386	1700037C18Rik	0.145787	Rgs22	2.12268	Ucp3	-0.165477	Ppp1r16a	0.845903	Rcsd1	2.54569
Themis	Ppp2r5a	Mia3	Plekhg1	Traf5	Zbtb18		Slc26a1	0.494079	Grcc10	0.145787	1700037C18Rik	0.360806	Nnmt	2.31874	Phf11d	-0.036407	Clec5a	0.89422
Mtcl3	Ints7	Taf1a	Akap12	Rcor3	Cox20		Fam161a	3.08134	Prlr	6.56309	Grcc10	1.02743	Dmc1	0.214512	Chodl	0.349481	Slc43a3	0.138102
9330159F19Rik	Lpgat1	Dusp10	Zbtb2	Kcnh1	Hnrnpu		1700007K13Rik	0.960925	Pcsk4	-0.496109	Prlr	5.76851	Strip2	2.7373	Tirap	2.61664	Tor4a	2.14318
Rspo3	Traf5	Marc2	Rmnd1	Hhat	Kif26b		Plekhg4	0.554063	Cdh19	4.50086	Pcsk4	-0.532158	Itgb4	3.00209	Sdf2l1	2.28166	Hspa1a	3.25321
Hint3	Rcor3	C130074G19Rik	Syne1	Sertad4	Smyd3		Myh7b	0.554063	Cep57	0.865132	Cdh19	4.13376	Ccdc135	3.66064	Lat	-0.413472	Rtp4	0.89422
Ncoa7	Sertad4	Rab3gap2	Oprm1	Camk1g	Tfb2m		Nudt7	1.44565	Cda	-0.204327	Cep57	1.23979	Ccdc78	-1.03322	Fgd2	1.26029	2024-03-10	0.469638
Tpd52l1	Utp25	Iars2	Pcmt1	Plxna2	Sccpdh		Atg9b	0.66703	Il15ra	1.09718	Il15ra	1.48163	Awat2	-0.165477	Hist1h3b	-0.733835	Slc25a13	2.3717
Rnf217	Camk1g	Bpnt1	Lats1	Cd34	Ahctf1		Fancl	-0.200439	Smad6	0.51014	Smad6	0.866229	Smpdl3b	1.43574	Angptl4	1.26029	Lca5l	1.22185
Tspyl1	Plxna2	Eprs	Katna1	Cd46	Cdc42bpa		mt-Co3	6.82224	Abcc6	0.339436	Abcc6	0.420097	Zfp869	-0.401072	Zfp36	0.509557	1700016K19Rik	0.65471
Tspyl4	Cd34	Tgfb2	Ginm1	Ppp1r14c	Coq8a		Cdkn1a	1.53767	Msantd1	1.47252	Msantd1	1.39562	Xaf1	2.76607	Htr6	1.46947	Fstl3	-0.134605
Hdac2	Cd46	Rrp15	Ppil4	Plekhg1	Psen2		Plcb2	1.0881	Hist1h2bf	0.038255	Hist1h2bf	0.94908	Olfr550	0.036992	H2-T24	2.48798	Gm9945	0.367364
Marcks	Ppp1r14c	Gpatch2	Zc3h12d	Mthfd1l	Stum		Dqx1	-0.014687	Gm10645	-0.077944	Gm10645	-0.916221	Cep72	1.28483	mt-Nd3	6.81487	Iqcd	1.38778
Fyn	Iyd	Esrrg	Tab2	Akap12	Parp1		Frat2	1.0881	Zfp513	2.36708	Zfp513	2.61657	Fos	3.76412	Aox3	2.85888	Rbpms2	1.53658
Mfsd4b4	Akap12	Ush2a	Ust	Zbtb2	Lin9		Iqcg	2.25	Tmem72	4.65897	Tmem72	3.42119	5830403L16Rik	1.39946	Bbox1	2.01437	Olfr267	-1.19404
Rpf2	Zbtb2	Kctd3	Sash1	Rmnd1	Acbd3		Hist1h2ad	-0.807626	Arc	6.28149	Arc	6.65907	A830031A19Rik	1.20301	Fmo5	2.58104	Nek2	0.008183
Gtf3c6	Rmnd1	Kcnk2	Samd5	Syne1	H3f3a		Tmem17	1.83227	Drc1	2.53473	Drc1	3.37698	Cops5	2.2182	C7	-0.413472	Omp	0.739043
Amd2	Syne1	Smyd2	Stxbp5	Mtrf1l	Sde2		Zmat5	1.92605	Ptafr	0.145787	Ptafr	0.635538	Etnk2	2.80819	Spsb4	1.42999	Abhd15	0.739043
Cdk19	Mtrf1l	Prox1	Grm1	Rgs17	Lefty1		G0s2	0.72036	Gm4461	1.04257	Gm4461	0.908249	Zfp457	0.214512	Fbxl8	-0.276538	Tmem252	1.2793
Ddo	Rgs17	Nenf	Shprh	Cnksr3	Tmem63a		Ccdc108	3.63347	Slc38a5	1.55287	Slc38a5	0.732284	Psmb9	0.214512	Cdo1	3.44858	Piezo2	2.17381
Cdc40	Lrp11	Ppp2r5a	Fbxo30	Lrp11	Ephx1		Fstl4	2.40462	H2-D1	3.0733	H2-D1	3.27629	Bhlha9	0.128481	Gm7808	-1.14627	Gm20517	1.53658
Wasf1	Pcmt1	Ints7	Epm2a	Lats1	9130409I23Rik		Acot4	0.149854	Zfp69	0.145787	Samd3	-0.323246	Gbp2	2.48375	Sycp2	2.30367	Sctr	0.818717
Zbtb24	Lats1	Traf5	Utrn	Ginm1	Nvl		Zfp566	1.94857	Raly	1.66557	Raly	1.86973	Tgtp1	2.25926	Gm10335	-0.151482	Dynlt1f	0.138102
Smpd2	Ginm1	Rcor3	Sf3b5	Ppil4	Wdr26		Wdr72	0.821448	Siah3	-0.342854	Siah3	0.298973	Upk1a	-1.03322	Foxf1	0.653632	Fxn	0.469638
Cd164	Zc3h12d	Kcnh1	Zc2hc1b	Zc3h12d	Cnih3		Trim34a	1.94857	Gm17732	1.1498	Gm17732	0.298973	2210404O07Rik	-0.847396	Sec14l3	-0.413472	Parp14	3.51478
Armc2	Tab2	Sertad4	Ltv1	Tab2	Ccdc121		Abca6	2.8734	Gm2237	1.04257	Gm2237	1.27233	Plbd1	-0.401072	Mtrr	0.961179	Scnn1a	2.82189
Foxo3	Ust	Utp25	Phactr2	Ust	Lbr		A2m	3.54755	Mns1	1.1498	Cox4i2	-1.66935	1110059M19Rik	2.95288	BC049715	0.431738	Gm2840	-1.19404
Snx3	Sash1	G0s2	Fuca2	Sash1	Enah		Bean1	1.94857	Sh3bgr	-1.08735	Mns1	0.822948	Pvrl2	2.27936	Mlph	0.431738	Zfp454	2.72182
Scml4	Samd5	Camk1g	Pex3	Samd5	Srp9		Nlrc3	0.66703	Pate2	0.80078	Sh3bgr	0.021151	Nyx	0.514994	Gm4737	2.2593	Yjefn3	1.03432
Sobp	Stxbp5	Plxna2	Aig1	Stxbp5	Degs1		Trpc7	1.38088	Ogfod2	1.47252	Pate2	0.166739	Fosb	3.03793	Tnnc1	1.16731	Flt3l	1.162
Bend3	Grm1	Cd46	Hivep2	Grm1	Trp53bp2		S100a9	-1.35129	Steap2	5.40422	Ogfod2	2.74964	Knstrn	1.57235	Dpep1	0.431738	Aurka	0.138102
Mtres1	Fbxo30	Cr1l	Vta1	Fbxo30	Capn2		Apol8	0.611652	Lst1	-1.68178	Steap2	4.73072	Rnase4	5.43099	Prickle4	-0.925363	1110002L01Rik	0.367364
Prep	Epm2a	Ppp1r14c	Cited2	Epm2a	Susd4		Gm7173	2.25	Gm5424	1.89865	Lst1	-1.66935	Tyw5	0.975515	Gm14403	0.583392	Egr4	2.87876
Popdc3	Utrn	Plekhg1	Heca	Utrn	Tlr5		Sult1c2	0.494079	Slc26a1	0.51014	Gm5424	2.33782	Cd274	1.69713	Flt4	2.68532	Ccdc158	0.65471
Hace1	Sf3b5	Akap12	Reps1	Sf3b5	Disp1		Usp18	-0.104575	Fam161a	2.86878	Slc26a1	0.021151	5930422O12Rik	2.13239	1700023F06Rik	-0.925363	Frrs1	2.63644
Grik2	Ltv1	Zbtb2	Hebp2	Ltv1	Brox		Kdm5d	1.94857	1700007K13Rik	0.245858	Fam161a	2.76115	Cited1	-0.847396	F5	5.95363	Gm10076	0.65471
Gopc	Phactr2	Syne1	Map3k5	Phactr2	Mia3		Fam195a	0.554063	Plekhg4	0.985817	1700007K13Rik	1.33529	Card10	1.99328	Trim12c	3.0533	Slc16a3	0.739043
Nus1	Pex3	Myct1	Map7	Pex3	Taf1a		Map3k8	1.41363	Nudt7	1.62897	Plekhg4	0.584619	Ly6g6f	-1.24657	Trim16	2.09232	Xlr3a	0.367364
Slc35f1	Aig1	Mtrf1l	Rpl32l	Aig1	Dusp10		Sult1a1	3.35021	Atg9b	1.34294	Myh7b	0.908249	Rin3	2.97769	Cyp2j8	-0.151482	Wdr95	0.818717
Mcm9	Hivep2	Ipcef1	Mtfr2	Hivep2	Marc2		Cdh15	-0.533436	Fancl	0.145787	Nudt7	1.80447	Gm9898	-0.847396	Ass1	3.17771	Sp140	0.367364
Fam184a	Vta1	Cnksr3	Ahi1	Vta1	C130074G19Rik		P2rx6	1.50764	mt-Co3	9.78014	Atg9b	0.732284	Fam183b	1.94377	Sp6	0.653632	Rpl22	-0.471164
Man1a	Cited2	Lrp11	Hbs1l	Cited2	Mark1		Mmp19	0.149854	Cdkn1a	1.51326	Fancl	-0.229138	Gm8923	2.64736	Medag	1.11847	Cuedc1	1.2793
Msl3l2	Heca	Lats1	Sgk1	Heca	Rab3gap2		Mcm2	1.27793	Plcb2	0.80078	Xlr	-0.229138	Hsf5	1.89249	Slc8a1	0.583392	Gm8991	1.71375
Gja1	Abracl	Ginm1	Stx7	Abracl	Iars2		Serping1	2.90829	Dqx1	0.985817	mt-Co3	7.24715	Meis1	2.87576	Adam1a	4.32465	Pkhd1l1	1.71375
Smpdl3a	Reps1	Ppil4	Akap7	Reps1	Bpnt1		Cat	5.44105	Frat2	0.662767	Cdkn1a	1.75927	Gnrh1	0.514994	Tmc4	3.25881	Lgals9	1.48866
Gcc2	Hebp2	Tab2	Epb41l2	Nhsl1	Eprs		Tnfsf12	-0.104575	Iqcg	2.12576	Plcb2	1.5092	Angpt2	0.873423	Ifitm3	1.90344	Zmym5	1.2793
Ranbp2	Pex7	Ust	Smlr1	Hebp2	Tgfb2		Yars2	1.50764	Hist1h2ad	-1.08735	Frat2	1.45352	Gpc2	1.50566	Cyp2s1	1.3894	Dok3	1.48866
Sh3rf3	Map3k5	Sash1	Samd3	Arfgef3	Rrp15		Meig1	0.771789	Tmem17	1.1498	Iqcg	2.51144	Nostrin	3.12936	Igfbpl1	1.71918	Wdr86	3.51478
Septin10	Map7	Samd5	L3mbtl3	Pex7	Gpatch2		Gbp7	3.26304	Zmat5	1.7701	Hist1h2ad	-0.323246	Gad1-ps	-0.401072	Rcsd1	2.71847	Npl	-0.134605
Oit3	Rpl32l	Stxbp5	Lama2	Map3k5	Kctd3		Car8	2.63037	G0s2	0.339436	Tmem17	1.97233	Ppp1r42	0.514994	Clec5a	-0.151482	Hddc3	2.54569
Dnajb12	Mtfr2	Grm1	Ptprk	Map7	Kcnk2		Ppp1r3e	0.960925	Ccdc108	3.86939	Zmat5	2.35311	Sepp1	9.80518	Slc43a3	1.26029	Znhit2	1.71375
Ascc1	Ahi1	Fbxo30	Themis	Rpl32l	Cenpf		Wnk4	1.80784	Fstl4	2.61177	G0s2	0.635538	Fam19a5	2.25926	Tor4a	0.961179	Snai2	0.965968
Psap	Hbs1l	Epm2a	Mtcl3	Mtfr2	Smyd2		Nkx2-2	0.297535	Acot4	0.733423	Ccdc108	3.70959	Stc2	3.2463	Hspa1a	2.79816	Scn5a	3.7766
Vsir	Sgk1	Utrn	9330159F19Rik	Ahi1	Prox1		Ankrd23	1.04694	Zfp566	1.51326	Fstl4	2.01141	Map3k19	3.68345	Rtp4	2.32535	Ppt2	2.7424
Cdh23	Slc18b1	Sf3b5	Rnf146	Hbs1l	Rps6kc1		Slc52a3	-0.104575	Optc	-0.667601	Acot4	0.420097	Cd3eap	2.75176	2024-03-10	0.262249	Ttc16	1.97948
Slc29a3	Stx7	Ltv1	Rspo3	Sgk1	Angel2		Dynlrb2	0.611652	Wdr72	1.80333	Zfp566	1.78205	Gm9754	2.25926	Slc25a13	1.87431	Lag3	0.65471
Unc5b	Akap7	Phactr2	Hint3	Tbpl1	Tatdn3		Tap2	1.87992	Trim34a	2.27534	Trim34a	1.93216	E130208F15Rik	-1.03322	Lca5l	0.653632	Pkd2l2	-0.674351
Tbata	Epb41l2	Pex3	Hddc2	Slc18b1	Batf3		Zic4	3.13142	Otub2	-0.077944	Abca6	3.06964	Gm7361	0.763553	1700016K19Rik	-0.413472	Zdhhc12	1.162
Prf1	Smlr1	Aig1	Tpd52l1	Stx7	Nenf		Dnah12	2.95354	Abca6	2.57377	A2m	3.33138	Gjb1	3.01413	Fstl3	-0.276538	Spa17	1.03432
Pald1	L3mbtl3	Hivep2	Rnf217	Moxd1	Pacc1		Esrra	3.02946	A2m	3.77205	Bean1	2.33782	Igf1	5.88576	Gm9945	0.583392	Ctla2a	1.58295
Nodal	Ptprk	Vta1	Nkain2	Akap7	Ppp2r5a		Clic6	5.28607	Bean1	1.2496	Nlrc3	0.778328	Adam32	0.705311	Iqcd	-0.733835	Eaf2	1.38778
Lrrc20	Soga3	Nmbr	Rsph4a	Epb41l2	Lpgat1		Vsig10	0.611652	Nlrc3	0.733423	Trpc7	1.78205	Kifc5b	1.47112	Rbpms2	1.01554	B230216G23Rik	0.469638
Ppa1	9330159F19Rik	Heca	Rwdd1	Smlr1	Nek2		Foxc2	-0.533436	Trpc7	1.51326	S100a9	-1.0709	Ifi27l2a	-1.49704	Olfr267	0.070164	Ifit3	2.44885
Fam241b	Echdc1	Abracl	Tspyl1	Samd3	Traf5		3110009E18Rik	0.494079	S100a9	-0.667601	Apol8	0.988787	Piwil2	1.20301	Nek2	0.070164	Gm10308	-1.54663
Tspan15	Rspo3	Reps1	Tspyl4	L3mbtl3	Rcor3		Gnpda2	3.23583	Apol8	0.51014	Gm7173	1.78205	Gabpa	1.57235	Tmem252	-0.413472	Sh3kbp1	2.04721
Tacr2	Hint3	Hebp2	Hdac2	Lama2	Kcnh1		Trim5	-0.200439	Gm7173	2.45334	Sult1c2	0.021151	Cpne1	0.925372	Piezo2	2.21353	Ssfa2	0.739043
Vps26a	Ncoa7	Arfgef3	Marcks	Ptprk	Hhat		Gfod2	2.82553	Sult1c2	0.662767	Usp18	-0.532158	Trpv4	2.98994	Gm20517	2.28166	Arsi	0.257282
Kifbp	Hey2	Tnfaip3	Fyn	Soga3	Sertad4		Ddx58	3.20809	Usp18	0.427311	Kdm5d	1.78205	Hck	1.53939	Exd1	0.784617	Tmem184a	0.65471
Ddx21	Supt4b	Slc35d3	Rpf2	9330159F19Rik	Utp25		B2m	5.19952	Kdm5d	2.1518	Fam195a	0.584619	Gmip	3.35448	Sctr	0.509557	Orc6	-0.674351
Ddx50	Tpd52l1	Map3k5	Gtf3c6	Echdc1	G0s2		Nmb	0.297535	Gm17641	-0.342854	Map3k8	1.95238	Neurl2	0.128481	Acy3	0.169401	Hpn	0.469638
Ccar1	Rnf217	Map7	Amd2	Rspo3	Plxna2		4933415A04Rik	-0.200439	Fam195a	0.662767	Sult1a1	2.62918	Lyz2	4.12784	Dynlt1f	-0.733835	S100a4	0.257282
Slc25a16	Nkain2	Rpl32l	Cdk19	Hint3	Cd34		Glb1l2	1.0881	Map3k8	2.04473	Cdh15	-0.423924	Vpreb1	-1.03322	Fxn	1.42999	Socs3	0.65471
Hnrnph3	Rsph4a	Mtfr2	Ddo	Ncoa7	Cr1l		Pld5	2.43684	Sult1a1	3.82963	P2rx6	1.68869	Atp5k	4.28522	Parp14	4.49215	Oasl2	2.44885
Reep3	Rwdd1	Ahi1	Mettl24	Hey2	Ppp1r14c		Cenpo	1.94857	P2rx6	-0.204327	Mmp19	0.095781	Fam214b	0.873423	Scnn1a	2.71847	C1ra	0.257282
Jmjd1c	Tspyl1	Hbs1l	Cdc40	Hddc2	Mthfd1l		Itga10	1.56708	Mmp19	1.43061	Mcm2	1.82655	Bloc1s1	-0.165477	Gm2840	-2.13589	Gzmk	-0.471164
Nrbf2	Tspyl4	Sgk1	Wasf1	Tpd52l1	Zbtb2		Avil	0.554063	Mcm2	1.43061	Serping1	3.48506	Psmg3	1.07086	Zfp454	2.73476	Zbtb8a	1.75485
Egr2	Hdac2	Tbpl1	Ak9	Rnf217	Syne1		Gm3636	1.53767	Serping1	1.04257	Cat	5.28727	Rnf138	0.2957	Yjefn3	1.06792	Ahcy	4.33263
Ado	Marcks	Stx7	Zbtb24	Nkain2	Mtrf1l		1700010I14Rik	0.297535	Dna2	0.588471	Tnfsf12	0.360806	Serpind1	3.56563	Flt3l	2.52592	Ssc5d	1.87153
Zfp365	Fyn	Moxd1	Cd164	Rsph4a	Rgs17		Cdc14b	2.6984	Cat	5.52864	Yars2	1.68869	Slc9a3	-0.165477	Aurka	0.070164	Plekhj1	1.33456
Rtkn2	Traf3ip2	Akap7	Sesn1	Rwdd1	Lrp11		Krt19	0.366069	Tnfsf12	0.245858	Meig1	1.06507	Rdh12	1.72671	1110002L01Rik	0.961179	Cysltr1	1.03432
Ank3	Rpf2	Epb41l2	Foxo3	Tspyl1	Nup43		Rsph1	1.73196	Yars2	0.038255	Gbp7	3.1062	Nanos3	-1.24657	Slc4a11	0.349481	Pou5f2	2.07991
Ccdc6	Amd2	Smlr1	Afg1l	Tspyl4	Lats1		Ucp2	3.70135	Meig1	-0.077944	Car8	3.30016	Morn5	-0.847396	Egr4	1.93198	Myo1h	1.03432
Mrln	Cdk19	Samd3	Snx3	Hdac2	Katna1		Lcp2	1.65187	Gbp7	3.42243	Ppp1r3e	0.684722	Runx1	1.47112	Ccdc158	1.68605	Adora2a	0.008183
Fam13c	Ddo	L3mbtl3	Ostm1	Marcks	Ginm1		Igdcc3	0.72036	Car8	2.22719	Wnk4	1.8483	Akna	3.18369	Frrs1	2.58104	Igbp1b	-0.293092
Phyhipl	Cdc40	Ptprk	Sec63	Fyn	Ppil4		mt-Nd5	8.93022	Ppp1r3e	0.80078	Nkx2-2	0.584619	Myh15	1.20301	Gm10076	0.784617	Tfr2	0.367364
Bicc1	Wasf1	Soga3	Scml4	Traf3ip2	Tab2		Lrrc23	2.01411	Wnk4	2.25147	Stat5a	0.684722	Myzap	0.514994	Xlr3a	0.169401	Rnf133	0.469638
Tfam	Zbtb24	9330159F19Rik	Sobp	Rev3l	Ust		Gm17509	0.72036	Nkx2-2	-0.342854	Ankrd23	1.2065	Ppp1r3g	2.23887	Wdr95	0.904692	Sh3bp2	2.54569
Cisd1	Smpd2	Echdc1	Pdss2	Rpf2	Sash1		AU021092	0.149854	Ankrd23	1.20056	Slc52a3	0.420097	Col18a1	3.90015	Sp140	0.72061	Dnah3	3.71546
Ipmk	Ppil6	Rspo3	Bend3	Amd1	Samd5		Sntb1	2.45268	Slc52a3	-0.077944	Dynlrb2	0.94908	Col7a1	1.43574	Rpl22	0.262249	Rasip1	2.04721
Zwint	Cd164	Hint3	Mtres1	Cdk19	Stxbp5		Spag1	3.85829	Dynlrb2	0.865132	Tap2	2.01141	Lhfpl5	-0.535069	Cuedc1	1.30462	Zfp935	-0.471164
Pcdh15	Sesn1	Hey2	Qrsl1	Ddo	Adgb		Tmem121	0.366069	Tap2	1.66557	Zic4	3.07887	Sh3tc1	1.7557	Gm8991	1.75157	Shmt1	1.4391
Gnaz	Foxo3	Supt4b	Prep	Cdc40	Shprh		Card9	-0.303129	Zic4	3.31133	Dnah12	3.16804	I830012O16Rik	2.13239	Pkhd1l1	1.87431	1700040L02Rik	1.03432
Rsph14	Snx3	Tpd52l1	Hace1	Wasf1	Fbxo30		Pnpla7	1.7577	Dnah12	3.43308	Esrra	3.30016	Ccdc169	1.02397	Lgals9	2.04082	Hoga1	0.56514
Rab36	Nr2e1	Rnf217	Grik2	Zbtb24	Timm8a1		Tmem41a	-1.14645	Esrra	3.08686	Clic6	4.90686	Oprl1	1.28483	Zmym5	1.5079	Crhr2	1.97948
Bcr	Ostm1	Nkain2	Ascc3	Smpd2	Utrn		H2-Q4	0.611652	Clic6	5.74929	H2-Q2	-0.423924	Zfp820	1.16029	Dok3	2.36776	Mndal	3.13368
Specc1l	Sec63	Rsph4a	Dcbld1	Cd164	Sf3b5		Triobp	1.90317	Vsig10	0.926736	Vsig10	1.13751	Mss51	1.81198	Wdr86	2.58104	Asb14	0.138102
Adora2a	Scml4	Tspyl1	Gopc	Sesn1	Ltv1		Marveld2	0.494079	3110009E18Rik	0.733423	Foxc2	-0.229138	Pon3	3.34497	Npl	2.36776	Abcc12	0.965968
Gucd1	Sobp	Tspyl4	Nus1	Foxo3	Phactr2		Cd74	1.12811	Gnpda2	3.24032	3110009E18Rik	0.360806	Hist1h3c	-0.535069	Hddc3	2.2593	Sertad1	1.94439
Snrpd3	Pdss2	Hdac2	Slc35f1	Afg1l	Fuca2		Ttll8	1.5959	Trim5	0.245858	Gnpda2	3.18523	Nppc	0.2957	Znhit2	2.32535	Tmem138	0.367364
Lrrc75b	Qrsl1	Marcks	Asf1a	Snx3	Adat2		Fam179a	1.31307	Gfod2	2.43226	Trim5	0.021151	Itih3	6.22713	Scn5a	2.04082	Dnah2	4.5171
Susd2	Prep	Fyn	Mcm9	Ostm1	Pex3		9330101J02Rik	2.0971	Ddx58	3.66767	Gfod2	3.1062	Hspb1	1.83932	Ppt2	3.10436	Pnma1	1.162
Cabin1	Hace1	Traf3ip2	Fam184a	Sec63	Hivep2		Gm11042	-1.87643	Umodl1	0.80078	Ddx58	2.72634	Tex22	-0.278471	Shcbp1	0.845903	Cldn1	4.3394
Mif	Grik2	Rev3l	Man1a	Scml4	Vta1		Gabarapl1	0.366069	B2m	5.19482	B2m	5.05684	Scand1	1.78411	Lag3	0.784617	Mob4	1.2793
Derl3	Ascc3	Rpf2	Msl3l2	Sobp	Heca		Hist1h2af	-1.59009	Nmb	0.733423	Nmb	0.166739	Ppp1r16a	0.925372	Cnot1	0.961179	Lad1	0.739043
Chchd10	Dcbld1	Gtf3c6	Tbc1d32	Bend3	Abracl		Ier5l	-0.200439	4933415A04Rik	0.588471	4933415A04Rik	-0.323246	Phf11d	0.925372	Pkd2l2	0.784617	Chst14	0.257282
Gm867	Gopc	Slc22a16	Gja1	1700021F05Rik	Ccdc28a		Nt5dc2	1.34737	Glb1l2	1.09718	Glb1l2	0.420097	Gimap4	0.128481	Zdhhc12	-0.151482	Chek2	1.33456
Zfp280b	Nus1	Ddo	Hsf2	Cd24a	Hebp2		Vwa5b1	2.61637	Pld5	2.22719	Pld5	2.35311	Tirap	1.89249	Spa17	0.583392	Kif20a	-0.134605
Prmt2	Slc35f1	Cdc40	Lims1	Atg5	Ifngr1		Naip2	0.611652	Cenpo	2.51481	Cenpo	2.38322	Mlkl	0.214512	Ctla2a	1.46947	Lrrc51	1.71375
S100b	Mcm9	Wasf1	Ranbp2	Prep	Il22ra2		Banp	3.8343	Itga10	1.98806	Itga10	1.992	Sdf2l1	2.72269	Eaf2	1.26029	Dll3	0.257282
Dip2a	Fam184a	Mical1	Ccdc138	Grik2	Map3k5		Shq1	1.85629	Avil	-0.077944	Avil	0.684722	Pxdc1	-0.165477	Agpat2	-0.564779	Isl1	1.22185
Pcnt	Man1a	Smpd2	Sh3rf3	Ascc3	Map7		C130074G19Rik	3.46402	Gm3636	0.733423	Gm3636	2.12268	Fgd2	2.17593	B230216G23Rik	0.784617	Grap	1.162
Ybey	Msl3l2	Cd164	Septin10	Dcbld1	Rpl32l		4932438H23Rik	1.41363	1700010I14Rik	0.588471	1700010I14Rik	0.298973	Hist1h3b	-0.165477	Ifit3	3.99333	Alox12	-0.134605
Lss	Tbc1d32	Sesn1	Micu1	Gopc	Bclaf1		Pet100	2.84966	Cdc14b	2.53473	Cdc14b	2.72634	Angptl4	2.11012	Gm10308	-1.72603	Scrt2	3.13368
Ftcd	Gja1	Foxo3	Dnajb12	Nus1	Ahi1		Pdia5	1.62416	Krt19	1.51326	Rsph1	2.01141	Msc	1.20301	Sh3kbp1	2.82884	Adora2b	1.62789
Col6a2	Hsf2	Snx3	Ascc1	Slc35f1	Hbs1l		Vwa1	2.97564	Gm9972	-1.08735	Ucp2	3.76781	Zfp36	3.00209	Ssfa2	0.845903	Gm17677	-2.01427
Col6a1	Fabp7	Sec63	Psap	Asf1a	Stx7		Tnfsf10	1.67907	Rsph1	1.89865	Pex11g	-0.057551	Ido1	-1.03322	AI607873	-0.036407	Gm9791	-0.910921
Pcbp3	Smpdl3a	Scml4	Vsir	Mcm9	Ccn2		Cd302	2.81331	Ucp2	4.0041	Lcp2	1.75927	Lrriq3	0.705311	Orc6	-0.276538	Ccdc126	3.33678
Slc19a1	Gcc2	Sobp	Cdh23	Fam184a	Med23		Ppp1r15a	2.88513	Coro2a	0.865132	Igdcc3	0.778328	Htr6	1.36225	Hpn	0.169401	9930111J21Rik2	2.3717
Col18a1	Lims1	Bend3	Slc29a3	Man1a	Akap7		2024-09-05	-0.807626	C130026L21Rik	0.038255	Khdc3	-0.323246	H2-T24	1.47112	S100a4	0.583392	Myo1a	0.008183
Pofut2	Ranbp2	Prep	Unc5b	Msl3l2	Epb41l2		C030017K20Rik	1.24191	Lcp2	1.95887	mt-Nd5	9.16498	mt-Nd3	5.00866	Rad51b	-0.036407	Rps2-ps6	-0.910921
Adarb1	Sh3rf3	Grik2	Tbata	Tbc1d32	Smlr1		Gjc2	1.94857	Igdcc3	1.1498	Lrrc23	1.89084	Aox3	3.7059	Socs3	-0.564779	Surf1	-0.910921
Sumo3	Sept10	Ascc3	Prf1	Gja1	Tmem200a		Mid1	1.34737	mt-Nd5	8.42223	Gm17509	0.531836	Bbox1	3.32577	Oasl2	2.84394	Cbln3	0.008183
Lrrc3	Oit3	Dcbld1	Pald1	Hsf2	L3mbtl3		Angptl2	3.03998	Lrrc23	1.98806	AU021092	0.477048	Fmo5	4.22949	Gzmk	0.583392	Slc37a2	3.47844
Trpm2	Mcu	Gopc	Nodal	Smpdl3a	Themis		Ak9	2.26802	Gm17509	0.733423	Sntb1	2.76115	C7	1.99328	Zbtb8a	1.26029	Ltc4s	1.22185
Cfap410	Micu1	Nus1	Lrrc20	Gcc2	Soga3		Col20a1	2.3549	AU021092	0.427311	Tmem220	-0.532158	Spsb4	0.514994	Ahcy	4.27537	5033430I15Rik	-0.293092
Pfkl	Dnajb12	Slc35f1	Npffr1	Lims1	9330159F19Rik		Chdh	3.30728	Sntb1	2.38914	Spag1	3.85096	Fbxl8	-0.060693	Ssc5d	1.30462	Galm	2.29019
Icosl	Ddit4	Cep85l	Ppa1	Ranbp2	Echdc1		Map3k7cl	-0.807626	Tmem220	-0.342854	Tmem121	0.732284	Cdo1	6.00673	Plekhj1	1.21455	Prdm1	0.56514
Gatd3a	Ascc1	Fam184a	Aifm2	Sh3rf3	Rnf146		Fhod1	0.960925	Spag1	3.85362	Trim72	-0.229138	Gm7808	-0.535069	Cysltr1	0.845903	Tmem101	3.08617
Pwp2	Anapc16	Man1a	Fam241b	Sept10	Rspo3		Armc3	0.297535	Agbl1	0.339436	Card9	0.234371	Sycp2	3.17299	Pou5f2	2.16626	Unc45b	0.56514
Trappc10	Spock2	Msl3l2	Tspan15	Micu1	Cenpw		Pla2g5	0.869454	Fbxl22	0.038255	Pnpla7	1.23979	Ren1	-0.535069	Hspa1l	-0.151482	Mamstr	1.162
Cstb	Psap	Hsf2	Tacr2	Dnajb12	Hint3		Foxj1	2.61637	Tmem121	-0.862263	H2-Q4	-0.140795	Sytl3	0.128481	Myo1h	1.11847	Lyve1	-0.134605
Pdxk	Vsir	Fabp7	Vps26a	Ddit4	Ncoa7		Whrn	4.23329	Neurl3	-0.342854	Triobp	2.12268	Gm10335	0.819534	Igbp1b	-1.14627	Cox6a2	-0.293092
Syde1	Cdh23	Gcc2	Kifbp	Ascc1	Tpd52l1		Lefty1	1.27793	Pnpla7	2.32194	Marveld2	1.17242	Foxf1	0.581262	Tfr2	2.2593	Hacl1	2.3717
Or7c70	Unc5b	Lims1	Ddx21	Psap	Rnf217		Hes6	1.67907	H2-Q4	0.926736	Cd74	1.27233	Sec14l3	2.29918	Rnf133	1.06792	Rhoj	2.67976
Plpp2	Sgpl1	Sh3rf3	Ccar1	Vsir	Nkain2		Shkbp1	3.06081	Triobp	1.70126	Ttll8	1.45352	1700011I03Rik	-0.535069	Sh3bp2	2.48798	Nos3	2.86005
C2cd4c	Tbata	Sept10	Slc25a16	Cdh23	Rsph4a		Plcg2	2.45268	Cd74	0.662767	Ooep	-0.532158	Mtrr	1.60457	Dnah3	2.82884	Chek1	2.34504
Shc2	Pald1	Sowahc	Rufy2	Slc29a3	Rwdd1		Zfhx3	4.6105	Ttll8	1.38744	Fam179a	1.68869	BC049715	0.763553	Rasip1	2.30367	Gucy2e	2.31787
Tpgs1	Nodal	Oit3	Sirt1	Unc5b	Tspyl1		Kif7	1.04694	Ooep	0.80078	9330101J02Rik	1.8483	Mlph	0.975515	Zfp935	0.070164	Casp1	0.739043
Cdc34	Eif4ebp2	Mcu	Lrrtm3	Sgpl1	Tspyl4		Timm8b	-1.59009	Fam179a	0.339436	Gm11042	-1.94053	Gm4737	3.48137	Shmt1	1.78325	Cp	5.11077
Gzmm	Lrrc20	Dnajb12	Reep3	Tbata	Nt5dc1		Slc25a15	3.59115	9330101J02Rik	2.29883	Gabarapl1	0.531836	Tnnc1	0.372562	1700040L02Rik	1.54534	Nbeal2	3.92799
Hcn2	Npffr1	Ascc1	Jmjd1c	Pald1	Hdac2		Ccdc146	1.04694	Gm11042	-1.68178	Hist1h2af	-1.66935	Dpep1	-0.165477	Hoga1	1.06792	Col11a2	4.65373
Polrmt	Ppa1	Vsir	Nrbf2	Nodal	Marcks		Sod3	1.92605	Gabarapl1	-0.077944	Ier5l	0.166739	Gm14403	0.975515	Crhr2	0.653632	Pnliprp2	-1.19404
Fgf22	H2afy2	Cdh23	Egr2	Eif4ebp2	Fyn		Slc35c2	0.225584	Hist1h2af	-2.10635	Nt5dc2	0.684722	Ces2g	-0.535069	Mndal	3.3356	Zfp951	0.965968
Misp	Col13a1	Slc29a3	Ado	Lrrc20	Traf3ip2		Tmem202	-0.967114	Ier5l	0.865132	Vwa5b1	2.14041	Flt4	2.60019	Sertad1	1.61741	Ankzf1	1.67146
Ptbp1	Fam241b	Unc5b	Zfp365	Ppa1	Rev3l		Ecm1	1.94857	Nt5dc2	2.01667	Naip2	0.584619	1700023F06Rik	0.873423	Tmem138	-1.14627	Pla2g12a	3.97222
R3hdm4	Tspan15	Pcbd1	Rtkn2	Aifm2	Mfsd4b1		B230317F23Rik	1.04694	Vwa5b1	2.7714	Banp	3.81827	F5	6.70411	Dnah2	4.00008	Cd79a	-0.910921
Arid3a	Tacr2	Tbata	Arid5b	H2afy2	Cdk19		Abcc3	0.821448	Banp	4.03939	Shq1	1.91165	Scx	-1.03322	Pnma1	1.3894	Hpse2	-0.674351
Wdr18	Hk1	Pald1	Ank3	Col13a1	Ddo		C130060K24Rik	-0.200439	Shq1	1.73609	C130074G19Rik	3.70364	Trim12c	2.43081	Cldn1	3.54413	Olfr691	-0.293092
Grin3b	Supv3l1	Eif4ebp2	Ccdc6	Fam241b	Cdc40		Exosc5	1.34737	C130074G19Rik	2.8046	4932438H23Rik	1.5628	Trim16	1.11627	Hnf1b	0.431738	Dnah10	4.21976
Tmem259	Vps26a	Lrrc20	Mrln	Tspan15	Wasf1		Tcerg1l	3.13142	4932438H23Rik	2.01667	Pet100	2.89256	Tmem140	0.925372	Cenpn	0.431738	Dlx5	2.07991
Abca7	Kif1bp	Npffr1	Slc16a9	Tacr2	Fig4		Nfxl1	1.20496	Pet100	2.97466	Ripk4	-0.057551	Ass1	5.65714	Mob4	2.5629	Dct	0.89422
Arhgap45	Ddx21	Ppa1	Fam13c	Hk1	Ppil6		Zfp219	3.47182	Ripk4	-0.204327	Pdia5	1.58887	Agmat	0.514994	Cenpl	0.349481	Jsrp1	1.03432
Polr2e	Ddx50	Tysnd1	Phyhipl	Supv3l1	Cd164		Tnfrsf25	3.86422	Pdia5	1.7701	Vwa1	3.33908	Medag	1.53939	Lad1	0.72061	Lgals2	-1.54663
Gpx4	Ccar1	H2afy2	Tfam	Vps26a	Cep57l1		Isoc2a	2.28582	Vwa1	2.57377	Tnfsf10	1.78205	Slc8a1	0.2957	Chst14	0.169401	Ehhadh	2.07991
Cbarp	Rufy2	Col13a1	Ipmk	Kif1bp	Foxo3		Loxl1	1.38088	Tnfsf10	1.55287	Cd302	2.91335	Adam1a	3.38262	Chek2	1.98743	Dnm1l	2.72182
Atp5f1d	Hnrnph3	Fam241b	Pcdh15	Ddx21	Snx3		Ptrh1	-0.533436	Cd302	2.49461	Ppp1r15a	3.07887	Tmc4	2.8625	Kif20a	0.349481	BC061194	-0.293092
Midn	Herc4	Tspan15	Gnaz	Ddx50	Nr2e1		Rps27a	5.10993	Ppp1r15a	2.09925	2024-09-05	-0.423924	Ifitm3	2.84911	Lrp2bp	0.784617	Fam220a	1.48866
Cirbp	Sirt1	Tacr2	Rsph14	Ccar1	Ostm1		Ankef1	1.24191	C030017K20Rik	1.29702	Gjc2	1.95238	Cyp2s1	1.11627	Lrrc51	1.01554	Gper1	0.965968
Fam174c	Lrrtm3	Hk1	Rab36	Slc25a16	Sec63		Mfrp	3.35021	Gjc2	1.34294	Angptl2	2.82835	Ribc1	-0.401072	Grap	1.54534	Ptprq	0.65471
Efna2	Jmjd1c	Hkdc1	Bcr	Hnrnph3	Scml4		Hmga1	3.02946	Mid1	2.29883	Ak9	1.75927	Igfbpl1	1.83932	Scrt2	3.44858	Gimap1	-0.134605
Pwwp3a	Nrbf2	Supv3l1	Specc1l	Herc4	Sobp		Sardh	2.64424	Angptl2	3.01777	Gm3558	-0.323246	Rcsd1	1.81198	Adora2b	2.61664	Dhodh	1.162
Ndufs7	Egr2	Vps26a	Adora2a	Sirt1	Bend3		Fhad1	2.83765	Ak9	2.73742	Col20a1	2.46995	Clec5a	1.32406	Gm17677	-2.13589	Ccdc173	2.78269
Apc2	Ado	Kif1bp	Gucd1	Lrrtm3	Atg5		Cir1	4.59274	Col20a1	2.12576	Chdh	2.93383	Slc43a3	1.28483	Ccdc126	3.85111	Tmem196	2.70094
2310011J03Rik	Zfp365	Ddx21	Snrpd3	Jmjd1c	Prep		Alg8	2.23175	Chdh	3.43308	Map3k7cl	-0.140795	Tor4a	1.20301	Gck	0.169401	Sult5a1	-0.293092
Reep6	Rtkn2	Ccar1	Lrrc75b	Egr2	Hace1		Resp18	-0.967114	Map3k7cl	-1.08735	Fhod1	0.988787	Hspa1a	2.79429	9930111J21Rik2	1.93198	Sfxn2	1.38778
Plk5	Ank3	Slc25a16	Susd2	Ado	Grik2		Gm21685	2.86158	Fhod1	0.51014	Armc3	-0.229138	Rtp4	1.96874	Myo1a	0.431738	Ska3	-0.134605
Mex3d	Ccdc6	Rufy2	Cabin1	Zfp365	Ascc3		Dnajb1	4.76125	Armc3	1.04257	Pla2g5	0.095781	Slc25a13	3.75697	Surf1	0.262249	Srp54b	2.8411
Mbd3	Mrln	Hnrnph3	Mif	Rtkn2	Gopc		Pgap3	1.56708	Pla2g5	1.2496	Gm7276	-1.24419	Lca5l	0.64462	Slc6a16	-0.151482	BC022687	2.91547
Uqcr11	Fam13c	Atoh7	Smarcb1	Ank3	Nus1		Ydjc	1.73196	Ptch2	0.588471	Foxj1	2.56496	1700016K19Rik	0.128481	Cbln3	0.72061	Kcne2	4.31213
Tcf3	Phyhipl	Herc4	Chchd10	Ccdc6	Slc35f1		Il6ra	2.83765	Foxj1	2.45334	Ttll9	0.234371	Gm9945	1.07086	Slc37a2	3.52552	Eif4ebp1	0.138102
Rexo1	Bicc1	Sirt1	Zfp280b	Mrln	Pln		Mafk	2.68505	Sp110	0.733423	Whrn	4.32039	Iqcd	-0.401072	Ltc4s	0.349481	Gm13251	2.89723
Klf16	Tfam	Lrrtm3	Dip2a	Fam13c	Mcm9		Hao1	-0.413692	Ttll9	0.245858	Lefty1	1.27233	Rbpms2	1.39946	5033430I15Rik	-0.036407	Fas	1.38778
Abhd17a	Ube2d1	Nrbf2	Pcnt	Phyhipl	Fam184a		Gpam	3.43241	Whrn	4.08738	Hes6	1.61448	Omp	0.581262	Tlr12	-0.036407	Cfh	5.69228
Csnk1g2	Ipmk	Egr2	Ybey	Bicc1	Man1a		Kcnk6	1.78299	Lefty1	1.47252	Shkbp1	3.1062	Abhd15	0.873423	Galm	1.26029	Gas2l2	1.03432
Btbd2	Zwint	Ado	Lss	Tfam	Msl3l2		Mum1l1	2.68505	Hes6	1.29702	Plcg2	2.51144	Fblim1	0.705311	Prdm1	1.3894	Hif3a	3.47844
Mknk2	Gnaz	Zfp365	Col6a1	Ube2d1	Gja1		Mei4	0.225584	Shkbp1	2.53473	Zfhx3	4.82422	Tmem252	0.763553	Tmem182	-0.276538	Gm8898	0.965968
Mob3a	Rsph14	Rtkn2	Pcbp3	Cisd1	Serinc1		Sdpr	3.43241	Plcg2	2.6488	Kif7	0.866229	Piezo2	2.19722	Tmem101	2.42912	Fam115c	1.38778
Izumo4	Rab36	A930033H14Rik	Slc19a1	Ipmk	Fabp7		Eltd1	4.43817	Zfhx3	4.37392	Timm8b	-1.44116	Gm20517	1.99328	Unc45b	0.169401	6430571L13Rik	0.739043
Plekhj1	Bcr	Ank3	Pofut2	Gnaz	Smpdl3a		Ccdc102a	-0.104575	Kif7	1.34294	Slc25a15	3.63648	Exd1	1.16029	Mamstr	1.06792	Slc16a8	1.83367
Sf3a2	Specc1l	Mrln	Adarb1	Rsph14	Gcc2		Spag16	2.42082	Timm8b	-1.35416	Ccdc146	0.822948	Sctr	-0.682797	Lyve1	-0.413472	Srcrb4d	-0.134605
Amh	Gucd1	Fam13c	Slx9	Rab36	Lims1		Folr1	3.44038	Slc25a15	3.24032	Sod3	2.27497	Acy3	-0.682797	Cox6a2	0.431738	Ifi27	4.7934
Lsm7	Lrrc75b	Phyhipl	Pttg1ip	Bcr	Ranbp2		Rgl3	0.821448	Ccdc146	1.59142	Slc35c2	0.095781	Dynlt1f	0.64462	Hacl1	2.78257	Gm3591	0.965968
Sppl2b	Susd2	Bicc1	Sumo3	Specc1l	Ccdc138		Herc6	2.46836	Sod3	1.86757	Tmem202	-0.649175	Fxn	0.873423	Rhoj	1.68605	Gadd45b	2.20379
Timm13	Cabin1	Tfam	Lrrc3	Snrpd3	Sh3rf3		Sord	3.54015	Slc35c2	1.09718	Ecm1	1.86973	Parp14	3.79935	Nos3	2.84394	Inhba	2.39788
Lmnb2	Ddt	Gnaz	Cfap410	Lrrc75b	Sept10		Micall1	3.16065	Tmem202	-0.342854	B230317F23Rik	0.635538	Scnn1a	2.7373	Chek1	2.16626	Syne3	2.49808
Gadd45b	Mif	Rsph14	Pfkl	Susd2	Sowahc		Notch4	1.97075	Ecm1	1.38744	Abcc3	0.732284	Gm2840	-1.49704	1810033B17Rik	-0.733835	Rnf207	1.03432
Gng7	Gm867	Rab36	Gatd3a	Cabin1	Pla2g12b		Mkrn3	-0.413692	B230317F23Rik	0.80078	C130060K24Rik	-0.323246	Zfp454	3.09574	Gucy2e	2.44901	Chd1l	3.22424
Diras1	Zfp280b	Bcr	Pwp2	Ddt	Oit3		Gm5093	-1.59009	Abcc3	0.985817	Exosc5	1.33529	Yjefn3	1.32406	Casp1	1.06792	Serpina3n	5.14595
Slc39a3	Dip2a	Specc1l	Trappc10	Mif	Micu1		H2-K1	3.68132	Rhbdf2	0.245858	Tcerg1l	3.45702	Flt3l	1.28483	Cp	5.05936	Eif2ak2	4.33263
Sgta	Pcnt	Snrpd3	Agpat3	Gm867	Dnajb12		4930523C07Rik	1.34737	C130060K24Rik	-0.342854	Nfxl1	1.42486	Aurka	-0.682797	Nbeal2	3.85111	Rnf213	5.87577
Thop1	Mcm3ap	Lrrc75b	Rrp1	Zfp280b	Ddit4		Lepre1	2.97564	Exosc5	1.43061	Zfp219	3.33908	1110002L01Rik	0.705311	Col11a2	3.95211	Zic1	6.55127
Map2k2	Ftcd	Susd2	Pdxk	Dip2a	Ascc1		Sik1	4.19141	Tcerg1l	2.66697	Tnfrsf25	3.82925	Slc4a11	1.2445	Zfp951	1.16731	Prdm9	2.04721
Zbtb7a	Col6a2	Cabin1	Syde1	Pcnt	Anapc16		Tmem8b	2.54426	Zfp219	3.42243	Isoc2a	2.45586	Egr4	2.41273	Tmem156	-0.151482	Zfp57	1.22185
Pias4	Col6a1	Ddt	Plpp2	Mcm3ap	Spock2		Egr1	6.61784	Tnfrsf25	4.24684	Loxl1	1.95238	Bpifc	-0.060693	Ankzf1	2.71847	H2-T23	2.76268
Nmrk2	Pcbp3	Mif	C2cd4c	Ybey	Chst3		Acox2	-0.104575	Isoc2a	2.32194	Ptrh1	0.234371	Ccdc158	0.581262	Pla2g12a	3.75852	Cmklr1	1.94439
Matk	Slc19a1	Derl3	Shc2	Ftcd	Psap		Ddx11	0.297535	Ptrh1	0.865132	Rps27a	6.11537	Frrs1	1.60457	Cd79a	-1.14627	Sash3	0.008183
Mrpl54	Pofut2	Gm867	Tpgs1	Col6a2	Vsir		Gstt3	0.494079	Rps27a	4.81373	Ankef1	1.7126	Gm10076	1.53939	Olfr691	-0.036407	Lrrc46	0.257282
Cactin	Adarb1	Zfp280b	Cdc34	Col6a1	Cdh23		Hspa5	7.86188	Mfrp	4.13384	Mfrp	2.71455	Slc16a3	0.705311	Dnah10	2.61664	Arhgef5	3.14918
Gipc3	Fam207a	S100b	Hcn2	Pcbp3	Unc5b		Slc5a7	0.611652	Hmga1	2.73742	Hmga1	3.38445	Wdr95	0.819534	Dlx5	1.34763	Naprt1	0.367364
Mfsd12	Pttg1ip	Dip2a	Polrmt	Slc19a1	Tbata		Dusp5	4.0159	Sardh	2.47412	Sardh	2.71455	Sp140	1.07086	Jsrp1	-0.036407	Mybl2	0.469638
Tektip1	Sumo3	Pcnt	Fgf22	Pofut2	Nodal		Tcf7l1	1.34737	Fhad1	3.43308	Fhad1	2.59099	Rpl22	0.445535	Ehhadh	-0.036407	Gpr157	1.2793
Gm48552	Cfap410	Mcm3ap	Misp	Adarb1	Eif4ebp2		Irak3	0.431493	Cir1	4.53093	Cir1	4.50971	Cuedc1	2.17593	Dnm1l	2.11739	Slitrk6	0.469638
Smim24	Pfkl	Ybey	Med16	Fam207a	Npffr1		Glipr1	-0.104575	Alg8	2.22719	Alg8	2.65409	Gm8991	1.53939	Fam220a	2.28166	Tymp	0.008183
Nfic	Icosl	Lss	R3hdm4	Pttg1ip	Ppa1		Rbks	1.62416	Gm21685	2.93024	Resp18	-0.776528	Pkhd1l1	1.69713	Gper1	1.01554	Kdm8	2.20379
Celf5	Gatd3a	Ftcd	Arid3a	Sumo3	Tysnd1		Ctsc	3.86422	Dnajb1	4.45456	Gm21685	3.69166	Lgals9	3.23605	Myocd	0.784617	Gm6169	-1.54663
Ncln	Trappc10	Col6a2	Wdr18	Ube2g2	H2afy2		Gipr	-0.104575	Pgap3	1.43061	Dnajb1	4.94773	Zmym5	1.69713	Ptprq	0.72061	Lgals3bp	4.03194
Gna11	Agpat3	Col6a1	Grin3b	Cfap410	Fam241b		Calcrl	4.36471	Ydjc	1.86757	Pgap3	1.63964	Dok3	2.01742	Dhodh	1.16731	Pgpep1l	1.162
Tle5	Rrp1	Pcbp3	Tmem259	Pfkl	Tspan15		Baiap2l1	1.5959	Il6ra	2.61177	Ydjc	1.97233	Wdr86	2.61608	Ccdc173	2.2593	Ubxn10	2.17381
Tle2	Cstb	Slc19a1	Gpx4	Icosl	Tacr2		Ccdc159	2.97564	Mafk	2.70263	Il6ra	2.64169	Npl	1.63609	Tmem196	3.30319	Ikbke	2.01374
Tle6	Pdxk	Pofut2	Sbno2	Trappc10	Hk1		Mobp	5.84834	Hao1	-0.077944	Mafk	2.70266	Hddc3	2.37587	Sult5a1	0.169401	Rgs22	3.11802
Sirt6	Ilvbl	Adarb1	Cbarp	Agpat3	Vps26a		Steap1	2.0971	Gpam	3.5841	Gpam	3.24384	Znhit2	1.69713	Sfxn2	1.26029	Tnfrsf23	-0.134605
Gm10778	Syde1	Fam207a	Atp5f1d	Rrp1	Kif1bp		Rsph4a	3.11159	Nup210l	0.339436	Kcnk6	1.75927	Snai2	1.7557	Ska3	0.070164	1700037C18Rik	0.65471
Zfp433	Ccdc105	Pttg1ip	Midn	Cstb	Ddx21		Gpr56	1.0881	Kcnk6	1.92907	Mum1l1	2.85007	Scn5a	1.02397	Srp54b	3.4682	Grcc10	1.162
Hcfc2	Olfr1356	Sumo3	Cirbp	Pdxk	Ddx50		Tysnd1	0.431493	Mum1l1	2.36708	Mei4	0.908249	Ppt2	2.75176	BC022687	2.95937	Prlr	7.38241
Nfyb	2610008E11Rik	Cfap410	Fam174c	Ilvbl	Hnrnph3		Ghr	4.50048	Sdpr	3.87722	Sdpr	3.20222	Shcbp1	0.819534	Pabpc4l	1.11847	Cdh19	5.02938
Txnrd1	Plpp2	Pfkl	Efna2	Syde1	Herc4		Xkr6	4.91784	Eltd1	4.17884	Eltd1	4.52667	Pkd2l2	0.925372	Kcne2	2.82884	Cep57	1.162
Eid3	Mier2	Icosl	Pwwp3a	Olfr1356	Sirt1		Cers1	1.38088	Lipc	-0.862263	Lipc	-0.916221	Zdhhc12	1.96874	Eif4ebp1	0.431738	Cda	-1.19404
Chst11	C2cd4c	Gatd3a	Ndufs7	Plpp2	Lrrtm3		Wnt3	0.869454	Ccdc102a	-0.667601	Ccdc102a	-0.649175	Spa17	0.64462	Gp5	0.070164	Tctex1d1	0.138102
Slc41a2	Shc2	Pwp2	Gamt	Mier2	Reep3		Ptgdr	-0.413692	Spag16	2.68491	Spag16	2.01141	Ctla2a	1.43574	Gm13251	2.48798	Il15ra	1.53658
Nopchap1	Tpgs1	Trappc10	Rps15	C2cd4c	Jmjd1c		Efcab4a	-0.533436	Folr1	3.54535	Folr1	3.09715	Eaf2	0.445535	Fas	2.34671	Smad6	0.818717
Appl2	Cdc34	Agpat3	Apc2	Shc2	Nrbf2		Sp8	1.70576	Rgl3	1.09718	Rgl3	0.822948	Agpat2	0.975515	Cfh	5.47032	Msantd1	1.83367
1500009L16Rik	Gzmm	Rrp1	2310011J03Rik	Tpgs1	Zfp365		Csrnp1	2.0971	Herc6	2.53473	Herc6	2.49774	B230216G23Rik	1.57235	Gas2l2	-0.564779	Hist1h2bf	0.257282
Nuak1	Hcn2	Pdxk	Reep6	Cdc34	Rtkn2		Grk4	2.55898	Sord	3.41169	Sord	3.82377	Ifit3	2.91483	Hif3a	4.61166	Gm10645	0.89422
Ckap4	Polrmt	Ilvbl	Plk5	Hcn2	Cabcoco1		Atad2	2.46836	Micall1	3.42243	Micall1	3.61761	Wnt9b	-0.060693	Gm8898	0.961179	Zfp513	3.30946
Polr3b	Rnf126	Syde1	Mex3d	Polrmt	Ank3		Gm9989	0.297535	Spc25	-0.077944	Notch4	2.03056	Sh3kbp1	1.36225	Fam115c	0.070164	Tmem72	5.29617
Rfx4	Misp	Olfr1356	Mbd3	Rnf126	Ccdc6		Fbxo47	0.149854	Notch4	2.25147	Mkrn3	-0.532158	Ssfa2	0.2957	6430571L13Rik	1.26029	Ccdc67	0.65471
Ric8b	Cfd	2610008E11Rik	Uqcr11	Misp	Mrln		Noxred1	1.24191	Mkrn3	-0.342854	H2-K1	3.72731	Arsi	0.036992	Srcrb4d	-0.413472	Arc	7.52656
Tmem263	Med16	Mier2	Tcf3	Cfd	Fam13c		Scp2	6.1291	Gm5093	-1.35416	4930523C07Rik	1.30415	AI607873	0.925372	Ifi27	4.4032	Cdhr4	0.257282
Abtb3	R3hdm4	C2cd4c	Atp8b3	R3hdm4	Phyhipl		Rph3al	1.16705	H2-K1	3.41169	Lepre1	3.051	Orc6	0.036992	Gm3591	-0.733835	Drc1	3.67322
Pwp1	Arid3a	Shc2	Rexo1	Wdr18	Tfam		Cyp4f17	0.431493	4930523C07Rik	0.985817	Sik1	4.16442	Hpn	1.2445	Gadd45b	2.66845	Rhbdd3	0.008183
Rtcb	Wdr18	Tpgs1	Klf16	Tmem259	Ube2d1		Fau	4.96556	Lepre1	2.45334	Tmem8b	2.42724	S100a4	0.036992	Inhba	2.71847	Ptafr	0.818717
Fbxo7	Grin3b	Cdc34	Abhd17a	Arhgap45	Ipmk		Wdr96	2.94236	Sik1	3.92328	Egr1	6.8314	Socs3	0.445535	Syne3	2.88831	Gm4461	0.89422
Timp3	Tmem259	Gzmm	Csnk1g2	Polr2e	Zwint		Tcf15	-1.14645	Tmem8b	2.7881	Lgr6	0.584619	Oasl2	2.41273	Rnf207	1.75157	Slc38a5	1.94439
Syn3	Abca7	Hcn2	Btbd2	Gpx4	Pcdh15		Enkd1	1.31307	Egr1	6.2859	Ddx11	0.360806	C1ra	2.87576	Chd1l	3.55334	H2-D1	3.96348
Hsp90b1	Polr2e	Polrmt	Mknk2	Sbno2	Gnaz		Mrpl42	-0.303129	Lgr6	0.51014	Gstt3	0.477048	Gzmk	0.2957	Serpina3n	4.65083	Samd3	0.367364
Nt5dc3	Gpx4	Rnf126	Mob3a	Cbarp	Rab36		Ccdc114	2.21327	Acox2	0.427311	Hspa5	7.77261	Zbtb8a	2.39442	Eif2ak2	4.88784	Zfp69	0.138102
Gnptab	Sbno2	Misp	Izumo4	Atp5d	Bcr		Mvb12a	2.40462	Ddx11	1.04257	Slc5a7	0.420097	Ahcy	5.52027	Rnf213	6.46172	Raly	2.29019
Sycp3	Cbarp	Cfd	Plekhj1	Midn	Specc1l		Tas2r108	-0.807626	Gstt3	0.427311	Dusp5	3.63648	Ssc5d	2.11012	Trpt1	-0.276538	Siah3	0.367364
Chpt1	Atp5d	R3hdm4	Sf3a2	Cirbp	Adora2a		Ccdc62	2.13687	Hspa5	7.85667	Tcf7l1	1.13751	Plekhj1	0.763553	Zic1	5.24429	Gm17732	1.87153
Arl1	Midn	Kiss1r	Amh	1600002K03Rik	Snrpd3		Tfap4	0.554063	Slc5a7	0.662767	Irak3	0.021151	Cysltr1	1.36225	Prdm9	2.19009	Gm2237	1.97948
Utp20	Cirbp	Wdr18	Lsm7	Efna2	Lrrc75b		Gm973	3.03998	Dusp5	4.19144	Glipr1	-0.649175	Pou5f2	2.01742	Zfp57	0.349481	Prtn3	-0.910921
Bltp3b	1600002K03Rik	Tmem259	Sppl2b	Ndufs7	Susd2		Olfr558	-0.413692	Tcf7l1	1.29702	Rbks	1.27233	Myo1h	0.975515	H2-T23	2.28166	Cox4i2	-0.910921
Anks1b	Efna2	Polr2e	Timm13	Gamt	Cabin1		Olfr539	-0.664027	Irak3	0.145787	Ctsc	3.97477	Adora2a	0.514994	Cmklr1	1.54534	Mns1	1.53658
Apaf1	Ndufs7	Gpx4	Lmnb2	Rps15	Smarcb1		Phyhd1	0.149854	Glipr1	0.038255	Gipr	0.166739	Igbp1b	-0.278471	Sash3	0.349481	Sh3bgr	0.65471
Slc25a3	Gamt	Sbno2	Gadd45b	Apc2	Gm867		Mab21l1	0.069928	Rbks	1.34294	Calcrl	4.30081	Tfr2	2.67796	A530084C06Rik	0.070164	Pate2	1.22185
Tmpo	Rps15	Cbarp	Gng7	2310011J03Rik	Zfp280b		Slc13a4	4.43419	Ctsc	3.45415	Baiap2l1	1.23979	Rnf133	0.128481	Tacr1	0.845903	Ogfod2	2.86005
Cfap54	Apc2	Atp5d	Diras1	Reep6	S100b		Uimc1	2.23175	Calcrl	4.35723	Ccdc159	3.27629	Sh3bp2	1.89249	Lrrc46	-1.14627	Steap2	5.87344
Cdk17	2310011J03Rik	Midn	Slc39a3	Plk5	Dip2a		P2ry6	0.494079	Baiap2l1	2.09925	Mobp	5.54537	Dnah3	1.83932	Arhgef5	2.98684	Lst1	-0.471164
Elk3	Reep6	Cirbp	Sgta	Mex3d	Pcnt		Wdr13	2.73773	Ccdc159	3.17835	Steap1	1.61448	Rasip1	2.39442	Naprt1	1.34763	Gm5424	2.17381
Lta4h	Plk5	1600002K03Rik	Thop1	Mbd3	Ybey		Bcor	4.56385	Mobp	6.24719	Rsph4a	3.13303	Zfp935	0.214512	Mybl2	0.961179	Slc26a1	0.65471
Metap2	Mex3d	Efna2	Map2k2	Uqcr11	Col6a1		Dlx6	1.5959	Steap1	2.6488	Gpr56	1.02743	Shmt1	2.69303	Gpr157	1.06792	Fam161a	3.47844
Fgd6	Mbd3	Ndufs7	Zbtb7a	Tcf3	Pofut2		Stra13	1.62416	Rsph4a	3.51559	Tysnd1	0.360806	1700040L02Rik	-0.060693	Slitrk6	2.30367	1700007K13Rik	1.94439
Nr2c1	Uqcr11	Gamt	Pias4	Atp8b3	Adarb1		Epor	0.297535	Gpr56	0.926736	Ghr	4.58289	Hoga1	1.11627	Kdm8	1.58182	Plekhg4	1.62789
Ndufa12	Tcf3	Dazap1	Nmrk2	Rexo1	Fam207a		Galnt15	1.85629	Tysnd1	0.662767	Xkr6	4.5534	Crhr2	1.69713	Gm6169	0.070164	Myh7b	0.65471
Plxnc1	Atp8b3	Rps15	Atcay	Klf16	Sumo3		Atp5l	0.771789	Ghr	4.20394	Cers1	1.73612	Mndal	3.48137	Lgals3bp	3.95906	Nudt7	2.29019
Mrpl42	Rexo1	Apc2	Matk	Abhd17a	Lrrc3		Slc14a2	-0.200439	Xkr6	5.24102	Wnt3	-0.140795	Sertad1	0.873423	Pgpep1l	-0.036407	Atg9b	1.58295
Eea1	Klf16	2310011J03Rik	Mrpl54	Csnk1g2	Cfap410		Neurod2	5.78717	Ccl21a	-1.68178	Ptgdr	0.166739	Tmem138	1.96874	Ubxn10	1.06792	Fancl	0.56514
Btg1	Abhd17a	Reep6	Apba3	Btbd2	Pfkl		Col4a4	1.16705	Cers1	0.145787	Sp8	2.19236	Dnah2	4.21912	Ikbke	2.48798	Xlr	0.65471
Atp2b1	Csnk1g2	Plk5	Cactin	Mknk2	Icosl		Bok	3.82215	Wnt3	1.2496	Sla2	-0.423924	Pnma1	1.11627	Rgs22	2.85888	mt-Co3	7.59109
Poc1b	Btbd2	Mex3d	Tektip1	Mob3a	Gatd3a		Caps2	0.431493	Efcab4a	-0.496109	Csrnp1	2.57803	Cldn1	3.96983	Tnfrsf23	0.72061	Cdkn1a	2.54569
Cep290	Mob3a	Mbd3	Gm48552	Izumo4	Pwp2		Klf4	2.11712	Sp8	0.145787	Grk4	2.71455	Mob4	0.128481	1700037C18Rik	1.26029	Plcb2	1.62789
Tmtc2	Izumo4	Uqcr11	Smim24	Ap3d1	Trappc10		Errfi1	5.72493	Csrnp1	1.47252	Atad2	2.57803	Lad1	0.763553	Grcc10	0.583392	Dqx1	0.89422
Ccdc59	Ap3d1	Tcf3	Nfic	Dot1l	Agpat3		Ttc34	0.554063	Grk4	3.01777	Gm9989	0.298973	Chst14	0.372562	Prlr	6.52399	Frat2	1.22185
Ppfia2	Dot1l	Atp8b3	Celf5	Plekhj1	Rrp1		Ttr	10.3185	Atad2	2.25147	Fbxo47	0.584619	Chek2	-0.535069	Pcsk4	0.070164	Iqcg	3.35025
Ppp1r12a	Plekhj1	Rexo1	Ncln	Sf3a2	Cstb		Jdp2	3.50259	Gm9989	0.427311	Noxred1	0.866229	Kif20a	-0.165477	Cdh19	4.89872	Hist1h2ad	0.138102
Brcc3dc	Sf3a2	Klf16	Gna11	Amh	Olfr1356		Cstad	0.494079	Fbxo47	-0.667601	Scp2	6.26537	Lrp2bp	0.214512	Cep57	2.32535	Tmem17	1.67146
Syt1	Amh	Abhd17a	Tle5	Lingo3	Mier2		Rilp	0.554063	Noxred1	1.1498	Rph3al	1.53625	Lrrc51	1.7557	Cda	0.262249	Zmat5	2.70094
Nav3	Lingo3	Scamp4	Tle2	Lsm7	C2cd4c		Gng10	-1.14645	Scp2	5.97383	Cyp4f17	0.234371	Isl1	-0.165477	Il15ra	1.90344	G0s2	1.22185
Osbpl8	Lsm7	Csnk1g2	Tle6	Sppl2b	Shc2		Spata32	-0.664027	Rph3al	0.985817	Fau	4.77113	Grap	1.7557	Smad6	1.30462	Ccdc108	4.8702
Phlda1	Sppl2b	Btbd2	Sirt6	Timm13	Tpgs1		Mlf1ip	1.12811	Cyp4f17	1.29702	Wdr96	2.89256	Scrt2	3.50717	Abcc6	1.01554	Dnah7a	2.29019
Kcnc2	Timm13	Mknk2	Gm10778	Lmnb2	Cdc34		Mamdc4	0.771789	Fau	5.17274	Papln	0.360806	Adora2b	1.36225	Msantd1	2.14203	Fstl4	2.98619
Atxn7l3b	Lmnb2	Mob3a	Zfp938	Gadd45b	Gzmm		Gm17334	-0.807626	Cldn9	-1.08735	Tcf15	-1.24419	Gm17677	-2.18481	Hist1h2bf	1.11847	Acot4	0.739043
Rab21	Gadd45b	Izumo4	Hcfc2	Gng7	Hcn2		Calml4	2.46836	Wdr96	3.28804	Enkd1	1.58887	Gm9791	-1.80033	Gm10645	-1.14627	Zfp566	2.23317
Tmem19	Gng7	Ap3d1	Nfyb	Diras1	Polrmt		Tm6sf2	1.70576	Enkd1	0.339436	Mrpl42	-0.323246	Ccdc126	3.49862	Zfp513	3.01379	Wdr72	2.17381
Thap2	Diras1	Dot1l	Txnrd1	Slc39a3	Rnf126		H6pd	3.17027	Mrpl42	-0.077944	Ccdc114	2.01141	Gck	1.63609	Tmem72	4.0135	Trim34a	2.07991
Zfc3h1	Slc39a3	Plekhj1	Eid3	Sgta	Palm		Mad1l1	3.06081	Ccdc114	2.12576	Mvb12a	2.65409	9930111J21Rik2	2.39442	Arc	6.98798	Otub2	0.65471
Ptprr	Sgta	Sf3a2	Chst11	Thop1	Misp		Hspb8	3.4244	Mvb12a	1.7701	Tas2r108	-0.776528	Myo1a	0.763553	Cdhr4	-0.413472	Abca6	2.91547
Ptprb	Thop1	Amh	Slc41a2	Map2k2	Plppr3		Nmi	1.38088	Ccdc62	2.34469	Ccdc62	2.10472	Surf1	0.445535	Drc1	3.44858	A2m	4.8702
Cnot2	Map2k2	Lsm7	Nopchap1	Zbtb7a	Cfd		Ccdc81	1.00457	Tfap4	-0.342854	Tfap4	1.10174	Pde6g	-0.401072	Ptafr	0.653632	Bean1	2.26196
Myrfl	Zbtb7a	Sppl2b	Appl2	Pias4	Med16		Fam46a	3.66101	Gm973	2.75451	Gm973	3.24384	Bst1	0.372562	Gm4461	1.3894	Nlrc3	1.58295
Rab3ip	Pias4	Timm13	1500009L16Rik	Nmrk2	R3hdm4		Cmtr1	1.7577	Olfr558	0.662767	Olfr539	-1.44116	Slc37a2	2.9403	Slc38a5	1.06792	Trpc7	1.4391
Lrrc10	Nmrk2	Lmnb2	Nuak1	Atcay	Arid3a		Spata24	1.04694	Olfr539	-0.077944	Phyhd1	0.584619	Ltc4s	0.372562	H2-D1	3.30319	S100a9	-0.910921
Cct2	Atcay	Gadd45b	Ckap4	Zfr2	Wdr18		Draxin	0.431493	Phyhd1	0.588471	Mab21l1	0.095781	5033430I15Rik	0.514994	Samd3	-0.036407	Apol8	0.818717
Frs2	Zfr2	Gng7	Rfx4	Matk	Grin3b		Pgm5	2.3034	Slc13a4	4.44932	Slc13a4	4.3701	Galm	2.29918	Zfp69	0.070164	Gm7173	3.11802
Yeats4	Matk	Diras1	Ric8b	Mrpl54	Tmem259		Rorc	1.0881	Uimc1	2.09925	Uimc1	2.04946	Tmem101	3.41932	Raly	2.61664	Sult1c2	0.56514
Cpsf6	Mrpl54	Slc39a3	Tmem263	Apba3	Abca7		Chst5	-0.807626	P2ry6	0.427311	P2ry6	0.298973	Unc45b	1.02397	Siah3	1.06792	Usp18	0.138102
Mdm2	Pip5k1c	Sgta	Cry1	Pip5k1c	Arhgap45		Ckap2l	-0.014687	Wdr13	3.2524	Wdr13	2.39805	Mamstr	1.20301	Gm17732	1.81425	Kdm5d	1.67146
Slc35e3	Cactin	Thop1	Abtb3	Cactin	Gpx4		Cd163	0.611652	Bcor	3.9157	Bcor	4.84871	Lyve1	1.63609	Gm2237	2.09232	Fam195a	0.818717
Rap1b	4930404N11Rik	Map2k2	Rtcb	Tbxa2r	Sbno2		Gpr25	1.47698	Dlx6	0.865132	Dlx6	1.8483	Cox6a2	0.581262	Mns1	0.904692	Map3k8	2.39788
Mdm1	Dohh	Zbtb7a	Fbxo7	Gipc3	Stk11		Atp11c	5.24572	Gpr149	-0.077944	Gpr149	0.095781	Hacl1	3.95741	Sh3bgr	-0.276538	Sult1a1	3.57338
Dyrk2	Smim24	Pias4	Timp3	Mfsd12	Cbarp		Stac3	1.31307	Stra13	1.1498	Stra13	1.95238	Rhoj	2.56787	Pate2	1.34763	Cdh15	-0.471164
Grip1	Celf5	Dapk3	Syn3	4930404N11Rik	Atp5d		Ccdc141	5.34669	Epor	0.145787	Epor	0.298973	Nos3	2.56787	Ogfod2	2.88831	P2rx6	2.3717
Helb	Ncln	Nmrk2	Hsp90b1	Dohh	Midn		Stk10	2.7506	Galnt15	2.17737	Tbc1d10c	-0.916221	Chek1	1.91835	Steap2	5.71168	Mmp19	1.09957
Tmbim4	Gna11	Atcay	Nt5dc3	Smim24	Cirbp		Lyzl4	0.72036	Atp5l	0.662767	Galnt15	1.61448	Gucy2e	2.98994	Gm5424	2.04082	Mcm2	2.56892
Llph	Tle2	Zfr2	Ascl1	Nfic	1600002K03Rik		Slc38a3	4.98203	Slc14a2	-0.342854	Atp5l	0.988787	Casp1	1.07086	Slc26a1	0.653632	Fanci	0.469638
Lemd3	Tle6	Matk	Gnptab	Celf5	Efna2		Zfand2b	2.45268	Neurod2	5.98654	Slc14a2	-0.140795	Cp	6.71338	Fam161a	3.37771	Serping1	3.36359
Tbc1d30	Sirt6	Mrpl54	Sycp3	Ncln	Pwwp3a		Prrg4	1.34737	Col4a4	1.38744	Neurod2	5.61045	Nbeal2	3.90662	1700007K13Rik	0.653632	Cat	5.68167
Gns	Gm10778	Apba3	Chpt1	Gna15	Ndufs7		Tnfrsf14	-0.533436	Bok	3.62184	Col4a4	1.82655	Col11a2	4.13337	Plekhg4	1.61741	Tnfsf12	1.2793
Tbk1	Zfp433	Cactin	Arl1	Gna11	Gamt		Gna14	0.069928	Klf4	1.89865	Bok	3.88292	Pnliprp2	0.925372	Nudt7	2.14203	Yars2	1.7948
Xpot	Zfp938	Tbxa2r	Utp20	Tle2	Dazap1		Acot5	0.431493	Errfi1	5.90853	Caps2	0.684722	Zfp951	1.28483	Atg9b	1.71918	Meig1	1.162
Kics2	Hcfc2	Gipc3	Slc5a8	Sirt6	Rps15		Cwc27	3.70135	Ttr	10.7179	Klf4	2.12268	Ankzf1	2.58412	Fancl	-0.151482	Gbp7	3.65162
Srgap1	Nfyb	Hmg20b	Slc17a8	Ankrd24	Apc2		2410131K14Rik	4.18668	Jdp2	3.4954	Errfi1	5.50315	Pla2g12a	3.5819	Xlr	-0.733835	Car8	2.56892
Rxylt1	Txnrd1	Mfsd12	Actr6	Gm10778	2310011J03Rik		Vegfa	5.41298	Cstad	0.588471	Ttc34	0.360806	Lrrc39	0.763553	mt-Co3	10.4776	Ppp1r3e	1.38778
Mon2	Chst11	4930404N11Rik	Bltp3b	Zfp433	Reep6		0610010K14Rik	-0.104575	Rilp	1.09718	Ttr	9.9897	Olfr691	-0.682797	Cdkn1a	2.16626	Wnk4	2.3717
Atp23	Slc41a2	Dohh	Anks1b	Zfp938	Mex3d		Gm13152	2.03531	Gng10	-1.35416	Jdp2	3.59205	Dnah10	2.01742	Plcb2	1.84459	Nkx2-2	0.469638
Ctdsp2	Appl2	Smim24	Apaf1	Hcfc2	Mbd3		Dgkk	1.47698	Spata32	0.145787	Cstad	1.10174	Gm21738	-1.49704	Ttc6	0.583392	Stat5a	1.62789
Marchf9	1500009L16Rik	Celf5	Slc25a3	Nfyb	Uqcr11		Cited4	-1.35129	Emid1	0.145787	Rilp	0.021151	Dlx5	1.07086	Dqx1	0.653632	Ankrd23	1.90842
Tspan31	Nuak1	Ncln	Tmpo	Txnrd1	Tcf3		Dhrs11	1.04694	Mlf1ip	1.20056	Gng10	-0.649175	Jsrp1	-0.535069	Frat2	1.06792	Slc52a3	0.818717
Agap2	Ckap4	Gna15	Cfap54	Chst11	Atp8b3		Harbi1	2.17557	Mamdc4	0.733423	Mlf1ip	1.27233	Ehhadh	2.76607	Iqcg	2.75087	Dynlrb2	1.97948
B4galnt1	Rfx4	Gna11	Cdk17	Slc41a2	Rexo1		Htr1f	1.99259	Gm17334	-1.08735	Mamdc4	1.06507	Dnm1l	2.51799	Hist1h2ad	-1.72603	Tap2	2.61428
Arhgef25	Ric8b	Tle2	Elk3	D10Wsu102e	Abhd17a		Tceanc2	3.98354	Calml4	2.72013	Gm17334	-0.140795	BC061194	-0.278471	Tmem17	2.50708	Zic4	4.5641
Pip4k2c	Tmem263	Tle6	Lta4h	Appl2	Csnk1g2		Zfp948	4.89483	Tm6sf2	1.38744	Calml4	2.25882	Fam220a	0.445535	Zmat5	2.34671	Dnah12	4.1367
Kif5a	Pwp1	Sirt6	Metap2	1500009L16Rik	Btbd2		Oaz2	1.24191	H6pd	3.0733	Tm6sf2	1.97233	Gper1	0.214512	G0s2	0.72061	Esrra	3.90991
Mbd6	Prdm4	Gm10778	Fgd6	Nuak1	Mknk2		Nudt22	1.20496	Tead4	-0.204327	H6pd	3.38445	Gimap1	0.705311	Ccdc108	4.25857	Clic6	6.4734
Ddit3	Rtcb	1190007I07Rik	Nr2c1	Ckap4	Mob3a		Gm7729	-0.664027	Mad1l1	3.24032	Mad1l1	3.00333	Dhodh	0.705311	Fstl4	2.63412	H2-Q2	0.367364
R3hdm2	Fbxo7	Hcfc2	Tmcc3	Rfx4	Ap3d1		Ankfn1	1.44565	Hspb8	2.8844	Hspb8	3.51256	Ccdc173	2.31874	Acot4	0.070164	Vsig10	1.162
Stac3	Timp3	Txnrd1	Cep83	Ric8b	Plekhj1		6430503K07Rik	-0.413692	Nmi	1.38744	Nmi	1.06507	Tmem196	2.84911	Zfp566	2.59895	Foxc2	0.469638
Ndufa4l2	Syn3	Eid3	Plxnc1	Tmem263	Sf3a2		Pycard	0.225584	Ccdc81	0.733423	Ccdc81	0.822948	Sult5a1	0.705311	Optc	-0.151482	3110009E18Rik	1.33456
Shmt2	Hsp90b1	Chst11	Mrpl42	Btbd11	Amh		Gm3248	0.915915	H2-Q7	0.51014	Fam46a	3.89864	Sfxn2	1.81198	Wdr72	1.26029	Gnpda2	3.53851
Nxph4	Ascl1	Slc41a2	Nudt4	Pwp1	Lsm7		Gm4491	-0.303129	Fam46a	3.47492	Cmtr1	1.80447	Ska3	0.445535	Trim34a	3.12922	Trim5	0.818717
Lrp1	Gnptab	Aldh1l2	Eea1	Prdm4	Timm13		Prorsd1	0.72036	Cmtr1	1.62897	Ccdc147	-0.323246	Srp54b	4.61678	Otub2	-0.036407	Gfod2	3.79641
Stat6	Chpt1	Appl2	Btg1	Rtcb	Lmnb2		Syce2	-0.413692	Spata24	1.38744	Spata24	0.778328	BC022687	1.57235	Abca6	2.82884	Ddx58	3.5267
Nab2	Arl1	1500009L16Rik	Atp2b1	Fbxo7	Gadd45b		Creb3l2	2.88513	Draxin	0.339436	Pgm5	2.29094	Kcne2	4.0422	A2m	3.70989	B2m	5.47588
Zbtb39	Utp20	Nuak1	Galnt4	Timp3	Gng7		Hirip3	2.82553	Pgm5	2.1518	Rorc	1.33529	Eif4ebp1	0.763553	Bean1	2.66845	Nmb	1.09957
Gpr182	Slc17a8	Ckap4	Dusp6	Syn3	Diras1		Gm21967	4.18193	Rorc	1.09718	Chst5	-0.532158	Gp5	0.445535	Nlrc3	0.784617	4933415A04Rik	1.33456
Naca	Actr6	Tcp11l2	Cep290	Hsp90b1	Slc39a3		Rbm47	3.29854	Cd163	0.926736	Cd163	0.94908	Gm13251	2.79429	Trpc7	2.48798	Glb1l2	1.2793
Ptges3	Uhrf1bp1l	Rfx4	Lrriq1	Ascl1	Sgta		Tpx2	1.31307	Gpr25	0.51014	Gpr25	1.68869	Fas	1.60457	Apol8	1.75157	Pld5	3.59617
Baz2a	Anks1b	Ric8b	Slc6a15	Gnptab	Thop1		Agmo	3.06081	Atp11c	5.59181	Atp11c	5.14953	Cfh	7.25133	Gm7173	2.70199	Cenpo	3.17967
Apon	Apaf1	Tmem263	Tmtc2	Chpt1	Map2k2		Zfp960	2.01411	Stac3	1.1498	Stac3	1.45352	Hif3a	4.12228	Sult1c2	0.72061	Itga10	2.42359
Stat2	Slc25a3	Cry1	Ccdc59	Arl1	Zbtb7a		Gpr182	0.366069	Ccdc141	5.62935	Tspan11	0.166739	Gm8898	0.372562	Usp18	1.16731	Avil	1.38778
Il23a	Tmpo	Btbd11	Ppfia2	Utp20	Pias4		Mtf1	5.28165	Stk10	2.9452	Ccdc141	5.0754	Fam115c	0.514994	Kdm5d	1.93198	Gm3636	2.14318
Pan2	Cfap54	Pwp1	Ppp1r12a	Slc17a8	Dapk3		Slfn5	2.86158	Lyzl4	0.662767	Stk10	2.71455	6430571L13Rik	1.81198	Gm17641	-0.564779	1700010I14Rik	0.965968
Cnpy2	Elk3	Prdm4	Pawr	Scyl2	Nmrk2		Klhl6	0.611652	Slc38a3	4.71242	Lyzl4	0.420097	Slc16a8	1.11627	Fam195a	0.845903	Cdc14b	3.03705
Cs	Metap2	Rtcb	Brcc3dc	Actr6	Atcay		Catsper3	-0.664027	Zfand2b	2.12576	Slc38a3	5.17126	Ifi27	4.5645	Map3k8	2.40896	Rsph1	2.96883
Ankrd52	Vezt	Fbxo7	Syt1	Uhrf1bp1l	Zfr2		Tekt1	1.87992	Prrg4	2.17737	Zfand2b	2.74964	Gm3591	-0.682797	Sult1a1	3.88069	Ucp2	4.5171
Slc39a5	Nr2c1	Timp3	Nav3	Anks1b	Matk		Irf9	3.81604	Tnfrsf14	-0.077944	Prrg4	0.420097	Gadd45b	2.79429	Cdh15	-0.151482	Pex11g	-0.293092
Nabp2	Ndufa12	Hsp90b1	Osbpl8	Apaf1	Mrpl54		Star	1.31307	Acot5	-0.204327	Tnfrsf14	-0.323246	Inhba	3.12936	P2rx6	1.61741	C130026L21Rik	0.65471
Smarcc2	Tmcc3	Ascl1	Phlda1	Ikbip	Pip5k1c		Parvg	2.0562	Cwc27	3.5355	Gna14	0.298973	Syne3	2.29918	Mmp19	0.653632	Lcp2	2.26196
Myl6	Cep83	Gnptab	Kcnc2	Tmpo	Cactin		Vps39	2.55898	Irx5	-0.342854	Acot5	0.908249	Rnf207	1.50566	Mcm2	1.71918	Igdcc3	0.965968
Esyt1	Plxnc1	Sycp3	Atxn7l3b	Cfap54	Tbxa2r		Taf1d	0.821448	2410131K14Rik	4.25286	Cwc27	3.84556	Chd1l	3.31607	Fanci	0.845903	Khdc3	-0.910921
Rpl41	Socs2	Arl1	Rab21	Cdk17	Hmg20b		Ptpn6	0.771789	Vegfa	5.24102	Irx5	-0.423924	Serpina3n	6.17578	Serping1	1.71918	mt-Nd5	9.46776
Pa2g4	Nudt4	Utp20	Thap2	Elk3	4930404N11Rik		Ccdc79	0.66703	0610010K14Rik	-0.342854	2410131K14Rik	4.23216	Eif2ak2	4.46709	Dna2	0.961179	Lrrc23	3.17967
Rps26	Eea1	Slc17a8	Zfc3h1	Metap2	Fzr1		Hist1h2ak	0.66703	Gm13152	1.80333	Vegfa	5.43112	Defb1	-1.49704	Cat	5.34325	Gm17509	0.008183
Cdk2	Btg1	Actr6	Ptprr	Vezt	Dohh		Ifit2	3.28975	Cited4	0.038255	0610010K14Rik	0.684722	Rnf213	6.02322	Tnfsf12	-0.925363	AU021092	1.03432
Pmel	Dcn	Uhrf1bp1l	Ptprb	Ndufa12	Smim24		4930444P10Rik	0.494079	Dhrs11	1.43061	Gm13152	1.82655	Zic1	4.43609	Yars2	1.93198	Palb2	0.56514
Dgka	Atp2b1	Anks1b	Cnot2	Tmcc3	Celf5		Gm13139	2.67157	Harbi1	2.27534	Dgkk	1.8483	Prdm9	2.43081	Meig1	1.54534	Sntb1	3.26748
Tmem198b	Poc1b	Apaf1	Myrfl	Cep83	Gna11		Stra6	2.55898	Htr1f	1.7701	Cited4	-1.24419	H2-T23	2.8889	Gbp7	3.75052	Wfdc3	-0.674351
Sarnp	Galnt4	Slc25a3	Rab3ip	Plxnc1	Tle2		Aoc2	2.07679	Tceanc2	4.14684	Dhrs11	1.58887	Cmklr1	1.91835	Car8	3.31408	Tmem220	0.56514
Gdf11	Kitl	Tmpo	Best3	Socs2	Sirt6		Mt1	5.16387	Zfp948	4.72981	Harbi1	2.32236	Sash3	1.20301	Ppp1r3e	1.93198	Spag1	4.17505
Itga7	Tmtc3	Cfap54	Lrrc10	Mrpl42	Gm10778		Fam203a	1.53767	Oaz2	0.985817	Htr1f	2.20926	Tacr1	1.69713	Wnk4	2.58104	Tmem121	0.367364
Tmt1b	Cep290	Elk3	Yeats4	Ube2n	Zfp433		Zfp689	0.66703	Nudt22	0.245858	Tceanc2	3.81827	Lrrc46	0.763553	Nkx2-2	0.169401	Card9	0.138102
Sfi1	Lrriq1	Ntn4	Cpsf6	Nudt4	Zfp938		Cnnm3	1.16705	Gm7729	-0.496109	Zfp948	4.90427	Arhgef5	3.41932	Ankrd23	1.34763	Neurl3	-0.471164
Eif4enif1	Slc6a15	Metap2	Mdm2	Eea1	Hcfc2		Bfsp2	1.24191	6430503K07Rik	-1.68178	Oaz2	1.63964	Naprt1	1.81198	Slc52a3	-0.413472	Pnpla7	2.49808
Drg1	Tmtc2	Fgd6	Slc35e3	Btg1	Nfyb		Notum	-0.014687	Pycard	0.145787	Nudt22	1.5628	Mybl2	0.873423	Dynlrb2	0.070164	Tmem41a	-1.19404
Patz1	Mettl25	Nr2c1	Nup107	Dcn	Txnrd1		Leo1	3.51018	Gm3248	0.339436	Lingo4	-0.140795	Gpr157	0.581262	Tap2	2.44901	H2-Q4	1.22185
Pik3ip1	Ppfia2	Ndufa12	Mdm1	Atp2b1	Eid3		Klhl33	0.494079	Gm4491	-0.342854	Gm7729	-0.649175	Slitrk6	1.47112	Zic4	3.72628	Triobp	2.7424
Limk2	Lin7a	Tmcc3	Dyrk2	Poc1b	Slc41a2		Prg4	0.771789	Prorsd1	1.2496	Ankfn1	1.7126	Tmem154	0.036992	Dnah12	3.80555	Marveld2	0.257282
Pla2g3	Ppp1r12a	Cep83	Cand1	Kitl	D10Wsu102e		3300002I08Rik	2.43684	Syce2	-0.342854	6430503K07Rik	-1.0709	Tymp	-0.165477	Esrra	3.65957	Cd74	1.53658
Selenom	Pawr	Plxnc1	Lemd3	Cep290	Aldh1l2		Slc4a5	4.14827	Creb3l2	2.53473	Pycard	-0.140795	Kdm8	1.57235	Clic6	5.51109	Ttll8	1.75485
Smtn	Gm5136	Socs2	Tbc1d30	4930430F08Rik	Washc4		Cyp27b1	-0.200439	Hirip3	2.97466	Gm3248	0.635538	Gm6169	-1.49704	Vsig10	1.3894	Ooep	1.162
Osbp2	Syt1	Nudt4	Gns	Lrriq1	Appl2		Otx2	3.16065	Gm21967	4.57969	Gm4491	-0.229138	Aspg	1.20301	Foxc2	0.509557	Fam179a	1.94439
Dusp18	Nav3	Eea1	Rassf3	Slc6a15	Nuak1		Ak2	2.11712	Rbm47	3.86939	Prorsd1	1.61448	Lgals3bp	4.5969	3110009E18Rik	0.349481	9330101J02Rik	2.82189
Slc35e4	Osbpl8	Btg1	Tbk1	Tmtc2	Ckap4		Ccdc112	2.89676	Tpx2	1.38744	Syce2	-0.423924	Pgpep1l	0.372562	Gnpda2	4.0595	Gabarapl1	0.56514
Tcn2	Nap1l1	Atp2b1	Xpot	Mettl25	Tcp11l2		Vsig10l	0.72036	Agmo	2.8844	Creb3l2	3.06964	Ubxn10	0.514994	Trim5	0.653632	Hist1h2af	-2.01427
Pes1	Phlda1	Poc1b	Kics2	Ccdc59	Polr3b		P2rx5	0.66703	Zfp960	1.89865	Hirip3	2.87147	Ikbke	0.925372	Gfod2	3.21303	Ier5l	0.257282
Gal3st1	Kcnc2	Galnt4	Srgap1	Ppfia2	Rfx4		Ngfr	0.297535	Mtf1	5.41501	Gm21967	3.90903	Rgs22	2.29918	Ddx58	4.28093	Nt5dc2	1.90842
Mtfp1	Atxn7l3b	Kitl	Rxylt1	Ppp1r12a	Ric8b		Slc25a47	0.297535	Slfn5	3.46457	Rbm47	2.64169	Tnfrsf23	0.2957	Umodl1	0.349481	Vwa5b1	3.82564
Ccdc157	Rab21	Tmtc3	Mon2	Pawr	Fhl4		4930415F15Rik	-0.807626	Klhl6	0.427311	Tpx2	0.822948	1700037C18Rik	0.975515	B2m	5.29736	Naip2	0.65471
Sf3a1	Tmem19	Cep290	Ctdsp2	Gm5136	Tmem263		Cyp27a1	1.00457	Tekt1	1.70126	Agmo	3.18523	Grcc10	1.72671	Nmb	0.72061	Banp	4.60961
Tbc1d10a	Zfc3h1	Mgat4c	Marchf9	Syt1	Btbd11		Fbxl19	3.32461	Irf9	3.89274	Zfp960	1.95238	Prlr	6.49977	4933415A04Rik	-0.276538	Shq1	2.61428
Hormad2	Ptprr	Lrriq1	Tspan31	Nav3	Pwp1		Micall2	0.494079	Star	2.07225	Gpr182	0.732284	Pcsk4	0.705311	Glb1l2	1.71918	C130074G19Rik	4.5641
Ascc2	Kcnmb4	Tmtc2	Agap2	Csrp2	Prdm4		Chrnb1	-0.413692	Parvg	2.75451	Mtf1	5.33811	Cdh19	5.03254	Pld5	2.54453	4932438H23Rik	2.76268
Uqcr10	Cnot2	Mettl25	B4galnt1	Osbpl8	Rtcb		Gm10530	2.4992	Vps39	2.36708	Slfn5	2.76115	Cep57	1.39946	Cenpo	2.75087	Pet100	3.36359
Cabp7	Myrfl	Ppfia2	Slc26a10	Nap1l1	Fbxo7		Pank2	0.960925	Taf1d	0.245858	Klhl6	0.908249	Il15ra	2.33803	Itga10	2.50708	Ripk4	1.162
Nf2	Rab3ip	Ppp1r12a	Arhgef25	Phlda1	Timp3		Lrrc6	2.43684	Ptpn6	1.55287	Itga2b	0.298973	Smad6	1.2445	Avil	-0.276538	Pdia5	1.48866
Thoc5	Lrrc10	Pawr	Pip4k2c	Kcnc2	Syn3		Slc2a12	4.40598	Ccdc79	0.427311	Catsper3	-1.0709	Abcc6	1.63609	Gm3636	2.16626	Vwa1	3.38992
Ap1b1	Frs2	Gm5136	Kif5a	Atxn7l3b	Hsp90b1		Psma8	-0.807626	Hist1h2ak	-0.077944	Tekt1	1.75927	Msantd1	1.81198	1700010I14Rik	1.5079	Tnfsf10	2.17381
Rasl10a	Yeats4	Syt1	Mbd6	Trhde	Ascl1		Mpv17l2	0.960925	Ifit2	3.31133	Irf9	3.70364	Hist1h2bf	1.89249	Cdc14b	3.53485	Cd302	2.39788
Gas2l1	Cpsf6	Nav3	Ddit3	Rab21	Pmch		Zbtb16	6.70807	4930444P10Rik	0.038255	Star	0.732284	Gm10645	0.2957	Krt19	2.48798	Ppp1r15a	3.42852
Ewsr1	Slc35e3	Osbpl8	R3hdm2	Tmem19	Chpt1		Ybey	2.21327	Gm13139	3.27626	Parvg	2.20926	Zfp513	3.19432	Rsph1	1.65214	2024-09-05	0.56514
Rhbdd3	Dyrk2	Phlda1	Stac3	Thap2	Arl1		Rgs11	4.34362	Stra6	2.57377	Vps39	2.7839	Tmem72	4.66724	Ucp2	4.17744	C030017K20Rik	2.01374
Emid1	Cand1	Kcnc2	Ndufa4l2	Zfc3h1	Utp20		Utp14b	6.15838	Aoc2	2.32194	Taf1d	0.822948	Arc	6.74985	Pex11g	0.169401	B3gnt6	0.008183
Kremen1	Grip1	Atxn7l3b	Shmt2	Ptprr	Scyl2		Heatr1	4.24243	Mt1	4.80965	Ptpn6	0.298973	Mei1	0.581262	Coro2a	1.06792	Gjc2	2.87876
Mrps24	Helb	Rab21	Nxph4	Ptprb	Actr6		Unc13d	0.366069	Fam203a	1.04257	Ccdc79	0.584619	Drc1	3.7059	C130026L21Rik	-0.151482	Angptl2	3.97222
Dbnl	Tmbim4	Tmem19	Lrp1	Kcnmb4	Uhrf1bp1l		Ddx60	1.94857	Zfp689	1.20056	Hist1h2ak	0.988787	Rhbdd3	0.128481	Lcp2	2.54453	Ak9	3.22424
Pgam2	Llph	Zfc3h1	Nab2	Cnot2	Anks1b		Pip5kl1	0.366069	Cnnm3	1.09718	Ifit2	3.33138	Ptafr	0.819534	Igdcc3	1.87431	Col20a1	2.82189
Polm	Lemd3	Ptprr	Zbtb39	Myrfl	Apaf1		Shroom1	1.78299	Bfsp2	0.662767	4930444P10Rik	0.635538	Gm4461	2.23887	mt-Nd5	8.25127	Chdh	3.9809
Aebp1	Tbc1d30	Ptprb	Gpr182	Rab3ip	Tmpo		Incenp	2.86158	Leo1	3.4852	Gm13139	2.44162	Slc38a5	2.06451	Lrrc23	1.30462	Map3k7cl	-0.674351
Pold2	Gns	Kcnmb4	Naca	Best3	Nedd1		Suv420h2	3.08134	Klhl33	0.245858	Barx2	-0.423924	H2-D1	4.07707	Gm17509	1.46947	Fhod1	1.2793
Ykt6	Rassf3	Cnot2	Ptges3	Lrrc10	Cfap54		Abca4	4.32222	Prg4	0.245858	Stra6	2.70266	Zfp69	0.2957	AU021092	0.262249	Armc3	1.48866
Camk2b	Xpot	Rab3ip	Baz2a	Frs2	Cdk17		Prelid2	-0.533436	3300002I08Rik	2.72013	Aoc2	1.82655	Raly	2.06451	Palb2	1.21455	Pla2g5	2.07991
Nudcd3	BC048403	Lrrc10	Stat2	Yeats4	Elk3		AA986860	1.16705	Slc4a5	4.6407	Mt1	5.41845	Siah3	0.705311	Sntb1	2.54453	Ptch2	0.367364
Ddx56	Srgap1	Cct2	Il23a	Cpsf6	Lta4h		Samd1	3.24496	Cyp27b1	0.339436	Fam203a	1.82655	Gm17732	0.445535	Tmem220	-1.14627	Foxj1	3.83525
Ogdh	Rxylt1	Frs2	Pan2	Slc35e3	Metap2		Ppp1r3f	3.16065	Scgn	0.038255	Zfp689	0.866229	Gm2237	1.32406	Spag1	4.41841	Sp110	0.469638
Zmiz2	Mon2	Yeats4	Cnpy2	Dyrk2	Vezt		BC100451	1.0881	Otx2	3.57451	Cnnm3	1.06507	Cox4i2	-1.49704	Agbl1	0.509557	Ttll9	1.22185
H2az2	Tafa2	Cpsf6	Cs	Cand1	Fgd6		Lsm2	1.24191	Ak2	1.62897	Bfsp2	1.23979	Mns1	1.86615	Tmem121	0.070164	Whrn	5.3508
Purb	Ctdsp2	Slc35e3	Slc39a5	Grip1	Nr2c1		E130012A19Rik	3.12154	Ccdc112	2.45334	Notum	0.021151	Sh3bgr	0.514994	Trim72	0.349481	Lefty1	1.87153
Ccm2	Tsfm	Nup107	Smarcc2	Tmbim4	Ndufa12		Mapk15	-0.200439	Vsig10l	0.588471	Leo1	3.5791	Pate2	0.514994	Card9	-0.151482	Hes6	2.1119
Nacad	Mettl1	Mdm1	Myl6	Lemd3	Tmcc3		Zfp579	2.90829	P2rx5	0.245858	Klhl33	0.234371	Ogfod2	3.20487	Neurl3	-0.276538	Shkbp1	3.32318
Tbrg4	Cyp27b1	Dyrk2	Esyt1	Tbc1d30	Cep83		mt-Nd4l	3.61246	Slc25a47	-0.204327	Prg4	0.732284	Steap2	5.60832	Pnpla7	2.32535	Plcg2	2.7424
Adcy1	March9	Cand1	Rpl41	Gns	Plxnc1		Apoo-ps	1.04694	Cyp27a1	1.2496	3300002I08Rik	2.30674	Gm5424	3.74978	H2-Q4	0.262249	Zfhx3	5.72626
Tns3	Tspan31	Grip1	Pa2g4	Rassf3	Socs2		Ear2	-1.35129	Fbxl19	3.05962	Slc4a5	3.49887	Slc26a1	1.36225	Triobp	2.14203	Kif7	1.09957
Hus1	Agap2	Helb	Rps26	Xpot	Nudt4		Pappa	1.24191	Micall2	-0.077944	Cyp27b1	-0.423924	Fam161a	3.72801	Marveld2	1.16731	Timm8b	-1.19404
Ddc	B4galnt1	Tmbim4	Cdk2	BC048403	Eea1		Arhgap31	5.48985	Chrnb1	-0.496109	Otx2	3.06035	1700007K13Rik	1.66693	Cd74	0.961179	Slc25a15	3.81596
Cobl	Slc26a10	Llph	Pmel	Rxylt1	Btg1		Lrrc2	0.494079	Gm10530	2.70263	Ak2	2.57803	Plekhg4	0.372562	Ttll8	2.2593	Ccdc146	2.17381
Cnrip1	Arhgef25	Lemd3	Dgka	Mon2	Atp2b1		Gm216	1.56708	Pank2	1.51326	Ccdc112	2.96403	Myh7b	1.63609	Ooep	0.431738	Sod3	2.59178
Ppp3r1	Dtx3	Tbc1d30	Tmem198b	Ctdsp2	Poc1b		Asl	2.89676	Lrrc6	2.47412	Vsig10l	0.866229	Nudt7	2.29918	Fam179a	1.71918	Slc35c2	1.33456
Pno1	Pip4k2c	Gns	Sarnp	Tsfm	Dusp6		Gpank1	2.15635	Slc2a12	4.78491	P2rx5	0.908249	Atg9b	1.28483	9330101J02Rik	2.85888	Ecm1	2.31787
Spred2	Kif5a	Tbk1	Gdf11	Mettl1	Cep290		Serf1	1.70576	Psma8	-1.08735	Ngfr	0.420097	Fancl	0.819534	Gm11042	-1.14627	B230317F23Rik	1.162
Actr2	Dctn2	BC048403	Cd63	Cyp27b1	4930430F08Rik		Tor3a	2.61637	Mpv17l2	0.80078	Slc25a47	0.584619	Xlr	-0.535069	Gabarapl1	1.11847	Abcc3	1.09957
Rab1a	Mbd6	Srgap1	Sfi1	March9	Nts		Cyp2r1	1.20496	Zbtb16	6.92001	4930415F15Rik	-0.776528	mt-Co3	7.25323	Ier5l	1.30462	C130060K24Rik	0.739043
Cep68	Ddit3	Rxylt1	Eif4enif1	Tspan31	Rassf9		Ccdc25	4.59274	Ybey	1.51326	Cyp27a1	1.33529	Cdkn1a	1.86615	Nt5dc2	1.98743	Exosc5	1.58295
Slc1a4	R3hdm2	Mon2	Drg1	Agap2	Lrriq1		1110004E09Rik	3.06081	Rgs11	4.35723	Fbxl19	3.53285	Plcb2	1.81198	Vwa5b1	2.30367	Tcerg1l	3.4029
Sertad2	Stac3	Ctdsp2	Patz1	B4galnt1	Slc6a15		Mvp	1.83227	Utp14b	6.27262	Micall2	0.732284	Dqx1	0.705311	Naip2	1.11847	Nfxl1	1.71375
Lgalsl	Nxph4	Avil	Limk2	Arhgef25	Tmtc2		Gm11992	0.869454	Heatr1	4.41211	Chrnb1	-0.229138	Frat2	2.41273	Banp	4.05302	Zfp219	4.16746
Vps54	Lrp1	Mettl1	Pla2g3	Dtx3	Mettl25		Ddx43	-0.664027	Unc13d	0.038255	Gm10530	1.89084	Iqcg	2.55143	Shq1	2.32535	Tnfrsf25	4.3394
Ugp2	Nab2	March9	Inpp5j	Pip4k2c	Ppfia2		Ifih1	3.4244	Ddx60	1.59142	Pank2	0.988787	Hist1h2ad	0.2957	C130074G19Rik	3.61626	Isoc2a	3.1645
Otx1	Zbtb39	Cdk4	Selenom	Kif5a	Acss3		Klf15	3.98354	Pip5kl1	0.926736	Lrrc6	1.93216	Tmem17	2.56787	4932438H23Rik	1.98743	Loxl1	2.23317
Commd1	Gpr182	Agap2	Smtn	Dctn2	Ppp1r12a		Dmpk	3.52524	Shroom1	1.73609	Slc2a12	4.01378	Zmat5	2.8625	Pet100	2.82884	Ptrh1	1.75485
Cct4	Naca	Os9	Morc2a	Mbd6	Pawr		Fermt3	0.771789	Incenp	2.6488	Gm9767	-1.24419	G0s2	1.43574	Slc17a9	-0.036407	Rps27a	5.65749
Usp34	Ptges3	B4galnt1	Osbp2	Ddit3	Gm5136		Acrbp	1.94857	Suv420h2	2.86878	Mpv17l2	1.10174	Ccdc108	3.75697	Pdia5	2.52592	Ankef1	1.75485
Pus10	Atp5b	Slc26a10	Dusp18	R3hdm2	Syt1		Hba-a2	0.72036	Abca4	4.70804	Zbtb16	6.53381	Fstl4	3.23605	Vwa1	3.39832	Mfrp	4.41825
Rel	Baz2a	Arhgef25	Slc35e4	Stac3	Nav3		Emilin2	1.16705	AA986860	1.47252	Ybey	2.08653	Acot4	1.7557	Tnfsf10	2.28166	Hmga1	4.02356
Papolg	Gls2	Dtx3	Tcn2	Ndufa4l2	Zdhhc17		A4galt	0.494079	Samd1	3.34557	Rgs11	4.33587	Zfp566	2.23887	Cd302	2.71847	Sardh	3.26748
Bcl11a	Stat2	Pip4k2c	Gal3st1	Shmt2	Osbpl8		Zfp747	2.11712	Ppp1r3f	2.98918	Utp14b	6.05586	Optc	-0.278471	Ppp1r15a	2.76681	Fhad1	3.98953
Ccdc85a	Cnpy2	Kif5a	Mtfp1	Nxph4	Bbs10		Tpcn1	1.99259	BC100451	0.865132	Heatr1	4.13376	Wdr72	1.32406	C030017K20Rik	1.16731	Cir1	5.03773
Cfap36	Cs	Dctn2	Sf3a1	Lrp1	Phlda1		Sgms2	3.88772	Lsm2	1.66557	Ddx60	1.80447	Trim34a	2.60019	Fbxo24	-0.733835	Alg8	3.08617
Prorsd1	Coq10a	Mbd6	Tbc1d10a	Nab2	Kcnc2		Ap5z1	3.2174	E130012A19Rik	3.10029	Pip5kl1	0.635538	Abca6	4.20867	Gjc2	1.5079	Resp18	-0.293092
Rtn4	Slc39a5	Ddit3	Castor1	Zbtb39	Atxn7l3b		Egr3	3.97808	Mapk15	-0.204327	Shroom1	1.58887	A2m	3.61391	Mid1	2.14203	Gm21685	3.90079
Fem1al	Nabp2	R3hdm2	Hormad2	Gpr182	Rab21		Mafg	5.13715	Zfp579	2.6488	Incenp	2.94397	Bean1	2.60019	Angptl2	3.28117	Dnajb1	5.61628
Eml6	Smarcc2	Stac3	Ascc2	Naca	Tmem19		Lyar	2.3549	mt-Nd4l	6.05194	Suv420h2	2.97396	Nlrc3	1.43574	Ak9	2.32535	Pgap3	2.63644
Sptbn1	Myl6	Ndufa4l2	Uqcr10	Ptges3	Zfc3h1		Gm16314	0.72036	Apoo-ps	1.29702	Abca4	3.98952	Trpc7	2.35707	Gm3558	0.070164	Ydjc	2.31787
Acyp2	Esyt1	Nxph4	Cabp7	Baz2a	Ptprb		Gmppb	2.48386	Gyltl1b	0.926736	Prelid2	0.021151	S100a9	0.445535	Col20a1	2.91716	Clcf1	0.008183
Psme4	Zc3h10	Lrp1	Nf2	Rbms2	Kcnmb4		Krt18	2.40462	Pappa	1.20056	AA986860	0.822948	Apol8	1.16029	Chdh	3.8209	Il6ra	2.78269
Erlec1	Rpl41	Stat6	Thoc5	Gls2	Cnot2		Tnfaip2	0.149854	Arhgap31	5.563	Samd1	3.24384	Gm7173	2.48375	Map3k7cl	-0.413472	Mafk	3.4537
Chac2	Pa2g4	Nab2	Ap1b1	Stat2	Myrfl		Mpdu1	3.40824	Lrrc2	0.662767	Ppp1r3f	3.38445	Sult1c2	1.47112	Fhod1	1.01554	Gpam	3.96348
Bod1	Rps26	Tac2	Nefh	Cnpy2	Best3		Gm4924	0.554063	Gm216	1.43061	BC100451	1.53625	Usp18	-0.060693	Armc3	0.72061	Kcnk6	2.34504
Cpeb4	Suox	Zbtb39	Rasl10a	Cs	Lrrc10		Antxr2	2.15635	Asl	2.66697	Lsm2	1.63964	Kdm5d	3.41932	Pla2g5	0.653632	Mum1l1	3.17967
Nsg2	Cdk2	Gpr182	Gas2l1	Ankrd52	Cct2		Dmrt3	0.149854	Trim14	0.038255	E130012A19Rik	3.37698	Gm17641	0.128481	Ptch2	0.431738	Mei4	0.65471
Snrnp25	Pmel	Naca	Ewsr1	Slc39a5	Lyz2		Dnajb11	5.01441	Gpank1	1.92907	Mapk15	0.866229	Fam195a	1.66693	Foxj1	2.32535	Sdpr	3.81596
Mpg	Tmem198b	Baz2a	Rhbdd3	Nabp2	Cpsf6		Tceal5	4.26952	Serf1	1.73609	Zfp579	2.85007	Map3k8	2.46632	Ttll9	-0.151482	Eltd1	4.7835
Sh3pxd2b	Dnajc14	Gls2	Emid1	Smarcc2	Cpm		Ccdc51	1.12811	Tor3a	2.853	mt-Nd4l	3.86169	Sult1a1	4.30986	Whrn	4.45329	Ccdc102a	-0.471164
Ubtd2	Sarnp	Stat2	Kremen1	Myl6	Mdm2		Ythdc1	5.57012	Cyp2r1	1.34294	Apoo-ps	1.17242	P2rx6	1.16029	Lefty1	1.90344	Spag16	3.6297
Efcab9	Gdf11	Il23a	Mrps24	Esyt1	Slc35e3		Erich1	2.76336	Ccdc25	4.71242	Ear2	-1.44116	Mmp19	1.78411	Hes6	2.04082	Folr1	4.42463
Stk10	Cd63	Pan2	Pgam2	Zc3h10	Nup107		Olfr46	-0.664027	1110004E09Rik	2.45334	Pappa	1.5092	Mcm2	1.94377	Shkbp1	3.25881	Rgl3	1.7948
Fbxw11	Bloc1s1	Cs	Polm	Rpl41	Mdm1		Eln	1.5959	Mvp	2.55438	Cenpa	0.822948	Serping1	4.18756	Plcg2	3.16574	Herc6	2.44885
Slit3	Itga7	Slc39a5	Aebp1	Pa2g4	Dyrk2		Prr7	1.62416	Gm11992	0.145787	Arhgap31	5.52863	Dna2	0.514994	Zfhx3	4.79765	Sord	3.72583
Pank3	Eif4enif1	Nabp2	Pold2	Rps26	Cand1		Zfp771	2.07679	Ddx43	0.038255	Lrrc2	0.732284	Cat	6.70132	Kif7	1.90344	Micall1	4.319
Fbll1	Drg1	Smarcc2	Ykt6	Cdk2	Grip1		Lzts2	3.50259	Ifih1	3.12678	Gm216	1.63964	Tnfsf12	1.02397	Timm8b	-0.564779	Spc25	-0.134605
Rars1	Patz1	Myl6	Camk2b	Pmel	Llph		Cox20	3.46402	Klf15	3.96792	Asl	3.25202	Yars2	1.7557	Slc25a15	3.55334	Notch4	2.3717
Wwc1	Pik3ip1	Esyt1	Nudcd3	Dgka	Msrb3		BC007180	3.66781	Dmpk	3.71208	Foxm1	0.420097	Meig1	0.925372	Ccdc146	0.262249	Mkrn3	0.469638
Tenm2	Limk2	Zc3h10	Ddx56	Pym1	Lemd3		Capsl	2.07679	Fermt3	1.55287	Gpank1	2.17525	Gbp7	4.15529	Troap	-0.733835	H2-K1	4.26313
Mat2b	Pla2g3	Pa2g4	Ogdh	Tmem198b	Tbc1d30		Swap70	3.46402	Acrbp	2.17737	Serf1	1.93216	Car8	3.95741	Sod3	2.30367	4930523C07Rik	2.04721
Gabra1	Inpp5j	Rps26	Zmiz2	Dnajc14	Rassf3		Cd59a	1.90317	Hba-a2	0.51014	Tor3a	2.30674	Ppp1r3e	0.514994	Slc35c2	0.583392	Lepre1	3.13368
Slu7	Selenom	Ikzf4	Purb	Sarnp	Tbk1		Gm10263	-1.87643	Emilin2	1.55287	Cyp2r1	0.584619	Wnk4	2.7373	Tmem202	0.262249	Sik1	5.03773
Ccnjl	Smtn	Pmel	Nacad	Gdf11	Xpot		Icam2	0.431493	A4galt	0.80078	Ccdc25	4.48215	Nkx2-2	1.39946	Ecm1	1.95997	Tmem8b	2.82189
Fabp6	Morc2a	Dgka	Tbrg4	Cd63	BC048403		Fcgr2b	1.70576	Zfp747	2.07225	1110004E09Rik	3.36948	Stat5a	0.64462	B230317F23Rik	0.431738	Egr1	7.44338
Ttc1	Osbp2	Tmem198b	Adcy1	Bloc1s1	Srgap1		Cyyr1	2.57354	Tpcn1	1.55287	Mvp	1.75927	Ankrd23	1.86615	Abcc3	1.06792	Lgr6	0.818717
Adra1b	Dusp18	Sarnp	Tns3	Itga7	Mon2		Enox1	0.554063	Sgms2	4.37943	Gm11992	1.61448	Slc52a3	1.11627	Rhbdf2	0.72061	Acox2	-0.134605
Rnf145	Slc35e4	Gdf11	Cobl	Eif4enif1	Slc16a7		Ccdc176	3.47958	Ap5z1	3.12678	Ifih1	3.25202	Dynlrb2	1.50566	C130060K24Rik	0.262249	Ddx11	1.22185
Clint1	Tcn2	Bloc1s1	Cnrip1	Drg1	Lrig3		Paqr5	2.43684	Egr3	3.93832	Klf15	3.97477	Grxcr2	-1.24657	Exosc5	1.68605	Gstt3	0.65471
Lsm11	Gal3st1	Mettl7b	Ppp3r1	Patz1	Ctdsp2		Dcdc2a	3.57676	Mafg	5.18224	Dmpk	3.41391	Tap2	2.25926	Tcerg1l	3.81325	Hspa5	8.12147
Adam19	Mtfp1	Eif4enif1	Pno1	Pik3ip1	Tspan31		Fzd7	3.35021	Lyar	1.59142	Fermt3	1.10174	Zic4	2.0875	Nfxl1	1.71918	Slc5a7	1.53658
Nipal4	Sec14l2	Drg1	Dnaaf10	Limk2	Agap2		Cchcr1	0.821448	Gm16314	0.985817	Acrbp	2.08653	Dnah12	3.32577	Zfp219	3.83608	Dusp5	4.52899
Fndc9	Sf3a1	Patz1	Spred2	Inpp5j	B4galnt1		BC002059	2.61637	Gmppb	2.22719	Hba-a2	0.866229	Esrra	3.62966	Tnfrsf25	4.59391	Tcf7l1	1.48866
Cyfip2	Tbc1d10a	Pik3ip1	Actr2	Selenom	Arhgef25		Nes	3.33319	Krt18	2.72013	Emilin2	0.477048	Clic6	5.68755	Isoc2a	2.73476	Irak3	1.48866
Trim41	Ascc2	Limk2	Rab1a	Smtn	Dtx3		Rhog	3.10158	Tnfaip2	1.47252	A4galt	0.988787	Vsig10	1.78411	Loxl1	1.26029	Glipr1	0.56514
Trim7	Uqcr10	Inpp5j	Sertad2	Morc2a	Pip4k2c		Fam60a	2.3549	Mpdu1	3.00354	Zfp747	1.95238	3110009E18Rik	1.36225	Ptrh1	0.349481	Rbks	1.09957
Mgat1	Zmat5	Selenom	Vps54	Osbp2	Kif5a		Proca1	0.297535	Antxr2	1.43061	Tpcn1	2.12268	Gnpda2	3.78536	Rps27a	6.00323	Ctsc	4.31213
Cnot6	Cabp7	Smtn	Ugp2	Dusp18	Mbd6		Klf10	4.79582	Dmrt3	-0.667601	Sgms2	3.42119	Trim5	0.128481	Ankef1	1.78325	Gipr	0.818717
Mapk9	Nf2	Morc2a	Otx1	Slc35e4	Ddit3		Fam160a2	1.99259	Dnajb11	4.85393	Ap5z1	3.38445	Gfod2	3.11824	Mfrp	3.81325	Calcrl	3.85428
Tbc1d9b	Thoc5	Osbp2	Tmem17	Tcn2	Arhgap9		Wdr31	2.60223	Tceal5	4.43349	Egr3	3.88818	Ddx58	3.57379	Hmga1	3.18957	Evpl	0.818717
Mrnip	Ap1b1	Dusp18	B3gnt2	Gal3st1	R3hdm2		Itfg3	3.50259	Ccdc51	1.1498	Mafg	5.08688	Umodl1	1.2445	Sardh	2.34671	Baiap2l1	2.3717
Sqstm1	Rasl10a	Slc35e4	Commd1	Mtfp1	Stac3		Irgm2	2.40462	Ythdc1	5.60364	Lyar	2.36825	B2m	6.26416	Fhad1	2.76681	Ccdc159	3.56185
Mgat4b	Gas2l1	Tcn2	Cct4	Sec14l2	Shmt2		Hrh2	1.20496	Erich1	2.55438	Gm16314	0.420097	Nmb	1.02397	Cir1	4.85094	Mobp	6.80587
Ltc4s	Ewsr1	Mtfp1	Fam161a	Sf3a1	Nxph4		Pak4	2.3549	Olfr46	-0.077944	Gmppb	2.73804	4933415A04Rik	0.2957	Alg8	3.17771	Steap1	3.33678
Maml1	Rhbdd3	Sec14l2	Xpo1	Tbc1d10a	Lrp1		Mex3a	2.21327	Eln	1.09718	Krt18	2.24249	Glb1l2	1.32406	Gm21685	2.66845	Rsph4a	3.81596
Canx	Emid1	Rnf215	Pus10	Castor1	Nab2		Myl4	0.225584	Prr7	1.73609	Mpdu1	3.46408	Pld5	2.29918	Dnajb1	5.08183	Gpr56	1.53658
Hnrnph1	Kremen1	Sf3a1	Papolg	Ascc2	Zbtb39		Ccdc134	-0.807626	Zfp771	1.34294	Gm4924	0.866229	Cenpo	2.66274	Pgap3	2.04082	Tysnd1	0.89422
Rufy1	Ccdc117	Tbc1d10a	Bcl11a	Uqcr10	Naca		Irf5	0.72036	Lzts2	3.78874	Antxr2	2.35311	Itga10	2.37587	Ydjc	2.01437	Ghr	4.60961
Col23a1	Mrps24	Castor1	Ccdc85a	Cabp7	Ptges3		Acad12	1.31307	Cox20	3.29973	Dmrt3	-0.140795	Avil	1.28483	Il6ra	2.82884	Xkr6	5.54779
Phykpl	Dbnl	Hormad2	Ppp4r3b	Nf2	Atp5b		Cald1	4.454	BC007180	3.17835	Dnajb11	5.17557	Gm3636	2.13239	Arhgap9	-0.276538	Cers1	1.83367
Hnrnpab	Pgam2	Ascc2	Cfap36	Thoc5	Baz2a		Rab11fip1	2.55898	Capsl	2.29883	Tceal5	4.17737	1700010I14Rik	-0.060693	Mafk	3.01379	Wnt3	1.62789
Sec24a	Polm	Zmat5	Prorsd1	Ap1b1	Gls2		Bola3	2.89676	Swap70	3.22813	Ccdc51	1.61448	Cdc14b	3.08437	Gpam	3.93811	Ptgdr	0.739043
Jade2	Aebp1	Cabp7	Rtn4	Rasl10a	Spryd4		Wdr52	5.06167	Cd59a	2.32194	Ythdc1	5.57502	Krt19	-1.03322	Stx11	-0.733835	Efcab4a	-0.134605
Ube2b	Pold2	Nf2	Fem1al	Gas2l1	Cs		Catsper2	1.90317	Gm10263	-0.667601	Erich1	2.66639	Gm9972	-0.535069	Nup210l	0.72061	Sp8	2.95126
Skp1	Ykt6	Ap1b1	Eml6	Ewsr1	Coq10a		Slc29a1	2.48386	Icam2	0.145787	Olfr46	-0.532158	Rsph1	2.46632	Kcnk6	2.65139	Sla2	0.469638
Vdac1	Camk2b	Rasl10a	Sptbn1	Rhbdd3	Ankrd52		Cyp11a1	1.12811	Fcgr2b	1.20056	Eln	1.42486	Ucp2	4.52296	Mum1l1	2.95937	Csrnp1	2.70094
Fstl4	Nudcd3	Gas2l1	Acyp2	Kremen1	Slc39a5		Dsg2	3.38366	Cyyr1	2.43226	Prr7	2.03056	Coro2a	1.16029	Mei4	1.46947	Grk4	3.08617
Hspa4	Ogdh	Ewsr1	Psme4	Mrps24	Nabp2		Zfp51	2.68505	Enox1	0.51014	Zfp771	2.27497	C130026L21Rik	0.128481	Sdpr	3.48756	Atad2	2.70094
Zcchc10	Zmiz2	Rhbdd3	Gpr75	Dbnl	Smarcc2		Fdx1	2.25	Gm1078	0.038255	Lzts2	3.36948	Ankmy1	-0.278471	Eltd1	4.89147	Gm9989	0.818717
Aff4	H2afv	Kremen1	Erlec1	Pgam2	Myl6		Mybl1	2.01411	Ccdc176	3.3568	Cox20	3.55946	Lcp2	2.25926	Ccdc102a	-0.276538	Noxred1	1.22185
Uqcrq	Purb	Ccdc117	Chac2	Polm	Pa2g4		Cd320	3.50259	Paqr5	2.29883	BC007180	3.76209	Igdcc3	1.32406	Spag16	2.75087	Scp2	6.0856
Shroom1	Ccm2	Mrps24	Bod1	Aebp1	Rps26		3110007F17Rik	1.56708	Dcdc2a	3.70331	Capsl	2.08653	Khdc3	0.819534	Folr1	3.40851	Rph3al	1.87153
Sowaha	Nacad	Dbnl	Cpeb4	Pold2	Ikzf4		Igf2	6.31393	Fzd7	3.29973	Swap70	3.53285	mt-Nd5	10.0958	Rgl3	1.5079	Cyp4f17	0.739043
Septin8	Tbrg4	Pgam2	Nsg2	Ykt6	Suox		H2-M3	-0.664027	Cchcr1	0.80078	Cd59a	2.33782	Lrrc23	2.55143	Herc6	3.1415	Fau	5.16513
Kif3a	Adcy1	Polm	Snrnp25	Camk2b	Cdk2		Asb16	0.431493	BC002059	2.59289	Gm10263	-1.94053	Gm17509	1.63609	Sord	3.44858	Wdr96	4.15216
Il4	Tns3	Aebp1	Rhbdf1	Nudcd3	Pmel		Gpr156	0.069928	Krt7	0.926736	Icam2	0.166739	AU021092	1.20301	Micall1	3.6424	Tcf15	-1.19404
Irf1	Cobl	Pold2	Nprl3	Ogdh	Pym1		Cep41	2.5294	Nes	3.62184	Fcgr2b	1.63964	Sntb1	3.40109	Spc25	0.169401	Enkd1	1.62789
Pdlim4	Vstm2a	Ykt6	Hba-a2	Zmiz2	Tmem198b		Fzd4	2.26802	Ms4a6c	0.245858	Cyyr1	2.53845	Wfdc3	-0.535069	Notch4	2.79816	Mrpl42	0.739043
Acsl6	Cnrip1	Camk2b	Ubtd2	Ppia	Sarnp		6720489N17Rik	0.069928	Rhog	2.82091	Enox1	0.360806	Tmem220	-0.401072	Mkrn3	-0.276538	Ccdc114	2.76268
Rapgef6	Ppp3r1	Nudcd3	Efcab9	H2afv	Gdf11		P2rx3	0.66703	Fam60a	2.91512	Gm1078	-0.229138	Spag1	4.65575	Gm5093	-0.733835	Mvb12a	2.23317
Cdc42se2	Pno1	Ddx56	Stk10	Purb	Cd63		Prkcsh	5.04609	Proca1	-0.862263	Ccdc176	3.5791	Fbxl22	0.763553	H2-K1	3.10436	Tas2r108	-1.19404
Gpx3	C1d	Ogdh	Fbxw11	Ccm2	Bloc1s1		Clrn1	0.869454	Klf10	4.69039	Paqr5	2.17525	Tmem121	1.43574	4930523C07Rik	1.93198	Ccdc62	2.42359
Tnip1	Meis1	Purb	Npm1	Nacad	Itga7		3110082I17Rik	1.7577	Fam160a2	1.89865	Dcdc2a	3.72143	Trim72	-0.847396	Lepre1	3.5716	Tfap4	1.162
Gm2a	Spred2	Ccm2	Slit3	Tbrg4	Olfr765		Wdr66	2.80098	Wdr31	2.91512	Fzd7	3.51256	Card9	0.036992	Sik1	4.5393	Gm973	3.59617
Slc36a1	Actr2	Nacad	Pank3	Adcy1	Eif4enif1		Slc4a2	5.0037	Itfg3	3.36795	Cchcr1	0.531836	Pnpla7	2.35707	Tmem8b	3.20135	Olfr558	0.138102
Sparc	Rab1a	Tbrg4	Fbll1	Tns3	Patz1		Cry1	3.72111	G430095P16Rik	-1.08735	BC002059	2.66639	Tmem41a	-0.847396	Egr1	6.88954	Olfr539	-0.910921
Atox1	Cep68	Adcy1	Rars1	Cobl	Pik3ip1		Adamtsl2	1.31307	Irgm2	2.73742	Nes	3.27629	H2-Q4	1.43574	Lgr6	0.509557	Phyhd1	0.818717
G3bp1	Sertad2	Igfbp3	Wwc1	Cnrip1	Limk2		Gm10093	0.611652	Hrh2	1.04257	Rhog	3.32364	Triobp	2.50097	Ddx11	1.30462	Mab21l1	0.138102
Gria1	Aftph	Tns3	Mat2b	Ppp3r1	Inpp5j		Lhfpl4	5.63231	Pak4	2.70263	Ptger1	0.095781	Marveld2	1.47112	Gstt3	0.961179	Slc13a4	5.25738
Mfap3	Vps54	Vwc2	Gabrg2	Pno1	Selenom		Pcp4	1.78299	Mex3a	1.8358	Fam60a	2.81737	Cd74	2.06451	Hspa5	8.227	Uimc1	2.26196
Sap30l	Ugp2	Cobl	Gabra1	C1d	Morc2a		Pm20d2	2.37166	Irf5	0.926736	Proca1	0.988787	Ttll8	2.04116	Slc5a7	1.11847	P2ry6	-0.471164
Larp1	Otx1	Vstm2a	Pttg1	Spred2	Osbp2		Zbtb26	4.489	Cald1	4.47016	Klf10	4.90945	Fam179a	1.63609	Dusp5	4.84345	Wdr13	2.95126
Cnot8	Ehbp1	Egfr	Slu7	Actr2	Dusp18		Myo1f	1.34737	Bank1	0.588471	Fam160a2	2.25882	9330101J02Rik	2.17593	Tcf7l1	1.87431	Bcor	5.13432
Gm12250	Zrsr1	Plek	Ccnjl	Cep68	Slc35e4		Pinx1	2.67157	Rab11fip1	3.12678	Wdr31	2.55176	Gm11042	-1.24657	Irak3	0.070164	Dlx6	2.63644
Irgm2	Commd1	Cnrip1	Fabp6	Sertad2	Gal3st1		Vwa3a	2.45268	Bola3	2.97466	Itfg3	3.38445	Gabarapl1	0.705311	Glipr1	0.583392	Gpr149	1.22185
Zfp692	Cct4	Ppp3r1	Pwwp2a	Aftph	Sec14l3		Chadl	1.56708	Wdr52	5.33206	Irgm2	2.45586	Hist1h2af	-0.535069	Rbks	2.19009	Stra13	1.4391
Zfp672	Fam161a	Pno1	Ttc1	Peli1	Sec14l2		Pnpt1	1.5959	Catsper2	2.12576	Hrh2	1.53625	Ier5l	0.819534	Ctsc	4.0135	Epor	0.56514
Sh3bp5l	Xpo1	C1d	Rnf145	Vps54	Rnf215		Rab4b	-0.413692	Slc29a1	1.8358	Pak4	2.14041	Nt5dc2	2.06451	Calcrl	4.51591	Galnt15	1.62789
Rnf187	Usp34	Spred2	Clint1	Ugp2	Sf3a1		4833427G06Rik	0.225584	Cyp11a1	0.80078	Mex3a	2.17525	Vwa5b1	2.70793	Baiap2l1	1.42999	Atp5l	1.33456
H2bc27	Ahsa2	Actr2	Lsm11	Otx1	Tbc1d10a		Polr3d	3.71456	Dsg2	3.71208	Myl4	0.298973	Naip2	0.705311	Ccdc159	3.63374	Slc14a2	1.2793
H2ac25	0610010F05Rik	Cep68	Adam19	Commd1	Castor1		Alg12	2.72474	Zfp51	2.75451	Ccdc134	-0.532158	Banp	4.65959	Mobp	6.26541	Neurod2	6.23647
Trim11	Pus10	Sertad2	Nipal4	Cct4	Lif		Ccdc55	3.51773	Fdx1	1.86757	Irf5	1.33529	Shq1	2.19722	Steap1	2.58104	Col4a4	2.54569
Iba57	Rel	Aftph	Fndc9	Fam161a	Mtmr3		9030624G23Rik	-1.14645	Mybl1	2.01667	Acad12	1.39562	C130074G19Rik	3.34497	Rsph4a	3.85856	Bok	4.59271
Gjc2	Papolg	Lgalsl	Cyfip2	Xpo1	Ascc2		Rgs6	2.32077	Cd320	3.5841	Cald1	4.23216	4932438H23Rik	1.7557	Gpr56	1.30462	Caps2	1.03432
Mrpl55	Bcl11a	Peli1	Trim41	Usp34	Uqcr10		Nav1	0.494079	3110007F17Rik	1.09718	Rab11fip1	2.49774	Pet100	3.96983	Tysnd1	0.070164	Klf4	1.75485
Arf1	Ccdc85a	Vps54	Trim7	Ahsa2	Zmat5		Crocc	5.05909	Igf2	6.48461	Bola3	2.87147	Ripk4	0.036992	Ghr	4.27537	Errfi1	5.88506
Snap47	Efemp1	Ugp2	Zfp62	Pus10	Cabp7		Gprin2	-0.967114	Asb16	0.427311	Wdr52	4.91719	Pdia5	2.39442	Xkr6	5.23573	Ttc34	0.469638
Zfp867	Ppp4r3b	Otx1	Mgat1	Rel	Nf2		Ccdc9	3.88772	Gpr156	0.588471	Catsper2	2.03056	Vwa1	3.83373	Cers1	1.75157	Ttr	11.3242
Mprip	Cfap36	Ehbp1	Cnot6	Papolg	Nipsnap1		Plp1	7.69914	Cep41	2.6488	Slc29a1	2.52501	Tnfsf10	2.19722	Wnt3	1.5079	Jdp2	3.97222
Pld6	Ccdc88a	Tmem17	Mapk9	Bcl11a	Thoc5		Tll1	2.33794	Tssk4	0.038255	Cyp11a1	1.36577	Cd302	4.14437	Sp8	1.5079	Cstad	0.138102
Nt5m	Prorsd1	B3gnt2	Rnf130	Ccdc85a	Ap1b1		Kif9	3.32461	Fzd4	2.51481	Dsg2	3.13303	Ppp1r15a	3.58997	Csrnp1	2.2366	Rilp	0.818717
Med9	Mtif2	Commd1	Tbc1d9b	Efemp1	Nefh		3110052M02Rik	3.19873	6720489N17Rik	0.588471	Gm21807	-1.24419	C030017K20Rik	1.69713	Hps5	0.653632	Gng10	0.008183
Rasd1	Clhc1	Cct4	Mrnip	Pnpt1	Rasl10a		Enpep	2.33794	P2rx3	0.588471	Zfp51	2.74964	Gjc2	2.27936	Dok2	0.262249	Spata32	0.56514
Rai1	Rtn4	Fam161a	Mgat4b	Ppp4r3b	Gas2l1		Cmss1	1.62416	Prkcsh	4.77238	Fdx1	2.27497	Mid1	2.84911	Grk4	3.35681	Dbh	-0.134605
Srebf1	Eml6	Usp34	Ltc4s	Cfap36	Ewsr1		BC067074	3.52524	Clrn1	0.51014	Mybl1	2.17525	Angptl2	3.17299	Atad2	2.98684	Emid1	0.138102
Tom1l2	Sptbn1	Pus10	Maml1	Ccdc88a	Kremen1		Cwc15	4.46185	3110082I17Rik	1.20056	Cd320	3.54621	Ak9	2.87576	Gm9989	0.583392	Mlf1ip	1.53658
Atpaf2	Acyp2	Rel	Hnrnph1	Prorsd1	Xbp1		Ifitm7	0.069928	3830403N18Rik	-1.35416	3110007F17Rik	0.778328	Gm3558	0.036992	Fbxo47	1.01554	Mamdc4	1.09957
Gid4	Psme4	Papolg	Rufy1	Mtif2	Mrps24		Rmdn2	3.00817	Wdr66	2.73742	Igf2	6.12319	Col20a1	2.87576	Noxred1	1.26029	Gm17334	-1.19404
Myo15a	Gpr75	Bcl11a	Zfp454	Rtn4	Dbnl		Rbm41	4.45793	Slc4a2	5.1854	H2-M3	-0.423924	Chdh	3.54086	Scp2	6.16828	Calml4	3.66246
Alkbh5	Erlec1	Ccdc85a	Clk4	Eml6	Pgam2		Atp7a	4.77707	Cry1	3.86153	Asb16	0.866229	Pim1	-0.401072	Rph3al	1.87431	Tm6sf2	2.63644
Llgl1	Asb3	Pnpt1	Phykpl	Sptbn1	Aebp1		Pygl	2.4992	Adamtsl2	1.38744	Gpr156	0.477048	Map3k7cl	0.372562	Cyp4f17	1.65214	H6pd	3.53851
Flii	Stc2	Ppp4r3b	Hnrnpab	Acyp2	Ykt6		Col8a2	3.59829	Gm10093	-0.077944	Cep41	2.82835	Fhod1	1.69713	Fau	5.38256	Mad1l1	3.56185
Smcr8	Bod1	Cfap36	Nhp2	Psme4	Camk2b		Lrguk	1.92605	Lhfpl4	5.55814	Fzd4	2.03056	Elk3	0.036992	Wdr96	3.16574	Hspb8	3.92799
Tmem11	Cpeb4	Ccdc88a	Rmnd5b	Gpr75	Nudcd3		Ppp1r3d	2.26802	Pcp4	0.339436	6720489N17Rik	0.021151	Armc3	0.514994	Tcf15	-0.413472	Nmi	1.2793
Natd1	Nsg2	Mtif2	Sec24a	Erlec1	Ddx56		Slc37a1	1.90317	En2	0.427311	P2rx3	0.635538	Pla2g5	0.819534	Enkd1	1.78325	Ccdc81	1.83367
Map2k3	Snrnp25	Clhc1	Jade2	Chac2	Tmed4		Tec	1.44565	Pm20d2	3.01777	Prkcsh	5.13412	Ptch2	0.581262	Mrpl42	-0.276538	H2-Q7	0.65471
Kcnj12	Rhbdf1	Rtn4	Ube2b	Stc2	Ogdh		Scml2	1.12811	Zbtb26	4.55063	Clrn1	1.06507	Gm7276	-1.24657	Ccdc114	2.36776	Fam46a	4.33263
Usp22	Nprl3	4931440F15Rik	Skp1	Bod1	Zmiz2		Zbtb48	2.43684	Myo1f	1.8358	3110082I17Rik	1.93216	Foxj1	2.67796	Mvb12a	2.90281	Cmtr1	2.29019
Mapk7	Hba-a2	Eml6	Vdac1	Cpeb4	Purb		Trim56	3.10158	Pinx1	2.66697	Wdr66	2.95403	Sp110	1.36225	Tas2r108	-0.036407	Spata24	1.53658
B9d1	Sh3pxd2b	Sptbn1	9530068E07Rik	Nsg2	Myo1g		Hmgn5	3.25403	Vwa3a	2.89984	Slc4a2	4.95276	Ttll9	0.214512	Ccdc62	3.00038	Pgm5	2.63644
Ulk2	Efcab9	Psme4	Fstl4	Snrnp25	Ccm2		Lbp	3.80374	Pde6h	1.55287	Cry1	3.49198	Whrn	4.27525	Tfap4	0.262249	Rorc	1.71375
Akap10	Stk10	Gpr75	Hspa4	Rhbdf1	Nacad		Sh3gl1	3.97259	2310042D19Rik	-0.204327	Adamtsl2	1.78205	Lefty1	1.83932	Gm973	3.12922	Chst5	0.257282
Specc1	Fbxw11	Erlec1	Zcchc10	Mpg	Tbrg4		Mpp7	2.80098	Chadl	1.04257	Gm10093	1.23979	Hes6	2.06451	Olfr558	0.070164	Ckap2l	0.008183
Adora2b	Npm1	Stc2	Aff4	Hba-a2	Adcy1		Ifrd2	1.24191	Pnpt1	1.98806	Lhfpl4	5.74841	Shkbp1	3.77123	Olfr539	0.845903	Cd163	0.367364
Ttc19	Slit3	Cpeb4	Uqcrq	Ubtd2	Igfbp3		Sorbs3	3.73414	Rab4b	0.427311	Pcp4	2.30674	Plcg2	3.27662	Phyhd1	0.509557	Gpr25	1.7948
Ncor1	Pank3	Nsg2	Sowaha	Efcab9	Tns3		Eogt	3.33319	4833427G06Rik	0.245858	Pm20d2	1.93216	Zfhx3	4.7738	Mab21l1	-0.733835	Atp11c	5.6629
Pigl	Fbll1	Snrnp25	Septin8	Stk10	Ddc		Chga	4.63154	Polr3d	3.54535	Zbtb26	4.38133	Kif7	1.72671	Slc13a4	4.52531	Stac3	1.33456
Cenpv	Rars	Rhbdf1	Kif3a	Fbxw11	Cobl		Lrriq1	3.70135	Alg12	3.17835	Myo1f	0.94908	Timm8b	-1.80033	Uimc1	2.58104	Tspan11	0.469638
Ubb	Wwc1	Ubtd2	Rad50	Fgf18	Vstm2a		Zscan29	3.57676	Ccdc55	3.92328	Pinx1	2.62918	Slc25a15	4.56859	P2ry6	0.72061	Ccdc141	5.88506
Trpv2	Mat2b	Efcab9	Slc22a5	Npm1	Cnrip1		Golga4	6.62835	Rgs6	1.73609	Vwa3a	2.52501	Ccdc146	2.04116	Wdr13	3.68495	Stk10	2.78269
Zfp287	Gabrg2	Fbxw11	Pdlim4	Slit3	Ppp3r1		Gpr98	4.25604	Nav1	0.733423	Chadl	1.89084	Sod3	2.78025	Bcor	4.90594	Lyzl4	1.4391
Cox10	Gabra1	Npm1	P4ha2	Pank3	Pno1		Mrpl19	4.58916	Crocc	5.03267	Pnpt1	2.03056	Slc35c2	1.11627	Dlx6	1.98743	Slc38a3	5.7695
Elac2	Gabrb2	Slit3	Acsl6	Fbll1	Etaa1		Ttyh2	4.72583	Ccdc9	3.83767	Rab4b	0.234371	Tmem202	0.214512	Stra13	2.44901	Zfand2b	2.7424
Map2k4	Pttg1	Pank3	Meikin	Rars	Spred2		Ppard	3.16065	Plp1	8.09208	4833427G06Rik	-0.649175	Ecm1	2.53481	Epor	0.904692	Prrg4	1.71375
Zkscan6	Slu7	Fbll1	Rapgef6	Wwc1	Actr2		Mb21d1	0.915915	Tll1	2.34469	Nxpe2	-0.057551	B230317F23Rik	2.01742	Tbc1d10c	-0.925363	Tnfrsf14	0.138102
Dnah9	Ccnjl	Rars	Cdc42se2	Mat2b	Rab1a		Neu4	2.48386	Kif9	3.10029	Polr3d	3.75059	Abcc3	1.78411	Galnt15	2.5629	Gna14	-0.293092
Shisa6	Fabp6	Wwc1	Gpx3	Gabrg2	Cep68		Tc2n	2.26802	3110052M02Rik	2.47412	Alg12	2.7839	Rhbdf2	0.705311	Atp5l	1.06792	Acot5	1.2793
Sco1	Pwwp2a	Mat2b	Tnip1	Gabra1	Sertad2		Ticam1	1.94857	Enpep	2.49461	Ccdc55	3.34674	Exosc5	2.29918	Neurod2	5.93788	Cwc27	4.27023
Gas7	Ttc1	Gabrg2	Anxa6	Gabrb2	Aftph		B9d2	1.47698	Cmss1	1.34294	9030624G23Rik	-0.776528	Tcerg1l	3.74256	Bok	4.11657	Irx5	-0.471164
Rcvrn	Rnf145	Gabra1	Gm2a	Pttg1	Vps54		Snx9	3.7406	BC067074	3.98974	Rgs6	2.53845	Nfxl1	1.39946	Caps2	0.509557	2410131K14Rik	4.59271
Stx8	Ebf1	Gabrb2	Slc36a1	Slu7	Ugp2		Nefm	6.05578	Cwc15	4.10747	Nav1	0.095781	Zfp219	3.83373	Klf4	2.63412	Gm27029	-0.674351
Pik3r6	Clint1	Pttg1	Gria1	Ccnjl	Wdpcp		Iba57	1.90317	Ifitm7	0.662767	Crocc	4.98503	Tnfrsf25	4.64804	Errfi1	6.36951	Vegfa	5.767
Myh10	Lsm11	Slu7	Fam114a2	Fabp6	Otx1		Mki67	1.80784	Rmdn2	2.75451	Ccdc9	3.99928	Isoc2a	2.7373	Ttc34	0.961179	0610010K14Rik	0.965968
Ndel1	Adam19	Ccnjl	Mfap3	Pwwp2a	Ehbp1		Nt5dc1	2.7506	Rbm41	4.85788	Plp1	7.36735	Loxl1	1.57235	Ttr	10.3812	Gm13152	2.59178
Arhgef15	Fndc9	Fabp6	Sap30l	Ttc1	B3gnt2		Card6	2.0562	Atp7a	5.05353	Tll1	2.41272	Ptrh1	-0.847396	Jdp2	4.08515	Dgkk	2.42359
Slc25a35	Cyfip2	Pwwp2a	Larp1	Rnf145	Zrsr1		Mrps18a	3.45619	Pygl	2.34469	Kif9	3.16804	Rps27a	6.29164	Cstad	1.5079	Cited4	0.138102
Rangrf	Trim41	Ttc1	Cnot8	Clint1	Commd1		Arrdc2	2.99741	Col8a2	2.97466	3110052M02Rik	3.56604	Ankef1	1.47112	Rilp	0.961179	Dhrs11	1.48866
Pfas	Zfp62	Adra1b	Zfp692	Lsm11	Cct4		Tbata	2.42082	Lrguk	2.09925	Enpep	1.97233	Mfrp	3.83373	Spata32	-0.925363	Harbi1	3.00334
Ctc1	Mgat1	Rnf145	Zfp672	Adam19	Fam161a		Insl5	-0.664027	Ppp1r3d	1.62897	Cmss1	1.86973	Hmga1	3.51566	Mlf1ip	2.2366	Htr1f	2.72182
Aurkb	Cnot6	Ebf1	Sh3bp5l	Fndc9	Xpo1		Gng5	4.02652	Slc37a1	1.89865	BC067074	3.25202	Sardh	3.57379	Mamdc4	1.5079	Tceanc2	4.39245
Borcs6	Mapk9	Clint1	Gm12258	Cyfip2	Usp34		Trp73	1.53767	Tec	1.59142	Cwc15	4.51652	Fhad1	3.58997	Gm17334	-0.276538	Zfp948	5.04603
Per1	Rnf130	Lsm11	Zfp39	Trim41	Ahsa2		Tbc1d4	3.99441	Scml2	0.926736	Ifitm7	0.778328	Cir1	5.32861	Calml4	2.01437	Oaz2	1.2793
Aloxe3	Tbc1d9b	Thg1l	Rnf187	Trim7	0610010F05Rik		Aldh1l1	4.9489	Zbtb48	1.34294	Rmdn2	2.92362	Alg8	2.37587	Tm6sf2	1.95997	Nudt22	1.58295
Alox12b	Sqstm1	Adam19	H2bc27	Zfp62	Pus10		Slc2a1	5.5683	Trim56	3.55514	Rbm41	4.52329	Resp18	-0.535069	H6pd	3.27004	Lingo4	0.469638
Alox8	Mgat4b	Fndc9	H2ac25	Cnot6	Papolg		Uqcr11	4.23787	Hmgn5	3.4852	Atp7a	4.59258	Gm21685	4.25509	Tead4	-0.276538	Gm7729	0.367364
Cntrob	Maml1	Cyfip2	Trim17	Mapk9	Bcl11a		Atp11a	2.93109	Lbp	4.03939	Pygl	2.45586	Dnajb1	5.06184	Mad1l1	3.41863	Ankfn1	2.65826
Trappc1	Canx	Med7	Trim11	Rnf130	Vrk2		Cul4b	3.52524	Sh3gl1	3.9532	Col8a2	3.81827	Pgap3	1.20301	Hspb8	3.65957	6430503K07Rik	-0.293092
Kcnab3	Hnrnph1	Trim41	Gjc2	Tbc1d9b	Ccdc85a		Akr1b10	3.41634	Mpp7	3.00354	Lrguk	1.73612	Ydjc	2.72269	Nmi	1.61741	Pycard	0.008183
Chd3	Rufy1	Trim7	Mrpl55	Mrnip	Pnpt1		Hrsp12	4.60342	Ifrd2	1.09718	Ppp1r3d	2.98381	Il6ra	3.8132	Ccdc81	0.784617	Gm3248	1.38778
Cyb5d1	Zfp354c	Psme2b	Arf1	Sqstm1	Cfap36		Myo5b	4.51941	Sorbs3	3.63112	Slc37a1	2.06812	Mafk	3.17299	Fam46a	4.22436	Gm4491	0.257282
Naa38	Clk4	Tgtp1	Snap47	Mgat4b	Ccdc88a		Tcirg1	2.91974	Eogt	3.38998	Tec	1.45352	Gpam	3.96363	Cmtr1	2.5629	Prorsd1	2.07991
Tmem88	Col23a1	Zfp62	Jmjd4	Ltc4s	Prorsd1		Cebpa	2.11712	Chga	4.31754	Scml2	0.684722	Kcnk6	1.94377	Spata24	1.21455	Syce2	0.65471
Efnb3	Hnrnpab	Mgat1	Zfp867	Maml1	Clhc1		Gltscr1	3.65417	Lrriq1	3.55514	Zbtb48	2.93383	Mum1l1	3.35448	Draxin	1.06792	Creb3l2	3.60743
Wrap53	Nhp2	Flt4	Mprip	Hnrnph1	Rtn4		Zpbp	0.960925	Zscan29	3.7208	Trim56	2.93383	Mei4	0.214512	Pgm5	2.78257	Hirip3	2.56892
Trp53	Rmnd5b	Mapk9	Pld6	Rufy1	4931440F15Rik		Ltv1	3.66101	Golga4	6.57637	Hmgn5	3.09715	Sdpr	4.61678	Rorc	1.58182	Gm21967	4.80811
Atp1b2	Sec24a	Rasgef1c	Flcn	Zfp354c	Eml6		Dnajc21	4.66252	Gpr98	4.71242	Lbp	3.87764	Eltd1	5.06764	Ckap2l	0.653632	Rbm47	4.06499
Sat2	Jade2	Rnf130	Med9	Zfp454	Sptbn1		Spata13	4.67945	Mrpl19	4.65897	Sh3gl1	4.08879	Lipc	0.372562	Cd163	1.93198	Tpx2	0.89422
Fxr2	Cdkn2aipnl	Tbc1d9b	Rasd1	Col23a1	Psme4		Klhl36	0.366069	Ttyh2	4.77238	Mpp7	2.53845	Ccdc102a	0.514994	Gpr25	1.5079	Agmo	3.33678
Sox15	Ube2b	Mrnip	Rai1	Hnrnpab	Gpr75		Pum2	2.68505	Ppard	2.853	Ifrd2	1.75927	Spag16	1.83932	Atp11c	5.39286	Zfp960	2.49808
Cd68	Ppp2ca	Sqstm1	Srebf1	Nhp2	Asb3		Zbbx	2.61637	Mb21d1	1.04257	Sorbs3	3.9448	Folr1	3.66064	Stac3	1.34763	Mtf1	5.80173
Senp3	Skp1a	Mgat4b	Tom1l2	Rmnd5b	Chac2		Myh14	4.46576	Neu4	2.91512	Eogt	3.37698	Rgl3	0.763553	Ccdc141	5.82636	Slfn5	2.63644
Tnfsf13	Vdac1	Ltc4s	Gid4	Sec24a	Stc2		Wbscr22	3.03998	Tc2n	2.97466	Chga	4.81597	Herc6	3.31607	Stk10	3.5716	Klhl6	1.09957
Polr2a	9530068E07Rik	Maml1	Drg2	Jade2	Bod1		Mamdc2	1.44565	Ticam1	1.66557	Clec4a1	-0.776528	Sord	4.8157	Lyzl4	1.30462	Catsper3	0.257282
Zbtb4	Fstl4	Hnrnph1	Myo15a	Cdkn2aipnl	Cpeb4		Dlec1	2.13687	B9d2	0.662767	Lrriq1	3.50573	Micall1	3.75697	Slc38a3	4.82073	Tekt1	2.44885
Chrnb1	Hspa4	Rufy1	Alkbh5	Ube2b	4930524B15Rik		Maz	5.26155	Snx9	4.10747	Zscan29	3.52611	Notch4	2.60019	Zfand2b	2.73476	Irf9	4.41184
Fgf11	Zcchc10	Zfp354c	Llgl1	Ppp2ca	Nsg2		Il18bp	3.17027	Nefm	6.04327	Golga4	6.56288	Mkrn3	-0.278471	Prrg4	2.04082	Star	2.01374
Spem1	Aff4	Zfp454	Flii	Skp1a	Snrnp25		Kcng2	3.49496	Iba57	1.80333	Gpr98	4.06576	Gm5093	-1.80033	Tnfrsf14	0.583392	Parvg	2.63644
Nlgn2	Uqcrq	BC049762	Tmem11	Vdac1	Mpg		Gpt	2.60223	Mki67	2.51481	Mrpl19	4.35118	H2-K1	4.64029	Gna14	1.11847	Vps39	2.49808
Tmem256	Sowaha	Col23a1	Natd1	9530068E07Rik	Hba-a2		Ocln	4.45793	Nt5dc1	2.82091	Ttyh2	4.61496	4930523C07Rik	0.975515	Acot5	1.16731	Taf1d	1.162
Plscr3	Sept8	Phykpl	Map2k3	Fstl4	Ubtd2		Cad	3.79133	Card6	2.63041	Ppard	3.37698	Lepre1	3.36392	Cwc27	3.84361	Ptpn6	1.33456
Neurl4	Kif3a	Hnrnpab	Kcnj12	Hspa4	Efcab9		Tgm2	1.31307	Mrps18a	3.0458	Mb21d1	0.732284	Sik1	4.14984	2410131K14Rik	4.52062	Ccdc79	0.965968
Gps2	Il13	Nhp2	Tnfrsf13b	Zcchc10	Stk10		Reep4	0.431493	Arrdc2	3.67666	Neu4	2.30674	Tmem8b	3.2463	Vegfa	5.62036	Hist1h2ak	1.67146
Eif5a	Rad50	Rmnd5b	Usp22	Aff4	Fbxw11		Ppp1r3b	1.92605	Tbata	2.7881	Tc2n	1.45352	Egr1	6.96059	0610010K14Rik	0.653632	Ifit2	3.33678
Ybx2	Acsl6	Sec24a	Aldh3a2	Uqcrq	Smim23		Hpgd	3.13142	Insl5	-0.204327	Ticam1	2.14041	Lgr6	1.16029	Gm13152	2.61664	4930444P10Rik	0.56514
Phf23	Fnip1	Jade2	Mapk7	Sowaha	Npm1		Carf	1.87992	Gng5	3.4954	B9d2	1.58887	Acox2	1.28483	Dgkk	1.30462	Gm13139	3.26748
Dvl2	Rapgef6	Cdkn2aipnl	B9d1	Sept8	Kcnmb1		Wdr25	2.45268	Trp73	1.1498	Snx9	3.37698	Ddx11	0.64462	Cited4	0.169401	Barx2	-0.471164
Dlg4	Cdc42se2	Ube2b	Ulk2	Kif3a	Slit3		Zfp324	3.45619	Tbc1d4	4.23471	Nefm	5.98031	Gipc2	0.128481	Dhrs11	2.19009	Stra6	3.17967
Asgr1	Hint1	Ppp2ca	Akap10	Il4	Pank3		Trim30d	1.00457	P2ry2	-0.204327	Iba57	1.992	Gstt3	1.16029	Harbi1	2.16626	Aoc2	2.39788
Slc16a11	Gpx3	Skp1a	Specc1	Rad50	Fbll1		Rab38	-0.014687	Aldh1l1	4.72981	Mki67	1.68869	Hspa5	8.6497	Htr1f	2.5629	Mt1	6.10956
Slc16a13	Gm2a	Tcf7	Adora2b	Slc22a4	Rars		Aspdh	0.554063	Slc2a1	5.75779	Nt5dc1	2.91335	Olfr556	-1.24657	Tceanc2	4.43346	Fam203a	0.739043
Rnasek	Slc36a1	Vdac1	Ttc19	Acsl6	Wwc1		Slc16a10	2.48386	Uqcr11	3.75517	Card6	1.7126	Slc5a7	0.214512	Zfp948	5.47275	Zfp689	2.20379
Pelp1	Sparc	9530068E07Rik	Ncor1	Fnip1	Mat2b		4930518I15Rik	1.5959	Atp11a	2.8046	Mrps18a	3.52611	Dusp5	3.92588	Oaz2	2.04082	Cnnm3	1.75485
Pld2	Atox1	Fstl4	Pigl	Rapgef6	Gabrg2		Dzip1	0.771789	Cul4b	3.42243	Arrdc2	2.30674	Tcf7l1	1.86615	Nudt22	1.06792	Bfsp2	1.75485
Mink1	Nmur2	Hspa4	Cenpv	Cdc42se2	Gabra1		Wdr78	4.17717	Akr1b10	3.42243	Tbata	2.08653	Irak3	-0.060693	Gm7729	-0.564779	Notum	-0.471164
4930544D05Rik	Gria1	Zcchc10	Ubb	Hint1	Gabrb2		Enpp2	10.2128	Hrsp12	4.54573	Insl5	-0.423924	Glipr1	-0.847396	Ankfn1	0.509557	Leo1	3.9809
Slc25a11	Mfap3	Aff4	Trpv2	Gpx3	Atp10b		Mc4r	1.92605	Myo5b	4.45456	Gng5	3.99928	Rbks	2.19722	6430503K07Rik	-0.413472	Klhl33	1.09957
Pfn1	Galnt10	Uqcrq	Cox10	Tnip1	Pttg1		Cldn2	3.53272	Tcirg1	2.49461	Trp73	1.91165	Ctsc	4.52296	Pycard	0.845903	Prg4	0.469638
Spag7	Sap30l	Shroom1	Elac2	Gm2a	Slu7		Nde1	4.15797	Cebpa	0.662767	Tbc1d4	4.01859	Gipr	0.445535	Gm3248	0.784617	3300002I08Rik	2.8411
Kif1c	Larp1	Sowaha	Arhgap44	Slc36a1	Ccnjl		Alas2	1.90317	Gltscr1	3.52558	Aldh1l1	5.20958	Calcrl	5.61426	Gm4491	-0.564779	Slc4a5	5.12651
Zfp3	Cnot8	Sept8	Map2k4	Sparc	Pwwp2a		Lrrc32	1.12811	Zpbp	1.2496	Slc2a1	5.45435	Baiap2l1	2.51799	Prorsd1	1.93198	Cyp27b1	0.008183
Rabep1	Gemin5	Kif3a	Zkscan6	Atox1	Ttc1		Cartpt	-0.200439	Ltv1	3.65862	Uqcr11	4.45406	Ccdc159	3.76412	Syce2	-0.413472	Scgn	-0.674351
Nup88	Irgm2	Slc22a5	Dnah9	G3bp1	Rnf145		Ntng1	1.27793	Dnajc21	4.93111	Atp11a	3.1152	Mobp	6.09586	Creb3l2	2.85888	Otx2	3.95469
C1qbp	Zfp692	Slc22a4	Shisa6	Gria1	Clint1		Pfkfb3	4.43019	Spata13	4.85393	Cul4b	3.73316	AK157302	-0.682797	Hirip3	3.41863	Ak2	2.80242
Dhx33	Zfp672	P4ha2	Gas7	Mfap3	Lsm11		Trim8	5.48793	Klhl36	0.733423	Akr1b10	3.55285	Steap1	1.66693	Gm21967	5.28635	Ccdc112	2.98619
6330403K07Rik	Sh3bp5l	Acsl6	Rcvrn	Sap30l	Adam19		Gstm4	1.92605	Pum2	2.53473	Hrsp12	4.43622	Rsph4a	3.62966	Rbm47	3.45842	Vsig10l	1.33456
Wscd1	Fam183b	Fnip1	Stx8	Larp1	Fndc9		Ppp1r36	0.149854	Zbbx	2.70263	Myo5b	4.57312	Gpr56	1.63609	Tpx2	2.32535	P2rx5	0.367364
Pimreg	Zfp39	Rapgef6	Pik3r6	Cnot8	Cyfip2		Edf1	4.22408	Myh14	4.65897	Tcirg1	2.64169	Tysnd1	1.53939	Agmo	3.18957	Ngfr	0.56514
Pitpnm3	Rnf187	Cdc42se2	Myh10	Gemin5	Timd4		Ccdc170	1.41363	Wbscr22	3.05962	Cebpa	2.25882	Ghr	5.60633	Zfp960	1.61741	Slc25a47	0.257282
Mybbp1a	Hist3h2ba	Hint1	Ndel1	Irgm2	Trim41		Emcn	2.68505	Mamdc2	1.51326	Gltscr1	3.81827	Xkr6	5.51392	Gpr182	1.11847	4930415F15Rik	0.008183
Spns2	Hist3h2a	Gpx3	Arhgef15	Zfp692	Trim7		Madd	3.70135	Dlec1	1.43061	Zpbp	0.166739	Cers1	1.57235	Mtf1	5.78588	Cyp27a1	1.03432
Ube2g1	Trim11	Tnip1	Slc25a35	Zfp672	Zfp62		Nfatc1	2.72474	Maz	5.14385	Ltv1	3.64892	Wnt3	0.214512	Slfn5	3.75852	Fbxl19	3.72583
Cyb5d2	Gjc2	Anxa6	Rangrf	Sh3bp5l	Scgb3a1		Dnah6	4.68617	Il18bp	3.29973	Dnajc21	4.60221	Ptgdr	0.128481	Klhl6	1.06792	Micall2	0.739043
Zzef1	Mrpl55	Gm2a	Pfas	Zfp39	Cnot6		Mtrf1l	3.2809	Kcng2	3.4852	Spata13	4.5567	Efcab4a	0.581262	Itga2b	0.845903	Gm10530	2.39788
Atp2a3	Arf1	Sparc	Ctc1	Rnf187	Mapk9		Phf13	3.56951	Gpt	2.01667	Klhl36	1.23979	Sp8	1.07086	Catsper3	-0.925363	Pank2	1.53658
Camkk1	Snap47	Atox1	Borcs6	Hist3h2ba	Rasgef1c		Clec1a	1.67907	Ocln	4.71242	Pum2	2.60384	Csrnp1	2.84911	Tekt1	2.28166	Lrrc6	2.47368
Ncbp3	Jmjd4	G3bp1	Vamp2	Hist3h2a	Rnf130		Trim71	1.56708	Cad	3.85362	Zbbx	2.8063	Hps5	0.514994	Irf9	4.30841	Slc2a12	5.30657
Itgae	Mprip	Gria1	Per1	Trim11	Tbc1d9b		Vsig2	0.821448	Tgm2	0.80078	Myh14	4.21552	Grk4	3.36392	Star	1.68605	Mpv17l2	1.22185
Or1d2	Flcn	Fam114a2	Alox8	Gjc2	Mrnip		Rtn4rl2	2.68505	Reep4	0.985817	Wbscr22	2.98381	Atad2	3.09574	Parvg	2.93136	Zbtb16	6.86102
Rap1gap2	Nt5m	Mfap3	Cntrob	Mrpl55	Sqstm1		Sipa1	2.5294	Ppp1r3b	2.36708	Mamdc2	0.822948	Gm9989	0.975515	Vps39	3.35681	Ybey	2.34504
Ccdc92b	Med9	Galnt10	Trappc1	Arf1	Mgat4b		Kmt2b	4.26504	Hpgd	3.34557	Dlec1	2.25882	Fbxo47	0.975515	Taf1d	1.06792	Rgs11	4.79832
Cluh	Rasd1	Sap30l	Kcnab3	Jmjd4	Hnrnph1		Eif4ebp2	4.10882	Carf	1.95887	Maz	5.39832	Noxred1	2.06451	Ptpn6	1.30462	Utp14b	6.74726
Pafah1b1	Rai1	Larp1	Chd3	Mprip	Rufy1		Gmnc	3.54015	Wdr25	2.53473	Il18bp	3.19375	Scp2	7.29949	Ccdc79	1.11847	Heatr1	4.69126
Mnt	Srebf1	Cnot8	Cyb5d1	Pld6	Zfp354c		Sox21	2.54426	Zfp324	3.72947	Kcng2	3.42119	Rph3al	1.39946	Hist1h2ak	0.72061	Unc13d	0.89422
Sgsm2	Tom1l2	Zfp692	Naa38	Flcn	Zfp454		Slc2a6	0.72036	Trim30d	0.985817	Gpt	2.72634	Cyp4f17	1.02397	Ifit2	4.17744	Ddx60	1.53658
Smg6	Gid4	Zfp672	Kdm6b	Nt5m	Zfp354a		Ltbp3	4.04754	Rab38	-0.496109	Ocln	4.42541	Fau	5.81005	4930444P10Rik	0.509557	Pip5kl1	0.257282
Srr	Alkbh5	Sh3bp5l	Efnb3	Med9	BC049762		Zfpm1	3.50259	Aspdh	-0.667601	Cad	3.81827	Cldn9	-1.24657	Gm13139	3.4682	Shroom1	2.54569
Hic1	Llgl1	Olfr314	Wrap53	Rasd1	Phykpl		Tmppe	4.1676	Slc16a10	2.91512	Tgm2	1.42486	Wdr96	3.07289	Stra6	2.42912	Incenp	3.47844
Rtn4rl1	Flii	Rnf187	Atp1b2	Rai1	Hnrnpab		Nefh	4.44611	4930518I15Rik	2.25147	Reep4	0.531836	Papln	0.925372	Aoc2	2.76681	Suv420h2	3.38992
Rpa1	Tmem11	Hist3h2ba	Sat2	Srebf1	Nhp2		Vegfb	3.73414	Dzip1	0.985817	Ppp1r3b	1.73612	Enkd1	1.53939	Mt1	4.78987	Abca4	5.36745
Serpinf1	Natd1	Hist3h2a	Sox15	Tom1l2	0610009B22Rik		Kdm6b	5.11492	Wdr78	4.42818	Hpgd	3.1152	Mrpl42	-0.060693	Fam203a	1.90344	Prelid2	-0.674351
Serpinf2	Map2k3	Trim17	Polr2a	Gid4	Jade2		Abi3	1.00457	Enpp2	10.627	Carf	1.5092	Ccdc114	2.66274	Cnnm3	1.34763	AA986860	1.75485
Wdr81	Usp22	Trim11	Zbtb4	Alkbh5	Cdkn2aipnl		1700017B05Rik	3.6265	Mc4r	2.32194	Wdr25	2.59099	Mvb12a	3.15134	Bfsp2	1.30462	Samd1	3.59617
Slc43a2	Aldh3a2	Iba57	Chrnb1	Flii	Ube2b		Brat1	1.47698	Cldn2	3.78042	Zfp324	3.30803	Ccdc62	2.56787	Notum	0.262249	Ppp1r3f	3.51478
Pitpna	Rnf112	Gjc2	Fgf11	Tmem11	Ppp2ca		Lrrc9	2.65797	Nde1	4.17884	Trim30d	0.988787	Tfap4	1.39946	Leo1	3.83608	BC100451	0.89422
Inpp5k	Mfap4	Mrpl55	Spem1	Natd1	Skp1a		Pigh	3.12154	Alas2	1.80333	Rab38	0.095781	Gm973	3.76412	Klhl33	0.904692	Lsm2	1.94439
Myo1c	Mapk7	Arf1	Tmem256	Map2k3	Vdac1		Shpk	1.62416	Lrrc32	0.427311	Aspdh	1.23979	Olfr558	0.873423	Prg4	0.72061	E130012A19Rik	3.59617
Crk	B9d1	Snap47	Plscr3	Usp22	Fstl4		Bcl9l	4.32222	Cartpt	-0.667601	Slc16a10	2.30674	Phyhd1	1.28483	3300002I08Rik	2.82884	Mapk15	1.71375
Ywhae	Fam83g	Mprip	Neurl4	Rnf112	Hspa4		Wrap53	3.02946	Ntng1	1.34294	4930518I15Rik	1.7126	Mab21l1	0.445535	Slc4a5	4.24725	Zfp579	3.28161
Rph3al	Ulk2	Pld6	Gps2	Mfap4	Zcchc10		Arfrp1	1.62416	Pfkfb3	4.53588	Dzip1	0.635538	Slc13a4	4.86973	Cyp27b1	0.349481	mt-Nd4l	4.23436
Liat1	Akap10	Flcn	Eif5a	Mapk7	Aff4		Dyx1c1	0.431493	Trim8	5.41232	Wdr78	3.93467	Uimc1	2.91483	Otx2	3.07906	Apoo-ps	1.03432
Rflnb	Specc1	Med9	Ctdnep1	B9d1	Uqcrq		1500009C09Rik	1.27793	Gstm4	1.92907	Enpp2	9.82945	P2ry6	1.60457	Ak2	2.2593	Gyltl1b	0.818717
Vps53	Adora2b	Rasd1	Phf23	Fam83g	Sowaha		Efcab1	2.64424	Ppp1r36	0.145787	Mc4r	2.01141	Wdr13	3.23605	Ccdc112	2.87367	Pappa	1.75485
Tlcd3a	Ttc19	Rai1	Dvl2	Prpsap2	Sept8		Col8a1	4.34786	Edf1	3.89274	Cldn2	3.30803	Bcor	4.92181	Vsig10l	-0.036407	Cenpa	0.818717
Mrm3	Ncor1	Srebf1	Dlg4	Ulk2	Kif3a		Dtna	3.2174	Ccdc170	1.73609	Nde1	4.09335	Dlx6	0.705311	P2rx5	1.01554	Arhgap31	5.86174
Timm22	Ubb	Tom1l2	Asgr1	Specc1	Il13		Lrrc71	0.869454	Emcn	2.61177	Alas2	1.93216	Stra13	2.19722	Ngfr	0.845903	Lrrc2	0.65471
Abr	Trpv2	Gid4	Slc16a13	Adora2b	Slc22a5		B3gnt5	0.771789	Madd	3.94577	Lrrc32	1.17242	Epor	0.581262	Slc25a47	-0.733835	Gm216	1.97948
Efcab5	Pmp22	Drg2	0610010K14Rik	Ttc19	Acsl6		Ndst3	1.5959	Nfatc1	2.8046	Cartpt	0.166739	Tbc1d10c	-1.03322	4930415F15Rik	-0.925363	Asl	2.89723
Ssh2	Cox10	Alkbh5	Pelp1	Ncor1	Meikin		Plvap	1.44565	Dnah6	4.87752	Ntng1	1.02743	Galnt15	2.70793	Cyp27a1	0.509557	Gpank1	2.7424
Coro6	Elac2	Llgl1	Pld2	Ubb	Fnip1		Ccdc13	1.87992	Mtrf1l	3.5841	Pfkfb3	4.3165	Atp5l	1.39946	Fbxl19	3.39832	Serf1	2.61428
Ankrd13b	Arhgap44	Flii	Mink1	Trpv2	Cdc42se2		Sulf1	5.43707	Phf13	2.853	Trim8	5.498	Slc14a2	-0.165477	Micall2	1.65214	Tor3a	3.1645
Taok1	Map2k4	Tmem11	4930544D05Rik	Lrrc75a	Gpx3		Tbx3	1.62416	Clec1a	0.985817	Gstm4	1.82655	Neurod2	6.61992	Chrnb1	0.904692	Cyp2r1	1.162
Nufip2	Zkscan6	Natd1	Slc25a11	Tvp23b	Anxa6		Plekhf1	1.16705	Trim71	2.45334	Ppp1r36	1.10174	Col4a4	2.17593	Gm10530	3.10436	Ccdc25	5.04189
Myo18a	Dnah9	Map2k3	Pfn1	Cox10	Slc36a3		Spag17	1.41363	Vsig2	1.34294	Edf1	4.42902	Bok	4.03631	Pank2	1.3894	1110004E09Rik	3.35025
Phf12	Shisa6	Kcnj12	Spag7	Elac2	Slc36a1		Mfsd10	1.56708	Rtn4rl2	2.47412	Ccdc170	0.94908	Caps2	0.514994	Lrrc6	2.87367	Mvp	2.54569
Dhrs13	Adprm	Aldh3a2	Kif1c	Arhgap44	Sparc		Timmdc1	3.79133	Sipa1	2.63041	Emcn	2.83926	Klf4	2.9403	Slc2a12	4.65511	Gm11992	1.97948
Flot2	Gas7	Rnf112	Zfp3	Map2k4	Atox1		Il10rb	1.92605	Kmt2b	4.4907	Madd	3.76209	Errfi1	6.32345	Psma8	-0.733835	Ddx43	-0.293092
Eral1	Rcvrn	Mfap4	Rabep1	Dnah9	G3bp1		9330161L09Rik	-0.303129	Poln	0.662767	Nfatc1	2.79514	Ttc34	0.763553	Mpv17l2	1.11847	Ifih1	3.57338
Fam222b	Stx8	Mapk7	Nup88	Shisa6	Gria1		Tbccd1	2.82553	Eif4ebp2	4.28262	Dnah6	4.50287	Ttr	10.7237	Zbtb16	7.24917	Klf15	4.36617
Traf4	Ntn1	B9d1	C1qbp	Tmem220	Fam114a2		Paox	0.149854	Gmnc	4.08738	Mtrf1l	3.43563	Jdp2	3.98827	Ybey	1.87431	Dmpk	4.01513
Proca1	Pik3r6	Epn2	Mis12	Sco1	Mfap3		Cox17	3.15097	Sox21	1.92907	Phf13	3.77918	Cstad	1.57235	Rgs11	4.88784	Fermt3	1.48866
Supt6	Myh10	Fam83g	6330403K07Rik	Gas7	Galnt10		Tpm3-rs7	0.821448	Slc2a6	1.29702	Clec1a	1.91165	Rilp	1.36225	Utp14b	6.4333	Acrbp	2.47368
Sdf2	Ndel1	Prpsap2	Wscd1	Rcvrn	Larp1		Pdia6	6.34927	Ltbp3	3.37901	B4galt2	0.166739	Gng10	-0.682797	Heatr1	4.59391	Hba-a2	0.138102
Bltp2	Arhgef15	Ulk2	Pimreg	Stx8	Cnot8		Gm12216	0.149854	Zfpm1	3.64035	Trim71	1.27233	Spata32	-0.535069	Unc13d	0.653632	Emilin2	1.87153
Rskr	Slc25a35	Specc1	Pitpnm3	Ntn1	Zfp692		Grk6	2.99741	Tmppe	4.04634	Vsig2	0.94908	Dbh	-0.535069	Ddx60	2.79816	A4galt	1.22185
Aldoc	Ctc1	Adora2b	Slc13a5	Pik3r6	Zfp672		Emp3	0.069928	Nefh	4.09411	Rtn4rl2	3.21901	Emid1	0.128481	Pip5kl1	0.653632	Zfp747	2.49808
Pigs	Borcs6	Ttc19	Mybbp1a	Myh10	Sh3bp5l		Rsph3b	1.16705	Vegfb	3.47492	Sipa1	2.8063	Mlf1ip	0.925372	Shroom1	1.46947	Tpcn1	2.34504
Unc119	Vamp2	Ncor1	Ube2g1	Ndel1	Trim58		Cidea	1.65187	Kdm6b	5.18855	Kmt2b	4.35499	Mamdc4	1.32406	Incenp	2.87367	Sgms2	4.41825
Slc46a1	Per1	Cenpv	Ankfy1	Arhgef15	Zfp39		Fam167a	1.31307	Abi3	0.865132	Eif4ebp2	3.90903	Gm17334	0.372562	Suv420h2	3.06624	Ap5z1	3.70501
Sarm1	Hes7	Ubb	Zzef1	Slc25a35	Rnf187		Emx2	4.13361	1700017B05Rik	3.64035	Gmnc	3.16804	Calml4	2.78025	Abca4	4.46799	Egr3	4.44988
Poldip2	Trappc1	Trpv2	Atp2a3	Rangrf	Hist3h2ba		Tjap1	2.58796	Brat1	1.43061	Sox21	2.69067	Tm6sf2	1.81198	Prelid2	0.169401	Mafg	5.49419
Tnfaip1	Kcnab3	Lrrc75a	Camkk1	Ctc1	Hist3h2a		Fam50a	3.59115	Lrrc9	2.83705	Slc2a6	-0.323246	H6pd	4.13337	AA986860	1.26029	Lyar	2.82189
Ift20	Chd3	Zfp287	Ncbp3	Borcs6	Trim17		Daxx	3.2809	Pigh	2.61177	Ltbp3	4.23216	Tead4	0.581262	Samd1	3.66808	Gm16314	0.739043
Nlk	Naa38	Pmp22	Itgae	Alox12b	Trim11		Prkcq	3.75983	Shpk	1.70126	Zfpm1	3.15064	Mad1l1	3.74256	Ppp1r3f	3.78222	Gmppb	2.95126
Lyrm9	Tmem88	Elac2	Tax1bp3	Trappc1	Gjc2		Irf2bp2	6.31285	Bcl9l	4.36838	Tmppe	4.14698	Hspb8	3.74256	BC100451	2.11739	Krt18	2.26196
Ksr1	Kdm6b	Arhgap44	Or1d2	Kcnab3	Mrpl55		Rpl23	3.272	Wrap53	2.97466	Nefh	4.4398	Nmi	2.17593	Lsm2	2.09232	Mpdu1	3.60743
Wsb1	Efnb3	Map2k4	Rap1gap2	Chd3	2310033P09Rik		Kdelc2	3.1893	Dennd2d	0.80078	Vegfb	3.98952	Ccdc81	1.11627	E130012A19Rik	3.61626	Gm4924	0.739043
Nf1	Wrap53	Zkscan6	Cluh	Naa38	Arf1		Pafah1b3	0.915915	Arfrp1	1.98806	Kdm6b	5.10957	H2-Q7	0.581262	Zfp579	2.54453	Antxr2	2.01374
Rab11fip4	Trp53	Dnah9	Pafah1b1	Tmem88	Wnt9a		Hist1h2bc	4.30486	Dyx1c1	0.80078	Abi3	0.94908	Fam46a	3.91949	mt-Nd4l	6.46661	Dmrt3	0.469638
Crlf3	Atp1b2	Shisa6	Mnt	Efnb3	Snap47		Slc46a1	1.73196	1500009C09Rik	1.20056	1700017B05Rik	3.78483	Cmtr1	1.57235	Apoo-ps	1.93198	Dnajb11	5.41949
Rhot1	Sat2	Tmem220	Sgsm2	Wrap53	Jmjd4		Zc3h3	4.1628	Efcab1	2.72013	Brat1	1.30415	Spata24	1.81198	Gyltl1b	0.262249	Tceal5	4.71227
Rhbdl3	Fxr2	Adprm	Smg6	Trp53	Mprip		Utp14a	4.63501	Col8a1	4.55063	Lrrc9	2.59099	Draxin	0.763553	Pappa	1.5079	Ccdc51	2.01374
5730455P16Rik	Sox15	Rcvrn	Srr	Atp1b2	Pld6		Aldh2	5.34669	Dtna	3.34557	Pigh	3.63648	Pgm5	2.7373	Cenpa	0.262249	Ythdc1	5.88274
Zfp207	Cd68	Stx8	Hic1	Sat2	Flcn		Mtfmt	3.47182	Lrrc71	0.926736	Shpk	1.42486	Rorc	1.60457	Arhgap31	6.00491	Erich1	2.87876
Psmd11	Senp3	Ntn1	Ovca2	Fxr2	Rasd1		Aard	0.225584	B3gnt5	0.339436	Bcl9l	4.41451	Cd163	1.11627	Lrrc2	0.904692	Olfr46	0.469638
Cdk5r1	Tnfsf13	Pik3r6	Rtn4rl1	Sox15	Rai1		Gm20695	-1.35129	Ndst3	2.04473	Wrap53	3.04159	Gpr25	1.96874	Gm216	2.0668	Eln	1.67146
Spaca3	Polr2a	Myh10	Rpa1	Cd68	Srebf1		Nfkbie	1.00457	Plvap	1.20056	Arfrp1	2.14041	Atp11c	6.25277	Asl	2.50708	Prr7	2.29019
Asic2	Zbtb4	Ndel1	Serpinf2	Senp3	Tom1l2		Des	0.821448	Ccdc13	2.38914	Dyx1c1	0.095781	Stac3	2.35707	Foxm1	1.06792	Zfp771	2.14318
Tmem132e	Fgf11	Slc25a35	Wdr81	Tnfsf13	Drc3		Ubxn11	1.80784	Sulf1	5.76202	1500009C09Rik	1.58887	Ccdc141	5.81866	Trim14	1.01554	Lzts2	4.319
Zfp830	Spem1	Rangrf	Rilp	Polr2a	Atpaf2		Ccdc138	2.7506	Tbx3	2.09925	Efcab1	2.98381	Stk10	3.35448	Gpank1	2.32535	Cox20	3.81596
Lig3	Tmem256	Pfas	Slc43a2	Zbtb4	Drg2		1110034G24Rik	2.0562	Gm10373	-1.35416	Col8a1	4.01859	Lyzl4	0.036992	Serf1	1.42999	BC007180	3.93694
Rffl	Neurl4	Ctc1	Pitpna	Chrnb1	Alkbh5		Gm14420	4.04231	Plekhf1	1.59142	Dtna	3.25202	Slc38a3	5.5863	Tor3a	2.88831	Capsl	2.96883
Nle1	Gps2	Borcs6	Inpp5k	Fgf11	Llgl1		Folh1	3.56223	Spag17	1.09718	Lrrc71	0.021151	Zfand2b	3.25648	Cyp2r1	1.65214	Swap70	4.17505
Slfn5	Eif5a	Vamp2	Myo1c	Spem1	Smcr8		Cep110	5.06425	Mfsd10	1.20056	B3gnt5	0.822948	Prrg4	2.01742	Ccdc25	4.88419	Cd59a	3.00334
Ap2b1	Ybx2	Per1	Crk	Tmem256	Tmem11		P4ha1	5.95648	Timmdc1	3.79701	Ndst3	1.68869	Tnfrsf14	-0.682797	1110004E09Rik	3.21303	Icam2	1.03432
Rasl10b	Elp5	Hes7	Ywhae	Kctd11	Map2k3		Fancf	0.915915	Il10rb	1.8358	Plvap	1.82655	Acot5	-0.165477	Mvp	2.09232	Fcgr2b	1.90842
Gas2l2	Gabarap	Aloxe3	Doc2b	2810408A11Rik	Kcnj12		Zbtb7b	3.14123	9330161L09Rik	-0.862263	Ccdc13	2.20926	Cwc27	4.35318	Gm11992	0.784617	Cyyr1	2.86005
Taf15	Phf23	Alox8	Liat1	Gps2	Usp22		Slc7a2	5.67515	Tbccd1	3.10029	Sulf1	5.09144	Irx5	0.581262	Ifih1	4.00008	Enox1	0.138102
Heatr6	Dvl2	Gucy2e	Vps53	Eif5a	Rnf112		Tsc22d3	5.58996	Paox	0.51014	Tbx3	1.45352	2410131K14Rik	4.93771	Klf15	4.28647	Gm1078	-0.471164
Synrg	Dlg4	Cntrob	Tlcd3a	Ybx2	Mapk7		Gm10094	2.21327	Cox17	3.6125	Plekhf1	0.420097	Vegfa	6.08733	Dmpk	3.88069	Ccdc176	3.33678
Dusp14	Asgr1	Kcnab3	Gemin4	Ctdnep1	B9d1		Pabpc5	2.13687	Tpm3-rs7	1.09718	Spag17	1.39562	0610010K14Rik	-0.060693	Fermt3	1.75157	Paqr5	2.86005
Tada2a	Slc16a11	Chd3	Mrm3	Gabarap	Epn2		Rhoc	2.19454	Pdia6	6.28149	Mfsd10	1.93216	Gm13152	1.66693	Acrbp	1.98743	Dcdc2a	4.35952
Aatf	Slc16a13	Cyb5d1	Timm22	Phf23	Fam83g		Id1	2.54426	Gm12216	0.145787	Timmdc1	3.739	Dgkk	1.11627	Hba-a2	1.16731	Fzd7	4.12107
Mrm1	0610010K14Rik	Naa38	Abr	Dvl2	Prpsap2		Gm101	-0.104575	Grk6	2.61177	Il10rb	2.12268	Dhrs11	1.69713	Emilin2	1.78325	Cchcr1	1.03432
Ggnbp2	Rnasek	Tmem88	Cpd	Acadvl	Ulk2		Irs2	4.89483	Emp3	-0.862263	9330161L09Rik	-0.140795	Harbi1	2.8625	A4galt	1.06792	BC002059	3.36359
Znhit3	Pelp1	Kdm6b	Efcab5	Dlg4	Akap10		Disp1	1.78299	Rsph3b	0.662767	Tbccd1	2.53845	Htr1f	2.01742	Zfp747	2.63412	Nes	3.71546
Appbp2	Psmb6	Efnb3	Coro6	Asgr1	Specc1		Mfsd2a	3.32461	Cidea	1.80333	Cox17	3.31585	Tceanc2	4.53972	Tpcn1	1.75157	Ms4a6c	-0.134605
Ppm1d	Pld2	Wrap53	Taok1	Slc16a13	Adora2b		Sox1	4.25604	Fam167a	2.09925	Tpm3-rs7	0.988787	Zfp948	5.39229	Sgms2	4.37749	Rhog	4.08929
Rps6kb1	4930544D05Rik	Trp53	Nufip2	0610010K14Rik	Ttc19		Mfsd12	3.48729	Emx2	4.09411	Pdia6	6.30031	Oaz2	1.86615	Ap5z1	3.62502	Ptger1	0.367364
Vmp1	Gp1ba	Atp1b2	Myo18a	Rnasek	Ncor1		Chka	6.21637	Tjap1	2.09925	Gm12216	0.988787	Nudt22	1.89249	Egr3	4.06596	Fam60a	2.86005
Dhx40	Slc25a11	Sat2	Phf12	Pelp1	Cenpv		Tatdn1	-0.413692	Fam50a	3.67666	Grk6	3.22734	Gm7729	-0.682797	Mafg	5.5016	Proca1	0.469638
Ypel2	Rnf167	Fxr2	Dhrs13	Psmb6	Ubb		Dcp1a	3.45619	Daxx	3.20345	Emp3	0.095781	Ankfn1	0.873423	Lyar	1.84459	Klf10	5.13042
Smg8	Pfn1	Sox15	Flot2	Pld2	Trpv2		Llph	3.47958	Prkcq	3.94577	Rsph3b	1.58887	6430503K07Rik	-1.24657	Gm16314	1.01554	Fam160a2	2.14318
Trim37	Spag7	Senp3	Eral1	Mink1	Mmgt2		Krcc1	4.07851	Irf2bp2	6.42582	Cidea	1.2065	Pycard	0.514994	Gmppb	3.16574	Wdr31	3.33678
Ppm1e	Camta2	Tnfsf13	Traf4	4930544D05Rik	Cox10		Gm5506	1.73196	Rpl23	2.29883	Fam167a	1.02743	Gm3248	1.02397	Krt18	3.39832	Itfg3	4.31213
Mtmr4	Inca1	Polr2a	Rab34	Gp1ba	Elac2		Iqce	5.36145	Kdelc2	3.22813	Emx2	4.10694	Gm4491	0.445535	Tnfaip2	1.34763	G430095P16Rik	-1.19404
Hsf5	Zfp3	Zbtb4	Proca1	Slc25a11	Arhgap44		Zfp444	3.25403	Pafah1b3	-0.342854	Tjap1	2.93383	Prorsd1	0.705311	Mpdu1	3.55334	Irgm2	2.47368
Supt4a	Rabep1	Chrnb1	Supt6	Rnf167	Map2k4		Crcp	2.68505	Hist1h2bc	3.79701	Fam50a	3.61761	Syce2	-0.535069	Gm4924	1.5079	Hrh2	1.33456
Tspoap1	Nup88	Fgf11	Sdf2	Pfn1	Zkscan6		Kif23	1.12811	Slc46a1	1.73609	Daxx	3.26825	Creb3l2	3.3733	Antxr2	1.95997	Pak4	2.8411
Dynll2	Dhx33	Spem1	Aldoc	Spag7	Dnah9		Hes1	2.37166	Zc3h3	4.21014	Prkcq	3.70364	Hirip3	3.79935	Dmrt3	-0.276538	Mex3a	2.42359
Cuedc1	Derl2	2810408A11Rik	Pigs	Camta2	Shisa6		Pin1	4.40598	Utp14a	4.72548	Irf2bp2	6.13982	Gm21967	3.54916	Dnajb11	5.28635	Myl4	0.469638
Mrps23	6330403K07Rik	Neurl4	Unc119	Kif1c	Gas7		Ears2	2.63037	Aldh2	5.18855	Rpl23	3.61761	Rbm47	3.85398	Tceal5	4.20109	Ccdc134	-0.134605
Msi2	Wscd1	Gps2	Slc46a1	Zfp3	Rcvrn		Wbp1l	4.79892	Mtfmt	3.32283	Kdelc2	3.14186	Tpx2	1.28483	Ccdc51	1.21455	Irf5	1.71375
Akap1	Pimreg	Eif5a	Sarm1	Rabep1	Stx8		Ovgp1	2.11712	Aard	-0.862263	Pafah1b3	1.68869	Agmo	3.90015	Ythdc1	5.9931	Acad12	0.739043
Coil	Pitpnm3	Ybx2	Tmem199	Nup88	Ntn1		Mterf	2.32077	D19Ertd737e	-0.496109	Hist1h2bc	4.05645	Zfp960	2.84911	Erich1	3.35681	Cald1	4.76351
Dgke	Txndc17	Ctdnep1	Tnfaip1	Rpain	Myh10		Sh3bp1	3.32461	Gm20695	-0.204327	Slc46a1	1.73612	Gpr182	0.925372	Olfr46	-0.036407	Bank1	1.03432
Mmd	Tekt1	Gabarap	Ift20	Dhx33	Ndel1		Gm14393	2.84966	Nfkbie	0.926736	Zc3h3	3.71552	Mtf1	5.8425	Prr7	2.30367	Rab11fip1	3.4029
Hlf	Mybbp1a	Phf23	Nlk	Derl2	Odf4		Traip	4.65911	Des	-0.204327	Utp14a	4.61496	Slfn5	3.86732	Mroh6	-0.564779	Bola3	3.33678
Cox11	Spns2	Dvl2	Ccnq	6330403K07Rik	Arhgef15		Bdh2	1.04694	Ubxn11	1.51326	Aldh2	5.36476	Klhl6	1.11627	Zfp771	2.30367	Wdr52	5.78447
Car10	Ube2g1	Acadvl	Lyrm9	Wscd1	Ctc1		Spsb1	4.11878	Ccdc138	2.93024	Mtfmt	3.66126	Itga2b	0.2957	Lzts2	3.76646	Catsper2	2.01374
Utp18	Ankfy1	Dlg4	Lgals9	Pimreg	Borcs6		Fhit	0.72036	1110034G24Rik	1.92907	Aard	0.732284	Tekt1	1.91835	Cox20	3.77436	Slc29a1	2.8411
Nme1	Zzef1	Asgr1	Wsb1	Pitpnm3	Vamp2		Mt2	5.60421	Gm14420	4.31754	Gm20695	-1.24419	Irf9	4.05974	Nod2	1.06792	Cyp11a1	2.07991
Spag9	Camkk1	Slc16a11	Nf1	4933427D14Rik	Per1		Fam20a	3.54015	Folh1	3.70331	Nfkbie	0.988787	Star	2.01742	BC007180	3.55334	Dsg2	3.60743
Ankrd40cl	Ncbp3	Slc16a13	Omg	Mybbp1a	Hes7		Slc31a2	2.78855	Cep110	5.17274	Des	1.30415	Parvg	2.87576	Capsl	2.44901	Gm21807	-0.674351
Luc7l3	Itgae	0610010K14Rik	Utp6	Spns2	Aloxe3		Ddit3	2.68505	P4ha1	5.80776	Ubxn11	1.95238	Vps39	3.11824	Swap70	3.58963	Zfp51	3.06998
Ankrd40	Olfr412	Rnasek	Crlf3	Ube2g1	Alox12b		Ttll3	3.96156	Fancf	0.80078	Ccdc138	2.53845	Taf1d	1.02397	Cd59a	2.09232	Fdx1	3.10218
Abcc3	Rap1gap2	Pelp1	Rhot1	Cyb5d2	Trappc1		Slc16a12	2.61637	Zbtb7b	2.75451	1110034G24Rik	1.86973	Ptpn6	1.53939	Gm10263	-1.14627	Mybl1	2.7424
Cacna1g	Ccdc92b	Pld2	Rhbdl3	Zzef1	Kcnab3		Apold1	3.01885	Slc7a2	5.69056	Gm14420	3.80721	Ccdc79	0.873423	Icam2	0.169401	Cd320	3.78654
Spata20	Cluh	Mink1	5730455P16Rik	Atp2a3	Chd3		Csf2rb2	0.821448	Tsc22d3	5.90662	Folh1	3.51935	Hist1h2ak	0.372562	Fcgr2b	1.5079	3110007F17Rik	1.22185
Epn3	Pafah1b1	4930544D05Rik	Zfp207	Camkk1	Cyb5d1		Alpk1	3.59115	Gm10094	2.17737	Cep110	5.00936	Ifit2	3.66064	Cyyr1	2.76681	Igf2	7.12079
Chad	Mnt	Slc25a11	Psmd11	Ncbp3	Naa38		Disc1	1.62416	Pabpc5	2.34469	P4ha1	6.02873	4930444P10Rik	1.28483	Enox1	1.11847	H2-M3	0.65471
Lrrc59	Sgsm2	Pfn1	Cdk5r1	Emc6	Tmem88		Zfp882	4.11381	Rhoc	1.92907	Fancf	0.988787	Gm13139	3.11824	Gm1078	0.262249	Asb16	1.71375
Mrpl27	Tsr1	Spag7	Tmem98	Olfr412	Efnb3		Ccs	2.96463	Id1	3.01777	Zbtb7b	3.12414	Barx2	-0.682797	Ccdc176	3.73441	Gpr156	0.65471
Xylt2	Smg6	Camta2	Spaca3	Rap1gap2	Wrap53		Col9a3	4.46576	Irs2	4.94234	Slc7a2	5.61997	Stra6	3.41932	Paqr5	2.88831	Cep41	3.20954
Ppp1r9b	Srr	Inca1	Asic2	Ccdc92b	Trp53		1700109H08Rik	2.7506	Disp1	2.07225	Tsc22d3	5.34769	Aoc2	2.41273	Dcdc2a	4.19522	Fzd4	2.49808
Samd14	Hic1	Kif1c	Zfp830	Cluh	Atp1b2		Zfp330	4.0836	Mfsd2a	3.81341	Gm10094	2.15794	Mt1	5.66289	Fzd7	3.52552	6720489N17Rik	0.257282
Pdk2	Rtn4rl1	Zfp3	Lig3	Pafah1b1	Sat2		Srrm3	4.98475	Sox1	4.30599	Pabpc5	2.60384	Fam203a	2.61608	Cchcr1	0.845903	P2rx3	0.89422
Itga3	Rpa1	Rpain	Nle1	Mnt	Fxr2		Gas2l1	4.55654	Mfsd12	3.54535	Rhoc	2.15794	Zfp689	1.28483	BC002059	2.76681	Prkcsh	5.30311
Kat7	Serpinf2	Dhx33	Slfn5	Sgsm2	Sox15		Ppap2c	0.66703	Chka	6.42848	Id1	2.56496	Cnnm3	1.50566	Krt7	1.58182	Clrn1	1.4391
Slc35b1	Wdr81	Derl2	Ap2b1	Smg6	Senp3		Ccdc19	1.00457	Tatdn1	-0.342854	Gm101	0.477048	Bfsp2	1.43574	Nes	3.98654	3110082I17Rik	1.71375
Nxph3	Prpf8	6330403K07Rik	Rasl10b	Srr	Polr2a		A430033K04Rik	4.38136	Dcp1a	3.36795	Irs2	4.77681	Notum	0.2957	Ms4a6c	-0.036407	Wdr66	3.70501
Ngfr	Slc43a2	Wscd1	Gas2l2	Hic1	Zbtb4		Slc15a4	4.02122	Llph	3.13985	Disp1	2.06812	Leo1	4.11111	Rhog	3.10436	Slc4a2	5.77201
Zfp652	Pitpna	Pimreg	Taf15	Rtn4rl1	Fgf11		St7l	2.93109	Krcc1	3.96792	Mfsd2a	3.15937	Klhl33	0.036992	Fam60a	3.55334	Cry1	4.43098
Phospho1	Crk	Pitpnm3	Heatr9	Rpa1	Spem1		Atn1	5.88675	Gm5506	1.51326	Sox1	4.14698	Prg4	1.60457	Proca1	1.21455	Adamtsl2	1.90842
Snf8	Ywhae	Mybbp1a	Heatr6	Serpinf2	Nlgn2		Tnfrsf11b	0.225584	Iqce	5.24102	Mfsd12	3.51256	3300002I08Rik	3.14039	Klf10	5.34059	Gm10093	0.739043
Snx11	Rph3al	Spns2	Synrg	Wdr81	Plscr3		Tgif1	0.366069	Zfp444	2.86878	Chka	6.13651	Slc4a5	4.32444	Fam160a2	3.07906	Lhfpl4	5.99847
Nfe2l1	1700016K19Rik	Ankfy1	Dusp14	Prpf8	Tmem95		Stbd1	0.494079	Crcp	2.51481	Tatdn1	-0.776528	Cyp27b1	0.581262	Wdr31	2.98684	Pcp4	2.59178
Cdk5rap3	Rflnb	Cyb5d2	Tada2a	Pitpna	Gps2		Chpf	4.36889	Kif23	1.34294	Dcp1a	3.58559	Scgn	0.214512	Itfg3	3.38805	Arhgef16	0.257282
Pnpo	Vps53	Zzef1	Acaca	Crk	Eif5a		Anks1	4.5675	Hes1	2.34469	Llph	3.24384	Otx2	3.99436	Irgm2	2.73476	Pm20d2	3.2388
Sp2	Mrm3	Atp2a3	Aatf	Ywhae	Ybx2		Akap1	0.431493	Pin1	4.21633	Krcc1	4.05177	Ak2	2.70793	Hrh2	1.90344	Zbtb26	4.98258
Mrpl10	Timm22	Camkk1	Ggnbp2	1700016K19Rik	Slc2a4		Scube3	2.03531	Ears2	2.25147	Gm5506	1.58887	Ccdc112	3.7059	Pak4	2.44901	Myo1f	1.33456
Osbpl7	Abr	Itgae	Znhit3	Rflnb	Elp5		4931440F15Rik	1.94857	Wbp1l	5.00437	Iqce	5.41845	Vsig10l	1.66693	Mex3a	2.90281	Pinx1	2.1119
Tbkbp1	Gosr1	Olfr412	Ppm1d	Vps53	Ctdnep1		Tarbp2	2.28582	Ovgp1	2.6488	Zfp444	3.51256	P2rx5	1.53939	Myl4	0.431738	Vwa3a	3.66246
Kpnb1	Cpd	Rap1gap2	Ints2	Mrm3	Gabarap		Fgd3	3.24496	Mterf	2.41086	Crcp	2.90299	Slc25a47	1.57235	Irf5	1.26029	Pde6h	1.2793
Npepps	Blmh	Ccdc92b	Rnft1	Nxn	Phf23		Racgap1	2.28582	Sh3bp1	3.40088	Kif23	0.908249	Cyp27a1	2.53481	Acad12	1.5079	2310042D19Rik	0.469638
Mrpl45	Efcab5	Cluh	Rps6kb1	Abr	Dvl2		Cbx2	1.24191	Gm14393	2.61177	Hes1	2.24249	Fbxl19	4.09419	Cald1	4.64221	Chadl	1.94439
Socs7	Ssh2	Pafah1b1	Vmp1	Gosr1	Dlg4		Zbtb2	4.08868	Traip	4.9864	Pin1	4.54009	Chrnb1	-0.535069	Bank1	0.72061	Pnpt1	2.44885
Arhgap23	Coro6	Mnt	Dhx40	Cpd	Asgr1		Abcb4	3.13142	Spsb1	4.47016	Ears2	2.99361	Gm10530	2.92762	Rab11fip1	2.94543	Rab4b	0.008183
Epop	Ankrd13b	Sgsm2	Smg8	Efcab5	Slc16a11		Morn2	-1.87643	Fhit	0.985817	Wbp1l	4.74528	Pank2	1.83932	Bola3	3.45842	4833427G06Rik	1.03432
Cisd3	Git1	Smg6	Trim37	Ssh2	Slc16a13		Msto1	2.88513	Mt2	5.19482	Ovgp1	2.17525	Lrrc6	2.8356	Wdr52	5.55534	Polr3d	3.99812
Psmb3	Taok1	Srr	Ppm1e	Coro6	Rnasek		Gimap6	1.87992	Fam20a	2.82091	Mterf	1.992	Slc2a12	4.57267	Catsper2	1.81425	Alg12	3.08617
Pip4k2b	Nufip2	Hic1	Mtmr4	Ankrd13b	Pelp1		Col13a1	0.821448	Slc31a2	2.93024	Sh3bp1	3.28429	Psma8	-0.278471	Slc29a1	2.46862	Ccdc55	3.90079
Cwc25	Myo18a	Rtn4rl1	Hsf5	Taok1	Arrb2		Fxyd5	2.5294	Ddit3	2.49461	Gm14393	2.95403	Gm9767	-0.847396	Cyp11a1	1.78325	9030624G23Rik	-1.54663
Lasp1	Pipox	Rpa1	Rnf43	Nufip2	Psmb6		Masp1	2.48386	Ttll3	3.93082	Traip	4.18166	Kcnq1	-0.165477	Dsg2	3.77436	Rgs6	3.06998
Plxdc1	Sez6	Serpinf1	Tspoap1	Myo18a	Mink1		Anxa2	2.99741	Slc16a12	3.1136	Bdh2	1.27233	Mpv17l2	1.72671	Zfp51	3.27004	Nav1	0.56514
Cacnb1	Phf12	Serpinf2	Mpo	Pipox	4930544D05Rik		Gm9881	0.431493	Apold1	2.6488	Spsb1	3.70364	Zbtb16	7.37265	Fdx1	1.34763	Crocc	5.37406
Rpl19	Dhrs13	Wdr81	Dynll2	Sez6	Slc25a11		Smim3	3.06081	Csf2rb2	0.926736	Fhit	0.584619	Ybey	2.8356	Mybl1	2.36776	Ccdc9	4.17505
Stac2	Flot2	Pitpna	Cuedc1	Phf12	Pfn1		Dnase1l2	1.97075	Alpk1	3.64035	Mt2	5.88225	Rgs11	4.68241	Cd320	4.23012	Plp1	8.27236
Fbxl20	Traf4	Myo1c	Mrps23	Dhrs13	Spag7		Klf11	1.44565	Disc1	2.1518	Fam20a	3.88292	Utp14b	6.64046	3110007F17Rik	2.34671	Tll1	2.56892
Med1	Tlcd1	Crk	Msi2	Flot2	Camta2		Ldhd	2.32077	Zfp882	4.19144	Slc31a2	2.70266	Heatr1	4.83958	Igf2	6.35246	Kif9	3.8916
Cdk12	Rpl23a	Ywhae	Akap1	Traf4	Kif1c		Casp12	0.611652	Ccs	3.00354	Ddit3	2.69067	Ddx60	2.04116	Gpr156	1.01554	3110052M02Rik	3.65162
Neurod2	Rab34	1700016K19Rik	Coil	Tlcd1	Zfp3		5730559C18Rik	0.297535	Col9a3	4.74271	Ttll3	3.92958	Pip5kl1	1.81198	Cep41	2.81358	Enpep	1.87153
Ppp1r1b	Proca1	Vps53	Dgke	Rpl23a	Rabep1		Pf4	-1.59009	1700109H08Rik	3.01777	Slc16a12	2.29094	Shroom1	2.19722	Fzd4	3.18957	Cmss1	1.83367
Stard3	Supt6	Dbil5	Nog	Rab34	Nup88		Pdia4	5.67852	Zfp330	3.89274	Apold1	2.92362	Incenp	3.3733	6720489N17Rik	0.349481	BC067074	4.26313
Tcap	Sdf2	Mrm3	Hlf	Proca1	Rpain		Mitf	4.40191	Srrm3	4.84598	Csf2rb2	0.822948	Suv420h2	3.72067	P2rx3	0.784617	Cwc15	4.95199
Pnmt	2610507B11Rik	Nxn	Cox11	Supt6	C1qbp		Slc29a4	4.04231	Gas2l1	4.14684	Alpk1	3.21901	Abca4	4.39523	Prkcsh	5.3591	Ifitm7	0.65471
Mien1	Aldoc	Timm22	Car10	Sdf2	Dhx33		Zfp551	2.67157	Ppap2c	0.245858	Disc1	1.2065	Prelid2	-0.401072	Clrn1	1.11847	Rmdn2	3.30946
Psmd3	Unc119	Abr	Mbtd1	Aldoc	Mis12		Derl2	5.10493	Ccdc19	1.59142	Zfp882	3.99928	AA986860	1.72671	3110082I17Rik	1.81425	Rbm41	4.89339
Csf3	Slc46a1	Gosr1	Nme2	Pigs	Derl2		Bche	3.55491	A430033K04Rik	4.59874	Ccs	2.91335	Samd1	3.87395	Wdr66	2.94543	Atp7a	5.28919
Thra	Sarm1	Cpd	Nme1	Unc119	6330403K07Rik		Upf3a	3.55491	Slc15a4	4.08738	Col9a3	4.08879	Ppp1r3f	3.57379	Slc4a2	5.24429	Pygl	2.23317
Nr1d1	Tmem199	Efcab5	Spag9	Slc46a1	Wscd1		Prkcd	4.72583	St7l	2.9452	1700109H08Rik	2.70266	BC100451	1.57235	Cry1	3.97287	Mettl7a3	-1.19404
Msl1	Tnfaip1	Ssh2	Wfikkn2	Sarm1	Pimreg		Gm6563	3.75983	Atn1	5.7599	Hcrtr1	0.360806	Lsm2	1.81198	Adamtsl2	1.81425	Col8a2	4.86082
Rapgefl1	Ift20	Coro6	Ankrd40cl	Vtn	Pitpnm3		Slc35a4	4.04754	Tnfrsf11b	0.038255	Zfp330	4.12932	E130012A19Rik	3.72067	Gm10093	1.16731	Lrguk	2.61428
Cdc6	Nlk	Ankrd13b	Luc7l3	Tmem199	4933427D14Rik		Fam101b	3.53272	Tgif1	0.80078	Srrm3	5.05917	Mapk15	0.128481	Lhfpl4	5.82255	Ppp1r3d	2.56892
Rara	Lgals9	Taok1	Ankrd40	Poldip2	Med31		Aar2	4.43019	Stbd1	0.145787	Gas2l1	4.77397	Zfp579	3.68345	Pcp4	1.21455	Slc37a1	2.42359
Gjd3	Ksr1	Nufip2	Abcc3	Tnfaip1	Slc13a5		Zfhx2	6.25303	Chpf	4.20394	Ppap2c	0.095781	mt-Nd4l	4.09985	En2	0.509557	Tec	1.58295
Igfbp4	Wsb1	Myo18a	Cacna1g	Ift20	Tekt1		Hexim2	2.07679	Anks1	4.54081	Ccdc19	1.06507	Apoo-ps	1.66693	Ube2t	0.169401	Scml2	0.818717
Smarce1	Nf1	Pipox	Spata20	Nlk	Mybbp1a		Acacb	2.91974	Akap1	-0.077944	A430033K04Rik	4.46113	Ear2	-0.535069	Pm20d2	2.75087	Zbtb48	2.87876
Krt222	Omg	Phf12	Epn3	Ccnq	Spns2		Rpl10-ps3	-1.14645	Scube3	2.20249	Slc15a4	3.89342	Pappa	1.94377	Zbtb26	4.78205	Trim56	3.32318
Krt12	Rab11fip4	Dhrs13	Chad	Lgals9	Ube2g1		BC031181	-0.303129	4931440F15Rik	2.07225	St7l	2.69067	Cenpa	1.07086	Myo1f	2.11739	Hmgn5	3.78654
Hap1	Suz12	Flot2	Lrrc59	Ksr1	Ankfy1		Uxt	2.33794	Tarbp2	2.53473	Atn1	6.01918	Arhgap31	6.03213	Pinx1	2.90281	Lbp	4.78846
Jup	Tefm	Eral1	Eme1	Wsb1	Cyb5d2		Spef2	3.44038	Fgd3	2.853	Tnfrsf11b	0.778328	Lrrc2	1.43574	Vwa3a	2.85888	Sh3gl1	4.37278
Fkbp10	Rhot1	Traf4	Mrpl27	Nf1	Zzef1		Htatsf1	5.82266	Racgap1	2.12576	Tgif1	0.635538	Gm216	1.86615	Pde6h	1.42999	Mpp7	3.20954
Nt5c3b	Rhbdl3	Tlcd1	Xylt2	Omg	Atp2a3		Taf5	3.17027	Cbx2	1.09718	Stbd1	0.360806	Asl	4.19815	2310042D19Rik	0.431738	Ifrd2	1.7948
Acly	5730455P16Rik	Rab34	Ppp1r9b	Rab11fip4	Camkk1		Erh	-0.664027	Zbtb2	3.93832	Chpf	4.40354	Foxm1	0.705311	Chadl	2.21353	Sorbs3	4.68063
Cnp	Zfp207	Proca1	Samd14	Suz12	Ncbp3		Agfg1	3.51773	Abcb4	2.93024	Anks1	4.57312	Gpank1	2.46632	Pnpt1	2.30367	Eogt	3.41577
Dnajc7	Cdk5r1	Supt6	Pdk2	Tefm	Emc6		Ddx27	4.26504	Morn2	-1.35416	Akap1	-0.057551	Serf1	2.37587	Rab4b	0.169401	Chga	4.90256
Kat2a	Tmem98	Aldoc	Itga3	Rnf135	Tax1bp3		Caskin2	4.06311	Msto1	3.01777	Scube3	1.8483	Tor3a	3.04968	4833427G06Rik	0.583392	Lrriq1	3.93694
Hspb9	Spaca3	Pigs	Kat7	Rhot1	Olfr412		Mpst	2.37166	Gimap6	1.7701	4931440F15Rik	2.03056	Cyp2r1	1.60457	Polr3d	3.95906	Zscan29	3.93694
Rab5c	Asic2	Unc119	Slc35b1	Rhbdl3	Rap1gap2		Uhrf1bp1	4.50048	Fxyd5	2.45334	Tarbp2	2.25882	Ccdc25	5.16538	Alg12	3.32488	Myom3	0.469638
Stat5b	Zfp830	Slc46a1	Nxph3	5730455P16Rik	Ccdc92b		2010109A12Rik	-1.14645	Masp1	3.00354	Fgd3	2.98381	1110004E09Rik	3.72067	Ccdc55	3.94513	Golga4	6.95878
Stat5a	Rffl	Sarm1	Phb1	Zfp207	Cluh		Polr2k	3.28975	Anxa2	2.91512	Racgap1	2.51144	Mvp	2.82196	9030624G23Rik	-0.276538	Gpr98	5.2538
Stat3	Pex12	Poldip2	Zfp652	Psmd11	Pafah1b1		Mfap1a	4.71602	Gm9881	0.865132	Cbx2	0.866229	Gm11992	1.2445	Rgs6	2.46862	Mrpl19	4.77354
Cavin1	Ap2b1	Tnfaip1	Phospho1	Cdk5r1	Mnt		Prr5	1.41363	Smim3	3.29973	Zbtb2	4.35499	Ddx43	0.372562	Nav1	0.845903	Ttyh2	5.59381
Atp6v0a1	Rasl10b	Ift20	Snf8	Tmem98	Sgsm2		Jhdm1d	8.01111	Dnase1l2	2.34469	Abcb4	3.06035	Ifih1	3.49002	Crocc	5.11954	Ppard	3.81596
Naglu	Gas2l2	Nlk	Ube2z	Spaca3	Smg6		Mphosph10	4.36889	Klf11	1.20056	Morn2	-1.66935	Klf15	4.5604	Gprin2	-0.925363	Mb21d1	0.965968
Coasy	Taf15	Ccnq	Atp5mc1	Asic2	Srr		Xkr8	2.19454	Ldhd	1.98806	Msto1	2.60384	Dmpk	4.05974	Ccdc9	4.53465	Neu4	3.32318
Mlx	Heatr9	Lgals9	Ttll6	Zfp830	Hic1		Ptges	1.31307	Casp12	1.20056	Gimap6	1.68869	Fermt3	1.50566	Plp1	7.96008	Tc2n	3.03705
Tubg1	Heatr6	Ksr1	Snx11	Lig3	Ovca2		Cdca7	1.38088	Pf4	-1.68178	Col13a1	1.23979	Acrbp	2.8889	Tll1	3.10436	Ticam1	2.63644
Plekhh3	Synrg	Nf1	Nfe2l1	Rffl	Rtn4rl1		Chac1	1.20496	Pdia4	5.74288	Fxyd5	2.85007	Hba-a2	1.63609	Kif9	2.98684	B9d2	1.48866
Cntnap1	Dusp14	Omg	Pnpo	Ap2b1	Rpa1		Plscr2	1.5959	Mitf	4.57969	Masp1	2.48391	Emilin2	0.705311	3110052M02Rik	3.39832	Snx9	4.31213
Ezh1	Tada2a	Rab11fip4	Sp2	Rasl10b	Serpinf1		Clic5	3.32461	Slc29a4	4.30018	Anxa2	3.27629	A4galt	1.2445	Enpep	1.84459	Nefm	6.30897
Wnk4	Aatf	Utp6	Scrn2	Gas2l2	Prpf8		Ttll12	2.97564	Zfp551	2.82091	Smim3	2.92362	Zfp747	2.25926	Cmss1	2.16626	Iba57	2.04721
Coa3	Ggnbp2	Suz12	Mrpl10	Taf15	Rilp		Acad10	1.65187	Derl2	5.06385	Dnase1l2	2.10472	Tpcn1	2.7373	BC067074	4.14123	Mki67	1.87153
Becn1	Znhit3	Crlf3	Osbpl7	Heatr9	Pitpna		Acot2	2.71163	Bche	3.50553	Klf11	2.04946	Sgms2	4.33408	Cwc15	4.52531	Nt5dc1	3.20954
Aoc2	Usp32	Tefm	Tbkbp1	Synrg	Inpp5k		Gm5087	0.611652	Upf3a	3.47492	Ldhd	2.01141	Ap5z1	3.69845	Ifitm7	1.16731	Card6	2.8411
Aarsd1	Appbp2	Adap2	Kpnb1	Dusp14	Myo1c		Tmem132c	1.78299	Prkcd	4.58447	Casp12	0.635538	Egr3	4.53972	Rmdn2	3.2475	Mrps18a	3.82564
Ptges3l	Ppm1d	Rnf135	Mrpl45	Tada2a	Crk		Ppfibp1	5.21586	Gm6563	3.5841	5730559C18Rik	0.635538	Mafg	5.69692	Rbm41	5.17732	Arrdc2	3.55023
Vat1	Med13	Rhot1	Socs7	Aatf	Ywhae		1700007B14Rik	-0.104575	Slc35a4	4.0041	Pf4	-0.916221	Lyar	2.84911	Atp7a	5.18326	Tbata	2.63644
Arl4d	Rnft1	5730455P16Rik	Arhgap23	Ggnbp2	Doc2b		Gm14410	4.03707	Fam101b	3.24032	Pdia4	5.58153	Gm16314	1.50566	Pygl	2.71847	Insl5	0.367364
Dhx8	Rps6kb1	Zfp207	Srcin1	Znhit3	1700016K19Rik		Plekhn1	2.0971	Aar2	4.29435	Mitf	4.26082	Gmppb	2.60019	Mettl7a3	-1.14627	Gng5	4.28433
Etv4	Vmp1	Psmd11	Epop	Car4	Rflnb		Il4ra	1.85629	Zfhx2	6.17286	Slc29a4	3.89342	Krt18	2.78025	Col8a2	3.15367	Trp73	2.31787
Sost	Cltc	Cdk5r1	Mllt6	Usp32	Vps53		Rnaseh2a	2.68505	Hexim2	1.62897	Zfp551	3.051	Tnfaip2	1.07086	Lrguk	2.28166	Tbc1d4	3.90079
Dusp3	Dhx40	Spaca3	Cisd3	Appbp2	Mrm3		Zfp335	4.79892	Acacb	3.16563	Derl2	5.17557	Mpdu1	4.00043	Ppp1r3d	3.04025	P2ry2	0.469638
Mpp3	Ypel2	Asic2	Psmb3	Ppm1d	Timm22		Acot1	2.19454	Rpl10-ps3	-0.862263	Bche	3.51256	Gm4924	0.581262	Slc37a1	2.32535	Aldh1l1	5.37406
Cd300lg	Smg8	Tmem132e	Pip4k2b	Med13	Abr		Upf3b	4.75168	BC031181	-1.08735	Upf3a	3.70364	Antxr2	3.08437	Tec	1.68605	Slc2a1	5.95725
Mpp2	Ska2	Zfp830	Cwc25	Rps6kb1	Gosr1		Soga1	5.58996	Uxt	2.27534	Prkcd	4.80211	Dmrt3	0.2957	Scml2	1.30462	Uqcr11	4.55249
Tmem101	Trim37	Rffl	Lasp1	Vmp1	Cpd		Scd1	7.60702	Spef2	3.96058	Gm6563	3.84015	Dnajb11	5.62805	Zbtb48	2.87367	Atp11a	3.41577
Lsm12	Ppm1e	Nle1	Fbxo47	Cltc	Slc6a4		Hdac4	5.26828	Htatsf1	5.68612	Slc35a4	4.24041	Tceal5	5.11594	Trim56	3.58064	Cul4b	4.01513
G6pc3	Tex14	Slfn5	Plxdc1	Dhx40	Efcab5		N4bp2	5.2593	Taf5	3.38998	Fam101b	3.63022	Ccdc51	1.83932	Hmgn5	3.38805	Akr1b10	3.92799
Tmub2	Sept4	Ap2b1	Arl5c	Ypel2	Ssh2		Apip	2.98657	Erh	0.339436	Aar2	4.60541	Ythdc1	6.14735	Lbp	3.97287	Hrsp12	4.54665
Atxn7l3	Supt4a	Rasl10b	Rpl19	Smg8	Coro6		Zfp786	1.70576	Agfg1	3.54535	Zfhx2	6.25218	Erich1	2.97769	Sh3gl1	4.51591	Myo5b	5.26806
Ubtf	Tspoap1	Gas2l2	Stac2	Trim37	Ankrd13b		Ky	1.67907	Ddx27	4.21014	Hexim2	2.06812	Olfr46	-0.847396	Mpp7	3.00038	Tcirg1	3.05361
Slc25a39	Mpo	Taf15	Fbxl20	Ppm1e	Git1		Carns1	1.92605	Caskin2	3.4852	Acacb	3.1062	Eln	2.50097	Ifrd2	1.58182	Cebpa	1.90842
Grn	Dynll2	Heatr9	Med1	Sept4	Trp53i13		Wfdc2	-0.664027	Mpst	2.20249	Rpl10-ps3	-1.0709	Prr7	2.06451	Sorbs3	3.44858	Gltscr1	4.1367
Fam171a2	Srsf1	Heatr6	Cdk12	Supt4a	Abhd15		Dnajc3	6.4114	Uhrf1bp1	4.34035	BC031181	0.531836	Zfp771	2.61608	Eogt	3.79782	Zpbp	2.07991
Itga2b	Vezf1	Synrg	Neurod2	Tspoap1	Taok1		Timeless	0.915915	Polr2k	2.72013	Uxt	2.15794	Lzts2	3.8132	Chga	4.38267	Ltv1	3.97222
Gpatch8	Cuedc1	Dusp14	Ppp1r1b	Mpo	Nufip2		Sncg	0.611652	Axdnd1	0.51014	Spef2	3.18523	Cox20	4.00647	Clec4a1	-0.151482	Dnajc21	5.06249
Fzd2	Mrps23	Tada2a	Tcap	Dynll2	Myo18a		Slc2a10	0.611652	Mfap1a	4.74271	Htatsf1	5.8162	BC007180	4.34843	Lrriq1	4.14123	Spata13	5.03773
Ccdc43	Msi2	Aatf	Mien1	Srsf1	Pipox		Sart1	5.07453	Prr5	1.43061	Taf5	3.07887	Capsl	2.19722	Zscan29	3.79004	Klhl36	0.965968
Higd1b	Akap1	Mrm1	Psmd3	Vezf1	Sez6		Ptp4a1	6.02696	Jhdm1d	8.26639	Erh	-1.24419	Swap70	3.68345	Golga4	6.77702	Pum2	3.08617
Eftud2	Coil	Znhit3	Csf3	Cuedc1	Phf12		Phyh	6.15354	Mphosph10	4.49579	Agfg1	3.52611	Cd59a	2.61608	Gpr98	4.70971	Zbbx	3.47844
Fam187a	Dgke	Usp32	Nr1d1	Mrps23	Dhrs13		Thap2	-0.200439	Xkr8	1.95887	Ddx27	4.12041	Gm10263	-0.401072	Mrpl19	5.10395	Myh14	4.86552
Gfap	Nog	Appbp2	Msl1	Akap1	Flot2		mt-Nd4	11.0624	Ptges	1.43061	Caskin2	4.14698	Icam2	0.581262	Ttyh2	4.77813	Wbscr22	3.32318
C1ql1	Mmd	Ppm1d	Casc3	Coil	Fam222b		Oxa1l	4.09374	Cdca7	1.38744	Mpst	2.65409	Fcgr2b	2.29918	Ppard	3.30319	Mamdc2	1.7948
Nmt1	Hlf	Med13	Rapgefl1	Nog	Traf4		4930447C04Rik	3.92795	Chac1	1.2496	Uhrf1bp1	4.50629	Cyyr1	3.14039	Mb21d1	1.68605	Dlec1	2.93348
Plcd3	Cox11	Rps6kb1	Wipf2	Hlf	Rpl23a		Atf6b	4.93204	Plscr2	1.55287	2010109A12Rik	-0.776528	Enox1	1.11627	Neu4	2.2593	Maz	5.48811
Hexim1	Car10	Vmp1	Cdc6	Cox11	Rab34		Parp9	2.78855	Clic5	3.92328	Polr2k	3.64271	Gm1078	0.445535	Tc2n	2.46862	Il18bp	3.22424
Hexim2	Utp18	Cltc	Rara	Car10	Proca1		AK010878	3.2174	Ttll12	2.57377	Mfap1a	4.70711	Ccdc176	4.39983	Ticam1	1.95997	Kcng2	3.53851
Fmnl1	Mbtd1	Ypel2	Gjd3	Utp18	Sdf2		Rdm1	1.00457	Acad10	2.12576	Prr5	1.36577	Paqr5	2.35707	B9d2	1.3894	Gpt	2.98619
Efcab15	Nme2	Smg8	Igfbp4	Mbtd1	2610507B11Rik		Tspan18	4.1434	Acot2	3.01777	Jhdm1d	7.79343	Dcdc2a	3.61391	Snx9	4.17744	Ocln	4.73299
Spata32	Nme1	Trim37	Smarce1	Nme2	Aldoc		Mavs	2.60223	Gm5087	0.80078	Mphosph10	4.21552	Fzd7	3.72801	Nefm	6.05605	Cad	4.01513
Arhgap27	Spag9	Ppm1e	Krt222	Nme1	Pigs		Chpt1	6.40021	Tmem132c	0.80078	Xkr8	2.06812	Cchcr1	1.39946	Iba57	2.52592	Tgm2	1.7948
Plekhm1	Tob1	Sept4	Krt10	Spag9	Unc119		Lypla1	5.21817	Ppfibp1	5.13082	Ptges	1.58887	BC002059	2.92762	Mki67	2.91716	Reep4	1.83367
Rprml	Luc7l3	Mtmr4	Krt12	Tob1	Sarm1		Arid5b	5.22741	1700007B14Rik	-0.496109	Cdca7	1.23979	Nes	3.78536	Nt5dc1	3.30319	Ppp1r3b	1.94439
Gosr2	Ankrd40	Hsf5	Krt9	Luc7l3	Poldip2		Dach2	1.0881	Gm14410	3.90809	Chac1	1.58887	Ms4a6c	-0.535069	Card6	2.42912	Hpgd	2.44885
Wnt3	Abcc3	Tspoap1	Hap1	Ankrd40	Tnfaip1		Tsen54	1.47698	Plekhn1	2.07225	Plscr2	1.53625	Rhog	3.12936	Mrps18a	3.73441	Carf	2.17381
Nsf	Cacna1g	Mpo	Jup	Abcc3	Ift20		Uvssa	1.04694	Il4ra	2.1518	Clic5	3.09715	Fam60a	2.84911	Arrdc2	3.8209	Wdr25	2.65826
Crhr1	Spata20	Dynll2	Fkbp10	Cacna1g	Nlk		Kcnj8	0.915915	Rnaseh2a	2.70263	Ttll12	2.97396	Proca1	0.2957	Tbata	3.11685	Zfp324	3.68389
Sppl2c	Lrrc59	Vezf1	Nt5c3b	Spata20	Lyrm9		Serpinb1b	1.24191	Zfp335	4.73842	Acad10	1.30415	Klf10	5.18149	Gng5	3.71811	Trim30d	1.67146
Mapt	Eme1	Cuedc1	Klhl10	Chad	Lgals9		Agtr2	0.149854	Acot1	2.07225	Acot2	2.36825	Fam160a2	1.89249	Trp73	1.46947	Rab38	-0.674351
Kansl1	Mrpl27	Mrps23	Acly	Lrrc59	Ksr1		Fam122a	2.38823	Upf3b	5.12754	Gm5087	0.584619	Wdr31	2.97769	Tbc1d4	4.97957	Aspdh	1.2793
Tlk2	Xylt2	Msi2	Cnp	Eme1	Wsb1		Dad1	4.50048	Soga1	5.62935	Gpr151	-0.423924	Itfg3	3.65296	Aldh1l1	4.86581	Slc16a10	2.70094
Mrc2	Col1a1	Akap1	Dnajc7	Mrpl27	Nf1		Pifo	1.0881	Scd1	7.72198	Tmem132c	2.15794	G430095P16Rik	-1.80033	Slc2a1	6.07217	4930518I15Rik	1.90842
Cyb561	Ppp1r9b	Coil	Kat2a	Xylt2	Omg		Zfp599	2.78855	Hdac4	5.23494	Ppfibp1	5.2469	Irgm2	3.44624	Uqcr11	4.30841	Dzip1	0.56514
Ace	Samd14	Dgke	Hcrt	Col1a1	Evi2		Pthlh	-0.807626	N4bp2	5.3235	1700007B14Rik	-0.140795	Hrh2	1.72671	Atp11a	3.40851	Wdr78	4.59271
Taco1	Pdk2	Nog	Ghdc	Ppp1r9b	Rab11fip4		Fam189b	3.66101	Apip	2.73742	Klc3	-0.323246	Pak4	3.10704	Cul4b	3.75052	Enpp2	11.0646
Strada	Itga3	Hlf	Stat5b	Samd14	Utp6		Bola2	2.03531	Zfp786	1.29702	Gm14410	4.02815	Mex3a	2.01742	Akr1b10	3.83608	Mc4r	2.14318
Ccdc47	Kat7	Cox11	Stat3	Pdk2	Suz12		Morc2b	4.0836	Ky	2.17737	Plekhn1	1.82655	Myl4	0.128481	Hrsp12	4.80538	Cldn2	4.06499
Ddx42	Slc35b1	Car10	Cavin1	Kat7	Crlf3		Gab2	4.57837	Carns1	2.01667	Il4ra	1.7126	Ccdc134	-0.682797	Myo5b	4.72202	Nde1	4.52899
Ftsj3	Spop	Utp18	Atp6v0a1	Slc35b1	Adap2		Cpm	4.23787	Wfdc2	1.20056	Rnaseh2a	3.18523	Irf5	1.20301	Tcirg1	3.31408	Alas2	2.44885
Psmc5	Nxph3	Mbtd1	Naglu	Nxph3	Rhot1		Klhdc7a	4.07851	Dnajc3	6.43247	Zfp335	4.76543	Acad12	1.78411	Cebpa	2.46862	Lrrc32	1.83367
Smarcd2	Zfp652	Spag9	Hsd17b1	Phb	Rhbdl3		Gpr115	1.12811	Timeless	1.80333	Acot1	2.65409	Cald1	4.97516	Gltscr1	3.38805	Cartpt	0.367364
Icam2	Phospho1	Tob1	Coasy	Zfp652	5730455P16Rik		Capn3	3.20809	Sncg	1.09718	Upf3b	4.54343	Bank1	0.873423	Zpbp	0.845903	Ntng1	1.38778
Ern1	Abi3	Wfikkn2	Retreg3	Phospho1	Zfp207		Man2a1	5.0224	Slc2a10	-0.077944	Soga1	5.62312	Rab11fip1	3.09574	Ltv1	4.07878	Pfkfb3	4.74323
Tex2	Gngt2	Luc7l3	Tubg1	Gngt2	Psmd11		Itgb3	1.41363	Sart1	4.97186	Scd1	7.55305	Bola3	3.15134	Dnajc21	4.99318	Trim8	5.90801
Ddx5	Snf8	Ankrd40	Plekhh3	Snf8	Cdk5r1		Kl	6.84793	Ptp4a1	6.2074	Hdac4	5.39648	Wdr52	5.17077	Spata13	5.09451	Gstm4	2.59178
1810010H24Rik	Atp5g1	Abcc3	Cntnap1	Atp5g1	Tmem98		Klhl26	0.225584	Phyh	6.14397	N4bp2	5.08688	Catsper2	3.08437	Klhl36	1.30462	Ppp1r36	1.7948
Bptf	Nfe2l1	Cacna1g	Wnk4	Snx11	Asic2		Pomt1	3.66781	Thap2	-0.342854	Apip	2.94397	Slc29a1	2.82196	Pum2	2.79816	Edf1	4.87487
Psmd12	Cdk5rap3	Chad	Becn1	Nfe2l1	Ccl12		Rhobtb1	1.67907	mt-Nd4	11.0933	Zfp786	2.24249	Dsg2	4.07131	Zbbx	2.90281	Ccdc170	2.63644
Cacng1	Pnpo	Acsf2	Aoc2	Cdk5rap3	Zfp830		Gpr17	5.36355	Oxa1l	3.75517	Ky	1.27233	Zfp51	3.04968	Myh14	4.90953	Emcn	2.93348
Cacng5	Sp2	Lrrc59	Ptges3l	Pnpo	Lig3		Rab39	1.44565	4930447C04Rik	4.06701	Carns1	2.30674	Fdx1	2.67796	Wbscr22	3.17771	Madd	3.85428
Prkca	Mrpl10	Eme1	Vat1	Sp2	Fndc8		Hcfc1r1	4.3179	Atf6b	4.59874	Dnajc3	6.34593	Mybl1	2.25926	Mamdc2	1.81425	Nfatc1	2.96883
Axin2	Tbkbp1	Mrpl27	Rnd2	Mrpl10	Nle1		Gnl3	4.27844	Parp9	3.05962	Timeless	0.684722	Cd320	3.78536	Dlec1	2.04082	Dnah6	5.77451
Rgs9	Kpnb1	Xylt2	Tmem106a	Osbpl7	Slfn2		Smtnl2	0.149854	AK010878	3.05962	Sncg	0.584619	3110007F17Rik	0.581262	Maz	5.36434	Mtrf1l	3.46612
Arsg	Npepps	Ppp1r9b	Arl4d	Tbkbp1	Ap2b1		Stab1	3.75345	Rdm1	0.245858	Slc2a10	0.684722	Igf2	6.59106	Il18bp	3.5625	Phf13	3.7565
Wipi1	Socs7	Samd14	Dhx8	Kpnb1	Rasl10b		Igfbp2	4.43817	Tspan18	4.39586	Sart1	4.92233	Asb16	1.16029	Kcng2	3.93811	Clec1a	1.7948
Prkar1a	Arhgap23	Pdk2	Sost	Npepps	Gas2l2		Rgp1	5.04609	Mavs	1.86757	Ptp4a1	5.97785	Gpr156	0.581262	Gpt	2.0668	Trim71	1.71375
Fam20a	4933428G20Rik	Itga3	Dusp3	Mrpl45	Taf15		B4galnt3	-0.200439	Chpt1	6.50242	Phyh	6.13982	Cep41	3.17299	PLA2G4B	1.16731	Vsig2	1.90842
Abca5	Srcin1	Kat7	Mpp3	Socs7	Heatr9		Sema4a	4.0159	Lypla1	5.22884	Thap2	0.021151	Tssk4	0.372562	Ocln	5.19803	Rtn4rl2	3.33678
Map2k6	Epop	Slc35b1	Cd300lg	Arhgap23	Heatr6		Prrg1	3.88772	Arid5b	5.312	mt-Nd4	11.1116	Fzd4	2.15433	Cad	4.19522	Sipa1	3.30946
Sox9	Mllt6	Spop	Mpp2	4933428G20Rik	Ddx52		Fam57b	4.28287	Gm10642	-1.08735	Oxa1l	4.24861	6720489N17Rik	1.07086	Tgm2	0.431738	Kmt2b	4.63184
Sstr2	Cisd3	Nxph3	Tmem101	Srcin1	Synrg		Fam114a1	2.43684	Tsen54	1.1498	4930447C04Rik	3.9448	P2rx3	1.28483	Reep4	-0.151482	Poln	0.257282
Cog1	Pcgf2	Zfp652	Lsm12	Epop	Dusp14		Pkib	3.26304	Kcnj8	0.985817	Atf6b	5.11406	Prkcsh	5.52659	Ppp1r3b	1.65214	Eif4ebp2	4.55249
Slc39a11	Pip4k2b	Phospho1	G6pc3	Mllt6	Znhit3		Ntn4	2.54426	Serpinb1b	0.926736	Parp9	2.29094	Clrn1	1.07086	Hpgd	3.47791	Gmnc	4.2983
Mtnap1	Cwc25	Gngt2	Tmub2	Cisd3	Car4		Nr4a1	4.74204	Agtr2	-0.077944	AK010878	3.44279	3110082I17Rik	2.50097	Carf	2.14203	Sox21	3.22424
Cpsf4l	Rpl23	Snf8	Atxn7l3	Pcgf2	Usp32		Mrps28	1.12811	Ubash3a	-0.204327	Rdm1	1.13751	3830403N18Rik	-1.49704	Wdr25	2.94543	Slc2a6	0.65471
Cdc42ep4	Lasp1	Ube2z	Ubtf	Psmb3	1700125H20Rik		Serhl	2.13687	Fam122a	1.73609	Tspan18	4.08421	Wdr66	2.91483	Zfp324	4.04651	Ltbp3	4.65915
Sdk2	Plxdc1	Hoxb13	Grn	Pip4k2b	Appbp2		Col4a5	3.45619	Dad1	4.08738	Mavs	2.85007	Slc4a2	5.29198	Trim30d	1.75157	Zfpm1	3.90079
Ttyh2	Arl5c	Snx11	Fam171a2	Cwc25	Ppm1d		Cyp4f13	2.84966	Pifo	0.985817	Chpt1	6.30621	Cry1	3.83373	Rab38	0.262249	Tmppe	4.45612
Dnai2	Cacnb1	Nfe2l1	Itga2b	1700001P01Rik	Bcas3		1700026L06Rik	-1.35129	Zfp599	2.86878	Lypla1	5.3572	Adamtsl2	1.96874	Aspdh	0.845903	Nefh	4.76351
Kif19a	Rpl19	Cdk5rap3	Gpatch8	Rpl23	Ints2		Rprd1a	6.91808	Fam189b	3.64951	Arid5b	5.30507	Gm10093	1.2445	Slc16a10	2.58104	Vegfb	4.24882
Btbd17	Stac2	Pnpo	Ccdc43	Lasp1	Med13		Tango2	3.96156	Bola2	1.1498	Dach2	1.36577	Lhfpl4	6.29658	4930518I15Rik	2.16626	Kdm6b	5.64934
Cd300a	Fbxl20	Sp2	Adam11	Plxdc1	Rnft1		Zfp217	2.43684	Morc2b	4.39586	Tsen54	1.5092	Pcp4	2.13239	Dzip1	1.21455	Abi3	0.56514
Nherf1	Med1	Sp6	Eftud2	Arl5c	Rps6kb1		Psmb8	0.225584	Gab2	4.2885	Kcnj8	1.10174	Arhgef16	0.2957	Wdr78	4.70145	1700017B05Rik	3.80622
Tmem104	Cdk12	Scrn2	Gfap	Cacnb1	Vmp1		Zc3h18	4.98475	Cpm	4.72981	Serpinb1b	1.39562	En2	0.036992	Enpp2	10.3616	Brat1	1.53658
Grin2c	Neurod2	Mrpl10	C1ql1	Rpl19	Ptrh2		Tagln2	1.50764	Klhdc7a	4.24684	Slfnl1	-0.532158	Pm20d2	2.64736	Mc4r	2.98684	Lrrc9	3.51478
Fdxr	Ppp1r1b	Tbkbp1	Plcd3	Stac2	Cltc		Fst	0.771789	Gpr115	0.926736	Agtr2	0.778328	Zbtb26	4.85975	Cldn2	3.62502	Pigh	3.42852
Otop3	Stard3	Kpnb1	Acbd4	Fbxl20	Gdpd1		Trim21	1.53767	Capn3	3.28804	Fam122a	2.62918	Myo1f	1.83932	Nde1	4.43845	Shpk	0.89422
Hid1	Tcap	Socs7	Hexim1	Med1	Smg8		Homer1	8.23663	Man2a1	5.17908	Dad1	4.51991	Pinx1	3.69845	Alas2	2.14203	Bcl9l	4.92524
Cdr2l	Mien1	Arhgap23	Hexim2	Cdk12	Trim37		Prelp	4.76443	Itgb3	1.38744	Pifo	0.234371	Vwa3a	2.23887	Lrrc32	0.262249	Wrap53	3.2956
Mrpl58	Ormdl3	4933428G20Rik	Fmnl1	Neurod2	Ppm1e		Kdelr3	-0.533436	Kl	7.36736	Zfp599	2.61657	Chadl	1.57235	Cartpt	0.169401	Dennd2d	0.739043
Kctd2	Psmd3	Epop	Efcab15	Ppp1r1b	Sept4		Rabl3	2.88513	Klhl26	0.245858	Pthlh	-1.0709	Pnpt1	2.04116	Ntng1	1.16731	Arfrp1	1.97948
Armc7	Csf3	Cisd3	Spata32	Stard3	Mtmr4		Phc1	1.62416	Pomt1	3.78874	Fam189b	3.85634	Rab4b	1.02397	Atg4c	-0.413472	Dyx1c1	0.89422
Jpt1	Thra	Pcgf2	Arhgap27	Tcap	Hsf5		Rnh1	3.59115	Rhobtb1	1.43061	Bola2	2.55176	Nxpe2	0.705311	Pfkfb3	4.63789	1500009C09Rik	1.09957
Mif4gd	Nr1d1	Psmb3	Plekhm1	Mien1	Tspoap1		Pnkp	3.54755	Gpr17	5.65914	Morc2b	3.92958	Polr3d	4.23978	Trim8	5.70136	Efcab1	3.2388
Slc25a19	Msl1	Pip4k2b	Rprml	Ormdl3	Mpo		Col4a6	1.50764	Rab39	0.80078	Gab2	4.81597	Alg12	3.46391	Gstm4	2.01437	Col8a1	4.95199
Grb2	Rapgefl1	Cwc25	Gosr2	Csf3	Dynll2		Aasdh	1.73196	Hcfc1r1	3.6125	Cpm	3.85096	Ccdc55	4.17151	Ppp1r36	0.583392	Dtna	3.66246
Caskin2	Wipf2	Rpl23	Wnt3	Med24	Vezf1		Trp53inp1	5.34031	Gnl3	4.09411	Klhdc7a	3.96982	9030624G23Rik	-1.80033	Edf1	3.61626	Lrrc71	0.818717
Llgl2	Cdc6	Lasp1	Nsf	Thra	Cuedc1		Setd8	5.11492	Smtnl2	1.29702	Gpr115	1.58887	Rgs6	2.23887	Ccdc170	1.16731	B3gnt5	0.257282
Smim5	Rara	Plxdc1	Mapt	Nr1d1	Mrps23		Hhip	2.99741	Stab1	3.71208	Capn3	3.34674	Nav1	1.02397	Emcn	3.34625	Ndst3	1.87153
Smim6	Gjd3	Arl5c	Kansl1	Msl1	Msi2		R3hcc1l	4.85365	Igfbp2	4.28262	Man2a1	4.88861	Crocc	5.71732	Madd	4.27537	Plvap	2.23317
Sap30bp	Igfbp4	Cacnb1	Cdc27	Rapgefl1	Akap1		Mdfic	3.2809	Rgp1	5.04661	Itgb3	1.5092	Gprin2	-0.847396	Nfatc1	3.3356	Ccdc13	2.04721
Galk1	Smarce1	Rpl19	Tlk2	Wipf2	Coil		Ltbr	1.83227	B4galnt3	-0.204327	Kl	6.38645	Ccdc9	4.18223	Dnah6	4.63355	Sulf1	6.10559
Unc13d	Krt222	Stac2	Mrc2	Cdc6	Mmd		Chgb	8.06976	Sema4a	3.57451	Klhl26	0.477048	Plp1	8.19778	Mtrf1l	4.18339	Tbx3	1.38778
Wbp2	Krt10	Fbxl20	Cyb561	Rara	Hlf		Mrpl40	2.95354	Prrg1	4.32327	Pomt1	3.76781	Tll1	2.51799	Phf13	3.69331	Plekhf1	1.94439
Trim65	Krt12	Med1	Ace	Gjd3	Stxbp4		Chchd10	4.67608	Gm10778	1.47252	Rhobtb1	1.93216	Taf7l	-0.535069	Clec1a	1.26029	Spag17	2.04721
Mrpl38	Krt9	Cdk12	Taco1	Igfbp4	Cox11		Epha8	0.66703	Fam57b	3.93082	Gpr17	5.07309	Kif9	3.75697	Trim71	2.34671	Mfsd10	2.59178
Evpl	Hap1	Neurod2	Map3k3	Smarce1	Car10		Map3k13	5.33605	Fam114a1	1.51326	Rab39	1.53625	3110052M02Rik	3.57379	Vsig2	0.349481	Timmdc1	4.2773
Srp68	Jup	Ppp1r1b	Limd2	Krt222	Utp18		Pyroxd2	1.12811	Pkib	2.72013	Hcfc1r1	4.57312	Enpep	3.55742	Rtn4rl2	2.81358	A230072I06Rik	-0.471164
Exoc7	Fkbp10	Tcap	Ccdc47	Krt10	Mbtd1		Trim12a	2.07679	Ntn4	2.55438	Gnl3	4.56985	Cmss1	2.01742	Sipa1	2.79816	Il10rb	2.29019
Foxj1	Nt5c3b	Erbb2	Ddx42	Krt12	Nme2		Plk3	1.92605	Nr4a1	4.15972	Smtnl2	-0.140795	BC067074	3.54086	Kmt2b	4.65083	9330161L09Rik	-0.293092
Rnf157	Klhl11	Mien1	Ftsj3	Krt9	Nme1		Adipor2	6.10924	Mrps28	0.733423	Stab1	3.76781	Cwc15	4.80534	Poln	0.431738	Tbccd1	3.17967
Sphk1	Acly	Ormdl3	Smarcd2	Hap1	Spag9		Zfp821	3.71456	Serhl	2.1518	Igfbp2	4.44338	Ifitm7	0.819534	Eif4ebp2	4.26419	Paox	0.138102
Cygb	Cnp	Psmd3	Icam2	Jup	Tob1		3100002H09Rik	0.149854	Col4a5	3.72947	Rgp1	5.10957	Rmdn2	3.31607	Gmnc	3.5625	Cox17	3.69449
Prcd	Dnajc7	Csf3	Tex2	Nt5c3b	Luc7l3		0610010F05Rik	1.24191	Cyp4f13	2.8844	Sema4a	4.38133	Rbm41	4.96589	Sox21	2.84394	Tpm3-rs7	1.58295
Mxra7	Dhx58	Med24	Ddx5	Klhl11	Ankrd40		Prodh	3.97259	1700026L06Rik	-0.667601	Prrg1	3.70364	Atp7a	5.16538	Slc2a6	1.42999	Pdia6	6.46878
Jmjd6	Hspb9	Thra	Smurf2	Cnp	Abcc3		Mbd6	4.29171	Adhfe1	-0.204327	Fam57b	4.54676	Pygl	3.30631	Ltbp3	3.87335	Gm12216	0.56514
Mgat5b	Rab5c	Nr1d1	1810010H24Rik	Dnajc7	Cacna1g		Eva1a	2.68505	Rprd1a	6.98842	Fam114a1	3.04159	Col8a2	2.8625	Zfpm1	3.60744	Grk6	3.4029
Sec14l1	Hcrt	Msl1	Bptf	Hspb9	Spata20		Myrf	5.33391	Tango2	3.9532	Pkib	3.47111	Lrguk	1.96874	Tmppe	4.70145	Emp3	0.138102
Septin9	Stat5b	Rapgefl1	Psmd12	Hcrt	Rsad1		Sh3rf3	5.17107	Cacna2d4	1.38744	Ntn4	2.57803	Ppp1r3d	2.72269	Nefh	4.33537	Rsph3b	1.83367
Tnrc6c	Stat3	Wipf2	Cacng1	Stat5b	Chad		Slc17a8	2.55898	Zfp217	2.57377	Nr4a1	5.01898	Slc37a1	2.27936	Vegfb	3.6424	Cidea	1.83367
Tmc6	Cavin1	Cdc6	Cacng5	Stat3	Lrrc59		Fv1	2.3034	Psmb8	-0.077944	Mrps28	1.48163	Tec	2.25926	Kdm6b	5.28358	Fam167a	2.3717
Syngr2	Atp6v0a1	Rara	Prkca	Cavin1	Eme1		Mob3c	2.01411	Zc3h18	4.86577	Serhl	1.82655	Scml2	1.63609	Abi3	1.42999	Emx2	4.1826
Cyth1	Naglu	Gjd3	Axin2	Atp6v0a1	Mrpl27		Mcts2	3.20809	Tagln2	1.51326	Col4a5	3.12414	Zbtb48	2.53481	1700017B05Rik	4.21277	Tjap1	2.89723
Usp36	Retreg3	Igfbp4	Rgs9	Naglu	Ppp1r9b		Acnat1	-0.014687	Fst	0.339436	Cyp4f13	3.07887	Adam33	0.763553	Brat1	1.71918	Fam50a	3.83525
Cep295nl	Tubg1	Smarce1	Gna13	Coasy	Samd14		Polm	1.97075	Lrrc38	-0.204327	1700026L06Rik	-1.44116	Trim56	3.86067	Lrrc9	2.87367	Daxx	3.61861
Timp2	Tubg2	Krt222	Slc16a6	Mlx	Pdk2		Nkain1	1.00457	Trim21	1.70126	Rprd1a	7.19824	Hmgn5	3.8132	Pigh	3.74249	Prkcq	4.48693
Lgals3bp	Plekhh3	Krt24	Arsg	Tubg1	Tac4		Gm11808	0.297535	Homer1	8.19698	Tango2	3.86703	Lbp	3.99436	Shpk	2.50708	Irf2bp2	6.77998
Engase	Cntnap1	Krt12	Wipi1	Tubg2	Kat7		Atp5j	6.07766	Prelp	4.25286	Cacna2d4	0.908249	Sh3gl1	4.29513	Bcl9l	4.38267	Rpl23	3.28161
Cbx8	Ezh1	Krt20	Prkar1a	Plekhh3	Nxph3		Ifitm1	0.297535	Rabl3	2.8046	Zfp217	2.35311	Mpp7	3.30631	Wrap53	3.16574	Kdelc2	3.26748
Cbx4	Vps25	Krt9	Fam20a	Cntnap1	Phb		Cfp	3.1893	Phc1	1.51326	Psmb8	1.10174	Ifrd2	1.91835	Arfrp1	2.66845	Pafah1b3	1.87153
Tbc1d16	Wnk4	Hap1	Abca8b	Ezh1	Zfp652		Srrd	2.76336	Rnh1	3.16563	Zc3h18	4.95276	Sorbs3	4.12228	Dyx1c1	0.845903	Hist1h2bc	4.77853
Ccdc40	Coa3	Jup	Abca5	Wnk4	Phospho1		Ccdc30	4.60697	Pnkp	3.43308	Tagln2	2.04946	Eogt	3.98827	1500009C09Rik	1.65214	Slc46a1	2.14318
Gaa	Becn1	P3h4	Map2k6	Coa3	Gngt2		Syde1	2.60223	Col4a6	1.70126	Fst	0.988787	Chga	5.48824	Efcab1	3.2475	Zc3h3	4.46852
Sgsh	Psme3	Nt5c3b	Sox9	Becn1	Snf8		Cdc26	3.06081	Aasdh	1.73609	Trim21	1.17242	Lrriq1	3.84051	Col8a1	4.4032	Utp14a	4.70705
Endov	Aoc2	Klhl11	Sstr2	Psme3	Ube2z		Cars2	1.65187	Trp53inp1	5.70162	Homer1	8.19987	Zscan29	4.22949	Dtna	3.54413	Aldh2	5.62739
Nptx1	Aarsd1	Cnp	Cog1	Aoc2	Atp5g1		Dsc2	0.771789	Setd8	5.29166	Prelp	4.9727	Myom3	0.64462	Lrrc71	1.06792	Mtfmt	3.58482
Rptor	Ptges3l	Dnajc7	Slc39a11	Aarsd1	Snx11		Zfp109	2.97564	Hhip	3.80524	Kdelr3	0.477048	Golga4	7.1776	B3gnt5	1.68605	Aard	0.008183
Chmp6	Rpl27	Nkiras2	Mtnap1	Ptges3l	Nfe2l1		Tmem176b	3.60539	R3hcc1l	4.88141	Rabl3	2.93383	Gpr98	4.0885	Ndst3	2.09232	Gm20695	-0.674351
Aatk	Vat1	Kat2a	Cpsf4l	Rpl27	Copz2		Tut1	3.70135	Mdfic	3.52558	Phc1	1.63964	Mrpl19	4.88293	Plvap	1.16731	Nfkbie	1.4391
Cep131	Rnd2	Hspb9	Cdc42ep4	Vat1	Cdk5rap3		Lars2	4.58557	Ltbr	0.865132	Rnh1	3.69166	Ttyh2	4.75957	Ccdc13	2.85888	Des	0.56514
Ndufaf8	Arl4d	Rab5c	Sdk2	Rnd2	Sp2		Gm16503	1.27793	Chgb	8.27825	Pnkp	3.64892	Ppard	3.43732	Sulf1	5.75026	Ubxn11	2.61428
Slc38a10	Dhx8	Hcrt	Ttyh2	Arl4d	Osbpl7		Retsat	3.20809	Mrpl40	2.8046	Col4a6	1.42486	Mb21d1	1.02397	Tbx3	2.52592	Ccdc138	3.1645
Bahcc1	Sost	Stat5b	Dnai2	Dhx8	Kpnb1		Haus8	1.94857	Chchd10	4.24079	Aasdh	1.42486	Neu4	3.12936	Plekhf1	1.30462	1110034G24Rik	2.59178
Fscn2	Dusp3	Stat3	Cd300ld5	Sost	Npepps		Peli3	3.47182	Epha8	0.51014	Trp53inp1	5.23043	Tc2n	2.64736	Spag17	1.75157	Gm14420	4.48693
Faap100	Cd300lg	Cavin1	Cd300ld4	Dusp3	Socs7		Fkbp2	3.84033	Map3k13	5.38788	Setd8	5.1539	Ticam1	2.25926	Mfsd10	1.68605	Folh1	3.4029
Nploc4	Mpp2	Atp6v0a1	Nherf1	Mpp3	Arhgap23		Ralb	3.77251	Pyroxd2	1.34294	Hhip	3.03212	B9d2	2.04116	Timmdc1	4.15945	Cep110	5.42587
Ccdc137	Tmem101	Naglu	Nat9	Cd300lg	4933428G20Rik		Sesn2	2.48386	Trim12a	2.25147	R3hcc1l	4.79372	Snx9	3.95741	Il10rb	1.46947	P4ha1	6.28287
Hgs	Lsm12	Hsd17b1	Grin2c	Mpp2	Srcin1		Eif5b	6.4729	Plk3	1.59142	Mdfic	3.15937	Nefm	6.78191	9330161L09Rik	0.583392	Fancf	0.965968
Mrpl12	G6pc3	Coasy	Fads6	Tmem101	Epop		Sema4f	4.87439	Adipor2	6.46658	Ltbr	2.06812	Iba57	2.2182	Tbccd1	2.84394	Zbtb7b	3.7766
Slc25a10	Tmub2	Mlx	Otop3	Lsm12	Mllt6		Oca2	1.78299	Zfp821	3.6856	Chgb	7.88242	Mki67	2.27936	Paox	0.262249	Slc7a2	5.84042
Mcrip1	Atxn7l3	Retreg3	Hid1	G6pc3	Cisd3		Ago3	5.91133	3100002H09Rik	0.985817	Npc1l1	0.360806	Nt5dc1	3.11824	Cox17	3.82851	Tsc22d3	5.94399
P4hb	Ubtf	Tubg1	Cdr2l	Tmub2	Psmb3		Apln	3.45619	0610010F05Rik	1.38744	Mrpl40	3.15064	Card6	2.35707	Tpm3-rs7	0.961179	Gm10094	2.56892
Alyref	Rundc3a	Tubg2	Mrpl58	Atxn7l3	Pip4k2b		Ppil4	5.69527	Prodh	3.82963	Chchd10	4.81873	Mrps18a	3.66828	Pdia6	6.57465	Pabpc5	2.78269
Pcyt2	Slc25a39	Plekhh3	Kctd2	Ubtf	Cwc25		BC021891	1.24191	Mbd6	3.86153	Epha8	1.23979	Arrdc2	2.92762	Gm12216	1.11847	Rhoc	2.61428
Mafg	Grn	Cntnap1	Armc7	Rundc3a	Rpl23		Ccnd3	3.87602	Eva1a	3.0458	Map3k13	5.42389	Tbata	2.70793	Grk6	3.38805	Id1	2.65826
Fasn	Fam171a2	Ezh1	Sumo2	Slc25a39	Lasp1		Crot	5.41904	Myrf	5.8098	Pyroxd2	-0.229138	Insl5	0.445535	Emp3	0.349481	Gm101	0.257282
Ccdc57	Itga2b	Wnk4	Nup85	Grn	Arl5c		Elovl2	4.2055	Sh3rf3	5.18855	Trim12a	1.68869	Gng5	4.60489	Rsph3b	0.349481	Irs2	5.31346
Slc16a3	Gpatch8	Coa3	Gga3	Fam171a2	Cacnb1		Hist3h2a	3.96709	Slc17a8	3.24032	Plk3	2.19236	Trp73	1.91835	Cidea	2.04082	Disp1	2.20379
Csnk1d	Fzd2	Becn1	Mrps7	Itga2b	Rpl19		Eral1	2.8734	Fv1	2.34469	Adipor2	5.72803	Tbc1d4	4.31474	Fam167a	1.34763	Mfsd2a	3.59617
Ogfod3	Ccdc43	Psme3	Mif4gd	Gpatch8	Stac2		Galnt3	3.47958	Mob3c	2.1518	Zfp821	3.72731	Aldh1l1	5.721	Emx2	4.44836	Sox1	4.63184
Cybc1	Adam11	Aoc2	Grb2	Fzd2	Fbxl20		Plod2	3.53272	Mcts2	3.31133	3100002H09Rik	0.095781	Slc2a1	5.91335	Tjap1	2.59895	Mfsd12	3.87306
Narf	Gjc1	Aarsd1	Caskin2	Ccdc43	Med1		Park7	1.24191	Acnat1	0.038255	0610010F05Rik	1.36577	Uqcr11	4.7879	Fam50a	3.95906	Chka	6.57441
Foxk2	Eftud2	Rundc1	Smim5	Gjc1	Cdk12		Bcar3	3.16065	Polm	1.47252	Prodh	3.89864	Atp11a	3.17299	Daxx	3.62502	Tatdn1	0.008183
Wdr45b	Gfap	Ptges3l	Smim6	Eftud2	Ppp1r1b		Efcab5	3.45619	Nkain1	1.59142	Mbd6	4.39248	Cul4b	4.05974	Prkcq	3.72628	Dcp1a	3.70501
Rab40b	C1ql1	Rpl27	Recql5	Gfap	Mien1		BC005624	4.94049	Gm11808	-0.342854	Eva1a	3.06035	Akr1b10	3.77123	Irf2bp2	6.63232	Llph	3.4537
Fn3krp	Nmt1	Vat1	Sap30bp	C1ql1	Ormdl3		Lman2	5.86324	Atp5j	5.69499	Myrf	5.09144	Hrsp12	5.27706	Rpl23	3.27004	Krcc1	4.44988
Fn3k	Acbd4	Rnd2	Itgb4	Nmt1	Psmd3		Mppe1	2.82553	Ifitm1	0.588471	Sh3rf3	5.22836	Myo5b	4.62466	Kdelc2	3.61626	Gm5506	1.03432
Tbcd	Hexim1	Arl4d	Galk1	Acbd4	Csf3		Safb2	5.52587	Cfp	3.4852	Slc17a8	2.17525	Tcirg1	2.80819	Pafah1b3	0.169401	Iqce	5.63566
Rab10	Hexim2	Dhx8	Unk	Hexim1	Thra		Prpf3	4.80819	Srrd	2.27534	Fv1	2.24249	Cebpa	2.19722	Hist1h2bc	3.73441	Zfp444	3.5267
Asxl2	Fmnl1	Etv4	Unc13d	Hexim2	Nr1d1		Edem2	3.97259	Ccdc30	4.55551	Mob3c	2.14041	Gltscr1	4.43609	Slc46a1	1.84459	Crcp	3.10218
Dtnb	1700023F06Rik	Sost	Wbp2	Fmnl1	Msl1		Ppp1r1b	4.55654	Syde1	1.7701	Mcts2	3.30016	Zpbp	-0.060693	Zc3h3	4.30841	Kif23	0.56514
Dnmt3a	Spata32	Dusp3	Trim65	1700023F06Rik	Rapgefl1		Fam43a	2.42082	Cdc26	3.12678	Polm	1.61448	Ltv1	4.04807	Utp14a	5.12264	Hes1	2.54569
Pomc	Arhgap27	Mpp3	Mrpl38	Arhgap27	Wipf2		S1pr5	2.80098	Cars2	0.588471	Nkain1	0.531836	Dnajc21	5.27956	Aldh2	5.28635	Pin1	4.81299
Dnajc27	Plekhm1	Cd300lg	Fbf1	Plekhm1	Cdc6		Cep250	5.07197	Dsc2	1.2496	Gm11808	0.988787	Spata13	5.10753	Mtfmt	4.06596	Ears2	3.11802
Adcy3	Rprml	Mpp2	Evpl	Rprml	Rara		Bahd1	4.82655	Zfp109	2.98918	Atp5j	6.11088	Klhl36	1.2445	Aard	-0.036407	Wbp1l	5.21751
Cenpo	Gosr2	Tmem101	Srp68	Gosr2	Gjd3		Nfic	5.30584	Tmem176b	3.16563	Ifitm1	-0.057551	Pum2	3.04968	D19Ertd737e	-0.413472	Ovgp1	2.42359
Ptrhd1	Crhr1	G6pc3	Galr2	Nsf	Igfbp4		Enthd2	3.09149	Tut1	3.52558	Cfp	2.96403	Zbbx	2.78025	Gm20695	-0.276538	Mterf	2.67976
Itsn2	Mapt	Tmub2	Exoc7	Crhr1	Smarce1		Gpr68	3.49496	Lars2	4.43349	Srrd	2.92362	Myh14	4.72334	Nfkbie	0.845903	Sh3bp1	3.47844
Pfn4	Kansl1	Atxn7l3	Foxj1	Mapt	Krt222		Kank3	3.82215	Gm16503	1.62897	Ccdc30	4.41086	Wbscr22	3.66064	Des	0.509557	Gm14393	2.63644
Fkbp1b	Tlk2	Ubtf	Rnf157	Kansl1	Krt26		Recql4	0.821448	Retsat	3.20345	Syde1	2.7839	Mamdc2	1.28483	Ubxn11	1.3894	Traip	4.59836
Wdcp	March10	Rundc3a	Prpsap1	Cdc27	Krt10		Sipa1l3	7.23221	Haus8	1.62897	Cdc26	2.96403	Dlec1	1.86615	Ccdc138	2.48798	Bdh2	1.03432
Ubxn2a	Tanc2	Slc25a39	Sphk1	Tlk2	Krt12		Cdhr3	2.40462	Peli3	3.03185	Cars2	2.15794	Maz	6.01125	1110034G24Rik	1.87431	Spsb1	4.63184
Atad2b	Cyb561	Grn	Cygb	Mrc2	Krt15		Ppig	6.61521	Fkbp2	3.5841	Dsc2	0.684722	Il18bp	3.91307	Gm14420	4.24156	Fhit	-0.674351
Klhl29	Ace	Fam171a2	St6galnac2	March10	Krt9		Psmc3ip	0.431493	Ralb	3.45415	Zfp109	3.03212	Kcng2	4.00043	Folh1	4.20109	Mt2	6.3244
Ldah	Dcaf7	Itga2b	Mxra7	Tanc2	Eif1		Ace	5.7363	Sesn2	2.47412	Tmem176b	3.6735	Gpt	3.25648	Cep110	5.5826	Fam20a	3.9809
Hs1bp3	Taco1	Gpatch8	Jmjd6	Cyb561	Hap1		Mrps15	3.6473	Eif5b	6.64327	Tut1	3.81827	Ocln	4.75598	P4ha1	6.3285	Slc31a2	3.28161
Rhob	Map3k3	Fzd2	Mgat5b	Ace	Nt5c3b		Mtx1	3.60539	Sema4f	4.82186	Lars2	4.63699	Cad	4.35318	Fancf	1.58182	Ddit3	2.91547
Pum2	Limd2	Ccdc43	Sec14l1	Dcaf7	Klhl10		Asphd1	2.42082	Oca2	2.51481	Gm16503	1.23979	Tgm2	2.01742	Zbtb7b	3.22461	Ttll3	4.47469
Osr1	Ccdc47	Adam11	Septin9	Map3k3	Klhl11		Myo9b	5.9799	Ago3	6.11118	Retsat	3.33908	Reep4	0.705311	Slc7a2	5.93436	Slc16a12	2.96883
Rdh14	Ddx42	Gjc1	Tnrc6c	Limd2	Cnp		Zmynd8	6.58228	Apln	3.36795	Haus8	2.19236	Ppp1r3b	3.12936	Tsc22d3	6.04793	Apold1	3.28161
Kcns3	Ftsj3	Higd1b	Tmc6	Ccdc47	Dnajc7		0610030E20Rik	4.50808	Ppil4	5.8521	Peli3	3.64271	Hpgd	4.23978	Gm10094	2.30367	Csf2rb2	0.65471
Smc6	Psmc5	Eftud2	Afmid	Ddx42	Nkiras2		Zfp575	1.34737	BC021891	1.38744	Fkbp2	4.07962	Carf	2.15433	Pabpc5	2.44901	Alpk1	3.41577
Mycn	Smarcd2	Gfap	Tk1	Ftsj3	Dhx58		Plin2	2.38823	Ccnd3	3.78042	Ralb	3.93974	Wdr25	3.04968	Rhoc	2.28166	Disc1	1.75485
Lratd1	Ern1	C1ql1	Cyth1	Psmc5	Kat2a		Kcnmb1	0.915915	Crot	5.28285	Sesn2	2.74964	Zfp324	3.88054	Id1	3.50666	Zfp882	4.3394
Trib2	Tex2	Nmt1	Usp36	Smarcd2	Hspb9		Aldh4a1	3.2809	Elovl2	3.99693	Eif5b	6.3488	Trim30d	0.128481	Gm101	0.784617	Ccs	3.11802
Lpin1	Ddx5	Plcd3	Cep295nl	Ern1	Ghdc		Tnip1	3.40009	Hist3h2a	4.13384	Sema4f	4.90945	Rab38	0.705311	Irs2	4.83591	Col9a3	5.11077
Ntsr2	Smurf2	Acbd4	Timp2	Tex2	Stat5b		Clec11a	1.5959	Eral1	3.05962	Oca2	1.45352	Aspdh	0.581262	Disp1	2.3885	1700109H08Rik	2.76268
Rock2	1810010H24Rik	Hexim1	Lgals3bp	Ddx5	Stat3		Cyp26b1	3.4244	Galnt3	3.56486	Ago3	5.79535	Slc16a10	3.42835	Mfsd2a	3.74249	Hcrtr1	-0.134605
Slc66a3	Bptf	Hexim2	Cant1	Smurf2	Cavin1		Ppp1r14a	1.7577	Plod2	3.50553	Apln	3.57259	4930518I15Rik	2.56787	Sox1	4.70559	Zfp330	4.30523
Kcnf1	Nol11	Fmnl1	Engase	1810010H24Rik	Atp6v0a1		Ficd	2.93109	Park7	0.038255	Ppil4	5.66815	Dzip1	1.50566	Mfsd12	3.85856	Srrm3	5.32374
Nol10	Psmd12	1700023F06Rik	Cbx4	Bptf	Coasy		Snx15	3.51018	Bcar3	3.19096	BC021891	1.39562	Wdr78	4.38135	Chka	6.66564	Gas2l1	4.66455
Hpcal1	Cacng1	Spata32	Tbc1d16	Nol11	Mlx		Pstpip2	2.86158	Map4k1	-0.342854	Ccnd3	3.76209	Enpp2	10.3537	Tatdn1	-0.276538	Ppap2c	1.22185
Gm9222	Cacng4	Arhgap27	Gaa	Psmd12	Psmc3ip		Rai1	5.9908	Efcab5	3.74666	Crot	5.47372	Mc4r	2.04116	Dcp1a	3.99333	Ccdc19	1.83367
Asap2	Prkca	Plekhm1	Sgsh	Cacng1	Retreg3		Amer2	5.20186	BC005624	4.85788	Elovl2	4.28893	Cldn2	4.03039	Llph	3.42868	A430033K04Rik	4.73812
Itgb1bp1	Cep112	Rprml	Endov	Cacng4	Tubg2		Fkbpl	1.73196	Lman2	5.70382	Hist3h2a	4.06112	Nde1	4.56859	Krcc1	4.18339	Slc15a4	4.44988
Cpsf3	Axin2	Gosr2	Nptx1	Prkca	Plekhh3		Paqr9	4.96556	Mppe1	2.82091	Eral1	2.91335	Alas2	2.11012	Gm5506	1.42999	St7l	3.25321
Iah1	Rgs9	Wnt3	Rptor	Cep112	Cntnap1		Nr1h4	-0.104575	Safb2	5.70821	Galnt3	3.37698	Lrrc32	1.39946	Iqce	5.62692	Hist1h2ag	-2.01427
Ywhaq	Gna13	Nsf	Chmp6	Axin2	Ezh1		Zswim4	3.45619	Chrnb4	-0.204327	Plod2	3.59848	Cartpt	-0.165477	Zfp444	3.22461	Atn1	6.46414
Cys1	Amz2	Crhr1	Baiap2	Rgs9	Wnk4		Ncor2	7.36843	Prpf3	4.98278	Park7	1.42486	Ntng1	2.01742	Crcp	3.10436	Tgif1	1.38778
Mboat2	Arsg	Mapt	Aatk	Gna13	Coa3		Zcwpw1	2.03531	Edem2	4.32327	Bcar3	3.13303	Atg4c	-0.060693	Kif23	1.90344	Stbd1	-0.134605
Id2	Wipi1	Kansl1	Cep131	Amz2	Psme3		Ddx55	4.80819	Ppp1r1b	4.64987	Map4k1	-0.140795	1810032O08Rik	-0.060693	Hes1	1.95997	Chpf	4.73812
Sox11	Prkar1a	Cdc27	Tepsin	Arsg	Aoc2		Nupl2	3.14123	Fam43a	2.66697	Efcab5	3.051	Pfkfb3	4.99048	Pin1	4.63355	Anks1	4.96079
Rnaseh1	Fam20a	Myl4	Ndufaf8	Wipi1	Aarsd1		Blm	2.82553	S1pr5	2.9452	BC005624	4.93509	Trim8	5.89393	Ears2	3.04025	Scube3	3.35025
Adi1	Abca8b	Tlk2	Slc38a10	Prkar1a	Ptges3l		Mzt2	2.3549	Cep250	5.2975	Lman2	5.87565	Gstm4	2.0875	Wbp1l	5.15327	4931440F15Rik	2.3717
Trappc12	Map2k6	Mrc2	Bahcc1	Fam20a	Vat1		Mkl1	5.44897	Bahd1	4.91979	Mppe1	2.8063	Ppp1r36	-0.682797	Ovgp1	3.12922	Tarbp2	2.82189
Eipr1	Kcnj2	Tanc2	Faap100	Abca8b	Rnd2		Foxk1	6.24167	Nfic	5.50359	Safb2	5.47547	Edf1	4.88948	Mterf	2.76681	Fgd3	3.49066
Myt1l	Sox9	Cyb561	Nploc4	Kcnj2	Tmem106a		Vars2	3.79755	Enthd2	2.47412	Prpf3	4.7597	Ccdc170	0.763553	Sh3bp1	3.79782	Racgap1	2.47368
Pxdn	Sstr2	Dcaf7	Ccdc137	Sox9	Dhx8		Sec14l2	5.42306	Gpr68	3.71208	Edem2	3.76781	Emcn	2.91483	Gm14393	3.76646	Cbx2	1.38778
Dld	Slc39a11	Taco1	Hgs	Slc39a11	Sost		Sass6	3.66101	Kank3	3.51559	Ppp1r1b	4.69516	Madd	4.33888	Traip	5.17732	Zbtb2	4.17505
Cbll1	Fam104a	Map3k3	Mrpl12	Sstr2	Dusp3		Vat1	3.272	Recql4	1.34294	Fam43a	1.89084	Nfatc1	3.08437	Bdh2	1.54534	Abcb4	2.95126
Bcap29	D11Wsu47e	Limd2	Slc25a10	Fam104a	Cfap97d1		Safb	6.53655	Sipa1l3	7.52381	S1pr5	2.73804	Dnah6	4.39983	Spsb1	4.36184	Morn2	-0.674351
Prkar2b	Cpsf4l	Ccdc47	Mcrip1	D11Wsu47e	Mpp3		Dexi	2.80098	Cdhr3	1.86757	Cep250	5.05684	Mtrf1l	3.66064	Fhit	1.3894	Msto1	2.93348
Ccdc71l	Cdc42ep4	Ddx42	P4hb	Cpsf4l	Cd300lg		Kif19a	1.0881	Ppig	6.62828	Bahd1	4.83243	Phf13	3.99436	Mt2	5.24997	Gimap6	2.29019
Atxn7l1	Sdk2	Ftsj3	Alyref	Cdc42ep4	Mpp2		Zfp560	3.94485	Psmc3ip	0.038255	Nfic	5.37791	Clec1a	2.48375	Fam20a	3.92397	Col13a1	0.739043
Polr1f	Ttyh2	Psmc5	Pcyt2	Sdk2	Tmem101		2410004B18Rik	3.85233	Ace	5.97929	Enthd2	3.08804	B4galt2	0.514994	Slc31a2	2.91716	Fxyd5	3.05361
Twist1	Dnaic2	Icam2	Sirt7	Ttyh2	Lsm12		Adam8	2.58796	Mrps15	3.81341	Gpr68	3.35436	Trim71	2.44868	Asb7	1.06792	Masp1	3.14918
Hdac9	Slc9a3r1	Tex2	Mafg	Dnaic2	Tmub2		Trp53inp2	6.98634	Mtx1	3.87722	Kank3	3.77351	Vsig2	1.53939	Ddit3	2.76681	Anxa2	3.50277
Ankmy2	Nat9	Ddx5	Aspscr1	Btbd17	Atxn7l3		Ptk7	2.76336	Asphd1	2.01667	Recql4	0.908249	Rtn4rl2	3.3733	Ttll3	4.23012	Gm9881	0.257282
Etv1	Grin2c	Smurf2	Cenpx	Slc9a3r1	Ubtf		Armcx6	1.24191	Myo9b	6.14883	Sipa1l3	7.0501	Sipa1	2.91483	Slc16a12	2.61664	Smim3	3.32318
Dock4	Fdxr	1810010H24Rik	Rfng	Nat9	Rundc3a		Elfn2	6.40836	Zmynd8	6.60727	Cdhr3	2.33782	Kmt2b	4.9154	Apold1	3.51612	Dnase1l2	2.80242
Immp2l	Fads6	Bptf	Gps1	Grin2c	Slc25a39		Pecr	1.90317	0610030E20Rik	4.80555	Ppig	6.62168	Poln	0.514994	Csf2rb2	0.961179	Cntf	-1.54663
Lrrn3	Hid1	Psmd12	Fasn	Fdxr	Grn		Vwf	4.45793	Zfp575	0.038255	Psmc3ip	0.866229	Eif4ebp2	4.58079	Alpk1	4.24725	Klf11	2.23317
Pnpla8	Cdr2l	Helz	Ccdc57	Otop3	Fam171a2		Tpgs1	2.03531	Plin2	2.22719	Ace	5.4401	Gmnc	4.07707	Disc1	2.21353	Ldhd	2.04721
Nrcam	Mrpl58	Cacng1	Slc16a3	Hid1	Itga2b		Midn	3.13142	Aldh4a1	3.31133	Mrps15	3.70364	Sox21	2.0875	Zfp882	4.61606	Casp12	1.2793
Stxbp6	Atp5h	Cacng4	Csnk1d	Cdr2l	Gpatch8		Omd	0.915915	Tnip1	2.97466	Mtx1	3.36194	Slc2a6	0.925372	Ccs	2.95937	5730559C18Rik	1.2793
Nova1	Kctd2	Cacng5	Uts2r	Mrpl58	Fzd2		Prrt1	5.48022	Clec11a	1.51326	Asphd1	2.42724	Ltbp3	4.2652	Col9a3	4.51591	Pdia4	6.04269
Foxg1	Armc7	Prkca	Ogfod3	Kctd2	Ccdc43		Dnah11	3.85233	Cyp26b1	3.40088	Myo9b	5.98523	Zfpm1	3.89364	1700109H08Rik	3.01379	Mitf	4.85611
Strn3	Jpt1	Axin2	Hexd	Armc7	Adam11		Naa10	2.97564	Ppp1r14a	1.2496	Zmynd8	6.54301	Tmppe	4.27023	Zfp330	4.36184	Slc29a4	4.5583
Hectd1	Gga3	Rgs9	Cybc1	Jpt1	Gjc1		C4b	2.55898	Ficd	2.38914	0610030E20Rik	4.32428	Nefh	4.94086	Srrm3	4.99994	Zfp551	2.82189
Dtd2	Mrps7	Gna13	Narf	Gga3	Eftud2		Stx4a	4.07339	Snx15	2.9452	Zfp575	1.73612	Vegfb	4.35318	Gas2l1	4.83213	Derl2	5.26451
Akap6	Mif4gd	Amz2	Foxk2	Mrps7	Gfap		Ndufaf2	1.7577	Pstpip2	2.7881	Plin2	2.36825	Kdm6b	5.55366	Ppap2c	-0.413472	Bche	3.37682
Npas3	Slc25a19	Slc16a6	Wdr45b	Mif4gd	C1ql1		Aasdhppt	-0.104575	Rai1	5.98111	Kcnmb1	1.33529	Abi3	1.63609	Ccdc19	1.01554	Upf3a	3.76659
Egln3	Caskin2	Wipi1	Fn3krp	Slc25a19	Nmt1		Bcorl1	4.91784	Amer2	5.21656	Aldh4a1	3.46408	1700017B05Rik	4.09419	A430033K04Rik	4.83213	Prkcd	5.72884
Fam177a2	Sap30bp	Prkar1a	Fn3k	Grb2	Plcd3		Tpst2	3.2809	Fkbpl	2.47412	Tnip1	3.44279	Brat1	1.96874	Slc15a4	4.25857	Gm6563	3.79641
Fam177a	Galk1	Fam20a	Tbcd	Caskin2	Acbd4		Cwc25	4.07339	Paqr9	5.00794	Clec11a	1.91165	Lrrc9	2.64736	St7l	3.2475	Slc35a4	4.604
Srp54c	H3f3b	Abca6	B3gntl1	Recql5	Hexim1		Top2a	2.55898	Nr1h4	0.51014	Cyp26b1	3.42843	Pigh	3.4551	Atn1	5.79563	Fam101b	4.12107
Nfkbia	Unk	Sox9	Rab10	Galk1	Fmnl1		Zc3h13	6.59125	Zswim4	3.64035	Ppp1r14a	2.01141	Shpk	1.96874	Tnfrsf11b	1.11847	Aar2	4.85138
Ralgapa1	Unc13d	Cog1	Asxl2	H3f3b	1700023F06Rik		Dio2	6.42351	Ncor2	7.44573	Ficd	3.24384	Bcl9l	4.8328	Stbd1	0.961179	Zfhx2	6.5425
Brms1l	Wbp2	Slc39a11	Dtnb	Unk	Spata32		Rims4	4.21017	Zcwpw1	2.53473	Snx15	3.88292	Wrap53	3.62181	Chpf	4.49215	Hexim2	2.1119
Mbip	Mrpl38	Fam104a	Dnmt3a	Unc13d	Map3k14		Luzp1	6.72529	Ddx55	4.61754	Pstpip2	2.45586	Dennd2d	0.581262	Anks1	4.96238	Acacb	3.83525
Mipol1	Fbf1	Cpsf4l	Pomc	Wbp2	Plekhm1		Rbm17	4.74847	Nupl2	3.17835	Rai1	6.00473	Arfrp1	2.11012	Akap1	0.169401	Rpl10-ps3	-0.910921
Trappc6b	Evpl	Cdc42ep4	Dnajc27	Mrpl38	Rprml		Elmo3	0.611652	Blm	3.00354	Amer2	5.0823	Dyx1c1	0.64462	Scube3	1.3894	BC031181	0.965968
Pnn	Srp68	Sdk2	Adcy3	Fbf1	Gosr2		Swsap1	2.7506	Mzt2	1.80333	Fkbpl	1.78205	1500009C09Rik	2.17593	4931440F15Rik	2.2366	Uxt	2.42359
Mia2	Galr2	Ttyh2	Cenpo	Ten1	Nsf		Rrp36	2.73773	Mkl1	5.55326	Paqr9	4.76828	Efcab1	2.9403	Tarbp2	2.59895	Spef2	4.23436
Togaram1	Exoc7	Dnaic2	Ptrhd1	Evpl	Arf2		Srek1ip1	4.15797	Foxk1	6.53369	Zswim4	3.53285	Col8a1	4.64029	Fgd3	3.45842	Htatsf1	5.99847
Prpf39	Foxj1	Kif19a	Itsn2	Srp68	Crhr1		Wdr16	1.5959	Vars2	3.85362	Ncor2	7.32484	Dtna	3.68345	Racgap1	2.88831	Taf5	3.17967
Fancm	Rnf157	Btbd17	Fam228a	Galr2	Sppl2c		Plin5	-0.807626	Sec14l2	5.35184	Zcwpw1	2.04946	Lrrc71	1.07086	Cbx2	0.509557	Agfg1	3.76659
Mdga2	Prpsap1	Cd300ld4	Fam228b	Exoc7	Mapt		Mgme1	2.37166	Rhno1	0.245858	Ddx55	4.73947	B3gnt5	0.64462	Zbtb2	4.86211	Ddx27	4.44361
Rps29	Sphk1	Cd300ld5	Pfn4	Foxj1	Kansl1		Gm9805	-2.23403	Sass6	3.6856	Nupl2	3.20222	Ndst3	2.39442	Abcb4	2.70199	Caskin2	4.43731
Rpl36al	Ube2o	Slc9a3r1	Wdcp	Rnf157	Cdc27		Acbd6	3.91085	Vat1	3.26438	Blm	2.69067	Plvap	1.99328	Msto1	3.39832	Mpst	3.03705
Klhdc2	Cygb	Nat9	Ubxn2a	Prpsap1	Mettl2		Sytl5	3.02946	Safb	6.56672	Mzt2	2.7839	Ccdc13	2.55143	Gimap6	1.58182	Uhrf1bp1	4.74323
Vcpkmt	Prcd	Grin2c	Atad2b	Sphk1	Tlk2		Loxl3	1.90317	Dexi	2.97466	Mkl1	5.43831	Sulf1	5.53706	Col13a1	0.262249	2010109A12Rik	-0.471164
Sos2	Mxra7	Fdxr	Klhl29	Ube2o	Mrc2		Snrnp40	3.8343	Kif19a	1.34294	Foxk1	6.10863	Tbx3	2.15433	Fxyd5	2.30367	Polr2k	3.46612
Atl1	Jmjd6	Fads6	Ldah	Cygb	Tanc2		Hist2h2aa2	-0.200439	Zfp560	3.94577	Vars2	3.75636	Gm10373	-1.03322	Masp1	2.98684	Mfap1a	5.32715
Map4k5	Srsf2	Otop3	Rhob	Prcd	Cyb561		Zfp583	3.65417	2410004B18Rik	3.20345	Sec14l2	5.39832	Plekhf1	1.02397	Anxa2	3.47791	Prr5	1.22185
Sav1	Mgat5b	Hid1	Pum2	Mxra7	Ace		Arhgap23	6.47775	Adam8	2.89984	Sass6	3.42119	Spag17	0.975515	Gm9881	0.583392	Jhdm1d	8.23836
Nin	Sec14l1	Cdr2l	Sdc1	Jmjd6	Kcnh6		Gfra2	4.68282	Trp53inp2	7.16096	Vat1	3.59848	Mfsd10	1.2445	Smim3	3.4682	Mphosph10	4.65915
Trim9	Sept9	Mrpl58	Laptm4a	Mgat5b	Dcaf7		Klhl38	-0.807626	Ptk7	2.63041	Safb	6.44471	Timmdc1	3.95116	Dnase1l2	2.34671	Xkr8	1.90842
Tmx1	Tnrc6c	Kctd2	Wdr35	Sec14l1	Taco1		Noc4l	2.86158	Armcx6	1.55287	Dexi	2.94397	Il10rb	2.8625	Klf11	1.71918	Ptges	1.48866
Actr10	Tmc6	Armc7	Ttc32	Sept9	Map3k3		1810043H04Rik	1.41363	Elfn2	6.2741	Kif19a	1.27233	9330161L09Rik	-1.03322	Ldhd	2.82884	Cdca7	1.58295
Arid4a	Syngr2	Nt5c	Osr1	Tnrc6c	Limd2		Nfe2l2	4.13851	Pecr	1.55287	Zfp560	4.13818	Tbccd1	3.48137	Casp12	0.904692	Chac1	2.07991
Tomm20l	Cyth1	Gga3	Rdh14	Tmc6	Ccdc47		Fah	3.95601	Vwf	4.72548	2410004B18Rik	4.09789	Paox	0.819534	Pf4	-0.036407	Plscr2	1.4391
Timm9	Cep295nl	Mrps7	Kcns3	Syngr2	Ddx42		Pdzd2	6.55042	Tpgs1	0.985817	Adam8	2.22597	Cox17	3.65296	Pdia4	5.67837	Clic5	3.17967
Dact1	Timp2	Mif4gd	Smc6	Cyth1	Ftsj3		Chrm4	3.26304	Midn	2.17737	Trp53inp2	6.88697	Gcgr	-0.401072	Mitf	4.82073	Ttll12	3.56185
Daam1	Lgals3bp	Slc25a19	Mycn	Usp36	Psmc5		Casc1	1.5959	Omd	-0.496109	Ptk7	3.07887	Tpm3-rs7	1.32406	Slc29a4	4.00681	Acad10	1.94439
Gpr135	Cant1	Grb2	Nbas	Cep295nl	Smarcd2		Fam189a2	2.19454	Prrt1	5.30331	Armcx6	1.63964	Pdia6	6.92514	Zfp551	3.5625	Acot2	2.63644
Jkamp	Engase	Caskin2	Lratd1	Timp2	Prr29		Car15	0.72036	Dnah11	4.10747	Elfn2	6.39201	Gm12216	0.705311	Derl2	5.42334	Gm5087	0.739043
Rtn1	Rbfox3	Tsen54	Trib2	Lgals3bp	Icam2		Vax1	-0.664027	Naa10	3.05962	Pecr	1.91165	Grk6	3.17299	Bche	3.11685	Tmem132c	1.97948
Pcnx4	Cbx8	Llgl2	Lpin1	Engase	Pecam1		Palm2	4.71602	C4b	2.07225	Vwf	4.02815	Emp3	-0.060693	Upf3a	3.53485	Ppfibp1	5.34408
Ppm1a	Cbx4	Smim5	Ntsr2	Rbfox3	Cep95		Bglap3	-0.303129	Stx4a	3.93832	Tpgs1	2.55176	Rsph3b	1.94377	Prkcd	4.96583	1700007B14Rik	0.469638
Hif1a	Tbc1d16	Smim6	Rock2	Cbx2	Smurf2		Ggct	3.55491	Ndufaf2	1.38744	Midn	3.17666	Cidea	1.86615	Gm6563	4.29199	Gm14410	4.15216
Snapc1	Gaa	Sap30bp	Slc66a3	Cbx4	1810010H24Rik		Cyp4f14	2.21327	Aasdhppt	-0.342854	Omd	1.58887	Fam167a	1.78411	Slc35a4	4.30841	Plekhn1	2.61428
Dbpht2	Eif4a3	Galk1	Kcnf1	Tbc1d16	Bptf		Tmem107	1.90317	Bcorl1	4.96821	Prrt1	5.52526	Emx2	4.71598	Fam101b	3.55334	Il4ra	2.63644
Ppp2r5e	Endov	H3f3b	Nol10	Gaa	Pitpnc1		3110021N24Rik	0.72036	Tpst2	3.51559	Dnah11	3.81275	Tjap1	3.23605	Aar2	4.66365	Rnaseh2a	3.17967
Sgpp1	Nptx1	Unk	Odc1	Endov	Psmd12		Pnn	5.84234	Cwc25	3.89274	Naa10	2.99361	Fam50a	4.13888	Zfhx2	6.4519	Zfp335	5.15365
Esr2	Rptor	Wbp2	Hpcal1	Nptx1	Cacng1		Nipal4	1.67907	Top2a	2.86878	C4b	3.00333	Daxx	3.57379	Hexim2	2.14203	Acot1	2.8411
Mthfd1	Chmp6	Mrpl38	Gm9222	Rptor	Cacng5		Abcc10	3.02946	Zc3h13	6.64899	Stx4a	4.01859	Prkcq	4.17688	Acacb	3.1415	Upf3b	4.93867
Akap5	Baiap2	Fbf1	Asap2	Chmp6	Prkca		Gabpb1	2.82553	Dio2	6.7017	Ndufaf2	1.86973	Irf2bp2	6.54302	Rpl10-ps3	-1.14627	Soga1	6.00699
Zbtb1	Aatk	Srp68	Itgb1bp1	Baiap2	Cep112		Ttc23	2.3034	Rims4	4.19144	Aasdhppt	-0.140795	Rpl23	3.90662	BC031181	-0.925363	Scd1	7.98189
Hspa2	Cep131	Galr2	Cpsf3	Aatk	Axin2		Pcdhb2	2.0562	Luzp1	6.90191	Bcorl1	4.90167	Kdelc2	3.69097	Uxt	2.61664	Hdac4	5.46663
Sptb	Tepsin	Foxj1	Iah1	Cep131	Rgs9		Gse1	6.59661	Rbm17	4.74699	Tpst2	3.58559	Pafah1b3	1.43574	Spef2	3.61626	N4bp2	5.29269
Gpx2	Ndufaf8	Rnf157	Ywhaq	Ndufaf8	Gna13		Gdf11	3.98354	Elmo3	0.985817	Cwc25	4.06576	Hist1h2bc	4.5645	Htatsf1	6.08176	Apip	3.26748
Rab15	Bahcc1	Prpsap1	Grhl1	Bahcc1	Amz2		Klf2	2.72474	Swsap1	2.1518	Top2a	1.95238	Slc46a1	2.2182	Taf5	3.70989	Zfp786	1.87153
Fntb	Actg1	Sphk1	Cys1	Faap100	Arsg		4931406C07Rik	4.26504	Rrp36	2.75451	Zc3h13	6.59378	Zc3h3	4.41353	Erh	0.904692	Ky	1.83367
Max	Faap100	Ube2o	Mboat2	Nploc4	Wipi1		Wdr4	3.51018	Srek1ip1	4.01832	Dio2	6.2684	Utp14a	5.16268	Agfg1	3.69331	Carns1	2.80242
Pals1	Nploc4	Cygb	Kidins220	Ccdc137	Prkar1a		Myo5c	2.21327	Wdr16	1.55287	Rims4	4.39248	Aldh2	5.97473	Gm9934	0.262249	Wfdc2	-0.293092
Atp6v1d	Ccdc137	St6galnac2	Id2	Hgs	Fam20a		Ammecr1l	5.60776	Mgme1	2.66697	Luzp1	6.55876	Mtfmt	3.84051	Ddx27	4.4777	Dnajc3	6.72805
Tmem229b	Hgs	Mxra7	Sox11	Mcrip1	Abca8b		Crtc2	3.95601	Acbd6	3.86939	Rbm17	4.68008	Aard	1.16029	Caskin2	3.87335	Timeless	1.71375
Plekhh1	Mrpl12	Jmjd6	Adi1	P4hb	Abca5		Trim67	2.23175	Sytl5	2.70263	Elmo3	0.234371	Gm20695	-0.847396	Mpst	2.34671	Sncg	1.7948
Pigh	Mcrip1	Mgat5b	Trappc12	Arhgdia	Map2k6		Tfeb	2.13687	Loxl3	1.59142	Swsap1	3.04159	Nfkbie	1.53939	Uhrf1bp1	4.86211	Slc2a10	-0.293092
Vti1b	P4hb	Sec14l1	Eipr1	Anapc11	Kcnj16		Golm1	6.15111	Snrnp40	3.69448	Rrp36	2.38322	Des	1.81198	2010109A12Rik	-0.733835	Col17a1	0.469638
Rdh12	Arhgdia	Sept9	Myt1l	Npb	Kcnj2		A330021E22Rik	4.98203	Hist2h2aa2	-0.862263	Srek1ip1	4.16442	Ubxn11	2.0875	Polr2k	3.37771	Sart1	5.48811
Zfyve26	Alyref	Tnrc6c	Pxdn	Pcyt2	Sox9		Hfe	2.51438	Zfp583	3.5841	Wdr16	1.8483	Ccdc138	3.46391	Mfap1a	4.96583	Ptp4a1	6.45482
Zfp36l1	Npb	Tmc6	Acp1	Mafg	Sstr2		Znfx1	5.71182	Arhgap23	6.69397	Plin5	-0.532158	1110034G24Rik	2.33803	Prr5	2.11739	Phyh	6.10559
Actn1	Pcyt2	Syngr2	Lamb1	Aspscr1	Cog1		Zfp462	6.94634	Gfra2	4.73842	Mgme1	2.25882	Gm14420	4.5145	Jhdm1d	8.50804	Thap2	0.65471
Dcaf5	Mafg	Pgs1	Dld	Cenpx	Slc39a11		Neil2	-0.807626	Klhl38	-0.204327	Gm9805	-2.27477	Folh1	4.09985	Mphosph10	4.59837	mt-Nd4	11.4361
Exd2	Aspscr1	Cyth1	Cbll1	Lrrc45	Fam104a		Csad	3.51773	Noc4l	2.49461	Acbd6	4.21133	Cep110	5.27956	Xkr8	2.46862	Oxa1l	4.42463
Galnt16	Cenpx	Usp36	Gpr22	Rfng	Cpsf4l		Gpaa1	3.16065	1810043H04Rik	0.926736	Sytl5	3.08804	P4ha1	6.24768	Ptges	2.0668	4930447C04Rik	4.48693
Erh	Lrrc45	Cep295nl	Prkar2b	Dus1l	Cdc42ep4		Plk5	2.57354	Nfe2l2	4.01122	Loxl3	2.20926	Fancf	1.07086	Cdca7	2.04082	Atf6b	5.27161
Ccdc177	Rac3	Timp2	Ccdc71l	Fasn	Dnaic2		Rabepk	3.79133	Fah	3.6856	Snrnp40	3.82925	Zbtb7b	2.98994	Chac1	1.5079	Parp9	2.80242
Susd6	Rfng	Lgals3bp	Atxn7l1	Ccdc57	Kif19a		Polr3gl	3.34173	Pdzd2	6.91717	Hist2h2aa2	0.166739	Slc7a2	6.23229	Plscr2	2.42912	AK010878	3.53851
Srsf5	Dus1l	Engase	Twist1	Csnk1d	Btbd17		Cldn25	-0.104575	Chrm4	2.93024	Tcfl5	-0.140795	Tsc22d3	5.953	Clic5	3.69331	Rdm1	1.03432
Smoc1	Fasn	Rbfox3	Hdac9	Ogfod3	Slc9a3r1		Taok3	5.68692	Casc1	1.43061	Zfp583	3.4781	Gm10094	2.67796	Ttll12	2.82884	Tspan18	4.16746
Slc8a3	Ccdc57	Cbx2	Snx13	Cybc1	Nat9		Lurap1l	4.67608	Fam189a2	1.92907	Arhgap23	6.27142	Pabpc5	2.8889	Acad10	2.34671	Mavs	2.65826
Synj2bp	Csnk1d	Cbx8	Tspan13	Foxk2	Grin2c		Arid4a	6.1692	Car15	1.1498	Gfra2	4.64011	Rhoc	2.41273	Acot2	3.04025	Chpt1	6.55127
Ttc9	Ogfod3	Cbx4	Bzw2	Wdr45b	Fdxr		Zdhhc23	4.19141	Vax1	-1.35416	Klhl38	-0.532158	Id1	2.90192	Gpr151	-0.151482	Lypla1	5.52718
Map3k9	Cybc1	Tbc1d16	Sostdc1	Rab40b	Mrpl58		Gm10704	1.78299	Palm2	5.03965	Noc4l	3.051	Irs2	5.44885	Tmem132c	1.65214	Arid5b	5.72367
Pcnx1	Foxk2	Gaa	Dgkb	Fn3krp	Kctd2		Zfp563	4.15797	Bglap3	-0.077944	1810043H04Rik	1.42486	Disp1	2.35707	Ppfibp1	5.6972	Dach2	1.71375
Sipa1l1	Wdr45b	Eif4a3	Etv1	Fn3k	Nt5c		Cyb5	5.02505	Ggct	3.72947	Nfe2l2	4.24041	Mfsd2a	4.03039	1700007B14Rik	-0.276538	Tsen54	1.2793
Rgs6	Rab40b	Endov	Arl4a	Tbcd	Jpt1		Necap2	3.70797	Cyp4f14	2.01667	Fah	4.06112	Sox1	4.40441	Gm14410	4.3407	Uvssa	0.965968
Dpf3	Fn3krp	Nptx1	Ifrd1	Rab10	Sumo2		Erbb3	4.31357	Tmem107	1.66557	Pdzd2	6.34689	Mfsd12	3.85398	Plekhn1	2.14203	Kcnj8	1.67146
Dcaf4	Fn3k	Rptor	Dock4	Kif3c	Gga3		Zic3	2.83765	3110021N24Rik	1.59142	Chrm4	3.69166	Chka	6.60307	Il4ra	2.09232	Serpinb1b	2.39788
Zfyve1	Tbcd	Chmp6	Immp2l	Asxl2	Mrps7		Rhod	-0.303129	Pnn	5.68166	Casc1	1.48163	Tatdn1	-0.401072	Rnaseh2a	2.82884	Slfnl1	-0.134605
Rbm25	Rab10	Baiap2	Lrrn3	Dtnb	Mif4gd		Bmp5	1.62416	Nipal4	1.38744	Fam189a2	2.17525	Dcp1a	3.74256	Zfp335	4.83969	Agtr2	0.367364
Psen1	Kif3c	Aatk	Pnpla8	Dnmt3a	Slc25a19		Flt1	6.47969	Abcc10	2.853	Car15	0.822948	Llph	3.96983	Acot1	2.79816	Fam122a	2.61428
Papln	Asxl2	Cep131	Nrcam	Pomc	Grb2		Stat2	4.69286	Grb7	0.245858	Vax1	-0.140795	Krcc1	4.49315	Upf3b	5.18029	Dad1	4.93867
Riox1	Dtnb	Ndufaf8	Nova1	Dnajc27	Tmem94		Ormdl2	1.65187	E130114P18Rik	-0.342854	Palm2	4.56329	Gm5506	2.76607	Soga1	5.80723	Pifo	1.22185
Acot2	Dnmt3a	Slc38a10	Foxg1	Adcy3	Caskin2		Cspp1	6.4563	Gabpb1	2.7881	Ggct	3.28429	Iqce	5.80486	Scd1	7.75719	Zfp599	2.8411
Acot1	Efr3b	Bahcc1	Prkd1	Ptrhd1	Smim5		Dnaaf3	1.04694	Ttc23	2.63041	Cyp4f14	2.39805	Zfp444	3.91307	Hdac4	5.72602	Tmod4	-0.471164
Acot4	Dnajc27	Actg1	G2e3	Itsn2	Smim6		Kcna5	0.72036	Pcdhb2	1.89865	Tmem107	2.03056	Crcp	2.95288	N4bp2	5.66356	Pthlh	0.008183
Pnma1	Adcy3	Faap100	Ap4s1	Fam228b	Sap30bp		Spire2	2.45268	Gse1	6.81905	3110021N24Rik	0.988787	Kif23	1.60457	Apip	2.91716	Fam189b	4.25599
Mideas	Ptrhd1	Ccdc137	Strn3	Pfn4	Itgb4		Myc	1.78299	Gdf11	4.30018	Pnn	5.74841	Hes1	3.20487	Zfp786	1.90344	Bola2	2.01374
Fam161b	Itsn2	Arl16	Hectd1	Fkbp1b	Galk1		Smarca4	7.11699	Klf2	2.25147	Nipal4	1.73612	Pin1	4.7738	Ky	2.48798	Morc2b	4.20501
Bbof1	Pfn4	Hgs	Akap6	Wdcp	Mrpl38		Eif3a	7.45209	4931406C07Rik	4.57488	Abcc10	3.16804	Ears2	2.8356	Carns1	2.61664	Gab2	4.93867
Rnf113a2	Fkbp1b	Mrpl12	Npas3	Ubxn2a	Fbf1		Mtmr2	1.94857	Wdr4	3.59363	Grb7	0.166739	Wbp1l	5.22619	Wfdc2	-0.276538	Cpm	4.84664
Npc2	Ubxn2a	Slc25a10	Egln3	Atad2b	Ten1		Gm17482	0.494079	Myo5c	2.7881	Gabpb1	2.59099	Ovgp1	2.31874	Dnajc3	6.59153	Klhdc7a	4.72267
Ylpm1	Atad2b	Mcrip1	Sptssa	Klhl29	Srp68		Ndufa13	4.50808	Ammecr1l	5.3434	Ttc23	2.08653	Mterf	2.27936	Timeless	1.3894	Gpr115	1.38778
Dlst	Klhl29	P4hb	Eapp	Hs1bp3	Galr2		Diras1	4.79892	Crtc2	3.69448	Pcdhb2	2.19236	Sh3bp1	3.74256	Sncg	0.961179	Capn3	3.76659
Rps6kl1	Ldah	Arhgdia	Srp54a	Rhob	Exoc7		Supt7l	3.96156	Trim67	1.47252	Gse1	6.4465	Gm14393	2.78025	Slc2a10	1.3894	Man2a1	5.08683
Eif2b2	Hs1bp3	Alyref	Fam177a	Pum2	Foxj1		Kri1	4.29171	Etfb	-0.496109	Gdf11	3.98462	Traip	5.12152	Sart1	5.01001	Itgb3	2.1119
Tmed10	Rhob	Anapc11	Srp54c	Laptm4a	Rnf157		Mif4gd	1.83227	Tfeb	2.7881	Klf2	2.8063	Bdh2	0.64462	Ptp4a1	6.12721	Kl	7.57038
Jdp2	Pum2	Npb	Fam177a2	Osr1	Sphk1		Hmg20b	2.57354	Golm1	6.48076	4931406C07Rik	4.08879	Spsb1	4.41353	Phyh	6.01328	Klhl26	0.469638
Erg28	Laptm4a	Pcyt2	Srp54b	Rdh14	Cygb		Rfx1	3.70135	A330021E22Rik	5.16317	Wdr4	3.59848	Fhit	1.63609	mt-Nd4	11.0974	Pomt1	4.02356
Ttll5	Wdr35	Sirt7	Prorp	Smc6	Jmjd6		Casp6	1.5959	Hfe	2.43226	Myo5c	1.2065	Mt2	6.03952	Oxa1l	4.31384	Rhobtb1	2.17381
Gpatch2l	Rdh14	Mafg	Insm2	Mycn	Mgat5b		Phactr2	6.1918	Znfx1	5.78299	Ammecr1l	5.6924	Fam20a	3.54086	4930447C04Rik	4.39297	Gpr17	5.86877
Vash1	Smc6	Pycr1	Ralgapa1	Ddx1	Sec14l1		Elovl7	5.32963	Zfp462	7.09205	Crtc2	4.16875	Slc31a2	3.22573	Atf6b	5.07864	Rab39	1.62789
Irf2bpl	Vsnl1	Aspscr1	Brms1l	Lratd1	Sept9		Rrp8	2.80098	Csad	3.3568	Trim67	2.73804	Ddit3	3.18369	Parp9	3.29223	Hcfc1r1	5.16893
Cipc	Fam49a	Cenpx	Mbip	Trib2	Tmc6		Trmt44	2.89676	Gpaa1	2.57377	Tfeb	1.82655	Ttll3	4.12784	AK010878	3.49714	Gnl3	4.46852
Zdhhc22	Mycn	Lrrc45	Mipol1	Ntsr2	Pgs1		Gm10132	-0.664027	Plk5	2.97466	Golm1	5.89928	Slc16a12	3.43732	Rdm1	1.06792	Smtnl2	0.138102
Gstz1	Ddx1	Gps1	Sec23a	E2f6	Dnah17		Zfp59	2.68505	Rabepk	3.81341	A330021E22Rik	4.8648	Apold1	2.7373	Tspan18	4.51591	Stab1	4.28433
Tmed8	Lratd1	Dus1l	Trappc6b	Rock2	Cyth1		Arpc3	5.84384	Polr3gl	3.03185	Hfe	2.48391	Csf2rb2	1.69713	Mavs	2.84394	Igfbp2	5.12651
Ahsa1	Trib2	Fasn	Pnn	Kcnf1	Usp36		Crip3	0.66703	Cldn25	0.662767	Znfx1	5.64193	Alpk1	3.71331	Chpt1	6.71267	Rgp1	5.46972
Sptlc2	Ntsr2	Ccdc57	Mia2	Nol10	Cep295nl		Specc1	7.13552	Taok3	5.73859	Zfp462	6.77432	Disc1	2.11012	Lypla1	5.1411	Sema4a	4.43731
Nrp	Rock2	Ogfod3	Fbxo33	Hpcal1	Timp2		Dbndd2	5.89548	Lurap1l	4.89303	Csad	3.59205	Zfp882	4.36263	Arid5b	5.52521	Prrg1	4.37278
Nrxn3	Kcnf1	Cybc1	Togaram1	Asap2	Lgals3bp		Manf	4.69619	Arid4a	6.39754	Gpaa1	3.51935	Ccs	3.7059	Gm10642	-0.564779	Fam57b	4.69126
Dio2	Hpcal1	Narf	Prpf39	Itgb1bp1	Engase		Myl1	-0.664027	Pou6f2	0.733423	Plk5	2.42724	Col9a3	4.70488	Dach2	1.21455	Fam114a1	2.78269
Gtf2a1	Asap2	Foxk2	Mdga2	Cpsf3	Rbfox3		Nos1ap	5.42105	Zdhhc23	4.14035	Rabepk	3.89864	1700109H08Rik	3.58997	Tsen54	1.95997	Pkib	2.96883
Ston2	Itgb1bp1	Wdr45b	Rps29	Ywhaq	Cbx2		Cd63	4.92921	Gm10704	2.38914	Polr3gl	3.4781	Hcrtr1	0.581262	Uvssa	0.904692	Ntn4	2.93348
Sel1l	Cpsf3	Rab40b	Rpl36al	Cys1	Cbx4		Pggt1b	4.4813	Casc5	1.2496	Cldn25	0.477048	Zfp330	4.47147	Kcnj8	0.845903	Nr4a1	5.5331
Kcnk10	Ywhaq	Fn3k	Mgat2	Mboat2	Gaa		Elk4	5.71839	Zfp563	4.11411	Taok3	5.60886	Srrm3	5.5516	Serpinb1b	0.845903	Mrps28	1.4391
Spata7	Cys1	Tbcd	Klhdc2	Kidins220	Eif4a3		Pde3b	4.98475	Cyb5	4.59874	Lurap1l	4.45406	Gas2l1	5.05312	Agtr2	1.06792	Serhl	2.39788
Ptpn21	Mboat2	Rab10	Nemf	Id2	Endov		Oplah	3.68132	Necap2	3.45415	Arid4a	6.06402	Ppap2c	0.763553	Fam122a	2.52592	Col4a5	3.96348
Ttc8	Kidins220	Kif3c	Arf6	Sox11	Nptx1		Dpf1	4.63154	Erbb3	4.63148	Pou6f2	0.635538	Ccdc19	1.72671	Dad1	4.41336	Cyp4f13	3.5267
Tdp1	Id2	Asxl2	Vcpkmt	Rnaseh1	Rptor		Htra4	1.0881	Zic3	1.89865	Zdhhc23	4.34737	A430033K04Rik	4.896	Pifo	1.16731	1700026L06Rik	-0.910921
Kcnk13	Rnf144a	Dtnb	Sos2	Adi1	Chmp6		BC053749	1.31307	Rhod	-0.496109	Gm10704	1.42486	Slc15a4	4.31474	Zfp599	3.17771	Rprd1a	7.39303
Calm1	Sox11	Dnmt3a	Atl1	Trappc12	Baiap2		Snrnp48	4.26055	Bmp5	2.04473	Zfp563	4.13818	St7l	3.08437	Fam189b	3.59856	Tango2	4.26313
Ttc7b	Rnaseh1	Pomc	Sav1	Eipr1	Aatk		Vps37c	3.16065	Flt1	6.49609	Cyb5	5.14295	Atn1	6.36401	Bola2	1.58182	Cacna2d4	1.4391
Rps6ka5	Adi1	Efr3b	Nin	Myt1l	Cep131		Cdc37l1	5.36145	Stat2	4.95718	Necap2	3.77918	Tnfrsf11b	1.02397	Morc2b	4.60724	Zfp217	2.63644
Gpr68	Trappc12	Dnajc27	Trim9	Pxdn	Tepsin		Kdm5c	6.35666	Ormdl2	1.95887	Erbb3	4.1902	Tgif1	0.975515	Gab2	4.82073	Psmb8	1.162
Slc24a4	Eipr1	Adcy3	Tmx1	Sh3yl1	Ndufaf8		Ttyh3	6.02299	Cspp1	6.60491	Zic3	2.73804	Stbd1	0.873423	Cpm	4.73017	Zc3h18	5.22849
Rin3	Myt1l	Ptrhd1	Actr10	Lamb1	Bahcc1		Gm12353	0.66703	Dnaaf3	0.427311	Rhod	-0.140795	Chpf	4.76314	Klhdc7a	4.32465	Tagln2	1.83367
Lgmn	Pxdn	Ncoa1	Psma3	Dld	Actg1		Ivns1abp	2.13687	Kcna5	0.926736	Bmp5	1.7126	Anks1	4.7738	Gpr115	1.75157	Fst	1.62789
Golga5	Sh3yl1	Itsn2	Arid4a	Cbll1	Faap100		Shh	-0.413692	Spire2	2.49461	Flt1	6.4465	Akap1	0.975515	Capn3	3.32488	Lrrc38	-0.471164
Chga	Dld	Pfn4	Tomm20l	Bcap29	Nploc4		Tmem74b	0.297535	Myc	1.86757	Stat2	4.69215	Scube3	1.47112	Man2a1	5.19509	Trim21	1.58295
Ubr7	Cbll1	Fkbp1b	Timm9	Gpr22	Ccdc137		Cox11	3.56951	Smarca4	7.09373	Ormdl2	1.63964	4931440F15Rik	2.43081	Itgb3	0.904692	Homer1	8.5267
Prima1	Bcap29	Ubxn2a	Dact1	Hbp1	Mrpl12		Wdr90	3.77881	Eif3a	7.47309	Cspp1	6.29537	Tarbp2	2.66274	Kl	7.06893	Prelp	5.48811
Ddx24	Hbp1	Atad2b	Daam1	Prkar2b	Mcrip1		Engase	2.3034	Mtmr2	2.49461	Dnaaf3	0.420097	Fgd3	3.15134	Klhl26	0.349481	Kdelr3	1.09957
Ppp4r4	Prkar2b	Klhl29	Gpr135	Ccdc71l	P4hb		Gtf2f1	4.75807	Gm17482	1.09718	Kcna5	0.477048	Racgap1	2.55143	Pomt1	4.22436	Rabl3	3.05361
Serpina10	Ccdc71l	Ldah	Jkamp	Sypl	Arhgdia		Ralbp1	5.75399	Ndufa13	4.32327	Spire2	2.79514	Cbx2	1.94377	Rhobtb1	1.5079	Phc1	1.48866
Serpina3n	Sypl	Hs1bp3	Rtn1	Atxn7l1	Alyref		Mmp15	3.35021	Diras1	4.45978	Myc	1.27233	Zbtb2	4.29513	Gpr17	5.71374	Rnh1	3.88236
Dicer1	Atxn7l1	Rhob	Pcnx4	Twistnb	Npb		Nt5c1a	2.01411	Slc5a10	-0.496109	Smarca4	7.14651	Abcb4	4.07707	Rab39	1.3894	Pnkp	4.01513
Glrx5	Twistnb	Pum2	Dhrs7	Hdac9	Pcyt2		Zcchc17	4.79271	Supt7l	3.44365	Oprk1	1.27233	Morn2	-1.49704	Hcfc1r1	3.63374	Col4a6	2.07991
D430019H16Rik	Snx13	Osr1	Ppm1a	Bzw2	Sirt7		Syt12	4.50428	Kri1	4.30599	Eif3a	7.41002	Msto1	3.1622	Gnl3	4.68477	Aasdh	2.04721
Atg2b	Bzw2	Rdh14	Hif1a	Ankmy2	Mafg		Thg1l	3.00817	Mif4gd	1.86757	Mtmr2	1.61448	Gimap6	2.33803	Smtnl2	1.34763	Trp53inp1	5.61349
Papola	Sostdc1	Kcns3	Snapc1	Sostdc1	Notum		D8Ertd82e	4.5602	Hmg20b	2.04473	Gm17482	0.477048	Col13a1	1.47112	Stab1	3.93811	Setd8	5.50326
Vrk1	Dgkb	Smc6	Dbpht2	Crppa	Aspscr1		Ccar1	6.08784	Rfx1	3.66767	Ndufa13	4.76257	Fxyd5	3.32577	Igfbp2	4.17744	Hhip	3.79641
Bcl11b	Etv1	Vsnl1	Kcnh5	Dgkb	Rac3		Fbrs	4.39372	Casp6	1.20056	Diras1	4.89385	Masp1	2.87576	Rgp1	5.27525	R3hcc1l	5.20274
Setd3	Arl4a	Rad51ap2	Ppp2r5e	Etv1	Rfng		Pld2	4.04231	Phactr2	6.2637	Supt7l	4.01378	Anxa2	3.22573	B4galnt3	1.01554	Mdfic	4.1367
Ccnk	Ifrd1	Fam49a	Sgpp1	Arl4a	Gps1		Tekt4	-0.413692	Elovl7	5.56784	Kri1	4.44695	Gm9881	0.763553	Sema4a	4.22436	Ltbr	2.26196
Ccdc85c	Dock4	Mycn	Esr2	Ifrd1	Dus1l		Fam96b	2.54426	Rrp8	3.19096	Mif4gd	1.63964	Smim3	3.50717	Prrg1	4.4032	Chgb	8.29038
Cyp46a1	Immp2l	Ddx1	Mthfd1	Dock4	Fasn		Taf3	4.27844	Trmt44	3.3568	Hmg20b	2.97396	Dnase1l2	2.2182	Gm10778	1.16731	Mrpl40	3.46612
Eml1	Lrrn3	Lratd1	Akap5	Lrrn3	Ccdc57		Cables1	3.88188	Gm10132	-0.862263	Rfx1	3.5791	Klf11	1.81198	Fam57b	4.28647	Chchd10	5.02098
Evl	Dnajb9	Trib2	Zbtb25	Dnajb9	Csnk1d		Znhit6	3.55491	Zfp59	2.51481	Casp6	2.04946	Ldhd	2.33803	Fam114a1	2.28166	Epha8	0.138102
Yy1	Nrcam	Ntsr2	Zbtb1	Nrcam	Hexdc		Flywch2	1.5959	Arpc3	5.68834	Phactr2	5.99379	Casp12	1.2445	Pkib	4.0334	Map3k13	5.63566
Slc25a47	Nova1	E2f6	Hspa2	Nova1	Ogfod3		Sap30	2.0562	Crip3	0.865132	Elovl7	5.08	5730559C18Rik	0.2957	Ntn4	2.81358	Pyroxd2	1.71375
Wars1	Foxg1	Rock2	Sptb	Foxg1	Cybc1		Lyn	3.2809	Specc1	7.33791	Rrp8	2.81737	Pdia4	6.23616	Nr4a1	4.54392	Trim12a	2.49808
Begain	Prkd1	Pqlc3	Churc1	Prkd1	Foxk2		Frem1	1.50764	Dbndd2	6.1178	Trmt44	2.88206	Mitf	4.56859	Mrps28	0.904692	Pdlim3	0.138102
Dio3	G2e3	Kcnf1	Gpx2	G2e3	Wdr45b		Klhl14	0.149854	Manf	4.594	Gm10132	-0.776528	Slc29a4	4.62073	Serhl	2.34671	Plk3	2.54569
Ppp2r5c	Strn3	Hpcal1	Rab15	Strn3	Rab40b		Odf3b	0.225584	Myl1	-0.496109	Zfp59	2.74964	Zfp551	3.07289	Col4a5	3.6424	Adipor2	6.42648
Dync1h1	Hectd1	Asap2	Fntb	Hectd1	Fn3krp		Shroom4	4.33082	Nos1ap	5.53854	Arpc3	6.00594	Derl2	5.63586	Cyp4f13	2.75087	Zfp821	3.91898
1700001K19Rik	Dtd2	Itgb1bp1	Max	Dtd2	Fn3k		Macrod1	1.20496	Cd63	4.86183	Crip3	0.166739	Bche	4.5969	1700026L06Rik	-1.14627	3100002H09Rik	0.367364
Hsp90aa1	Akap6	Cpsf3	Fut8	Akap6	Tbcd		Hsph1	8.17529	Pggt1b	4.4907	Specc1	6.99815	Upf3a	4.3196	Rprd1a	7.4457	0610010F05Rik	0.739043
Zfp839	Npas3	Ywhaq	Gphn	Npas3	Zfp750		Plekhh3	1.70576	Elk4	5.77882	Dbndd2	5.63725	Prkcd	3.89364	Tango2	4.15945	Prodh	4.24882
Tecpr2	Sptssa	9030624G23Rik	Pals1	Sptssa	Rab10		Mthfd2	2.37166	Pde3b	5.13409	Manf	4.77964	Gm6563	4.05974	Cacna2d4	1.46947	Mbd6	4.7934
Ankrd9	Srp54a	Grhl1	Atp6v1d	Snx6	Kif3c		Atxn7	5.99215	Oplah	3.71208	Nos1ap	5.23043	Slc35a4	4.37669	Zfp217	2.30367	Eva1a	2.72182
Rcor1	Fam177a	Cys1	Tmem229b	Srp54a	Asxl2		Ercc2	3.78509	Dpf1	4.42818	Cd63	4.82148	Fam101b	3.69845	Psmb8	-0.564779	Myrf	6.03019
Amn	Srp54b	Mboat2	Plekhh1	1700047I17Rik2	Dtnb		Pdap1	4.9035	Htra4	0.926736	Dand5	-0.776528	Aar2	4.82598	Zc3h18	5.21265	Sh3rf3	5.20645
Cdc42bpb	Srp54c	Kidins220	Vti1b	Fam177a	Dnmt3a		Net1	5.22741	BC053749	1.47252	Pggt1b	4.61496	Zfhx2	6.67691	Tagln2	1.95997	Slc17a8	2.42359
Ckb	Prorp	Id2	Rdh12	Srp54b	Efr3b		Spen	7.0113	Snrnp48	4.23471	Elk4	5.61363	Hexim2	2.50097	Fst	0.845903	Fv1	2.29019
Trmt61a	Nfkbia	Sox11	Zfyve26	Srp54c	Dnajc27		Mfsd7c	1.73196	Vps37c	3.22813	Pde3b	4.81044	Acacb	3.09574	Lrrc38	-0.413472	Mob3c	2.61428
Bag5	Ralgapa1	Rnaseh1	Zfp36l1	Prorp	Ptrhd1		Tbc1d2	2.83765	Cdc37l1	5.52864	Oplah	3.99928	Rpl10-ps3	-0.401072	Trim21	2.32535	Mcts2	3.57338
Klc1	Mbip	Adi1	Actn1	Nfkbia	Ncoa1		Ankrd63	3.6473	Kdm5c	6.2741	Dpf1	4.70413	BC031181	-0.165477	Homer1	8.69687	Polm	1.83367
Xrcc3	Mipol1	Trappc12	Dcaf5	Ralgapa1	Itsn2		Gamt	2.26802	Ttyh3	6.01873	Htra4	0.822948	Uxt	2.69303	Prelp	4.40829	Nkain1	1.75485
Zfyve21	Sec23a	Eipr1	Exd2	Sec23a	Fam228a		Uprt	3.98899	Gm12353	0.80078	BC053749	1.73612	Spef2	3.75697	Kdelr3	-0.925363	Gm11808	0.138102
Ppp1r13b	Trappc6b	Myt1l	Galnt16	Trappc6b	Mfsd2b		AI467606	-0.413692	Ivns1abp	2.34469	Snrnp48	4.27294	Htatsf1	6.23487	Rabl3	3.17771	Atp5j	6.24371
Atp5mj	Pnn	Pxdn	Erh	Pnn	Ubxn2a		Cacna1h	6.57415	Tmem74b	-0.667601	Vps37c	3.06035	Taf5	3.68345	Phc1	1.01554	Ifitm1	1.2793
Kif26a	Mia2	Tmem18	Ccdc177	Mia2	Atad2b		Adra1d	3.45619	Cox11	3.12678	Cdc37l1	5.25303	Erh	-0.847396	Rnh1	3.4682	Cfp	3.58482
Tmem179	Fbxo33	Sh3yl1	Susd6	Fbxo33	Klhl29		Tnfrsf1b	1.5959	Wdr90	3.59363	Kdm5c	6.36868	Agfg1	4.0828	Pnkp	3.97287	Srrd	3.06998
Adss1	Lrfn5	Lamb1	Srsf5	Lrfn5	Rhob		Myo1e	4.25604	Engase	2.32194	Ttyh3	6.04531	Ddx27	4.65575	Col4a6	2.30367	Ccdc30	4.8275
Siva1	Togaram1	Dld	Slc8a3	Gm527	Pum2		Cdh24	2.58796	Gtf2f1	4.6635	Gm12353	0.420097	Caskin2	4.39983	Aasdh	1.93198	Syde1	2.96883
Akt1	Fkbp3	Cbll1	S2bpcox16	Togaram1	Wdr35		Coa6	2.82553	Ralbp1	5.62935	Ivns1abp	1.992	Mpst	2.78025	Trp53inp1	5.74424	Cdc26	3.33678
Cep170b	Mdga2	Slc26a4	Ttc9	Fkbp3	Ttc32		Pced1a	4.20082	Mmp15	3.6856	Shh	0.021151	Uhrf1bp1	4.7343	Setd8	5.43086	Cars2	2.17381
Ahnak2	Rps29	Bcap29	Map3k9	Mdga2	Rdh14		Mroh1	5.39053	Nt5c1a	1.98806	Tmem74b	0.420097	Polr2k	3.88711	Hhip	3.75852	Dsc2	0.965968
Clba1	Mgat2	Dus4l	Pcnx1	Rps29	Kcns3		Brd7	5.04086	Zcchc17	4.90456	Cox11	3.85096	Axdnd1	1.02397	R3hcc1l	5.08501	Zfp109	3.2388
Nudt14	Klhdc1	Hbp1	Sipa1l1	Rpl36al	Smc6		Sdc4	6.32903	Syt12	4.71242	Wdr90	3.89342	Mfap1a	4.8157	Mdfic	2.87367	Tmem176b	3.96348
Btbd6	Klhdc2	Prkar2b	Dpf3	Mgat2	Vsnl1		Adamtsl1	3.71456	Thg1l	3.10029	Engase	2.53845	Prr5	1.66693	Ltbr	1.46947	Tut1	4.02356
Brf1	Arf6	Ccdc71l	Zfyve1	Klhdc1	Rad51ap2		Tmbim4	3.50259	D8Ertd82e	4.63148	Gtf2f1	4.70114	Jhdm1d	8.33705	Chgb	8.24631	Lars2	4.74323
Tex22	Vcpkmt	Sypl	Rbm25	Klhdc2	Fam49a		Ccdc58	2.58796	Ccar1	6.25771	Ralbp1	5.72803	Mphosph10	4.80534	Mrpl40	2.63412	Gm16503	1.67146
Crip2	Sos2	Cdhr3	Psen1	Arf6	Mycn		Cgn	2.4992	Fbrs	4.02537	Mmp15	3.30016	Xkr8	2.69303	Chchd10	4.60281	Retsat	3.2388
Dync2i1	Atl1	Atxn7l1	Papln	Vcpkmt	Nbas		Zfp930	3.40009	Pld2	4.02537	Nt5c1a	1.86973	Ptges	1.66693	Epha8	1.93198	Haus8	1.67146
Esyt2	Map4k5	Twistnb	Numb	Sos2	Lratd1		Cacna2d2	4.96002	Tekt4	-0.667601	Zcchc17	4.71896	Cdca7	1.20301	Map3k13	5.85459	Peli3	3.65162
Ptprn2	Sav1	Hdac9	Acot2	Atl1	Ntsr2		Bcam	2.83765	Fam96b	2.36708	Syt12	4.32815	Chac1	1.32406	Pyroxd2	0.349481	Fkbp2	4.15983
Rapgef5	Nin	Snx13	Acot1	Map4k5	E2f6		Hsd11b1	4.36889	Taf3	4.31754	Thg1l	3.14186	Plscr2	1.53939	Trim12a	2.70199	Ralb	3.84479
Itgb8	Trim9	Ahr	Pnma1	Sav1	Rock2		Taf12	3.68803	Cables1	4.04634	D8Ertd82e	4.48909	Clic5	4.32927	Plk3	1.87431	Sesn2	3.14918
Gdi2	Tmx1	Bzw2	Mideas	Nin	Pdia6		Nr1h3	0.66703	Znhit6	3.51559	Ccar1	5.99866	Ttll12	3.04968	Adipor2	6.59822	Eif5b	6.62516
Tasor2	Frmd6	Ankmy2	Ptgr2	Trim9	Odc1		Lat2	0.554063	Flywch2	1.47252	Fbrs	4.73947	Acad10	1.78411	Zfp821	3.93106	Sema4f	5.19902
Asb13	Actr10	Sostdc1	Coq6	Tmx1	Hpcal1		Zfp362	4.04754	Sap30	1.55287	Pld2	4.23629	Acot2	3.35448	3100002H09Rik	0.431738	Oca2	2.34504
Net1	Arid4a	Dgkb	Bbof1	Actr10	Asap2		Lmf1	3.13142	Lyn	3.32283	Rbm38	-0.532158	Gm5087	1.81198	0610010F05Rik	1.34763	Ago3	6.19974
Akr1e1	Tomm20l	Etv1	Rnf113a2	Arid4a	Itgb1bp1		Utp3	4.12374	Frem1	2.04473	Tekt4	-0.423924	Tmem132c	2.31874	Prodh	4.08515	Apln	3.90991
Pfkp	Timm9	Arl4a	Aldh6a1	Tomm20l	Ywhaq		Fignl2	0.554063	Shroom4	3.96058	Fam96b	2.32236	Ppfibp1	5.5118	Mbd6	4.18339	Ppil4	5.90116
Wdr37	Dact1	Dock4	Isca2	Timm9	Grhl1		Scel	1.27793	Macrod1	1.59142	Taf3	4.27695	1700007B14Rik	-0.165477	Eva1a	2.93136	BC021891	1.90842
Larp4b	Daam1	Immp2l	Arel1	Dact1	Klf11		E2f1	1.04694	Hsph1	8.05936	Cables1	3.71552	Klc3	0.445535	Myrf	5.63779	Ccnd3	4.23436
Dip2c	Gpr135	Dnajb9	Ylpm1	Daam1	Cys1		Nup43	1.73196	Plekhh3	1.86757	Znhit6	3.63648	Gm14410	4.44056	Sh3rf3	5.52287	Crot	5.43221
Zmynd11	Jkamp	Nrcam	Prox2	Gpr135	Mboat2		Tomm5	3.17027	Mthfd2	2.43226	Flywch2	1.53625	Plekhn1	2.15433	Slc17a8	3.35681	Elovl2	3.78654
Chrm3	Rtn1	Nova1	Dlst	Jkamp	Kidins220		Zfp609	6.65855	Atxn7	6.13258	Sap30	2.24249	Il4ra	1.86615	Fv1	2.2593	Hist3h2a	4.04028
Ryr2	Pcnx4	Foxg1	Rps6kl1	Rtn1	Id2		Ccpg1	4.25152	Ercc2	3.6125	Lyn	3.21901	Rnaseh2a	3.50717	Mob3c	2.0668	Eral1	3.2956
Mtr	Dhrs7	Prkd1	Eif2b2	Pcnx4	Rsad2		Zfp758	5.06167	Pdap1	4.77238	Klhl14	0.635538	Zfp335	5.25185	Mcts2	3.92397	Galnt3	3.06998
Actn2	Ppm1a	G2e3	Nek9	Dhrs7	Cmpk2		Rsrc2	5.72493	Net1	5.57987	Odf3b	0.477048	Acot1	2.23887	Acnat1	-0.733835	Plod2	4.0973
Lgals8	Mnat1	Scfd1	Tmed10	Ppm1a	Sox11		Car12	5.95925	Spen	7.12116	Shroom4	4.4576	Upf3b	5.30429	Polm	1.87431	Park7	1.162
Gpr137b	Hif1a	Strn3	Jdp2	Trmt5	Rnaseh1		Ggnbp1	1.38088	Mfsd7c	1.89865	Macrod1	1.53625	Soga1	5.99311	Nkain1	1.26029	Bcar3	3.78654
Nid1	Snapc1	Hectd1	Erg28	Hif1a	Adi1		Cpt1a	5.26155	Tbc1d2	3.1136	Hsph1	8.26069	Scd1	8.10052	Atp5j	6.01161	Efcab5	3.88236
Gng4	Dbpht2	Heatr5a	Ttll5	Snapc1	Trappc12		Gm10643	1.94857	Ankrd63	3.36795	Plekhh3	1.97233	Hdac4	5.66862	Ifitm1	-0.413472	BC005624	5.14208
B3galnt2	Kcnh5	Dtd2	Tgfb3	Syt16	Eipr1		Fam111a	1.20496	Gamt	2.01667	Mthfd2	2.46995	N4bp2	5.65714	Cfp	3.18957	Lman2	6.25986
Ggps1	Ppp2r5e	Arhgap5	Gpatch2l	Dbpht2	Myt1l		Gm4707	1.94857	Uprt	4.2885	Atxn7	5.93275	Apip	3.41023	Srrd	2.73476	Mppe1	3.19468
Arid4b	Sgpp1	Akap6	Vash1	Kcnh5	Pxdn		Gm11084	-0.807626	Cacna1h	6.78307	Ercc2	3.78483	Zfp786	2.48375	Ccdc30	4.83969	Safb2	5.82603
Hecw1	Mthfd1	Npas3	Irf2bpl	Ppp2r5e	Tmem18		Dusp12	2.07679	Adra1d	4.03939	Pdap1	4.88599	Ky	1.7557	Syde1	2.54453	Prpf3	5.05016
Gli3	Akap5	Egln3	Cipc	Sgpp1	Sh3yl1		Cpq	3.13142	Tnfrsf1b	1.8358	Net1	4.78811	Carns1	1.50566	Cdc26	3.0533	Edem2	4.41184
Mplkip	Zbtb25	Sptssa	Zdhhc22	Syne2	Dld		Tmed5	5.60066	Myo1e	4.08738	Spen	6.96929	Wfdc2	1.16029	Cars2	1.78325	Ppp1r1b	5.33733
Cdk13	Zbtb1	Cfl2	Tmem63c	Mthfd1	Gpr22		Rnf31	4.20082	Cdh24	2.96001	Mfsd7c	1.36577	Dnajc3	6.8304	Dsc2	1.16731	Fam43a	3.02029
Rala	Hspa2	Srp54a	Ngb	Akap5	Hbp1		Dtx3l	3.43241	Coa6	2.51481	Tbc1d2	2.59099	Timeless	1.43574	Zfp109	3.34625	S1pr5	3.6407
Yae1d1	Sptb	1700047I17Rik2	Gstz1	Zbtb25	Pik3cg		Obsl1	3.22664	Pced1a	4.346	Ankrd63	4.17737	Sncg	-0.060693	Tmem176b	3.25881	Cep250	5.36745
Amph	Gpx2	Srp54c	Tmed8	Hspa2	Ccdc71l		Srsf4	5.36145	Mroh1	5.40151	Gamt	2.20926	Slc2a10	0.64462	Tut1	3.888	Bahd1	5.07065
Elmo1	Rab15	Prorp	Ahsa1	Sptb	Sypl		Akap9	7.65017	Brd7	5.01859	Uprt	3.88292	Sart1	5.3992	Lars2	4.3981	Nfic	5.80662
Trim27	Fntb	Nfkbia	Sptlc2	Gpx2	Atxn7l1		Uchl3	4.42217	Sdc4	6.53369	AI467606	0.298973	Ptp4a1	6.56979	Gm16503	2.30367	Enthd2	3.22424
Zscan26	Max	Ralgapa1	Nrp	Fntb	Twistnb		Sntb2	5.48985	Adamtsl1	3.46457	Cacna1h	6.48432	Phyh	7.04152	Retsat	3.55334	Gpr68	3.56185
H2ac13	Gphn	Mbip	Nrxn3	Max	Twist1		Usp45	5.16627	Tmbim4	3.21585	Adra1d	3.44992	Thap2	0.2957	Haus8	2.2593	Kank3	4.20501
H3c10	Mpp5	Sstr1	Dio2	Gphn	Hdac9		Cebpz	0.225584	Ccdc58	2.86878	Tnfrsf1b	1.5092	mt-Nd4	11.6496	Peli3	3.88069	Recql4	0.818717
H2bc14	Atp6v1d	Clec14a	Cep128	Mpp5	Snx13		Cgnl1	4.59274	Cgn	2.66697	Myo1e	4.28095	Oxa1l	4.36733	Fkbp2	4.0334	Sipa1l3	7.52656
H4c11	Tmem229b	Gemin2	Gtf2a1	Atp6v1d	Ahr		Snx12	5.08219	Zfp930	3.41169	Cdh24	2.53845	4930447C04Rik	3.976	Ralb	4.14123	Cdhr3	3.17967
H4c12	Plekhh1	Trappc6b	Ston2	Tmem229b	Tspan13		Ino80d	6.85017	Cacna2d2	4.49579	Coa6	2.90299	Atf6b	5.30184	Sesn2	2.14203	Ppig	6.83849
H2ac15	Vti1b	Pnn	Sel1l	Plekhh1	Ankmy2		BC068281	3.33319	Bcam	2.45334	Pced1a	4.11594	Parp9	3.03793	Eif5b	6.74319	Psmc3ip	1.48866
H1f5	Zfp36l1	Mia2	Galc	Vti1b	Sostdc1		Zcchc8	5.14936	Hsd11b1	4.32327	Mroh1	5.45789	AK010878	3.66064	Sema4f	5.12264	Ace	6.30724
H3c11	Actn1	Fbxo33	Kcnk10	Zfp36l1	Dgkb		Scrt1	4.90925	Taf12	3.86939	Brd7	5.0404	Rdm1	1.32406	Oca2	2.36776	Mrps15	3.79641
H2ac22	Dcaf5	Lrfn5	Spata7	Actn1	Etv1		Slc25a30	2.72474	Nr1h3	-0.204327	Sdc4	6.10185	Tspan18	4.82598	Ago3	6.38637	Mtx1	3.93694
H2ac23	Exd2	Gm527	Ptpn21	Dcaf5	Arl4a		Myo7a	4.90925	Lat2	0.339436	Adamtsl1	4.11145	Mavs	2.92762	Apln	3.59856	Asphd1	2.63644
H2ac12	Galnt16	Mdga2	Zc3h14	Exd2	Lsmem1		Mlxip	5.26604	Zfp362	3.47492	Tmbim4	3.83471	Chpt1	6.89044	Ppil4	5.91482	Myo9b	6.32781
H2ac11	Erh	Rps29	Eml5	Galnt16	Dock4		L3hypdh	0.431493	Lmf1	3.15279	Ccdc58	2.30674	Lypla1	5.97781	BC021891	1.42999	Zmynd8	6.8277
Abt1	Slc39a9	Mgat2	Tdp1	Erh	Immp2l		Zbtb3	1.65187	Utp3	4.06701	Cgn	2.35311	Arid5b	5.5516	Ccnd3	3.94513	0610030E20Rik	4.63734
H4c8	Ccdc177	Klhdc1	Kcnk13	Slc39a9	Dnajb9		Copz2	0.494079	Fignl2	0.145787	Zfp930	3.49198	Tsen54	1.7557	Crot	5.50635	Zfp575	1.22185
H2ac10	Susd6	Klhdc2	Calm1	Ccdc177	Pnpla8		Pes1	4.45006	Scel	1.20056	Cacna2d2	5.27327	Uvssa	1.28483	Elovl2	4.24156	Plin2	2.23317
H3c8	Srsf5	Arf6	Ttc7b	Susd6	Nrcam		Slc5a3	7.30056	E2f1	0.662767	Bcam	3.00333	Kcnj8	1.28483	Hist3h2a	4.36184	Kcnmb1	0.008183
H2bc9	Smoc1	Vcpkmt	Rps6ka5	Srsf5	Nova1		Ubox5	3.44038	Nup43	1.62897	Hsd11b1	4.40721	Serpinb1b	0.581262	Eral1	3.09176	Aldh4a1	3.66246
H3c7	Ttc9	Sos2	Gpr68	Slc8a3	Foxg1		2510039O18Rik	2.73773	Tomm5	2.93024	Taf12	3.60488	Agtr2	0.2957	Galnt3	4.26979	Tnip1	3.55023
H4c6	Map3k9	L2hgdh	Slc24a4	Synj2bp	Prkd1		Fam163a	3.95045	Zfp609	6.6995	Nr1h3	0.908249	Ubash3a	-0.060693	Plod2	3.90249	Clec11a	2.1119
H1f3	Pcnx	Atl1	Rin3	Ttc9	G2e3		Papola	6.45433	Ccpg1	4.37392	Lat2	0.732284	Fam122a	2.69303	Park7	1.61741	Cyp26b1	4.04856
H3c6	Sipa1l1	Sav1	Lgmn	Map3k9	Ap4s1		Pkn3	0.149854	Zfp758	5.03965	Zfp362	4.16875	Dad1	4.71229	Bcar3	3.2475	Ppp1r14a	2.47368
H2ac8	Dpf3	Nin	Golga5	Pcnx	Strn3		Ttbk1	6.13402	Rsrc2	5.88932	Lmf1	3.13303	Pifo	0.925372	Map4k1	0.070164	Ficd	2.98619
H2ac7	Rbm25	Abhd12b	Chga	Sipa1l1	Hectd1		Cep135	4.32222	Car12	6.19181	Utp3	4.27294	Zfp599	3.17299	Efcab5	3.62502	Snx15	4.0973
H3c4	Psen1	Trim9	Itpk1	Rgs6	Heatr5a		Samd14	4.09879	Ggnbp1	1.51326	Fignl2	0.360806	Pthlh	-0.847396	BC005624	5.18919	Pstpip2	3.05361
H4c4	Papln	Tmx1	Gon7	Dpf3	Akap6		Plbd2	5.34669	Cpt1a	5.16956	Scel	1.45352	Fam189b	4.18756	Lman2	6.04793	Rai1	6.29162
H2bc6	Acot4	Actr10	Ubr7	Dcaf4	Npas3		Mcoln1	4.29171	Gm10643	1.73609	E2f1	1.30415	Bola2	3.01413	Mppe1	3.1415	Amer2	5.49722
H1f4	Pnma1	Arid4a	Prima1	Zfyve1	Sptssa		Chmp5	5.36773	Fam111a	1.09718	Nup43	1.8483	Morc2b	4.54388	Safb2	5.72805	Fkbpl	2.20379
H2ac6	Elmsan1	Tomm20l	Otub2	Rbm25	Cfl2		Lysmd3	4.26504	Gm4707	2.01667	Tomm5	3.53285	Gab2	4.925	Chrnb4	0.431738	Paqr9	5.02519
H4c3	Ptgr2	Dact1	Ddx24	Psen1	Srp54a		Nod1	2.32077	Gm11084	-1.35416	Zfp609	6.65445	Cpm	4.25	Prpf3	5.31914	Nr1h4	0.008183
H1f2	Bbof1	Daam1	Ppp4r4	Papln	1700047I17Rik2		Pik3ap1	1.47698	Dusp12	2.41086	Ccpg1	4.34737	Klhdc7a	4.14984	Edem2	4.36707	Zswim4	3.51478
H3c3	Rnf113a2	Gpr135	Serpina10	Acot2	Srp54b		Hsd17b10	3.38366	Cpq	3.34557	Zfp758	5.02854	Gpr115	1.47112	Ppp1r1b	4.55314	Ncor2	7.74433
H2bc3	Aldh6a1	Jkamp	Serpina3n	Acot4	Fam177a		Syne2	6.39714	Tmed5	5.51366	Rsrc2	5.76709	Capn3	3.66064	Fam43a	2.63412	Zcwpw1	2.3717
H2ac4	Syndig1l	Rtn1	Dicer1	Pnma1	Srp54c		Aff1	5.24344	Rnf31	4.25886	Car12	5.74986	Man2a1	5.68566	S1pr5	2.90281	Ddx55	4.7835
H3c2	Npc2	Pcnx4	Glrx5	Elmsan1	Prorp		Myo10	6.11423	Dtx3l	3.70331	Gm5105	-0.649175	Itgb3	1.94377	Cep250	5.29462	Nupl2	3.38992
H4c2	Isca2	Dhrs7	D430019H16Rik	Ptgr2	Psma6		Lor	0.297535	Obsl1	2.70263	Ggnbp1	1.10174	Kl	7.00577	Bahd1	4.99656	Blm	2.95126
H4c1	Fcf1	Ppm1a	Bdkrb1	Fam161b	Nfkbia		Tyrobp	2.43684	Srsf4	5.39335	Cpt1a	5.21586	Klhl26	0.925372	Nfic	5.47032	Mzt2	2.31787
H3c1	Ylpm1	Hif1a	Atg2b	Bbof1	Mbip		Lancl3	3.2809	Akap9	7.75844	Gm10643	1.33529	Pomt1	3.90015	Enthd2	2.81358	Mkl1	5.71849
H1f1	Dlst	Snapc1	Papola	Rnf113a2	Mipol1		Gjc3	5.9758	Uchl3	4.56038	Fam111a	1.27233	Rhobtb1	2.2182	Gpr68	3.82851	Foxk1	6.52479
Scgn	Rps6kl1	Dbpht2	Vrk1	Aldh6a1	Sstr1		Sgsm3	4.62456	Sntb2	5.77673	Gm4707	2.06812	Gpr17	5.48824	Kank3	3.67654	Vars2	4.37937
Carmil1	Pgf	Ppp2r5e	Bcl11b	Npc2	Sec23a		Myh9	7.10137	Usp45	5.36581	Gm11084	-0.532158	Rab39	1.7557	Recql4	1.16731	Sec14l2	5.39371
Ripor2	Mlh3	Sgpp1	Setd3	Fcf1	Trappc6b		Cflar	5.35092	Cebpz	0.038255	Dusp12	2.01141	Hcfc1r1	4.43161	Sipa1l3	7.63664	Sass6	3.55023
Armh2	Nek9	Syne2	Ccnk	Ylpm1	Pnn		Ell	3.71456	Cgnl1	5.05698	Cpq	3.15064	Gnl3	4.75598	Cdhr3	1.87431	Vat1	3.79641
D130043K22Rik	Tmed10	Esr2	Ccdc85c	Prox2	Mia2		Fam161b	3.82215	Snx12	5.02212	Tmed5	5.60567	Smtnl2	0.819534	Ppig	6.66988	Safb	6.77873
Mrs2	Fos	Mthfd1	Eml1	Dlst	Fbxo33		Nfatc2ip	2.91974	Ino80d	7.0019	Rnf31	4.2197	Stab1	3.92588	Ace	5.76223	Dexi	3.47844
Nrsn1	Jdp2	Akap5	Yy1	Rps6kl1	Lrfn5		Fkbp4	5.63579	BC068281	3.1136	Dtx3l	3.33138	Igfbp2	4.66342	Mrps15	3.99333	Kif19a	1.71375
Sox4	Erg28	Zbtb25	Slc25a47	Eif2b2	Togaram1		Dot1l	5.95648	Zcchc8	5.12754	Obsl1	3.67958	Rgp1	5.3946	Mtx1	3.85856	Zfp560	4.12107
Cdkal1	Ttll5	Hspa2	Wars1	Mlh3	Fkbp3		Dnajb5	6.6405	Scrt1	4.43349	Srsf4	5.22836	Sema4a	4.36263	Asphd1	1.98743	2410004B18Rik	3.84479
E2f3	Tgfb3	Plekhg3	Begain	Nek9	Mdga2		Sall3	2.5294	Slc25a30	2.83705	Akap9	7.5801	Prrg1	4.12228	Myo9b	6.26681	Adam8	2.3717
Uqcrfs1	Vash1	Sptb	Ppp2r5c	Tmed10	Rps29		Hbegf	2.43684	Myo7a	4.95718	Uchl3	4.55008	Gm10778	0.819534	Zmynd8	6.82061	Trp53inp2	7.53469
Foxq1	Irf2bpl	Gpx2	Dync1h1	Fos	Rpl36al		Peo1	3.6473	Mlxip	5.32921	Sntb2	5.19267	Fam57b	4.74879	0610030E20Rik	4.96238	Ptk7	3.13368
Foxf2	Zdhhc22	Rab15	1700001K19Rik	Jdp2	Mgat2		Zfp52	3.87602	L3hypdh	1.1498	Usp45	5.0754	Fam114a1	3.12936	Zfp575	1.3894	Armcx6	1.38778
Foxc1	Tmem63c	Fntb	Hsp90aa1	Erg28	Dnaaf2		Swt1	5.11741	Zbtb3	1.73609	Cebpz	0.360806	Pkib	3.26658	Plin2	1.98743	Elfn2	6.58157
Wrnip1	Gstz1	Max	Mok	Ttll5	Klhdc1		Slc31a1	5.48601	Copz2	-0.667601	Cgnl1	4.37385	Ntn4	2.84911	Kcnmb1	1.5079	Pecr	1.97948
Tubb2b	Tmed8	Fut8	Zfp839	Tgfb3	Klhdc2		Kcnn2	4.96002	Pes1	4.36282	Snx12	5.10506	Nr4a1	4.72334	Aldh4a1	4.07238	Vwf	4.46233
Psmg4	Vipas39	Gphn	Tecpr2	Ift43	Arf6		Nudt16	1.00457	Slc5a3	7.09289	Ino80d	6.81424	Mrps28	1.83932	Tnip1	3.39832	Tpgs1	1.75485
Slc22a23	Ahsa1	Mpp5	Ankrd9	Vash1	Vcpkmt		Pcnxl3	5.03824	Ubox5	3.51559	BC068281	3.48506	Serhl	2.29918	Clec11a	2.04082	Midn	3.55023
Prpf4b	Sptlc2	Atp6v1d	Rcor1	Irf2bpl	Sos2		1500015O10Rik	3.50259	2510039O18Rik	2.09925	Zcchc8	5.11854	Col4a5	3.66828	Cyp26b1	3.60744	Omd	0.965968
Nrn1	Alkbh1	Tmem229b	Traf3	Zdhhc22	Atl1		Sh3bp5	6.25754	Fam163a	3.44365	Scrt1	5.1948	Cyp4f13	3.36392	Ppp1r14a	1.3894	Prrt1	5.70545
Rreb1	Nrp	Plekhh1	Amn	Tmem63c	Map4k5		Gm10644	-0.533436	Papola	6.36453	Slc25a30	2.72634	1700026L06Rik	-0.682797	Ficd	2.93136	Dnah11	4.86082
Ssr1	Adck1	Pigh	Cdc42bpb	Ngb	Sav1		Kntc1	0.960925	Ttbk1	6.01873	Myo7a	4.73947	Adhfe1	0.763553	Snx15	3.48756	Naa10	3.08617
Dsp	Nrxn3	Vti1b	Gm266	Gstz1	Nin		Derl3	-0.303129	Cep135	4.26484	Mlxip	5.20747	Rprd1a	7.20741	Pstpip2	3.00038	C4b	2.20379
Snrnp48	Dio2	Rdh12	Mark3	Tmed8	Trim9		Rassf9	1.85629	Samd14	3.84567	L3hypdh	-0.057551	Tango2	4.28522	Rai1	6.02658	Stx4a	4.34614
Bmp6	Gtf2a1	Zfp36l1	Ckb	Vipas39	Tmx1		Acvrl1	2.76336	Cybb	0.733423	Zbtb3	1.8483	Cacna2d4	1.07086	Amer2	5.28081	Ndufaf2	1.58295
Txndc5	Ston2	Dcaf5	Trmt61a	Ahsa1	Frmd6		Ddc	2.48386	Plbd2	5.24102	Copz2	1.23979	Zfp217	3.19432	Fkbpl	2.50708	Aasdhppt	0.008183
Slc35b3	Sel1l	Exd2	Bag5	Sptlc2	Arid4a		Ccdc86	2.82553	Mcoln1	4.24684	Pes1	4.53675	Psmb8	1.20301	Paqr9	5.08501	Bcorl1	5.31002
Gcnt2	Flrt2	Galnt16	Coa8	Nrp	Tomm20l		Spink10	1.34737	Chmp5	5.12426	Slc5a3	7.40498	Zc3h18	5.29445	Zswim4	3.94513	Tpst2	3.58482
Pak1ip1	Kcnk10	Slc39a9	Klc1	Nrxn3	Dact1		Lbr	4.26952	Lysmd3	4.10747	Ubox5	3.48506	Tagln2	2.2182	Ncor2	7.35704	Cwc25	4.44361
Smim13	Ptpn21	Ccdc177	Xrcc3	Dio2	Daam1		Ntn1	2.38823	Nod1	2.49461	2510039O18Rik	3.01299	Fst	0.2957	Zcwpw1	2.78257	Top2a	2.42359
Nedd9	Eml5	Susd6	Zfyve21	Cep128	Gpr135		3110062M04Rik	2.21327	Pik3ap1	0.80078	Fam163a	3.98952	Trim21	1.20301	Ddx55	5.20973	Zc3h13	6.85512
Tmem170b	Foxn3	Srsf5	Ppp1r13b	Gtf2a1	Jkamp		Pkn1	4.93486	Hsd17b10	3.3568	Papola	6.50415	Homer1	8.31653	Nupl2	3.68495	Dio2	6.65802
Hivep1	Tdp1	Smoc1	Atp5mj	Ston2	Rtn1		Ube2v2	5.66158	Syne2	6.44173	Pkn3	0.360806	Prelp	4.93771	Blm	3.22461	Rims4	4.82268
Edn1	Psmc1	Cox16	Tmem179	Sel1l	Pcnx4		Shc3	5.0513	Aff1	5.48579	Ttbk1	6.16928	Gm5174	-1.24657	Mzt2	2.79816	Luzp1	6.90731
Phactr1	Calm1	Gm20498	Adss1	Flrt2	Ppm1a		Gm13199	0.494079	Myo10	6.15206	Cep135	4.26487	Rabl3	3.29648	Mkl1	5.74625	Rbm17	5.05016
Tbc1d7	Ttc7b	Synj2bp	Akt1	Ptpn21	Mnat1		Pard6b	2.11712	Tyrobp	2.43226	Samd14	4.42178	Phc1	2.64736	Foxk1	6.56898	Elmo3	0.965968
Gfod1	Rps6ka5	Ttc9	Cep170b	Eml5	Prkch		Fgf5	1.62416	Lancl3	3.19096	Cybb	0.531836	Rnh1	4.01848	Vars2	3.94513	Swsap1	2.3717
Ranbp9	Gpr68	Map3k9	Pld4	Foxn3	Hif1a		Tubb6	-0.664027	Gjc3	6.16649	Plbd2	5.31095	Pnkp	3.52411	Sec14l2	5.60271	Rrp36	2.63644
Jarid2	Cpsf2	Pcnx	Clba1	Tdp1	Snapc1		Arhgap36	1.04694	Sgsm3	4.65442	Mcoln1	4.47518	Col4a6	0.705311	Rhno1	0.349481	Srek1ip1	4.5641
Dtnbp1	Slc24a4	Sipa1l1	Btbd6	Kcnk13	Syt16		Golgb1	7.52977	Myh9	7.19578	Chmp5	5.50657	Aasdh	1.81198	Sass6	4.0978	Wdr16	2.39788
Mylip	Lgmn	Rgs6	Brf1	Calm1	Ppp2r5e		Gmds	2.8734	Cflar	5.5557	Lysmd3	4.30475	Trp53inp1	5.86096	Vat1	3.29223	Mgme1	2.67976
Gmpr	Golga5	Dpf3	Pacs2	Ttc7b	Wdr89		Map3k15	2.37166	Ell	3.3568	Nod1	2.55176	Setd8	5.54953	Safb	6.78388	Acbd6	4.14445
Rbm24	Chga	Zfyve1	Tex22	Rps6ka5	Sgpp1		Zhx3	7.20965	Fam161b	3.52558	Pik3ap1	1.61448	Hhip	3.27662	Dexi	3.04025	Sytl5	2.91547
Cap2	Itpk1	Rbm25	Crip2	Gpr68	Syne2		Frmpd1	3.6265	Nfatc2ip	2.853	Hsd17b10	3.62392	R3hcc1l	5.15997	Kif19a	1.06792	Loxl3	2.61428
Fam8a1	Moap1	Psen1	Crip1	Slc24a4	Mthfd1		Atp13a4	4.2055	Fkbp4	5.62471	Syne2	6.33249	Mdfic	3.62966	Zfp560	4.47285	Snrnp40	4.10527
Nup153	Ubr7	Papln	Dync2i1	Lgmn	Akap5		Zap70	0.915915	Dot1l	6.11945	Aff1	5.13633	Ltbr	2.0875	2410004B18Rik	4.1534	Hist2h2aa2	0.469638
Nhlrc1	Btbd7	Numb	Esyt2	Golga5	Zbtb25		Mus81	3.31597	Dnajb5	6.65583	Myo10	5.99623	Chgb	8.61379	Adam8	3.12922	Tcfl5	-0.293092
Dek	Unc79	Riox1	Ptprn2	Chga	Zbtb1		Gm7353	1.0881	Sall3	2.57377	Lor	0.778328	Npc1l1	0.763553	Trp53inp2	7.28971	Zfp583	3.6297
Zfp169	Prima1	Acot2	Rapgef5	Itpk1	Hspa2		Adat1	3.15097	Hbegf	2.25147	Tyrobp	2.51144	Mrpl40	3.57379	Ptk7	3.07906	Arhgap23	6.97951
Ptpdc1	Otub2	Acot1	Sp4	Moap1	Sptb		Wdr93	0.366069	Peo1	3.63112	Lancl3	3.21901	Chchd10	5.05603	Armcx6	1.34763	Gfra2	5.09085
Phf2	Ddx24	Acot4	Itgb8	Ubr7	Churc1		Grpel2	2.80098	Zfp52	4.10081	Gjc3	5.85297	Epha8	0.705311	Elfn2	6.46539	Klhl38	0.739043
Fam120a	Serpina3n	Acot5	Tasor2	Btbd7	Max		Arhgef15	2.71163	Swt1	5.30041	Sgsm3	4.57638	Map3k13	5.56189	Pecr	2.0668	Noc4l	2.95126
Wnk2	Dicer1	Pnma1	Net1	Unc79	Fam71d		Gpatch3	1.7577	Slc31a1	5.73429	Myh9	7.00664	Pyroxd2	1.16029	Vwf	4.58045	1810043H04Rik	2.04721
Card19	Glrx5	Elmsan1	Akr1e1	Prima1	Mpp5		9830147E19Rik	3.68803	Kcnn2	5.07069	Cflar	5.19692	Trim12a	1.50566	Tpgs1	2.0668	Nfe2l2	4.11319
Bicd2	D430019H16Rik	Fam161b	Klf6	Otub2	Atp6v1d		Gatsl2	6.53282	Nudt16	0.245858	Ell	3.79606	Plk3	2.17593	Midn	2.58104	Fah	4.14445
Ippk	Atg2b	Bbof1	Pitrm1	Ddx24	Eif2s1		Tns1	6.00832	Pcnxl3	5.07749	Fam161b	3.89864	Adipor2	6.26542	Omd	0.845903	Pdzd2	6.90617
Ecm2	Papola	Rnf113a2	Pfkp	Serpina3n	Tmem229b		Ccdc64	5.06167	1500015O10Rik	3.62184	Nfatc2ip	2.77257	Zfp821	4.17151	Prrt1	5.34059	Chrm4	3.74635
Iars1	Bcl11b	Aldh6a1	Wdr37	Dicer1	Plekhh1		Zfp185	3.06081	Sh3bp5	6.53122	Fkbp4	5.71181	3100002H09Rik	1.2445	Dnah11	3.70163	Casc1	1.94439
Spin1	Setd3	Syndig1l	Larp4b	Glrx5	Vti1b		Sbk1	5.48793	Gm10644	-0.496109	Dot1l	5.78411	0610010F05Rik	2.31874	Naa10	3.21303	Fam189a2	3.13368
S1pr3	Ccnk	Isca2	Dip2c	D430019H16Rik	Rdh12		Setd1b	3.95045	Kntc1	0.985817	Dnajb5	6.65368	Prodh	4.27525	C4b	2.2366	Car15	0.965968
Shc3	Ccdc85c	Arel1	Zmynd11	Atg2b	Zfyve26		Synm	6.06096	Rassf9	1.55287	Sall3	2.92362	Pde4c	0.873423	Stx4a	3.88069	Vax1	-0.293092
Secisbp2	Cyp46a1	Ylpm1	Chrm3	Papola	Zfp36l1		Pask	2.67157	Acvrl1	2.96001	Hbegf	2.66639	Mbd6	4.48018	Ndufaf2	1.93198	Palm2	4.85138
Sema4d	Eml1	Dlst	Ryr2	Bcl11b	Actn1		Kmt2c	6.67889	Ddc	2.27534	Peo1	3.64271	Eva1a	3.8132	Aasdhppt	0.431738	Bglap3	-0.471164
Diras2	Degs2	Rps6kl1	Mtr	Setd3	Dcaf5		Inf2	6.13156	Ccdc86	2.75451	Zfp52	3.86169	Myrf	5.52238	Bcorl1	4.93795	Ggct	3.82564
Sfxn1	Yy1	Eif2b2	Actn2	Ccnk	Exd2		Lactb2	4.7676	Spink10	1.34294	Swt1	5.09827	Sh3rf3	5.72284	Tpst2	3.91684	Cyp4f14	2.34504
Cplx2	Slc25a29	Mlh3	Heatr1	Ccdc85c	Galnt16		Maats1	2.17557	Lbr	4.44932	Bfsp1	-0.423924	Slc17a8	3.10704	Cwc25	3.95211	Tmem107	2.29019
4833439L19Rik	Slc25a47	Acyp1	Lgals8	Cyp46a1	Erh		Pirt	-0.014687	Ntn1	2.25147	Slc31a1	5.20537	Fv1	3.07289	Top2a	3.40851	3110021N24Rik	1.2793
Nop16	Wars	Nek9	Gpr137b	Eml1	Slc39a9		Spg7	4.83866	3110062M04Rik	1.8358	Kcnn2	4.76828	Mob3c	2.46632	Zc3h13	6.77996	Pnn	5.99418
Higd2a	Begain	Tmed10	Nid1	Degs2	Plekhd1		Per1	5.92417	Pkn1	4.83397	Nudt16	0.635538	Mcts2	3.11824	Dio2	6.77012	Nipal4	2.01374
Cltb	Dio3	Fos	Gng4	Yy1	Ccdc177		Sh3d19	6.09417	Ube2v2	5.53607	Pcnxl3	5.14074	Acnat1	0.873423	Rims4	4.46311	Abcc10	3.35025
Rnf44	Ppp2r5c	Jdp2	Ggps1	Slc25a47	Srsf5		Erich2	0.366069	Shc3	4.94978	1500015O10Rik	3.30016	Polm	2.23887	Luzp1	7.01741	E130114P18Rik	-0.674351
Gprin1	Dync1h1	Erg28	Arid4b	Wars	Slc8a3		S100a13	2.15635	Gm13199	0.865132	Sh3bp5	6.09163	Nkain1	1.07086	Rbm17	4.80924	Gabpb1	2.96883
Sncb	1700001K19Rik	Ttll5	Hecw1	Begain	Synj2bp		Slc9a5	3.81604	Pard6b	1.92907	Kntc1	0.684722	Gm11808	1.81198	Elmo3	0.961179	Ttc23	2.47368
Tspan17	Hsp90aa1	Tgfb3	Psma2	Dlk1	Ttc9		Acaa2	3.12154	Fgf5	1.7701	Derl3	-0.057551	Atp5j	6.53155	Swsap1	2.98684	Pcdhb2	2.39788
Hk3	Wdr20	Gpatch2l	Gli3	Dio3	Map3k9		Bola1	-0.014687	Tubb6	0.038255	Rassf9	1.66437	Ifitm1	0.372562	Rrp36	3.09176	Gse1	6.8563
Uimc1	Mok	Vash1	Cdk13	Ppp2r5c	Pcnx		Foxo4	3.49496	Golgb1	7.61025	Acvrl1	2.92362	Cfp	3.74978	Srek1ip1	4.41336	Gdf11	4.52306
Zfp346	Zfp839	Irf2bpl	Yae1d1	Dync1h1	Sipa1l1		Jup	4.21017	Gmds	2.7714	Ddc	2.42724	Srrd	3.10704	Wdr16	1.58182	Klf2	3.00334
Nsd1	Tecpr2	Cipc	Amph	1700001K19Rik	Dpf3		Papd5	6.30959	Map3k15	2.53473	Ccdc86	2.96403	Ccdc30	4.81914	Mgme1	3.00038	4931406C07Rik	4.26313
Rab24	Ankrd9	Zdhhc22	Epdr1	Hsp90aa1	Dcaf4		2310003H01Rik	2.76336	Zhx3	7.41651	Spink10	0.94908	Syde1	2.70793	Acbd6	4.20694	Wdr4	3.94584
Prelid1	Rcor1	Gstz1	Elmo1	Wdr20	Rbm25		C030048H21Rik	0.069928	Frmpd1	3.50553	Lbr	4.06112	Cdc26	3.60598	Sytl5	3.29223	Myo5c	2.44885
Lman2	Traf3	Tmed8	Trim27	Mok	Psen1		Mettl3	4.11381	Atp13a4	3.96058	Ntn1	2.76115	Cars2	1.69713	Loxl3	1.75157	Ammecr1l	5.84993
Rgs14	Amn	Vipas39	H2ac13	Zfp839	Papln		Robo3	4.65911	Zap70	0.985817	3110062M04Rik	1.992	Dsc2	1.43574	Snrnp40	4.21277	Crtc2	4.24882
Grk6	Cdc42bpb	Ahsa1	H3c10	Tecpr2	Riox1		Kcnc3	6.48644	Mus81	2.73742	Pkn1	4.96277	Zfp109	3.30631	Hist2h2aa2	-0.413472	Trim67	2.70094
Prr7	Mark3	Sptlc2	H2bc14	Ankrd9	Acot2		Wipf3	8.87249	Gm7353	0.51014	Ube2v2	5.73971	Tmem176b	4.05974	Zfp583	4.00681	Etfb	-1.19404
Dok3	Ckb	Nrp	H4c12	Rcor1	Acot4		Irgm1	3.55491	Adat1	3.47492	Shc3	5.19055	Tut1	4.04807	Arhgap23	6.66457	Tfeb	2.82189
Ddx41	Trmt61a	Nrxn3	H2ac15	Amn	Acot3		Gm8206	-0.303129	Wdr93	0.51014	Gm13199	0.021151	Lars2	5.28454	Gfra2	5.09451	Golm1	6.22555
Fam193b	Bag5	Dio2	H1f5	Cdc42bpb	Acot5		Kif1c	6.62573	Grpel2	2.853	Pard6b	2.38322	Gm16503	0.581262	Noc4l	3.11685	A330021E22Rik	5.58244
B4galt7	Klc1	Gtf2a1	H3c11	Mark3	Pnma1		Noc3l	4.37306	Arhgef15	2.7714	Fgf5	1.75927	Retsat	3.79935	1810043H04Rik	1.26029	Hfe	3.1645
Caml	Xrcc3	Ston2	H2ac22	Ckb	Elmsan1		Cntn2	5.75239	Gpatch3	1.70126	Arhgap36	1.5628	Haus8	2.61608	Nfe2l2	4.38267	Znfx1	6.03228
Ddx46	Zfyve21	Sel1l	H2ac23	Trmt61a	Bbof1		Ormdl3	4.65911	9830147E19Rik	3.89274	Golgb1	7.51403	Peli3	3.56563	Htr1d	0.070164	Zfp462	7.14611
B230219D22Rik	Ppp1r13b	Flrt2	H4c17	Bag5	Aldh6a1		Ddi2	4.31357	Gatsl2	6.53369	Gmds	3.20222	Fkbp2	4.25509	Fah	3.86597	Neil2	-0.674351
Txndc15	Atp5mpl	Kcnk10	H2ac12	Klc1	Syndig1l		Ppp2r2b	2.46836	Tns1	6.14883	Map3k15	1.992	Ralb	4.10549	Pdzd2	6.7612	Csad	3.84479
Pcbd2	Tmem179	Ptpn21	H2ac11	Xrcc3	Npc2		Rarres2	1.73196	Ccdc64	5.29166	Zhx3	7.11602	Sesn2	3.11824	Chrm4	3.21303	Gpaa1	3.55023
Macroh2a1	Inf2	Eml5	Abt1	Zfyve21	Isca2		3110057O12Rik	4.82351	Zfp185	3.01777	Frmpd1	3.66739	Eif5b	6.98756	Casc1	1.42999	Plk5	3.46612
Smad5	Adssl1	Foxn3	H4c8	Ppp1r13b	Arel1		Mdga2	5.74276	Sbk1	5.44163	Atp13a4	4.30867	Sema4f	5.18683	Fam189a2	1.71918	Rabepk	3.8637
Spock1	Siva1	Tdp1	H2ac10	Atp5mpl	Fcf1		Bod1l	7.11077	Setd1b	4.15329	Zap70	1.06507	Oca2	2.0875	Car15	1.34763	Polr3gl	3.59617
Klhl3	Akt1	Psmc1	H3c7	Tmem179	Ylpm1		Aldh16a1	0.960925	Synm	6.02578	Mus81	3.46408	Ago3	6.13499	Vax1	-0.151482	Cldn25	0.56514
Hnrnpa0	Cep170b	Calm1	H4c6	Inf2	Prox2		Cep164	3.91657	Pask	2.61177	Gm7353	1.5628	Apln	3.77831	Palm2	5.15932	Taok3	5.73911
Idnk	Jag2	Ttc7b	H1f3	Adssl1	Dlst		Ccdc66	5.04609	Kmt2c	6.81804	Adat1	2.62918	Ppil4	6.27045	Bglap3	0.169401	Lurap1l	4.98258
Ubqln1	Nudt14	Rps6ka5	H3c6	Siva1	Rps6kl1		Ccdc41	5.22049	Inf2	6.39482	Wdr93	-0.057551	BC021891	1.50566	Ggct	3.72628	Arid4a	6.29858
Gkap1	Btbd6	Gpr68	H2ac8	Akt1	Eif2b2		Tbc1d10a	3.23583	Lactb2	4.91979	Grpel2	2.48391	Ccnd3	4.12228	Cyp4f14	2.59895	Pou6f2	0.818717
Hnrnpk	Brf1	Ccdc88c	H2ac7	Cep170b	Zc2hc1c		Hspa2	5.24344	Maats1	2.47412	Arhgef15	2.89256	Crot	6.05417	Tmem107	1.58182	Zdhhc23	4.65373
Ntrk2	Pacs2	Atxn3	H3c4	Nudt14	Nek9		Slc22a15	3.25403	Spg7	4.88141	Gpatch3	1.58887	Elovl2	5.06474	3110021N24Rik	0.904692	Gm10704	1.58295
Agtpbp1	Tex22	Slc24a4	H4c4	Btbd6	Tmed10		E130308A19Rik	4.68282	Per1	6.12439	9830147E19Rik	3.87764	Hist3h2a	4.5969	Pnn	5.48243	Ccdc154	-0.134605
Naa35	Mta1	Lgmn	H2bc6	Brf1	Jdp2		Eftud1	4.67608	Sh3d19	6.44305	Gatsl2	6.5538	Eral1	3.3354	Nipal4	1.98743	Zfp563	4.23436
Golm1	Crip2	Golga5	H1f4	Pacs2	Ttll5		Pacs2	6.25529	Erich2	0.145787	Tns1	5.80512	Galnt3	3.72067	Abcc10	3.16574	Cyb5	5.09885
Isca1	Crip1	Chga	H2ac6	Tex22	Gpatch2l		Zbtb5	3.94485	S100a13	1.8358	Ccdc64	4.95527	Plod2	3.46391	Grb7	-0.036407	Necap2	3.88236
Tut7	Zfp386	Itpk1	H4c3	Crip2	Vash1		Kif11	1.83227	Slc9a5	3.6031	Zfp185	2.83926	Park7	1.07086	Gabpb1	3.45842	Erbb3	4.96955
Dapk1	Wdr60	Moap1	H1f2	Crip1	Irf2bpl		Zfp433	1.80784	Acaa2	3.26438	Sbk1	5.5134	Bcar3	3.27662	Ttc23	2.70199	Zic3	3.55023
BC051665	Esyt2	Gon7	H3c3	Tmem121	Cipc		Lca5	4.13361	Bola1	0.662767	Setd1b	3.85634	Map4k1	0.128481	Pcdhb2	2.30367	Rhod	0.56514
Aopep	Ncapg2	Ubr7	H2bc3	Zfp386	Zdhhc22		Gale	2.0971	Foxo4	3.96058	Synm	6.03468	Efcab5	3.69845	Gse1	6.83674	Bmp5	2.34504
Ptch1	Ptprn2	Unc79	H2ac4	Wdr60	Tmem63c		Gss	3.37537	Jup	4.346	Pask	2.71455	BC005624	5.29198	Gdf11	4.33002	Flt1	6.73833
Habp4	Sp4	Prima1	H3c2	Esyt2	Ngb		Kcnk1	5.86768	Papd5	6.40568	Kmt2c	6.61376	Lman2	6.02917	Klf2	2.76681	Stat2	4.63734
Mfsd14b	Itgb8	Otub2	H4c2	Ncapg2	Gstz1		Ttc18	2.0562	2310003H01Rik	2.8046	Inf2	5.96297	Mppe1	2.98994	4931406C07Rik	4.71793	Ormdl2	2.3717
Uqcrb	Tmem196	Ddx24	H4c1	Ptprn2	Pomt2		Pcdhb7	3.14123	C030048H21Rik	-0.496109	Lactb2	4.75395	Safb2	6.03657	Wdr4	3.95906	Cspp1	6.74854
Zfp458	Gdi2	Ppp4r4	H1f1	Sp4	Tmed8		Dnajc25	3.00817	Mettl3	4.1977	Maats1	1.95238	Prpf3	5.06184	Myo5c	2.76681	Dnaaf3	1.58295
Zfp748	Tasor2	Serpina10	Scgn	Itgb8	Ahsa1		Asap2	5.97854	Robo3	4.99721	Spg7	4.70114	Edem2	4.2139	Ammecr1l	5.88045	Kcna5	1.09957
Cfap90	Net1	Dicer1	Carmil1	Tmem196	Ism2		Otud7b	6.36715	Kcnc3	6.60609	Per1	5.73971	Ppp1r1b	4.7949	Crtc2	3.86597	Spire2	2.8411
Adcy2	Akr1e1	Glrx5	Ripor2	Gdi2	Sptlc2		Ubtd1	1.70576	Wipf3	9.28251	Sh3d19	5.7827	Fam43a	2.17593	Trim67	2.58104	Myc	1.90842
Tent4a	Klf6	D430019H16Rik	Armh2	Tasor2	Alkbh1		Zfp382	4.15313	Irgm1	3.59363	Erich2	0.531836	S1pr5	2.64736	Etfb	-0.733835	Smarca4	7.40679
Nsun2	Pfkp	Bdkrb1	D130043K22Rik	Asb13	Nrp		Eya2	0.494079	Gm8206	-0.496109	S100a13	2.19236	Cep250	5.63586	Tfeb	2.0668	Eif3a	7.65625
Ube2ql1	Wdr37	Atg2b	Mrs2	Net1	Adck1		Cav1	3.96156	Kif1c	6.7333	Slc9a5	3.81275	Bahd1	5.36903	Golm1	6.69924	Mtmr2	2.44885
Med10	Gtpbp4	Papola	Nrsn1	Akr1e1	Nrxn3		Ttf1	4.11878	Noc3l	4.74271	Acaa2	3.22734	Nfic	5.78039	A330021E22Rik	5.28911	Gm17482	-0.134605
Ice1	Larp4b	Vrk1	Sox4	Klf6	Dio2		Hydin	3.60539	Cntn2	5.91804	Bola1	0.531836	Enthd2	3.49862	Hfe	1.93198	Ndufa13	4.9955
Tert	Dip2c	Bcl11b	E2f3	Wdr37	Gtf2a1		Slc28a3	0.771789	Ormdl3	4.40672	Foxo4	3.28429	Gpr68	4.02445	Znfx1	6.05118	Diras1	5.17273
Nkd2	Zmynd11	Setd3	Uqcrfs1	Gtpbp4	Sel1l		Foxr2	-0.014687	Ddi2	4.76396	Jup	4.14698	Kank3	4.0828	Oas2	0.349481	Slc5a10	-0.134605
Brd9	Chrm3	Ccnk	Exoc2	Dip2c	Flrt2		Ovol2	-0.533436	Ppp2r2b	1.89865	Papd5	6.19921	Recql4	1.78411	Zfp462	7.23706	Supt7l	4.15983
Zdhhc11	Ryr2	Ccdc85c	Foxc1	Zmynd11	Galc		Pkdcc	2.42082	Rarres2	1.73609	2310003H01Rik	2.83926	Sipa1l3	7.56608	Neil2	-0.413472	Kri1	4.52306
Tppp	Mtr	Cyp46a1	Wrnip1	Chrm3	Kcnk10		Dact1	3.19873	3110057O12Rik	4.96086	C030048H21Rik	-0.057551	Cdhr3	2.15433	Csad	3.82851	Mif4gd	1.7948
Exoc3	Actn2	Eml1	Tubb2a	Ryr2	Spata7		Rock1	6.64912	Mdga2	5.72565	Mettl3	3.79606	Ppig	7.19093	Gpaa1	3.20135	Hmg20b	3.11802
Sdha	Lgals8	Evl	Tubb2b	Mtr	Ptpn21		Samd9l	3.79133	Bod1l	7.18637	Robo3	4.40721	Psmc3ip	0.873423	Plk5	2.71847	Rfx1	4.00665
Ccdc127	Gpr137b	Degs2	Psmg4	Actn2	Zc3h14		Wfs1	5.95925	Aldh16a1	1.55287	Kcnc3	6.3488	Ace	5.96546	Rabepk	4.3407	Casp6	1.94439
Lrrc14b	Nid1	Yy1	Slc22a23	Lgals8	Eml5		Zic5	2.58796	Cep164	3.9157	Wipf3	8.55742	Mrps15	4.21912	Polr3gl	3.72628	Phactr2	6.54543
Mctp1	Lyst	Slc25a29	Prpf4b	Gpr137b	Tdp1		Lcor	6.07254	Ccdc66	5.16637	Irgm1	3.44992	Mtx1	3.96363	Cldn25	1.26029	Elovl7	5.90573
Nr2f1	Gng4	Slc25a47	Eci2	Nid1	Psmc1		Gm14322	2.93109	Ccdc41	5.40962	Gm8206	-0.776528	Asphd1	2.97769	Taok3	5.88228	Rrp8	3.30946
Mef2c	B3galnt2	Wars	Nrn1	Lyst	Nrde2		Kirrel2	2.19454	Tbc1d10a	3.10029	Kif1c	6.4456	Myo9b	6.40347	Lurap1l	4.97615	Trmt44	3.1645
Rasa1	Ggps1	Wdr25	Rreb1	Gng4	Calm1		Vcl	6.19062	Hspa2	5.41232	Noc3l	4.24861	Zmynd8	6.96214	Arid4a	6.5134	Gm10132	-0.134605
Edil3	Arid4b	Begain	Ssr1	B3galnt2	Ttc7b		Cnpy4	2.72474	Slc22a15	3.08686	Cntn2	5.64504	0610030E20Rik	4.92819	Pou6f2	0.961179	Zfp59	3.00334
Vcan	Hecw1	Dlk1	Riok1	Ggps1	Rps6ka5		Spin2c	1.90317	E130308A19Rik	4.71242	Ormdl3	4.83243	Zfp575	1.78411	Zdhhc23	4.66365	Arpc3	6.31928
Zcchc9	Mrpl32	Dio3	Dsp	Arid4b	Gpr68		Phf2	5.524	Eftud1	4.71242	Ddi2	4.02337	Plin2	3.27662	Gm10704	2.81358	Crip3	1.09957
Ckmt2	Gli3	Ppp2r5c	Snrnp48	Hecw1	Tc2n		Scn7a	2.95354	Pacs2	6.42582	Ppp2r2b	2.91335	Kcnmb1	0.975515	Casc5	1.58182	Specc1	7.22864
[truncated: 11,989 more rows]

## Sheet: Table C
S3. List of ac4C mRNAs identified by low-input acRIP-seq (SYN)								S3. List of mRNAs identified by low-input acRIP-seq (SYN)
Control (ac4C mRNA)			Learning (ac4C mRNA)					Control (mRNA)						Learning (mRNA)
Day 1	Day 6	Day 20	Day 1	Day 6	Day 20			Day 1_genename	Day 1_normalized count	Day 6_genename	Day 6_normalized count	Day 20_genename	Day 20_normalized count	Day 1_genename	Day 1_normalized count	Day 6_genename	Day 6_normalized count	Day 20_genename	Day 20_normalized count
Xkr4	Xkr4	Xkr4	Xkr4	Xkr4	Xkr4			Arl8b	7.69644	Tssc1	1.6354	Arl8b	7.51972	Arl8b	7.56016	Klc2	2.61079	Arl8b	7.69522
Rgs20	Rgs20	Tcea1	Lypla1	Rgs20	Rgs20			Syne1	8.73389	Grk6	0.833938	Syne1	8.71358	Syne1	8.6787	Mrpl42	2.3944	Syne1	8.81359
Rb1cc1	Atp6v1h	Rgs20	Tcea1	Rb1cc1	Rb1cc1			Smox	5.21858	Nefh	1.85441	Smox	5.2201	Smox	5.14881	Txnl4b	4.13204	Smox	5.07913
Pcmtd1	Pcmtd1	Rb1cc1	Rb1cc1	Arfgef1	Pcmtd1			Aamp	5.98051	Zfp703	0.990059	Aamp	5.78474	Aamp	5.81906	Strip2	2.21719	Aamp	5.88394
Arfgef1	Sntg1	Pcmtd1	Adhfe1	Prex2	Sntg1			Parp6	0.76466	Pcp4	-0.388476	Parp6	0.474995	Parp6	0.971928	Slc35c2	2.21719	Parp6	0.154027
Prex2	Arfgef1	Sntg1	Arfgef1	Ncoa2	Adhfe1			Rph3a	8.04885	Tgfb1i1	1.25925	Rph3a	7.98655	Rph3a	7.78989	Fos	2.32611	Rph3a	7.97997
Stau2	Prex2	Stau2	Prex2	Tram1	Arfgef1			Mul1	4.83404	Gpr153	1.37709	Mul1	4.76398	Mul1	4.65295	Pbx3	2.74762	Mul1	4.8673
Gdap1	Tram1	Paqr8	Stau2	Stau2	Ncoa2			Mbp	13.3246	Baz1b	2.36288	Mbp	13.0257	Mbp	13.2901	Tmpo	3.37329	Mbp	13.1983
Paqr8	Stau2	Kcnq5	Paqr8	Tmem14a	Paqr8			Sphkap	8.31602	Brf1	2.69335	Sphkap	8.21389	Sphkap	8.24482	Ndufa5	1.3694	Sphkap	8.32414
Kcnq5	Gdap1	Rims1	Kcnq5	Kcnq5	Kcnq5			Strn4	7.25967	Rcbtb2	1.81319	Strn4	7.17222	Strn4	7.19237	Stard10	3.43943	Strn4	7.12617
Rims1	Paqr8	Ogfrl1	Rims1	Rims1	Rims1			Med13	7.96308	Mrpl43	1.25925	Med13	7.9786	Med13	7.9527	Nnt	3.15443	Med13	8.07829
Ogfrl1	Kcnq5	Smap1	Ogfrl1	Ogfrl1	Ogfrl1			Lynx1	8.49261	Bop1	1.25925	Lynx1	8.30292	Lynx1	8.15444	Gabpa	1.22685	Lynx1	8.19374
Smap1	Rims1	Phf3	Phf3	Lmbrd1	Smap1			Npepps	7.37507	Dach1	2.0797	Npepps	7.34911	Npepps	7.39747	Oprl1	1.22685	Npepps	7.3426
Phf3	Ogfrl1	Rab23	Rab23	Phf3	Phf3			Copb1	6.04372	Egr3	1.37709	Copb1	6.09708	Copb1	6.19153	Ntng1	2.42737	Copb1	6.20826
Rab23	Phf3	Bend6	Dst	Rab23	Rab23			Mzt1	5.87551	1700003E16Rik	2.39117	Mzt1	5.84282	Mzt1	6.0258	Sh2b1	1.06865	Mzt1	5.99253
Bend6	Bend6	Dst	Arhgef4	Bend6	Bend6			Blzf1	4.47117	Htr1b	1.81319	Blzf1	4.46153	Blzf1	4.46518	Trim46	1.06865	Blzf1	4.46125
Dst	Dst	Arhgef4	Fam168b	Dst	Dst			Hs6st2	6.11226	Sox10	1.93348	Hs6st2	6.2617	Hs6st2	5.88924	Arpc5	3.09411	Hs6st2	6.01372
Arhgef4	Arhgef4	Hs6st1	Hs6st1	Arhgef4	Arhgef4			Prex2	8.89402	Tsen34	1.19651	Prex2	8.8308	Prex2	8.94498	Park7	0.890934	Prex2	9.13625
Hs6st1	Plekhb2	Actr1b	Lman2l	Plekhb2	Fam168b			Pou6f1	6.77919	Rbm18	2.21246	Pou6f1	6.60542	Pou6f1	6.42422	Aasdhppt	0.890934	Pou6f1	6.38454
Uggt1	Hs6st1	Tmem131	Cox5b	Hs6st1	Plekhb2			Cnp	7.96176	Mrps17	2.47285	Cnp	7.98952	Cnp	7.95617	Prkar1b	0.793132	Cnp	7.84638
Lman2l	Uggt1	Inpp4a	Tmem131	Uggt1	Hs6st1			Ddx42	6.54423	Dhx32	2.75995	Ddx42	6.56618	Ddx42	6.56472	Fgf14	2.61079	Ddx42	6.46521
Tmem131	Lman2l	Unc50	Unc50	Lman2l	Uggt1			Cyc1	5.10784	Mrps2	1.89449	Cyc1	5.06358	Cyc1	5.08137	Fam172a	0.688216	Cyc1	5.14207
Unc50	Cox5b	Mgat4a	Mgat4a	Cox5b	Kansl3			Tpm3	6.74978	Pin1	2.36288	Tpm3	6.78022	Tpm3	6.76579	Eci2	0.688216	Tpm3	6.79027
Mgat4a	Actr1b	Txndc9	Txndc9	Actr1b	Lman2l			Fubp1	6.83337	Parvb	2.30458	Fubp1	6.7722	Fubp1	6.74414	Pex11b	0.688216	Fubp1	6.89904
Txndc9	Tmem131	Eif5b	Eif5b	Tmem131	Tmem131			Inpp1	3.90653	Zfp335	3.32672	Inpp1	4.1509	Inpp1	4.24927	Rnasek	1.87874	Inpp1	3.98274
Eif5b	Inpp4a	Rev1	Rev1	Inpp4a	Inpp4a			Gnas	5.26806	Slc9a5	3.0534	Gnas	4.91323	Gnas	5.19657	4833439L19Rik	0.575067	Gnas	5.0466
Rev1	Coa5	Aff3	Aff3	Coa5	Coa5			Scamp1	7.99109	Zfp26	4.27832	Scamp1	7.96307	Scamp1	7.79101	Otub2	2.3944	Scamp1	7.92678
Lonrf2	Unc50	Lonrf2	Lonrf2	Unc50	Unc50			Bin1	7.36909	Thap11	1.72703	Bin1	7.3652	Bin1	7.30091	Dact2	2.25442	Bin1	7.23303
Chst10	Mgat4a	Rpl31	Npas2	Mgat4a	Mgat4a			Cpt1a	5.62379	Cul4b	2.41891	Cpt1a	5.47583	Cpt1a	5.70576	Elp3	0.318068	Cpt1a	5.5544
Npas2	Eif5b	Rnf149	Rpl31	Eif5b	Txndc9			Atg7	4.01279	Rhbdl3	3.59341	Atg7	4.40334	Atg7	4.37911	Phpt1	0.318068	Atg7	4.45507
Rpl31	Aff3	Creg2	Rnf149	Rev1	Eif5b			9530068E07Rik	6.85448	Mars	2.96206	9530068E07Rik	7.04479	9530068E07Rik	6.74529	Tssc1	4.53891	9530068E07Rik	6.87261
Rnf149	Lonrf2	Map4k4	Creg2	Aff3	Rev1			Wipi2	6.58959	Plekhg5	0.990059	Wipi2	6.56353	Wipi2	6.65905	Grk6	3.71786	Wipi2	6.47594
Creg2	Npas2	Tgfbrap1	Map4k4	Lonrf2	Aff3			Tnpo1	7.18964	Sfswap	4.01301	Tnpo1	7.25846	Tnpo1	7.29308	Nefh	4.73602	Tnpo1	7.19829
Map4k4	Rpl31	AI597479	Tgfbrap1	Npas2	Chst10			Champ1	5.01882	Dlg1	2.98079	Champ1	4.8095	Champ1	4.83639	Oaz2	0.890934	Champ1	4.8673
Tgfbrap1	Rnf149	Uxs1	AI597479	Rpl31	Npas2			Pink1	7.54173	Timm8b	-1.12547	Pink1	7.44957	Pink1	7.52319	Zfp703	3.80825	Pink1	7.41288
AI597479	Creg2	Slc39a10	Slc39a10	Creg2	Rpl31			Ttc17	6.38713	Mtf2	2.04451	Ttc17	6.3429	Ttc17	6.1048	Phc1	1.67417	Ttc17	6.24277
Tmeff2	Map4k4	Gls	Tmeff2	Map4k4	Rnf149			Slc7a10	5.67216	Txndc11	3.45286	Slc7a10	5.50656	Slc7a10	5.63325	Pcp4	2.3944	Slc7a10	5.57736
Myo1b	Tgfbrap1	Nab1	Myo1b	Tgfbrap1	Creg2			Prrc2c	8.57385	Pcgf5	2.99929	Prrc2c	8.56091	Prrc2c	8.60604	Dgcr6	2.32611	Prrc2c	8.65167
Gls	AI597479	Inpp1	Stat1	Uxs1	Map4k4			Lhfp	4.65745	Chchd3	4.30086	Lhfp	4.54464	Lhfp	4.68678	Tgfb1i1	3.90507	Lhfp	4.59099
Nab1	Tmeff2	Pms1	Gls	Tpp2	Tgfbrap1			Cep68	5.31035	Camk2n2	2.33402	Cep68	5.23018	Cep68	5.29073	Sgsm1	3.37329	Cep68	5.22799
Mfsd6	Stat1	Hecw2	Nab1	Slc39a10	AI597479			Dlc1	6.68268	Chpf2	4.37355	Dlc1	6.76413	Dlc1	6.71867	Zbtb45	2.74762	Dlc1	6.69641
Inpp1	Gls	Pgap1	Inpp1	Tmeff2	Myo1b			Slc35e3	5.47308	Zfp597	3.35572	Slc35e3	5.44732	Slc35e3	5.34924	Gpr153	3.79568	Slc35e3	5.44945
Hecw2	Nab1	Hspd1	Gtf3c3	Stat1	Stat1			Rabac1	-0.354911	Hmga1	2.14761	Syt3	5.95645	Rabac1	-0.7443	Papolg	1.22685	Syt3	5.78141
Gtf3c3	Mfsd6	Mob4	Sf3b1	Nab1	Gls			Syt3	5.88113	Srsf3	2.33402	Kitl	3.12203	Syt3	5.65539	Myeov2	-0.395004	Kitl	3.58992
Hspd1	Inpp1	1700066M21Rik	Satb2	Mfsd6	Nab1			Kitl	3.0347	Wdr77	4.10127	Tgfb2	6.61827	Kitl	2.97194	Baz1b	4.61959	Tgfb2	6.8025
Mob4	Sf3b1	Bzw1	1700066M21Rik	Inpp1	Mfsd6			Tgfb2	6.85353	Chka	3.43938	Rsbn1l	5.64358	Tgfb2	6.69036	Brf1	4.94968	Rsbn1l	5.65763
Plcl1	Hspd1	Cflar	Orc2	Sf3b1	Gtf3c3			Rsbn1l	5.43791	Eif4e3	2.84422	Lrrn2	8.22904	Rsbn1l	5.71516	Tbc1d20	2.52199	Lrrn2	8.12578
1700066M21Rik	Mob4	Trak2	Cflar	Mob4	Sf3b1			Lrrn2	8.29827	Ufd1l	1.77075	Dact3	7.14762	Lrrn2	8.14751	Chd6	3.79568	Dact3	7.08171
Bzw1	Plcl1	Sumo1	Trak2	Satb2	Hspd1			Dact3	7.4027	Cbfb	3.79743	Myl6	6.29409	Dact3	7.1048	Rcbtb2	3.96243	Myl6	6.15584
Orc2	Satb2	Fam117b	Bmpr2	Bzw1	Clk1			Myl6	6.41712	Taf10	3.45286	Mro	3.80032	Myl6	6.35075	Mrpl43	3.39011	Mro	3.95672
Cflar	1700066M21Rik	Abi2	Fam117b	Clk1	Cflar			Mro	3.89175	Tmem189	2.75995	Habp4	6.46882	Mro	4.10659	Bop1	3.35626	Habp4	6.49866
Trak2	Bzw1	Nrp2	Abi2	Orc2	Trak2			Habp4	6.60212	Pgp	2.47285	Crtac1	7.2041	Habp4	6.53318	Dach1	4.16173	Crtac1	7.12033
Bmpr2	Orc2	Zdbf2	Nrp2	Trak2	Bmpr2			Crtac1	7.18586	Tox	3.39816	Alg10b	6.12075	Crtac1	7.10837	Egr3	3.42318	Alg10b	5.90224
Fam117b	Cflar	Adam23	Zdbf2	Sumo1	Fam117b			Alg10b	5.98574	Dopey2	4.17635	Ttc9b	4.05589	Alg10b	5.89546	1700003E16Rik	4.40461	Ttc9b	4.04993
Nrp2	Trak2	Pikfyve	Adam23	Bmpr2	Wdr12			Ttc9b	4.21036	Srpk1	4.56576	Sh3bgrl3	5.44155	Ttc9b	4.30636	Htr1b	3.80825	Sh3bgrl3	5.35298
Zdbf2	Bmpr2	Unc80	Plekhm3	Fam117b	Abi2			Sh3bgrl3	5.50742	Ddx56	2.82361	Rps3a1	8.06606	Sh3bgrl3	5.29073	Sox10	3.92829	Rps3a1	8.14175
Adam23	Fam117b	Rpe	Pikfyve	Abi2	Nrp2			Rps3a1	8.13843	Arglu1	3.71029	Setdb1	6.10805	Rps3a1	8.17672	Tsen34	3.15443	Setdb1	6.02629
Plekhm3	Abi2	Acadl	Map2	Nrp2	Adam23			Setdb1	6.12495	Pisd	2.90434	Homer2	7.83685	Setdb1	6.02769	Rbm18	4.1519	Homer2	7.97241
Idh1	Nrp2	Lancl1	Unc80	Zdbf2	Plekhm3			Homer2	8.09555	Atpif1	4.66177	Rab8b	1.56446	Homer2	7.85617	Mrps17	4.38796	Rab8b	1.33677
Pikfyve	Zdbf2	Erbb4	Rpe	Adam23	Unc80			Rab8b	1.2081	Acaa2	3.0534	Chd3	9.7514	Rab8b	1.6183	Dhx32	4.61244	Chd3	9.78293
Map2	Adam23	Atic	Erbb4	Creb1	Rpe			Chd3	9.90209	Usp3	3.2821	Fbxo33	5.28599	Chd3	9.69452	Mrps2	3.71786	Fbxo33	5.33625
Unc80	Pikfyve	Fn1	Atic	Idh1	Atic			Fbxo33	5.26806	Cpne5	2.39117	Rcbtb1	5.79609	Fbxo33	5.21987	Pin1	4.18119	Rcbtb1	5.8584
Rpe	Map2	Igfbp5	Fn1	Map2	Igfbp5			Rcbtb1	5.87926	Lrrc47	3.17227	Atxn7l3	7.0805	Rcbtb1	5.82341	Parvb	4.09147	Atxn7l3	7.03791
Lancl1	Unc80	Aamp	Xrcc5	Unc80	Aamp			Atxn7l3	7.30569	Lamtor2	2.82361	Serpine2	8.39687	Atxn7l3	7.10301	Zfp335	5.10041	Serpine2	8.54145
Erbb4	Rpe	Tmbim1	Igfbp5	Rpe	Pnkd			Serpine2	8.56456	Nfrkb	4.16	Plxnb1	8.11855	Serpine2	8.51143	Slc9a5	4.82532	Plxnb1	8.06871
Fn1	Erbb4	Zfp142	Arpc2	Acadl	Tmbim1			Plxnb1	8.15709	Brd1	4.02208	Gpr137	5.63854	Plxnb1	8.12389	Zfp26	6.02632	Gpr137	5.45256
Igfbp5	Atic	Atg9a	Aamp	Lancl1	Zfp142			Gpr137	5.66783	Pcbp3	3.38415	Zfr	8.62597	Gpr137	5.49822	Thap11	3.4714	Zfr	8.77625
Arpc2	Fn1	Tuba4a	Pnkd	Erbb4	Abcb6			Zfr	8.73622	Gnaz	4.16	Mbd2	5.5898	Zfr	8.66451	Cul4b	4.16173	Mbd2	5.49537
Aamp	Igfbp5	Dnajb2	Tmbim1	Atic	Tuba4a			Mbd2	5.62825	Syt10	4.81058	Mettl16	5.29882	Mbd2	5.52252	Rhbdl3	5.3357	Mettl16	5.28488
Tmbim1	Arpc2	Ptprn	Plcd4	Fn1	Dnajb2			Mettl16	5.29639	Inpp1	2.55016	Tmcc2	8.21262	Mettl16	5.46518	Mars	4.69599	Tmcc2	8.16798
Zfp142	Aamp	Chpf	Zfp142	Igfbp5	Ptprn			Tmcc2	8.41786	Myo5b	3.45286	Srxn1	5.41823	Tmcc2	8.12566	Plekhg5	2.72128	Srxn1	5.57451
Tuba4a	Pnkd	Stk11ip	Tuba4a	Arpc2	Chpf			Srxn1	5.55978	Ube2f	3.8391	Orc4	4.19273	Srxn1	5.50907	Ank1	2.5522	Orc4	4.14519
Dnajb2	Plcd4	Slc4a3	Dnajb2	Pnkd	Slc4a3			Orc4	3.91386	Zfp142	4.77345	Npy1r	6.00617	Orc4	4.15573	Sfswap	5.72858	Npy1r	5.92926
Ptprn	Abcb6	Epha4	Ptprn	Ctdsp1	Epha4			Npy1r	5.89787	Tbc1d1	4.20052	Prkaa2	5.86885	Npy1r	5.84712	Dlg1	4.6824	Prkaa2	5.99679
Chpf	Stk16	Scg2	Chpf	Plcd4	Farsb			Prkaa2	5.80035	Mif	2.8027	Pdcd6	4.68314	Prkaa2	5.87254	Timm8b	0.575067	Pdcd6	4.76603
Epha4	Tuba4a	Cul3	Stk11ip	Zfp142	Scg2			Pdcd6	4.74639	Ciz1	3.76537	Dhx8	5.46734	Pdcd6	4.69155	Mtf2	3.74427	Dhx8	5.38586
Farsb	Dnajb2	Mff	Slc4a3	Abcb6	Wdfy1			Dhx8	5.30757	Guk1	3.35572	Hsph1	7.80349	Dhx8	5.37319	Txndc11	5.15063	Hsph1	7.85932
Scg2	Ptprn	Dner	Epha4	Tuba4a	Rhbdd1			Hsph1	7.77203	Chuk	4.42918	Cdc37l1	4.87091	Hsph1	7.8423	Pcgf5	4.68921	Cdc37l1	5.10306
Cul3	Chpf	Trip12	Farsb	Dnajb2	Mff			Cdc37l1	5.04911	Bcar1	1.6354	Htr2c	7.36444	Cdc37l1	4.89546	Chchd3	5.96308	Htr2c	7.03791
Mff	Slc4a3	Slc16a14	Acsl3	Ptprn	Agfg1			Htr2c	7.06674	Dok4	2.59948	Wdr11	5.91123	Htr2c	7.04083	Camk2n2	3.98476	Wdr11	5.95796
Agfg1	Acsl3	Cab39	Scg2	Chpf	Trip12			Wdr11	5.60125	Pfkfb3	3.07099	Psmd7	5.75945	Wdr11	5.78822	Chpf2	5.99642	Psmd7	5.87933
Sphkap	Wdfy1	Ptma	Wdfy1	Slc4a3	Slc16a14			Psmd7	6.02352	Ublcp1	2.73809	Tmem9	5.79383	Psmd7	5.92613	Zfp597	4.97778	Tmem9	5.6222
Dner	Serpine2	Pde6d	Cul3	Epha4	Cab39			Tmem9	5.89231	Rab31	1.85441	Prrt3	5.7266	Tmem9	5.53052	Hmga1	3.74427	Prrt3	5.73878
Trip12	Cul3	Eif4e2	Rhbdd1	Wdfy1	Pde6d			Prrt3	5.75819	Fars2	3.42577	Bace1	7.46814	Prrt3	5.59303	Srsf3	3.92829	Bace1	7.25456
Slc16a14	Dner	Ngef	Mff	Cul3	Efhd1			Bace1	7.48316	Casp9	3.45286	Mga	7.74671	Bace1	7.23791	Wdr77	5.6781	Mga	7.76311
Cab39	Slc16a14	Atg16l1	Agfg1	Rhbdd1	Ngef			Mga	7.67124	Tasp1	1.5873	Fis1	5.86239	Mga	7.71047	Chka	5.01079	Fis1	5.60834
Itm2c	Cab39	Arl4c	Dner	Mff	Atg16l1			Fis1	5.72939	Tmem11	2.33402	Lgi4	5.68324	Fis1	5.73146	Eif4e3	4.41287	Lgi4	5.6737
Ncl	Itm2c	Sh3bp4	Trip12	Agfg1	Arl4c			Lgi4	5.76226	Tpcn1	2.52485	Bex2	6.09892	Lgi4	5.59812	Ufd1l	3.33904	Bex2	6.31965
Ptma	Ncl	Agap1	Slc16a14	Dner	Asb1			Bex2	6.13597	Nln	3.85949	Lin54	4.64347	Bex2	6.27333	Cbfb	5.34866	Lin54	4.89497
Eif4e2	Ptma	Cops8	Cab39	Trip12	Gpc1			Lin54	5.03236	Tbc1d17	2.71589	Wdr91	4.30506	Lin54	4.65783	Smad7	1.14991	Wdr91	4.59661
Ngef	Pde6d	Ube2f	Itm2c	Slc16a14	Stk25			Wdr91	4.48601	Cyb5r4	5.05561	Plec	8.08284	Wdr91	4.36724	Taf10	4.97778	Plec	7.89058
Atg16l1	Eif4e2	Asb1	Psmd1	Itm2c	Bok			Plec	8.06705	Heatr1	3.03559	Snhg11	10.2563	Plec	7.92563	Tmem189	4.28378	Snhg11	10.165
Arl4c	Ngef	Ndufa10	Armc9	Armc9	Cdh20			Snhg11	10.0645	Pdxk	5.48439	Acadvl	4.9864	Snhg11	10.2819	Adarb1	3.40674	Acadvl	4.99213
Sh3bp4	Atg16l1	Gpc1	Ncl	Ncl	Zcchc2			Acadvl	5.07223	Ddx19b	4.22431	Zcchc11	6.07675	Acadvl	4.97194	Pgp	3.97364	Zcchc11	6.21009
Agap1	Arl4c	Kif1a	Ptma	Dis3l2	Phlpp1			Zcchc11	6.03197	Gsta4	3.59341	Kcnip4	5.44155	Zcchc11	6.06676	Tox	4.89769	Kcnip4	5.42435
Cops8	Ube2f	Stk25	Pde6d	Ngef	Bcl2			Kcnip4	5.63935	Pik3c2b	3.71029	Rilpl1	4.85797	Kcnip4	5.5725	Dopey2	5.67123	Rilpl1	4.93994
Asb1	Asb1	Bok	Eif4e2	Arl4c	Kdsr			Rilpl1	4.77486	Ccdc124	2.98079	Fgfr3	7.01983	Rilpl1	4.87464	Srpk1	6.05298	Fgfr3	6.71464
Gpc1	Ndufa10	St8sia4	Ngef	Cops8	Dsel			Fgfr3	6.97769	Ablim3	3.75452	Nomo1	7.91442	Fgfr3	6.87464	Ddx56	4.31054	Nomo1	7.85873
Kif1a	Gpc1	Cdh20	Atg16l1	Ramp1	Tfcp2l1			Nomo1	7.99412	Katnb1	2.44613	Rnf41	5.49547	Nomo1	7.87149	Arglu1	5.18959	Rnf41	5.45875
Ppp1r7	Kif1a	Pign	Arl4c	Ube2f	Ptpn4			Rnf41	5.68507	Rtkn	1.97145	Ramp1	5.47301	Rnf41	5.55166	Pisd	4.37956	Ramp1	5.50737
Stk25	Ppp1r7	Zcchc2	Sh3bp4	Asb1	Dpp10			Ramp1	5.52189	Zfp382	2.55016	Rpl18	6.07489	Ramp1	5.58793	Atpif1	6.1276	Rpl18	5.98182
Bok	Stk25	Phlpp1	Agap1	Gpc1	Actr3			Rpl18	6.37124	Slc38a7	5.56421	Slc6a8	6.47731	Rpl18	6.09043	Acaa2	4.5161	Slc6a8	6.40232
St8sia4	Bok	Vps4b	Cops8	Kif1a	Slc35f5			Slc6a8	6.61343	Cdyl2	2.67045	Ank3	10.232	Slc6a8	6.4156	Usp3	4.72942	Ank3	10.1677
Cdh20	Pam	Tsn	Gpc1	Ppp1r7	Lypd1			Ank3	10.21	Wdr12	3.38415	Mib1	7.91858	Ank3	10.0666	Cpne5	3.83307	Mib1	8.00717
Zcchc2	Zcchc2	Clasp1	Kif1a	Hdlbp	Mgat5			Mib1	7.96087	Spag7	3.20451	Kif3c	7.68515	Mib1	7.96948	Lrrc47	4.61244	Kif3c	7.60734
Phlpp1	Phlpp1	Tfcp2l1	Ppp1r7	Stk25	Tmem163			Kif3c	7.80396	Fastk	2.75995	Rexo1	5.32413	Kif3c	7.63139	Lamtor2	4.25652	Rexo1	5.32612
Bcl2	Bcl2	Ptpn4	Stk25	Zcchc2	Ccnt2			Rexo1	5.60125	Tet2	5.28399	Sars	6.25184	Rexo1	5.29073	Nfrkb	5.58253	Sars	6.23917
Clasp1	Tfcp2l1	Dpp10	Bok	Phlpp1	Ubxn4			Sars	6.29044	Wdr6	4.8262	Ttll1	4.14381	Sars	6.2923	Brd1	5.44036	Ttll1	3.90322
Tfcp2l1	Lypd1	Actr3	St8sia4	Bcl2	Slc41a1			Ttll1	4.29142	Rnf5	4.43599	Srprb	4.5923	Ttll1	3.883	Pcbp3	4.80036	Srprb	4.17559
Insig2	Mgat5	Slc35f5	Cdh20	Tfcp2l1	Nucks1			Srprb	4.23983	Usp38	4.22431	Cx3cl1	9.65728	Srprb	4.4818	Gnaz	5.56041	Cx3cl1	9.649
Dpp10	Tmem163	Lypd1	Pign	Dbi	Elk4			Cx3cl1	9.69435	Kctd7	1.77075	Pigs	6.06928	Cx3cl1	9.56602	Syt10	6.21045	Pigs	6.06538
Lypd1	Ccnt2	Mgat5	Zcchc2	Actr3	Tmcc2			Pigs	6.05703	Rab8b	1.19651	Hs3st2	3.84473	Pigs	6.06676	Inpp1	3.93976	Hs3st2	3.2759
Tmem163	Ubxn4	Tmem163	Phlpp1	Lypd1	Cntn2			Hs3st2	3.3694	Ndufc1	2.47285	Slc7a4	6.27961	Hs3st2	3.22973	Myo5b	4.83763	Slc7a4	6.07145
Ccnt2	Yod1	Ubxn4	Bcl2	Mgat5	Nfasc			Slc7a4	6.10266	F3	3.89943	Cisd2	5.56347	Slc7a4	6.25734	Ube2f	5.21342	Cisd2	5.62496
R3hdm1	Mapkapk2	Srgap2	Vps4b	Tmem163	Lrrn2			Cisd2	5.59214	Armc9	3.86958	Hnrnpa2b1	7.02756	Cisd2	5.50907	Zfp142	6.14505	Hnrnpa2b1	7.15793
Ubxn4	Srgap2	Elk4	Cdh7	Ccnt2	Mdm4			Hnrnpa2b1	6.88652	Gclc	4.65011	Bpgm	5.80511	Hnrnpa2b1	7.05293	Tbc1d1	5.56782	Bpgm	5.74132
Yod1	Slc41a1	Tmcc2	Dsel	R3hdm1	Ppp1r15b			Bpgm	5.77238	Rab33b	4.36645	Rlim	7.14939	Bpgm	5.70104	Mif	4.16173	Rlim	7.1455
Mapkapk2	Elk4	Dstyk	Tfcp2l1	Ubxn4	Prelp			Rlim	7.07494	Pcgf3	4.85187	Nckap1l	3.85345	Rlim	7.21076	Ciz1	5.11059	Nckap1l	3.95672
Srgap2	Tmcc2	Cntn2	Ccdc93	Pfkfb2	Adipor1			Nckap1l	3.68442	Exoc8	4.04897	Ap1g1	6.48153	Nckap1l	3.78822	Guk1	4.68921	Ap1g1	6.57763
Slc41a1	Cntn2	Nfasc	Slc35f5	Mapkapk2	Kdm5b			Ap1g1	6.51198	Ints7	3.84933	Fbxo45	5.82076	Ap1g1	6.4749	Chuk	5.76127	Fbxo45	5.93593
Nucks1	Nfasc	Lrrn2	Lypd1	Slc41a1	Syt2			Fbxo45	5.92716	Samd12	3.12252	Zfp592	5.845	Fbxo45	5.90165	Bcar1	2.96532	Zfp592	5.849
Elk4	Lrrn2	Ppp1r15b	Tmem163	Nucks1	Ppp1r12b			Zfp592	6.07513	Rcn2	1.5873	Paf1	5.06358	Zfp592	5.86834	Dok4	3.92829	Paf1	5.06702
Tmcc2	Ppp1r15b	Atp2b4	Ccnt2	Elk4	Arl8a			Paf1	5.25368	Gmcl1	4.31569	Scaf1	7.05049	Paf1	4.97585	Pfkfb3	4.39631	Scaf1	7.00443
Dstyk	Atp2b4	Fmod	Ubxn4	Tmcc2	Gpr37l1			Scaf1	7.17599	Rfng	3.42577	Il34	4.68802	Scaf1	7.085	Ublcp1	4.06028	Il34	4.69435
Rbbp5	Prelp	Adipor1	Pfkfb2	Dstyk	Rnpep			Il34	4.70894	Rnpep	3.25156	Prickle1	6.07302	Il34	4.66269	Rab31	3.174	Prickle1	6.07951
Cntn2	Fmod	Rabif	Yod1	Cntn2	Ipo9			Prickle1	6.06363	Zfp316	3.95734	Csrnp3	7.0962	Prickle1	6.09043	Fars2	4.73602	Csrnp3	7.24831
Nfasc	Adora1	Kdm5b	Mapkapk2	Nfasc	Tmem9			Csrnp3	7.22619	Rnf146	5.47451	Fn1	8.81248	Csrnp3	7.18478	Casp9	4.7621	Fn1	8.66781
Lrrn2	Adipor1	Syt2	Slc41a1	Lrrn2	Camsap2			Fn1	8.27853	Clk1	3.51845	Emc7	6.07861	Fn1	8.77284	Tasp1	2.89634	Emc7	6.04081
Mdm4	Rabif	Ppp1r12b	Nucks1	Pik3c2b	Zfp281			Emc7	6.02013	Ppil4	4.57811	Rhot1	6.25349	Emc7	6.0594	Tmem11	3.6356	Rhot1	6.31454
Ppp1r15b	Kdm5b	Arl8a	Elk4	Ppp1r15b	Zbtb41			Rhot1	6.16083	Zc3h7a	2.99929	Trim9	8.28651	Rhot1	6.30636	Tpcn1	3.82071	Ythdf3	0.900234
Atp2b4	Syt2	Rnpep	Tmcc2	Prelp	Kcnt2			Trim9	8.39216	Rtn4rl2	4.31569	Irak1	4.66344	Trim9	8.3048	Nadk2	0.688216	Trim9	8.30622
Prelp	Ppp1r12b	Shisa4	Dstyk	Fmod	Cdc73			Irak1	4.62654	Dnajc11	4.92626	Slc17a7	10.2005	Irak1	4.66269	Nln	5.13575	Irak1	4.56825
Fmod	Arl8a	Ipo9	Rbbp5	Adora1	Glrx2			Slc17a7	10.307	Senp7	4.46954	N4bp1	6.36897	Slc17a7	10.1017	Nup88	2.09938	Slc17a7	10.1546
Adora1	Timm17a	Tmem9	Cntn2	Adipor1	Ptgs2			N4bp1	6.27058	Sec23ip	3.91899	Tmem179	6.46598	N4bp1	6.30946	Tbc1d17	3.97364	N4bp1	6.3483
Adipor1	Shisa4	Camsap2	Nfasc	Rabif	Ivns1abp			Tmem179	6.53713	Npat	4.65595	Gatsl2	6.92375	Tmem179	6.28915	Cyb5r4	6.30884	Tmem179	6.23737
Rabif	Ipo9	Zfp281	Lrrn2	Syt2	Rnf2			Gatsl2	6.95743	Xpo4	3.25156	Erc2	7.66486	Gatsl2	6.87044	Heatr1	4.27475	Gatsl2	6.85745
Kdm5b	Csrp1	Zbtb41	Mdm4	Ppp1r12b	Edem3			Erc2	7.68631	Tcp11l1	4.55954	Rtn2	5.67096	Erc2	7.80097	Pdxk	6.72152	Erc2	7.85756
Syt2	Tmem9	B3galt2	Pik3c2b	Arl8a	1700025G04Rik			Rtn2	5.883	Otud5	1.06221	Dnaja2	6.7219	Rtn2	5.64067	Ddx19b	5.45642	Rtn2	5.67902
Ppp1r12b	Kif21b	Glrx2	Ppp1r15b	Gpr37l1	Rgl1			Dnaja2	6.71976	Kctd3	5.10341	Nipal3	6.72546	Dnaja2	6.7407	Gsta4	4.81912	Dnaja2	6.71593
Arl8a	Camsap2	Rgs2	Fmod	Shisa4	Arpc5			Nipal3	6.89303	Osbp2	5.12041	Tsc1	6.55553	Nipal3	6.61705	Pik3c2b	4.92681	Nipal3	6.64572
Gpr37l1	Zfp281	Ptgs2	Tmem183a	Ipo9	Dhx9			Tsc1	6.42612	Gpr88	4.72426	Gpx3	2.74478	Tsc1	6.52386	Ccdc124	4.19083	Tsc1	6.40714
Shisa4	Nek7	Edem3	Adipor1	Tmem9	Rgs8			Gpx3	2.89347	Ssh1	4.07536	Rpl41	-0.528793	Gpx3	2.14881	Ablim3	4.96099	Gpx3	2.56499
Ipo9	Zbtb41	1700025G04Rik	Klhl12	Zfp281	Cacna1e			Rpl41	-0.354911	Mapk8	5.45118	Rnf24	5.7478	Rpl41	-0.381723	Katnb1	3.64964	Rpl41	-0.44257
Csrp1	B3galt2	Rgl1	Rabif	Zbtb41	Ier5			Rnf24	5.80627	Ciapin1	3.69902	Rragd	6.19466	Rnf24	5.56472	Rtkn	3.174	Rnf24	5.57165
Kif21b	Cdc73	Arpc5	Syt2	Cfh	Qsox1			Rragd	6.10907	Dtnbp1	3.42577	Rragc	5.75945	Rragd	6.10122	Zfp382	3.74427	Rragd	6.27647
Camsap2	Glrx2	Smg7	Ppp1r12b	B3galt2	Tor1aip1			Rragc	5.73354	Nr2e1	3.74359	Fkbp1a	3.57637	Rragc	5.7703	Slc38a7	6.75762	Rragc	5.74386
Zfp281	Rgs2	Dhx9	Arl8a	Cdc73	Tor1aip2			Fkbp1a	3.39058	Nfkbia	3.17227	Phyhipl	7.19384	Fkbp1a	3.62828	Cdyl2	3.85747	Fkbp1a	3.68809
Zbtb41	Ptgs2	Rgs8	Gpr37l1	Rgs2	Abl2			Phyhipl	7.23353	Cep290	4.65595	Ndufb9	6.37807	Phyhipl	7.27174	Wdr12	4.56877	Phyhipl	7.31385
Cfh	Edem3	Cacna1e	Timm17a	Ivns1abp	Fam20b			Ndufb9	6.48515	Pms1	3.85949	Sptbn2	10.0597	Ndufb9	6.32643	Spag7	4.38796	Ndufb9	6.19162
B3galt2	Rgl1	Ier5	Shisa4	Edem3	Brinp2			Sptbn2	10.1176	Arl4a	4.18445	Tpst1	5.86454	Sptbn2	9.84016	Fastk	3.93976	Sptbn2	9.96829
Glrx2	Arpc5	Xpr1	Ipo9	1700025G04Rik	Rabgap1l			Tpst1	5.78643	Prcc	3.35572	Utp15	4.4269	Tpst1	5.61077	Tet2	6.4599	Tpst1	5.62496
Rnf2	Smg7	Qsox1	Csrp1	Rgl1	Dars2			Utp15	4.84175	Mcu	4.12673	Cnot6	5.57406	Utp15	4.73378	Wdr6	6.0019	Utp15	4.67851
Edem3	Dhx9	Tor1aip2	Kif21b	Smg7	Dnm3			Cnot6	5.62825	Rnf185	2.92384	Nde1	5.10067	Cnot6	5.64313	Rnf5	5.61151	Cnot6	5.67103
1700025G04Rik	Glul	Abl2	Camsap2	Dhx9	Vamp4			Nde1	5.27377	Utp3	2.92384	Gnl3l	7.66919	Nde1	5.22645	Usp38	5.3994	Nde1	5.0466
Rgl1	Cacna1e	Brinp2	Zfp281	Rgs8	Prrc2c			Gnl3l	7.66038	Tubb2a	5.78282	Taf10	4.84053	Gnl3l	7.76069	Kctd7	2.94269	Gnl3l	7.68006
Arpc5	Ier5	Mrps14	Nek7	Glul	Kifap3			Taf10	4.75049	Brpf1	3.97613	Nras	6.52311	Taf10	4.86623	Rab8b	2.36066	Taf10	4.87658
Nmnat2	Xpr1	Dnm3	Cfh	Cacna1e	Atp1b1			Nras	6.3739	Ppard	3.60554	Mapk14	5.85155	Nras	6.24927	Ndufc1	3.6356	Nras	6.43725
Dhx9	Qsox1	Vamp4	B3galt2	Ier5	Mpzl1			Mapk14	5.78243	Sh3glb2	4.22431	Midn	3.78217	Mapk14	5.69155	F3	5.05366	Mapk14	5.71569
Rgs8	Tor1aip2	Prrc2c	Cdc73	Xpr1	Ildr2			Midn	4.08603	Cops3	4.13512	Ss18	5.1404	Midn	4.04083	Armc9	5.02163	Midn	3.88493
Cacna1e	Tor1aip1	Atp1b1	Glrx2	Qsox1	Pogk			Ss18	5.24789	Med22	2.44613	Rpl37a	7.56222	Ss18	5.09943	Gclc	5.7964	Ss18	4.89953
Ier5	Abl2	Dcaf6	Ptgs2	Tor1aip1	Fam78b			Rpl37a	7.76394	Ankmy2	3.8391	Glul	11.7805	Rpl37a	7.58537	Rab33b	5.50357	Rpl37a	7.7334
Qsox1	Ralgps2	Mpzl1	Tpr	Tor1aip2	Uck2			Glul	11.8492	Znhit1	2.00845	Ap1s2	5.49547	Glul	11.8693	Pcgf3	5.98816	Glul	11.8233
Tor1aip1	Brinp2	Ildr2	Ivns1abp	Soat1	Tmco1			Ap1s2	5.29358	Irf2bp1	2.11406	Kazn	5.69542	Ap1s2	5.56472	Exoc8	5.18478	Ap1s2	5.53695
Tor1aip2	Astn1	Pogk	Edem3	Abl2	Aldh9a1			Kazn	5.43281	Trnp1	4.60252	Atp5f1	6.97058	Kazn	5.49822	Ints7	4.98333	Kazn	5.418
Abl2	Cacybp	Fam78b	1700025G04Rik	Fam20b	Pbx1			Atp5f1	7.03598	Xab2	2.30458	Ndufb4	5.2763	Atp5f1	7.1436	Samd12	4.25652	Atp5f1	7.21302
Fam20b	Rabgap1l	Uck2	Rgl1	Brinp2	Nos1ap			Ndufb4	5.53622	Ccnt2	6.19552	Dpy19l3	7.09712	Ndufb4	5.43706	Rcn2	2.72128	Ndufb4	5.37934
Brinp2	Dars2	Aldh9a1	Arpc5	Mrps14	Adamts4			Dpy19l3	7.04436	Tle3	4.00388	Sorcs2	7.1414	Dpy19l3	7.00008	Gmcl1	5.44841	Dpy19l3	7.01392
Astn1	Ankrd45	Pbx1	Dhx9	Cacybp	Usp21			Sorcs2	7.18359	Mapkbp1	4.76266	Sf3a1	6.12616	Sorcs2	7.14447	Rfng	4.55392	Sorcs2	7.19272
Cacybp	Prdx6	Uhmk1	Cacna1e	Rabgap1l	Dedd			Sf3a1	6.00819	Nub1	5.25734	Akt2	6.60025	Sf3a1	6.02769	Rnpep	4.37956	Sf3a1	6.12502
Dars2	Dnm3	Nos1ap	Ier5	Prdx6	Pfdn2			Akt2	6.7061	Smarcd3	3.17227	Calu	7.23863	Akt2	6.6784	Zfp316	5.08499	Akt2	6.54598
Dnm3	Prrc2c	Adamts4	Qsox1	Prrc2c	Dcaf8			Calu	7.2328	Rbm4	3.1393	Il33	5.66355	Calu	7.31334	Rnf146	6.59663	Calu	7.28625
Prrc2c	Kifap3	Usp21	Tor1aip1	Atp1b1	Pea15a			Il33	5.68935	Pwp2	1.89449	Pdzd8	6.99542	Il33	5.64313	Clk1	4.63378	Il33	5.64411
Kifap3	Atp1b1	Dcaf8	Tor1aip2	Dcaf6	Igsf8			Pdzd8	7.15448	Eml4	4.68481	Sepp1	8.83301	Pdzd8	6.92208	Ppil4	5.69173	Pdzd8	6.95926
Blzf1	Mpzl1	Pea15a	Abl2	Mpzl1	Pigm			Sepp1	8.81984	Nek6	4.14346	Pkd1	7.41243	Sepp1	8.81552	Zc3h7a	4.1119	Sepp1	8.8316
Atp1b1	Creg1	Atp1a2	Fam20b	Ildr2	Ackr1			Pkd1	7.38104	Nenf	3.54387	Eif4a2	8.72669	Pkd1	7.23628	Rtn4rl2	5.42411	Pkd1	7.32491
Dcaf6	Ildr2	Igsf8	Brinp2	Pogk	Fmn2			Eif4a2	8.7755	Rprm	1.5873	Cpne3	5.39154	Eif4a2	8.78041	Dnajc11	6.02901	Eif4a2	8.8157
Mpzl1	Pogk	Pigm	Mrps14	Fam78b	Grem2			Cpne3	5.27661	Ppp1r13b	5.39292	Pja2	8.9274	Cpne3	5.56732	Senp7	5.56782	Cpne3	5.46184
Creg1	Fam78b	Fmn2	Rabgap1l	Tmco1	Rgs7			Pja2	8.96546	Kif3b	5.42063	Nup205	5.28277	Pja2	9.04457	Sec23ip	5.01622	Pja2	9.12777
Ildr2	Pbx1	Grem2	Rc3h1	Aldh9a1	Zbtb18			Nup205	5.05575	Dtnb	3.45286	Gfod1	7.21091	Nup205	5.14534	Npat	5.74502	Nup205	5.15739
Pogk	Rgs4	Rgs7	Dnm3	Mgst3	Hnrnpu			Gfod1	7.4189	Tpp2	3.53122	Syt12	5.12967	Gfod1	7.10391	Xpo4	4.33681	Gfod1	7.2958
Fam78b	Uhmk1	Akt3	Prrc2c	Pbx1	Smyd3			Syt12	5.11422	Ptpn12	4.37355	Ppp1r15a	3.13639	Syt12	5.03709	Tcp11l1	5.64344	Syt12	5.09115
Uck2	Nos1ap	Zbtb18	Kifap3	Rgs5	Sccpdh			Ppp1r15a	3.29272	Akap8l	4.70749	Dpy19l4	6.33979	Ppp1r15a	2.44837	Otud5	2.13973	Ppp1r15a	2.73794
Aldh9a1	Adamts4	Hnrnpu	Slc19a2	Rgs4	Cdc42bpa			Dpy19l4	6.19284	Naa60	2.98079	Rac1	8.07681	Dpy19l4	6.36873	Kctd3	6.17933	Dpy19l4	6.29563
Mgst3	B4galt3	Sccpdh	Atp1b1	Hsd17b7	Stum			Rac1	8.12467	Tmem55b	4.2477	Acly	6.99935	Rac1	8.11593	Osbp2	6.19617	Rac1	8.10322
Pbx1	Pex19	Cdc42bpa	Sft2d2	Uhmk1	Acbd3			Acly	6.97331	Ufl1	5.02434	C2cd2l	7.27072	Acly	6.98753	Gpr88	5.79955	Acly	7.05334
Uap1	Dcaf8	Stum	Tiprl	Atf6	Cnih4			C2cd2l	7.32644	Prkar2b	3.62948	Dcaf11	1.96928	C2cd2l	7.09943	Ssh1	5.14569	C2cd2l	7.13394
Nos1ap	Pea15a	Acbd3	Dcaf6	Ndufs2	Wdr26			Dcaf11	2.33956	Snx4	4.2477	Rasgrp1	9.12892	Dcaf11	2.22973	Mapk8	6.52036	Dcaf11	2.1713
Ndufs2	Atp1a2	Cnih4	Mpzl1	Adamts4	Enah			Rasgrp1	9.18857	Metap1	2.64718	Cx3cr1	6.61315	Rasgrp1	9.11015	Ciapin1	4.75563	Rasgrp1	9.19332
Adamts4	Igsf8	Wdr26	Creg1	Ufc1	Srp9			Cx3cr1	6.48022	Zfp788	5.04229	Gnl1	6.42123	Cx3cr1	6.75785	Dtnbp1	4.47727	Cx3cr1	6.57335
B4galt3	Pigm	Enah	Ildr2	Dedd	Fbxo28			Gnl1	6.79118	Sntg1	6.113	Epha5	8.10902	Gnl1	6.54641	Nr2e1	4.79406	Gnl1	6.48507
Pfdn2	Ackr1	Capn2	Pogk	Pfdn2	Capn2			Epha5	8.10919	Mid2	4.93108	Unc13a	8.37622	Epha5	8.04689	Nfkbia	4.21935	Epha5	8.08732
Usf1	Cadm3	Iars2	Fam78b	Usf1	Susd4			Unc13a	8.47908	Tbc1d13	3.49257	Pcm1	7.74143	Unc13a	8.34395	Cep290	5.70187	Unc13a	8.35145
Ncstn	Fmn2	Tgfb2	Uck2	Ncstn	Rab3gap2			Pcm1	7.70703	Rars	3.72148	Rab3c	8.85624	Pcm1	7.68319	Pms1	4.90356	Pcm1	7.84106
Pex19	Grem2	Esrrg	Pbx1	Pea15a	Esrrg			Rab3c	8.80192	Tmod3	3.88955	Atp6v0a1	9.35336	Rab3c	8.84445	Arl4a	5.22753	Rab3c	8.86376
Dcaf8	Rgs7	Kctd3	Uap1	Atp1a2	Kctd3			Atp6v0a1	9.33198	Ust	2.71589	Mmp14	5.20655	Atp6v0a1	9.2244	Prcc	4.39631	Atp6v0a1	9.22796
Pea15a	Zbtb18	Kcnk2	Uhmk1	Igsf8	Prox1			Mmp14	4.96336	Kdm1a	4.56576	Gnl2	5.22683	Mmp14	4.99527	Mcu	5.16537	Mmp14	4.98356
Atp1a2	Hnrnpu	Smyd2	Nos1ap	Kcnj10	Rps6kc1			Gnl2	4.96336	Pdik1l	3.71029	Fuca2	6.04475	Gnl2	5.01443	Rnf185	3.96243	Gnl2	5.24243
Igsf8	Sccpdh	Prox1	Adamts4	Pigm	Angel2			Fuca2	5.88487	Nr4a1	3.35572	Eri3	6.26006	Fuca2	5.85139	Utp3	3.96243	Fuca2	5.94036
Kcnj10	Cdc42bpa	Rps6kc1	B4galt3	Ackr1	Nenf			Eri3	6.34977	Micu1	5.3611	Atad1	7.43512	Eri3	6.27968	Tubb2a	6.81481	Eri3	6.21559
Pigm	Stum	Ppp2r5a	Usp21	Cadm3	Ppp2r5a			Atad1	7.507	Rasa3	5.39641	Sobp	6.75601	Atad1	7.4575	Brpf1	5.00534	Atad1	7.446
Cadm3	Acbd3	Kcnh1	Pfdn2	Fmn2	Lpgat1			Sobp	6.86114	Fkbp1a	3.15588	Usp19	6.43	Sobp	6.71399	Ppard	4.63378	Sobp	6.69772
Fmn2	Cnih4	Plxna2	Pex19	Grem2	Kcnh1			Usp19	6.38185	Snx17	3.81841	Mef2d	6.9144	Usp19	6.50772	Sh3glb2	5.25074	Usp19	6.47594
Grem2	Wdr26	Syne1	Dcaf8	Rgs7	Plxna2			Mef2d	7.14282	Pum2	2.41891	Sos2	6.06366	Mef2d	6.89959	Cops3	5.16047	Mef2d	6.93947
Akt3	Cnih3	Ipcef1	Pea15a	Zbtb18	Cd34			Sos2	6.02522	Nkain4	4.22431	Nol4	6.17741	Sos2	6.00296	Med22	3.4714	Sos2	6.04905
Zbtb18	Enah	Lats1	Igsf8	Hnrnpu	Ppp1r14c			Nol4	6.25911	Kcnmb4	4.33038	Gldc	6.00812	Nol4	6.22152	Ankmy2	4.86196	Nol4	6.24635
Adss	Capn2	Ppil4	Pigm	Sccpdh	Plekhg1			Gldc	6.09139	Nxf1	4.79478	Wipf1	5.10798	Gldc	6.17289	Znhit1	3.03115	Gldc	6.10738
Hnrnpu	Susd4	Tab2	Cadm3	Cdc42bpa	Akap12			Wipf1	4.94558	Mios	4.83138	Prox1	6.59636	Wipf1	5.06309	Phc3	3.03115	Wipf1	4.97061
Sccpdh	Brox	Ust	Fmn2	Stum	Syne1			Prox1	6.62799	Zfp563	3.08837	Pcdhb19	4.97046	Prox1	6.6784	Irf2bp1	3.13461	Prox1	6.72238
Cdc42bpa	Mark1	Sash1	Grem2	Parp1	Vip			Pcdhb19	4.9348	Nup188	2.73809	Vps4a	5.80061	Pcdhb19	4.85352	Trnp1	5.62223	Pcdhb19	4.72551
Stum	Tgfb2	Stxbp5	Rgs7	Acbd3	Ipcef1			Vps4a	5.78843	Parp11	3.74359	Rock2	7.75138	Vps4a	5.86412	Xab2	3.32161	Vps4a	5.89996
Acbd3	Esrrg	Fbxo30	Zbtb18	Cnih4	Tab2			Rock2	7.73576	Zfp207	4.71869	Cdo1	3.75451	Rock2	7.77929	Ccnt2	7.20896	Rock2	7.79896
Cnih4	Kcnk2	Utrn	Hnrnpu	Wdr26	Ust			Cdo1	3.87682	Tank	2.67045	Zdhhc14	5.58195	Cdo1	3.7703	Tle3	5.01622	Cdo1	3.90322
Wdr26	Smyd2	Fuca2	Smyd3	Cnih3	Sash1			Zdhhc14	5.61706	Coro7	4.02208	Wnk3	6.29889	Zdhhc14	5.51177	Mapkbp1	5.77415	Zdhhc14	5.66569
Enah	Prox1	Aig1	Sccpdh	Srp9	Stxbp5			Wnk3	6.3128	Errfi1	4.04006	Mfsd6	7.65242	Wnk3	6.22973	Nub1	6.26846	Wnk3	6.44819
Capn2	Rps6kc1	Hivep2	Cdc42bpa	Degs1	Shprh			Mfsd6	7.71177	Celf3	2.86454	Wdr18	4.5607	Mfsd6	7.52185	Smarcd3	4.18119	Mfsd6	7.47989
Susd4	Nenf	Heca	Stum	Fbxo28	Fbxo30			Wdr18	4.59495	Tbcb	3.74359	Kidins220	9.2177	Wdr18	4.454	Rbm4	4.142	Wdr18	4.42375
Brox	Ppp2r5a	Ahi1	Acbd3	Capn2	Utrn			Kidins220	9.23194	Rnf180	3.47946	Palm	7.20836	Kidins220	9.16284	Pwp2	2.89634	Kidins220	9.08986
Rab3gap2	Lpgat1	Sgk1	Cnih4	Susd4	Phactr2			Palm	7.54587	Grin2c	4.55954	Pgap1	6.70514	Palm	7.12257	Eml4	5.68493	Palm	7.19179
Iars2	Kcnh1	Tbpl1	Wdr26	Brox	Fuca2			Pgap1	6.61455	Ubap1	4.55954	Tmem25	5.43575	Pgap1	6.68797	Nek6	5.14073	Pgap1	6.66594
Bpnt1	Plxna2	Stx7	Enah	Bpnt1	Hivep2			Tmem25	5.46562	Tbck	5.17024	Eif3e	6.07489	Tmem25	5.21656	Nenf	4.53891	Tmem25	5.26381
Kctd3	Cd34	Moxd1	Srp9	Tgfb2	Heca			Eif3e	6.11385	Gak	5.52963	Bhlhe40	6.52037	Eif3e	6.20493	Rprm	2.5818	Eif3e	6.11916
Kcnk2	Syne1	Epb41l2	Capn2	Kctd3	Nhsl1			Bhlhe40	6.51921	Sgtb	5.06442	Sos1	6.84396	Bhlhe40	6.36127	Ppp1r13b	6.38634	Bhlhe40	6.50915
Ptpn14	Lrp11	Ncoa7	Kctd3	Smyd2	Bclaf1			Sos1	6.82172	Cnrip1	4.90679	Scoc	6.61443	Sos1	6.81251	Kif3b	6.41334	Sos1	6.86096
Smyd2	Tab2	Tspyl1	Kcnk2	Prox1	Ahi1			Scoc	6.47775	Ankrd52	5.08188	Apc	10.0967	Scoc	6.75785	Dtnb	4.44543	Scoc	6.763
Prox1	Ust	Tspyl4	Smyd2	Rps6kc1	Hbs1l			Apc	10.1476	Wars	4.60855	Gltp	5.17907	Apc	10.0724	Tpp2	4.52374	Apc	10.1336
Rps6kc1	Sash1	Marcks	Prox1	Nenf	Sgk1			Gltp	5.25368	Upf2	6.01869	Slc7a11	7.41169	Gltp	5.18984	Ptpn12	5.36578	Gltp	4.99213
Angel2	Stxbp5	Fyn	Rps6kc1	Ppp2r5a	Stx7			Slc7a11	6.98554	Erf	2.39117	Sirt3	4.7265	Slc7a11	7.32489	Akap8l	5.69173	Slc7a11	7.39926
Ppp2r5a	Utrn	Cdk19	Angel2	Lpgat1	Epb41l2			Sirt3	4.72987	Sertad2	4.55954	Cox6a1	6.72784	Sirt3	4.64805	Ankib1	2.17898	Sirt3	4.81514
Lpgat1	Phactr2	Cdc40	Nenf	Plxna2	L3mbtl3			Cox6a1	6.95743	Zbtb22	2.44613	Ganab	0.381633	Cox6a1	6.73146	Naa60	3.96243	Cox6a1	6.6646
Kcnh1	Fuca2	Wasf1	Ppp2r5a	Ppp1r14c	Rnf146			Ganab	0.310856	Gpatch11	3.90924	Vamp4	6.11532	Ganab	0.971928	Tmem55b	5.22753	Vamp4	6.38779
Plxna2	Hivep2	Fig4	Ints7	Syne1	Ncoa7			Vamp4	6.14534	Frmpd3	3.08837	Gps1	5.65359	Vamp4	6.26055	Ufl1	6.0019	Gps1	5.71569
Ppp1r14c	Reps1	Sesn1	Lpgat1	Lrp11	Nkain2			Gps1	5.89417	Cyth3	3.74359	Creg2	7.72964	Gps1	5.79489	Prkar2b	4.60525	Creg2	7.63973
Plekhg1	Ahi1	Foxo3	Kcnh1	Tab2	Rwdd1			Creg2	7.58199	Thoc7	2.27452	Gramd1b	8.05476	Creg2	7.4989	Snx4	5.22284	Gramd1b	8.10025
Akap12	Stx7	Snx3	Plxna2	Ust	Tspyl1			Gramd1b	8.11755	Wrnip1	3.50557	Shank1	10.6288	Gramd1b	8.02958	Metap1	3.62142	Shank1	10.5656
Syne1	Epb41l2	Nr2e1	Syne1	Sash1	Tspyl4			Shank1	10.9503	Zfp146	4.52165	Mkrn2	4.54464	Shank1	10.5006	Zfp788	6.01552	Mkrn2	4.56825
Rgs17	L3mbtl3	Ostm1	Ipcef1	Shprh	Marcks			Mkrn2	4.73402	Ankrd50	5.07318	Spryd3	5.78929	Mkrn2	4.59303	Sntg1	7.08529	Spryd3	5.65494
Lrp11	Ptprk	Sec63	Pcmt1	Fbxo30	Fyn			Spryd3	5.88487	Rbm14	2.11406	Ankrd28	6.35523	Spryd3	5.74529	Mid2	5.90281	Ankrd28	6.42938
Pcmt1	Rnf146	Sobp	Tab2	Utrn	Rev3l			Ankrd28	6.36189	Dnlz	3.39816	Papd7	5.67096	Ankrd28	6.50637	Tbc1d13	4.46143	Papd7	5.53987
Lats1	Ncoa7	Hace1	Sash1	Aig1	Cdk19			Papd7	5.65256	Zfp523	4.52165	Stk11	2.54396	Papd7	5.51177	Rars	4.68921	Stk11	2.92852
Tab2	Tspyl1	Ascc3	Stxbp5	Hivep2	Cdc40			Stk11	2.07754	Ankrd45	4.30086	Nxph3	4.43853	Stk11	2.5569	Tmod3	4.85592	Nxph3	3.78001
Ust	Tspyl4	Gopc	Shprh	Vta1	Wasf1			Nxph3	4.14331	Tcf12	6.31108	Camk2n2	4.88374	Nxph3	3.7971	Ust	3.67731	Camk2n2	4.76103
Sash1	Marcks	Nus1	Utrn	Reps1	Fig4			Camk2n2	4.98092	Dzip1	0.990059	Lrrc49	5.53936	Camk2n2	4.81906	Kdm1a	5.52657	Lrrc49	5.67902
Stxbp5	Fyn	Slc35f1	Fuca2	Bclaf1	Sesn1			Lrrc49	5.43536	Syngap1	6.85886	Mgat2	5.33662	Lrrc49	5.59048	Pdik1l	4.66867	Mgat2	5.22799
Shprh	Cdk19	Hsf2	Hivep2	Ahi1	Foxo3			Mgat2	5.19168	Exoc6	4.87209	Mapk1	8.87322	Mgat2	5.22316	Nr4a1	4.31054	Arhgap1	1.22492
Fbxo30	Wasf1	Gcc2	Vta1	Sgk1	Snx3			Arhgap1	0.62866	Ctdp1	3.08837	Dnlz	4.80051	Arhgap1	0.255715	Micu1	6.31546	Mapk1	8.95395
Utrn	Foxo3	Ranbp2	Heca	Moxd1	Nr2e1			Mapk1	8.94949	Ksr1	5.18647	Cldn10	5.41529	Mapk1	8.96728	Rasa3	6.34811	Dnlz	4.60781
Phactr2	Snx3	Dnajb12	Reps1	Med23	Sec63			Dnlz	4.84559	Ywhag	2.69335	Tbc1d30	5.70509	Dnlz	4.6382	Fkbp1a	4.10172	Cldn10	5.37279
Fuca2	Sec63	Spock2	Ahi1	L3mbtl3	Prep			Cldn10	5.42256	Orc4	2.99929	Mtch1	5.51208	Cldn10	5.39089	BC031181	-0.1811	Tbc1d30	5.3563
Hivep2	Sobp	Slc29a3	Hbs1l	Ptprk	Grik2			Tbc1d30	5.40706	Btrc	5.47781	Pls1	3.92137	Tbc1d30	5.50907	Snx17	4.7621	Mtch1	5.58587
Heca	Atg5	Unc5b	Sgk1	Ncoa7	Ascc3			Mtch1	5.59442	Fopnl	1.25925	B4galt6	7.96156	Mtch1	5.58023	Pum2	3.35626	Pls1	3.82865
Reps1	Grik2	Eif4ebp2	Moxd1	Nkain2	Gopc			Pls1	3.83107	Ist1	4.16819	Hs6st3	5.09701	Pls1	3.90781	Nkain4	5.16047	B4galt6	7.9462
Nhsl1	Nus1	Ppa1	Med23	Tspyl1	Nus1			B4galt6	7.95021	Sik1	2.86454	Npc2	6.33979	B4galt6	7.81743	Kcnmb4	5.26449	Hs6st3	4.68381
Bclaf1	Slc35f1	Ddx21	Epb41l2	Tspyl4	Slc35f1			Hs6st3	5.10784	Dpysl4	3.51845	Fads1	8.93306	Hs6st3	4.93621	Nxf1	5.72526	Npc2	6.28869
Ahi1	Gja1	Ccar1	Rnf146	Marcks	Gja1			Npc2	6.39501	Pan3	5.06881	Flot2	5.84063	Npc2	6.19153	Mios	5.76127	Fads1	9.03521
Hbs1l	Gcc2	Rufy2	Nkain2	Fyn	Lims1			Fads1	9.05275	Ralyl	1.97145	Brd8	5.77789	Fads1	9.03568	Zfp563	4.01761	Flot2	5.80105
Sgk1	Ranbp2	Lrrtm3	Tspyl1	Cdk19	Dnajb12			Flot2	6.07676	Ipo13	4.59645	Kctd2	4.87947	Flot2	6.02769	Nup188	3.66354	Brd8	5.79616
Ptprk	Dnajb12	Jmjd1c	Tspyl4	Cdc40	Ddit4			Brd8	5.89972	Elmo1	5.8275	Gria4	6.06741	Brd8	5.9037	Parp11	4.66867	Kctd2	5.00488
Echdc1	Ddit4	Zfp365	Marcks	Wasf1	Spock2			Kctd2	4.85324	Kcna3	4.36645	Elfn1	4.92154	Kctd2	4.67719	Zfp207	5.64344	Gria4	6.14244
Rnf146	Spock2	Ank3	Fyn	Cd164	Slc29a3			Gria4	6.093	Sec13	3.82879	Mb21d2	3.74517	Gria4	5.99912	Tank	3.59264	Elfn1	4.67319
Ncoa7	Psap	Phyhipl	Cdk19	Sesn1	Unc5b			Elfn1	5.03236	Acap3	4.19251	Stk3	5.20995	Elfn1	4.84925	Coro7	4.944	Mb21d2	3.9391
Nkain2	Slc29a3	Tfam	Wasf1	Foxo3	Eif4ebp2			Mb21d2	3.97122	Btbd10	4.63836	Nek7	6.45026	Mb21d2	4.15573	Errfi1	4.96099	Stk3	5.36951
Tspyl1	Unc5b	Ipmk	Sesn1	Snx3	Ppa1			Stk3	5.26519	Cttnbp2nl	5.08621	Psmd12	5.47865	Stk3	4.93219	Celf3	3.783	Nek7	6.76799
Tspyl4	Sgpl1	Pcdh15	Foxo3	Sec63	Hk1			Nek7	6.59872	Cuedc2	4.12673	Ppard	4.25328	Nek7	6.67719	Tbcb	4.66176	Psmd12	5.33288
Marcks	Ccar1	Gnaz	Snx3	Sobp	Ddx50			Psmd12	5.58985	Hecw2	6.07645	Jmjd1c	7.8478	Psmd12	5.38501	Rnf180	4.39631	Ppard	4.10626
Fyn	Reep3	Bcr	Nr2e1	Prep	Ccar1			Ppard	4.35745	Smad1	4.10127	Copg2	6.26824	Ppard	4.1208	Grin2c	5.47625	Jmjd1c	7.95499
Rev3l	Jmjd1c	Specc1l	Ostm1	Hace1	Jmjd1c			Jmjd1c	7.88594	Frmd4a	6.50476	Poc5	4.57131	Jmjd1c	7.85299	Ubap1	5.47625	Copg2	6.35661
Cdk19	Ado	Lrrc75b	Sec63	Grik2	Ado			Copg2	6.14378	Ndufa9	5.15794	Uqcr10	5.63854	Copg2	6.27333	Tbck	6.08691	Poc5	4.68909
Wasf1	Zfp365	Susd2	Sobp	Gopc	Zfp365			Poc5	4.5533	Pik3c2a	2.67045	Armcx1	5.31469	Poc5	4.87883	Gak	6.44589	Uqcr10	5.69747
Sesn1	Ank3	Cabin1	Hace1	Nus1	Arid5b			Uqcr10	5.87363	Prkd1	4.66757	Tmem130	8.25642	Uqcr10	5.65295	Sgtb	5.97985	Armcx1	5.28139
Foxo3	Phyhipl	Smarcb1	Grik2	Gja1	Ank3			Armcx1	5.28512	Rab3b	3.51845	Adamts3	5.80286	Armcx1	5.38795	Cnrip1	5.82142	Tmem130	8.03801
Nr2e1	Tfam	Chchd10	Gopc	Gcc2	Phyhipl			Tmem130	8.16557	Bicd2	5.4172	Ctdsp1	5.38253	Tmem130	8.08319	Ankrd52	5.99642	Adamts3	5.74386
Sobp	Gnaz	S100b	Nus1	Lims1	Tfam			Adamts3	6.00304	Sh3bp5l	3.03559	Clasp1	7.39537	Adamts3	5.97781	Wars	5.52276	Ctdsp1	5.33961
Atg5	Bcr	Dip2a	Gja1	P4ha1	Ipmk			Ctdsp1	5.35951	Pik3c3	4.17635	Wdr19	4.8752	Ctdsp1	5.22316	Upf2	6.93289	Clasp1	7.38469
Hace1	Specc1l	Pcnt	Lims1	Dnajb12	Gnaz			Clasp1	7.35029	Plrg1	3.38415	Rpn1	7.956	Clasp1	7.38722	Erf	3.30396	Wdr19	4.73064
Grik2	Susd2	Pofut2	Mcu	Ddit4	Bcr			Wdr19	4.68342	Aph1a	2.24382	Rgmb	5.99439	Wdr19	4.97976	Sertad2	5.47231	Rpn1	7.89516
Ascc3	Cabin1	Adarb1	Dnajb12	Spock2	Specc1l			Rpn1	7.81721	Abcf3	3.84933	Selk	6.62465	Rpn1	7.88924	Zbtb22	3.35626	Rgmb	5.84427
Gopc	Mif	Pttg1ip	Ddit4	Psap	Lrrc75b			Rgmb	5.95586	Frmd5	4.77345	Ccpg1	4.64347	Rgmb	5.7703	Gpatch11	4.81912	Selk	6.62246
Nus1	S100b	Pwp2	Spock2	Slc29a3	Susd2			Selk	6.62465	Ikzf5	4.23994	Mapt	8.61094	Selk	6.59048	Frmpd3	3.99579	Ccpg1	4.70481
Slc35f1	Dip2a	Trappc10	Slc29a3	Vps26a	Cabin1			Ccpg1	4.33577	Krtcap2	3.54387	Pacsin1	7.83024	Ccpg1	4.58793	Cyth3	4.64784	Mapt	8.58987
Gja1	Pcnt	Agpat3	Unc5b	Ddx21	Smarcb1			Mapt	8.68785	Mybbp1a	4.59645	Mtf1	5.36129	Mapt	8.62673	Thoc7	3.174	Pacsin1	7.90142
Gcc2	Adarb1	Rrp1	Eif4ebp2	Ddx50	Chchd10			Pacsin1	8.04301	Eif3f	5.59797	Sec23ip	4.45008	Pacsin1	7.85564	Wrnip1	4.40461	Mtf1	5.40523
Dnajb12	Pttg1ip	Shc2	Ppa1	Ccar1	S100b			Mtf1	5.42256	Bag5	3.61756	Gapdh	6.97359	Mtf1	5.61077	Zfp146	5.42002	Sec23ip	4.03343
Ddit4	Sumo3	Hcn2	Ddx21	Reep3	Dip2a			Sec23ip	4.48601	Sfpq	5.23019	Ubqln2	7.44813	Sec23ip	4.30636	Ankrd50	5.96869	Gapdh	6.88186
Spock2	Pfkl	Rnf126	Ddx50	Jmjd1c	Pcnt			Gapdh	6.99249	Rbm5	6.19351	Zswim5	4.43273	Gapdh	6.98365	Rbm14	3.00954	Ubqln2	7.52635
Slc29a3	Pwp2	R3hdm4	Ccar1	Ado	Lss			Ubqln2	7.57044	Mier3	4.09269	Sptlc1	5.40643	Ubqln2	7.5725	Dnlz	4.29276	Zswim5	4.52758
Unc5b	Trappc10	Wdr18	Rufy2	Zfp365	Adarb1			Zswim5	4.72987	Mocs2	4.29338	Mllt4	7.36291	Zswim5	4.6233	Zfp523	5.41592	Sptlc1	5.45566
Ppa1	Agpat3	Stk11	Herc4	Arid5b	Pttg1ip			Sptlc1	5.46062	Ppp1r37	4.98776	Hsdl1	4.74067	Sptlc1	5.33407	Ankrd45	5.19439	Mllt4	7.36008
Hk1	Hcn2	Cbarp	Lrrtm3	Ank3	Sumo3			Mllt4	7.2328	Rpgrip1l	4.81058	Drap1	6.51489	Mllt4	7.40693	Tcf12	7.20183	Hsdl1	4.56251
Vps26a	Med16	Midn	Reep3	Phyhipl	Pfkl			Hsdl1	4.88344	Nol4	5.74222	Fmn2	8.14409	Hsdl1	4.89546	Dzip1	1.87874	Drap1	6.66995
Ddx21	R3hdm4	Apc2	Jmjd1c	Tfam	Pwp2			Drap1	6.81096	Nedd9	4.31569	Ipo11	5.85806	Drap1	6.6258	Syngap1	7.74684	Fmn2	8.11012
Ccar1	Gpx4	Reep6	Ado	Cisd1	Trappc10			Fmn2	8.09192	Hbs1l	4.73534	Smarcad1	5.69299	Fmn2	8.02628	Exoc6	5.75803	Ipo11	6.02002
Herc4	Cbarp	Mbd3	Zfp365	Ipmk	Agpat3			Ipo11	5.94695	Akap12	4.60855	Slc38a3	6.41829	Ipo11	5.98947	Ctdp1	3.97364	Smarcad1	5.79861
Lrrtm3	Midn	Rexo1	Ank3	Gnaz	Rrp1			Smarcad1	5.58066	Prpf4b	1.97145	Trappc3	5.23018	Smarcad1	5.63573	Ksr1	6.07135	Slc38a3	6.28869
Jmjd1c	Rps15	Abhd17a	Phyhipl	Bcr	Shc2			Slc38a3	6.54187	Tsc1	6.27358	Atp5a1	8.75285	Slc38a3	6.41848	Ywhag	3.57803	Trappc3	5.24601
Ado	Apc2	Csnk1g2	Tfam	Specc1l	Hcn2			Trappc3	5.14259	Psmd12	4.10127	Gnb4	3.87073	Trappc3	5.27174	Orc4	3.88146	Atp5a1	8.81147
Zfp365	Reep6	Ap3d1	Ipmk	Cabin1	Rnf126			Atp5a1	8.6565	Tdrd7	4.57811	Acot13	4.65847	Atp5a1	8.8207	Btrc	6.35883	Gnb4	3.9391
Ank3	Mbd3	Sppl2b	Zwint	Mif	Palm			Gnb4	4.34122	Zfp68	5.16615	Txndc9	5.36739	Gnb4	4.04083	Fopnl	2.13973	Acot13	4.80058
Phyhipl	Klf16	Timm13	Gnaz	Smarcb1	Wdr18			Acot13	4.79882	Ehbp1	5.62204	St8sia3	8.20327	Acot13	4.80593	Ist1	5.04837	Txndc9	5.42118
Tfam	Abhd17a	Diras1	Bcr	Chchd10	Gpx4			Txndc9	5.23331	C1d	3.58119	Man2b2	6.1826	Txndc9	5.29073	Sik1	3.74427	St8sia3	8.12335
Ipmk	Scamp4	Map2k2	Specc1l	S100b	Cbarp			St8sia3	8.14156	Junb	1.53755	2610301B20Rik	4.8095	St8sia3	8.01965	Dpysl4	4.39631	Man2b2	5.90224
Zwint	Csnk1g2	Zbtb7a	Lrrc75b	Dip2a	Midn			Man2b2	6.11862	Cpsf3	4.40164	Ublcp1	4.58184	Man2b2	6.00296	Pan3	5.94611	2610301B20Rik	4.53932
Gnaz	Btbd2	Matk	Susd2	Pcnt	Ndufs7			2610301B20Rik	4.8379	St7l	2.39117	Fezf2	4.92154	2610301B20Rik	4.743	Ralyl	2.84845	Ublcp1	4.80545
Bcr	Mknk2	Celf5	Cabin1	Pofut2	Rps15			Ublcp1	4.49582	Epm2aip1	5.64572	Hnrnpab	6.34907	Ublcp1	4.55166	Ipo13	5.47231	Fezf2	4.93994
Specc1l	Sppl2b	Ncln	S100b	Pttg1ip	Apc2			Fezf2	4.91301	Sestd1	5.61606	Thy1	9.41632	Fezf2	4.81906	Elmo1	6.70312	Hnrnpab	6.37474
Lrrc75b	Timm13	Gna11	Dip2a	Sumo3	Reep6			Hnrnpab	6.39108	Tox3	3.18848	Klhdc3	6.28284	Hnrnpab	6.39236	Kcna3	5.2415	Thy1	9.23925
Susd2	Diras1	Nfyb	Pcnt	Pfkl	Mbd3			Thy1	9.44148	Srsf12	3.08837	Hrh3	0.56268	Thy1	9.25754	Sec13	4.70274	Klhdc3	6.35495
S100b	Slc39a3	Appl2	Mcm3ap	Pwp2	Uqcr11			Klhdc3	6.36991	Scfd2	2.90434	Dhx9	5.81407	Klhdc3	6.44838	Acap3	5.06418	Dhx9	6.06335
Pcnt	Map2k2	Nuak1	Lss	Trappc10	Abhd17a			Dhx9	5.8102	Slc25a19	2.90434	Smndc1	4.71219	Dhx9	5.883	Btbd10	5.50743	Smndc1	4.54515
Mcm3ap	Zbtb7a	Ckap4	Pofut2	Agpat3	Csnk1g2			Smndc1	4.59495	Srebf1	4.80533	Ttc5	4.00201	Smndc1	4.72915	Cttnbp2nl	5.95462	Ttc5	4.03343
Lss	Matk	Ric8b	Adarb1	Rrp1	Sppl2b			Ttc5	3.99907	Fzd1	4.36645	Mtmr7	5.48428	Ttc5	4.37911	Cuedc2	4.99438	Mtmr7	5.3988
Adarb1	Pip5k1c	Tmem263	Pttg1ip	Shc2	Timm13			Mtmr7	5.26806	Ilf3	5.16205	Ptprm	6.12795	Mtmr7	5.61328	Hecw2	6.9429	Ptprm	6.18229
Pttg1ip	Celf5	Prdm4	Sumo3	Bsg	Diras1			Ptprm	6.11862	Ap3b1	5.87334	Ewsr1	7.50458	Ptprm	6.03709	Smad1	4.96661	Ewsr1	7.49127
Sumo3	Ncln	Rtcb	Pfkl	Hcn2	Slc39a3			Ewsr1	7.53223	Zfp334	4.53439	Ccdc25	4.58184	Ewsr1	7.57766	Frmd4a	7.36814	Ccdc25	4.78094
Pwp2	Gna11	Timp3	Trappc10	Palm	Zbtb7a			Ccdc25	4.56731	Ttc1	4.2085	Pde6d	4.53924	Ccdc25	4.74758	Ndufa9	6.02093	Pde6d	4.51574
Trappc10	Chst11	Hsp90b1	Agpat3	Med16	Atcay			Pde6d	4.30821	Rsrc1	4.92142	Mfn2	7.59184	Pde6d	4.33712	Pik3c2a	3.53329	Mfn2	7.60594
Agpat3	Appl2	Gnptab	Rrp1	R3hdm4	Matk			Mfn2	7.76089	Mta2	4.3083	Lrrc58	8.8297	Mfn2	7.63943	Prkd1	5.53037	Lrrc58	8.93547
Rrp1	Nuak1	Arl1	Hcn2	Wdr18	Pip5k1c			Lrrc58	8.97404	Cux2	4.57811	Rer1	6.26497	Lrrc58	8.96407	Ndst3	2.05787	Rer1	6.24814
Shc2	Ckap4	Slc25a3	Rnf126	Gpx4	Celf5			Rer1	6.15001	Phlpp2	5.32855	Gpr155	7.38563	Rer1	6.1436	Rab3b	4.37956	Gpr155	7.34177
Cdc34	Ric8b	Tmpo	Palm	Cbarp	Ncln			Gpr155	7.43428	Ablim2	5.16615	Gramd3	4.85797	Gpr155	7.31334	Bicd2	6.27753	Gramd3	4.96192
Hcn2	Timp3	Cdk17	R3hdm4	Midn	Gna11			Gramd3	5.03908	Banf1	3.67621	Rasl10b	8.26339	Gramd3	4.98753	Sh3bp5l	3.89331	Rasl10b	8.23718
R3hdm4	Hsp90b1	Metap2	Gpx4	Apc2	Nfyb			Rasl10b	8.62249	Cars	4.29338	Rasa2	6.2151	Rasl10b	8.15444	Pik3c3	5.03238	Rasa2	6.31454
Wdr18	Nt5dc3	Cep83	Stk11	Reep6	Txnrd1			Rasa2	6.31557	Zc3h14	4.01301	Ddx19b	4.77779	Rasa2	6.19825	Plrg1	4.23806	Ddx19b	4.99639
Gpx4	Igf1	Plxnc1	Cbarp	Mbd3	Chst11			Ddx19b	4.77486	C77080	1.31937	Pias1	5.44732	Ddx19b	4.63325	Aph1a	3.09411	Pias1	5.34297
Cbarp	Chpt1	Eea1	Midn	Rexo1	Appl2			Pias1	5.34873	Ciao1	3.98544	Acp2	7.36367	Pias1	5.15573	Abcf3	4.69599	Acp2	7.32236
Midn	Arl1	Atp2b1	Ndufs7	Csnk1g2	Nuak1			Acp2	7.3929	Arid2	5.75043	Bms1	4.90066	Acp2	7.31024	Frmd5	5.61867	Bms1	4.94877
Ndufs7	Slc25a3	Dusp6	Apc2	Btbd2	Ckap4			Bms1	4.91301	Mat2b	4.76806	Hus1	2.9859	Bms1	4.99527	Ikzf5	5.08499	Hus1	3.23317
Rps15	Metap2	Slc6a15	Reep6	Mknk2	Ric8b			Hus1	3.32608	Trerf1	4.4495	Cacng2	5.8163	Hus1	3.03334	Krtcap2	4.38796	Cacng2	5.87933
Reep6	Vezt	Tmtc2	Mbd3	Ap3d1	Prdm4			Cacng2	5.95408	Ints3	4.79478	Dact2	3.46698	Cacng2	5.68199	Mybbp1a	5.44036	Dact2	3.08087
Mbd3	Fgd6	Ppp1r12a	Uqcr11	Sppl2b	Timp3			Dact2	3.39058	Fgfrl1	4.62651	Vcpip1	6.22857	Dact2	3.47074	Eif3f	6.44186	Vcpip1	6.42306
Uqcr11	Plxnc1	Nav3	Abhd17a	Diras1	Hsp90b1			Vcpip1	6.21527	Naa25	6.1733	Foxo3	5.70026	Vcpip1	6.33102	Bag5	4.46143	Foxo3	5.71051
Rexo1	Eea1	Kcnc2	Csnk1g2	Map2k2	Nt5dc3			Foxo3	5.79837	Pamr1	4.91656	Galnt13	5.48988	Foxo3	5.63325	Sfpq	6.07395	Galnt13	5.34297
Klf16	Btg1	Atxn7l3b	Btbd2	Zbtb7a	Tmpo			Galnt13	5.50984	Ophn1	5.43769	Wdtc1	6.48854	Galnt13	5.40257	Rbm5	7.03536	Wdtc1	6.27998
Abhd17a	Atp2b1	Tmem19	Mknk2	Eef2	Cdk17			Wdtc1	6.68696	Zhx2	4.89696	Grin1	9.48439	Wdtc1	6.32949	Mier3	4.93256	Grin1	9.44767
Csnk1g2	Dusp6	Zfc3h1	Ap3d1	Matk	Fgd6			Grin1	9.59007	Bckdhb	3.68766	Coq9	4.90486	Grin1	9.41488	Mocs2	5.13075	Coq9	4.83433
Btbd2	Cep290	Kcnmb4	Sppl2b	Pip5k1c	Ndufa12			Coq9	4.60405	Zfp654	4.83138	Dhx32	4.53383	Coq9	4.62828	Ppp1r37	5.82452	Dhx32	4.74084
Mknk2	Slc6a15	Cct2	Timm13	Celf5	Cep83			Dhx32	4.85324	Ttc14	6.82296	Nlgn2	8.16832	Dhx32	4.72915	Rpgrip1l	5.64694	Nlgn2	7.88139
Ap3d1	Ppfia2	Cpsf6	Gng7	Ncln	Plxnc1			Nlgn2	8.18805	Clvs2	5.94904	Rpl13a	7.53674	Nlgn2	7.86623	Nol4	6.5784	Rpl13a	7.55987
Sppl2b	Syt1	Mdm2	Diras1	Gna11	Nudt4			Rpl13a	7.67718	Immt	6.29806	Olig2	4.09317	Rpl13a	7.48661	Nedd9	5.14569	Olig2	4.24175
Gng7	Nav3	Slc35e3	Sgta	Nfyb	Eea1			Olig2	3.90653	Hook1	4.64425	Sstr1	3.88781	Olig2	3.95617	Hbs1l	5.56412	Sstr1	3.52055
Diras1	Kcnc2	Rap1b	Map2k2	Chst11	Btg1			Sstr1	3.64089	Begain	4.80007	Tatdn2	5.28599	Sstr1	3.77929	Akap12	5.43631	Tatdn2	5.26734
Slc39a3	Atxn7l3b	Cand1	Zbtb7a	Appl2	Atp2b1			Tatdn2	5.36487	Ythdc1	4.62651	Lrig2	4.49535	Tatdn2	5.15573	Prpf4b	2.79892	Lrig2	4.69435
Map2k2	Rab21	Tbc1d30	Atcay	Nuak1	Kitl			Lrig2	4.56731	Elp2	5.47781	Ccnl2	6.1998	Lrig2	4.81906	Tsc1	7.09942	Ccnl2	6.36982
Zbtb7a	Tmem19	Gns	Matk	Ckap4	Tmtc3			Ccnl2	6.02182	Nup155	3.84933	Grik2	7.55222	Ccnl2	6.11015	Psmd12	4.92681	Grik2	7.60245
Atcay	Zfc3h1	Tbk1	Pip5k1c	Prdm4	Mgat4c			Grik2	7.58487	Gon4l	5.17431	Arhgap5	8.89977	Grik2	7.44131	Tdrd7	5.40355	Arhgap5	9.11973
Matk	Kcnmb4	Mon2	Celf5	Rtcb	Slc6a15			Arhgap5	8.98648	Arhgap33	4.33038	Ndfip2	6.59116	Arhgap5	9.02816	Zfp68	5.99092	Ndfip2	6.59882
Celf5	Cct2	Agap2	Gna11	Timp3	Syt1			Ndfip2	6.54542	Zfp629	4.38767	Chrm4	4.55537	Ndfip2	6.47766	Ehbp1	6.44589	Chrm4	4.81996
Ncln	Cpsf6	Arhgef25	Nfyb	Hsp90b1	Nav3			Chrm4	4.86842	Srrm1	6.28304	Faim2	8.86893	Chrm4	4.33102	C1d	4.40461	Faim2	8.6668
Gna11	Mdm2	Pip4k2c	Nuak1	Nt5dc3	Kcnc2			Faim2	8.83562	Fdft1	6.0545	Xpr1	8.23948	Faim2	8.64713	Junb	2.36066	Xpr1	8.25375
Chst11	Dyrk2	Kif5a	Ckap4	Igf1	Tbc1d15			Xpr1	8.22315	Cblb	5.32122	Reps2	7.9905	Xpr1	8.18309	Cpsf3	5.22284	Reps2	8.11748
Appl2	Cand1	Dctn2	Ric8b	Slc25a3	Rab21			Reps2	8.04259	Usp13	4.2477	Rap1b	3.80032	Reps2	8.01586	St7l	3.21234	Rap1b	3.85706
Nuak1	Tbc1d30	R3hdm2	Tmem263	Metap2	Tmem19			Rap1b	3.87682	Pafah1b1	3.42577	Uqcrh	6.22185	Rap1b	4.26855	Epm2aip1	6.46586	Uqcrh	6.19904
Ckap4	Gns	Lrp1	Timp3	Fgd6	Zfc3h1			Uqcrh	6.16699	Nudt11	4.04897	Hap1	6.35215	Uqcrh	6.14881	Sestd1	6.43579	Hap1	6.41193
Ric8b	Mon2	Naca	Hsp90b1	Ndufa12	Cct2			Hap1	6.47775	Gng3	4.88209	Hcfc1	7.33983	Hap1	6.34924	Tox3	4.00674	Hcfc1	7.30957
Prdm4	Agap2	Ptges3	Nt5dc3	Tmcc3	Cpsf6			Hcfc1	7.47513	Vps54	5.64865	Ppp4r2	4.68314	Hcfc1	7.297	Asb3	1.3694	Ppp4r2	4.67319
Rtcb	B4galnt1	Baz2a	Igf1	Cep83	Rap1b			Ppp4r2	4.71315	Csrnp2	2.82361	Prkaca	6.98256	Ppp4r2	4.743	Srsf12	3.89331	Prkaca	7.16647
Timp3	Arhgef25	Cs	Gnptab	Plxnc1	Dyrk2			Prkaca	7.13422	Fzd2	1.81319	Dnajb6	6.508	Prkaca	7.11637	Scfd2	3.70447	Dnajb6	6.48659
Hsp90b1	Pip4k2c	Nabp2	Uhrf1bp1l	Nudt4	Cand1			Dnajb6	6.45405	Cndp2	3.80796	Gbas	5.82298	Dnajb6	6.55166	Slc25a19	3.70447	Gbas	5.97102
Nt5dc3	Kif5a	Myl6	Tmpo	Eea1	Tbc1d30			Gbas	5.82778	Aamp	4.81581	Prps2	5.24682	Gbas	5.83424	Srebf1	5.60432	Prps2	5.24601
Chpt1	R3hdm2	Pa2g4	Lta4h	Dcn	Tbk1			Prps2	5.03908	Ctps	3.73258	Snx6	3.17863	Prps2	5.36724	Fzd1	5.16537	Snx6	3.08087
Uhrf1bp1l	Lrp1	Dnajc14	Metap2	Atp2b1	Mon2			Snx6	3.07451	Csnk1e	4.65011	Cd82	5.4241	Snx6	3.16262	Ilf3	5.96026	Cd82	5.14592
Tmpo	Naca	Gdf11	Vezt	Cep290	Agap2			Cd82	5.31312	Paf1	4.14346	Bsn	10.1024	Cd82	5.49822	Ap3b1	6.67079	Bsn	9.99224
Metap2	Ptges3	Limk2	Fgd6	Slc6a15	B4galnt1			Bsn	10.2578	Sema4g	5.07318	Golga2	5.81853	Bsn	9.94984	Zfp334	5.33135	Golga2	5.69222
Fgd6	Baz2a	Tug1	Tmcc3	Ppfia2	Arhgef25			Golga2	5.68078	Ubr7	4.38063	Arhgef3	5.04467	Golga2	5.66996	Ttc1	5.00534	Arhgef3	5.20974
Ndufa12	Cs	Osbp2	Cep83	Lin7a	Pip4k2c			Arhgef3	5.23623	Kcnh3	5.45454	Id2	6.22017	Arhgef3	5.31256	Rsrc1	5.71529	Id2	6.21009
Tmcc3	Smarcc2	Dusp18	Plxnc1	Syt1	Kif5a			Id2	6.21378	Zcchc6	5.76131	Senp7	5.33351	Id2	6.2149	Mta2	5.10041	Senp7	5.46799
Plxnc1	Myl6	Slc35e4	Nudt4	Nav3	R3hdm2			Senp7	5.38875	Tnrc6a	6.20551	Prkd3	5.5898	Senp7	5.4596	Cux2	5.37002	Prkd3	5.70791
Eea1	Pa2g4	Mtfp1	Eea1	Zdhhc17	Lrp1			Prkd3	5.72731	Cog6	4.38767	Pbx3	2.47783	Prkd3	5.5828	Phlpp2	6.11501	Pbx3	1.87042
Btg1	Rps26	Sec14l2	Atp2b1	Kcnc2	Baz2a			Pbx3	2.38248	Pptc7	4.67908	Gab1	5.70509	Pbx3	2.75215	Ablim2	5.95179	Gab1	5.79616
Atp2b1	Dnajc14	Sf3a1	Kitl	Atxn7l3b	Nabp2			Gab1	5.66348	Hrk	4.44276	Maz	6.73493	Gab1	5.71984	Banf1	4.46143	Maz	6.75421
Dusp6	Gdf11	Uqcr10	Tmtc3	Rab21	Myl6			Maz	6.95743	Cry2	4.75724	Btbd1	7.22693	Maz	6.8245	Cars	5.07462	Btbd1	7.42084
Tmtc3	Cd63	Cabp7	Cep290	Zfc3h1	Pa2g4			Btbd1	7.26613	Ccdc25	3.98544	Nsdhl	4.29868	Btbd1	7.27333	Zc3h14	4.79406	Nsdhl	4.57397
Cep290	Eif4enif1	Nf2	Slc6a15	Cnot2	Rps26			Nsdhl	4.54859	Brd4	5.94665	Gm2a	6.932	Nsdhl	4.39674	C77080	2.09938	Nkain2	0.154027
Mgat4c	Drg1	Ap1b1	Tmtc2	Cct2	Dnajc14			Gm2a	7.1295	Tceb2	3.61756	Higd1a	5.16862	Gm2a	7.02297	Ciao1	4.7621	Gm2a	7.03273
Slc6a15	Limk2	Nefh	Lin7a	Cpsf6	Gdf11			Higd1a	5.21561	Rab8a	4.02208	Tgoln1	8.41576	Higd1a	5.22973	Arid2	6.52608	Higd1a	5.14207
Tmtc2	Inpp5j	Gas2l1	Syt1	Mdm2	Eif4enif1			Tgoln1	8.25778	Adam17	2.30458	Ift80	4.93803	Tgoln1	8.22234	Mat2b	5.54171	Tgoln1	8.21402
Ppp1r12a	Tug1	Ewsr1	Nav3	Slc35e3	Drg1			Ift80	4.75866	Nr2f1	5.62204	Zcchc2	5.30201	Ift80	4.6233	Trerf1	5.22284	Ift80	4.78588
Syt1	Osbp2	Kremen1	Kcnc2	Rap1b	Limk2			Zcchc2	5.36487	Pdhb	5.15382	Cck	7.34679	Zcchc2	5.52252	Ints3	5.56782	Zcchc2	5.22072
Nav3	Slc35e4	Xbp1	Atxn7l3b	Dyrk2	Inpp5j			Cck	7.36641	Lsm6	5.06002	Krtcap2	4.72175	Cck	7.14099	Fgfrl1	5.3994	Cck	7.34093
Kcnc2	Mtfp1	Ykt6	Trhde	Cand1	Osbp2			Krtcap2	4.81066	Uhrf2	4.74084	Pip5k1c	8.17268	Krtcap2	4.64313	Naa25	6.94433	Krtcap2	4.78094
Atxn7l3b	Sf3a1	Camk2b	Tbc1d15	Tbc1d30	Dusp18			Pip5k1c	8.27141	Zer1	5.8658	Pon2	6.65115	Pip5k1c	8.10122	Pamr1	5.68493	Pip5k1c	8.00928
Trhde	Uqcr10	Nudcd3	Rab21	Gns	Slc35e4			Pon2	6.72394	Cstf3	4.75179	Sidt1	6.74199	Pon2	6.61328	Ophn1	6.2057	Pon2	6.70033
Tbc1d15	Cabp7	Purb	Tmem19	Tbk1	Sec14l2			Sidt1	6.65341	B4galt3	5.32855	Pcp4	1.83485	Sidt1	6.54641	Zhx2	5.66433	Sidt1	6.6197
Rab21	Nf2	Adcy1	Zfc3h1	Srgap1	Mtmr3			Pcp4	1.42892	Kctd10	4.44276	Bmp3	3.80931	Pcp4	2.00296	Bckdhb	4.45345	Pcp4	1.87042
Tmem19	Ap1b1	Tns3	Cct2	Slc16a7	Uqcr10			Bmp3	3.41146	Ttl	5.25349	Aff4	8.60159	Bmp3	3.04829	Zfp654	5.5971	Bmp3	2.89237
Zfc3h1	Gas2l1	Cobl	Yeats4	Agap2	Cabp7			Aff4	8.52978	Zc3h12c	4.4893	Sorbs1	7.06651	Aff4	8.63201	Ttc14	7.58457	Aff4	8.67547
Kcnmb4	Ewsr1	Cnrip1	Mdm2	Os9	Nf2			Sorbs1	7.12713	Wdr1	5.12884	Sult4a1	7.3781	Sorbs1	7.07682	Clvs2	6.70984	Sorbs1	7.14166
Cnot2	Kremen1	Ppp3r1	Slc35e3	B4galnt1	Ap1b1			Sult4a1	7.53104	Csnk1a1	7.43642	Myo18a	7.69185	Sult4a1	7.52519	Immt	7.05791	Sult4a1	7.39765
Cct2	Xbp1	Spred2	Rap1b	Arhgef25	Nefh			Myo18a	7.74093	Kcnn2	4.69051	Szt2	6.40055	Myo18a	7.69393	Hook1	5.40355	Myo18a	7.68403
Mdm2	Ykt6	Actr2	Dyrk2	Pip4k2c	Gas2l1			Szt2	6.3937	Wnt4	4.27072	Grm3	7.80405	Szt2	6.36575	Begain	5.55669	Szt2	6.23196
Slc35e3	Nudcd3	Rab1a	Cand1	Kif5a	Kremen1			Grm3	7.76444	Arhgap10	3.47946	Stmn1	7.25353	Grm3	7.70517	Ythdc1	5.38269	Grm3	7.68733
Dyrk2	Zmiz2	Cep68	Tbc1d30	Dctn2	Ykt6			Stmn1	7.18964	Zfp358	2.44613	Sox5	6.02559	Stmn1	7.34244	Elp2	6.23393	Stmn1	7.21119
Tbc1d30	Purb	Slc1a4	Gns	R3hdm2	Camk2b			Sox5	6.08165	Prmt2	4.55329	Ppp2r5b	5.99044	Sox5	6.13137	Nup155	4.60525	Sox5	6.22471
Gns	Ccm2	Peli1	Rassf3	Lrp1	Zmiz2			Ppp2r5b	6.15466	1500011B03Rik	3.86958	Snapc2	3.60763	Ppp2r5b	6.13488	Gon4l	5.92895	Ppp2r5b	6.11721
Xpot	Adcy1	Ugp2	Tbk1	Naca	Ppia			Snapc2	3.70147	Pex1	4.16819	Ap2s1	5.29882	Snapc2	3.6382	Arhgap33	5.08499	Snapc2	3.20397
Mon2	Tns3	Ehbp1	Mon2	Baz2a	Purb			Ap2s1	5.0755	Cdk12	5.34311	Camk2d	5.89443	Ap2s1	5.297	Zfp629	5.14073	Ap2s1	4.87195
Slc16a7	Plek	Cct4	Usp15	Cs	Tns3			Camk2d	5.85851	Dlst	3.0534	Hdac11	6.25842	Camk2d	5.85777	Srrm1	7.03403	Camk2d	5.7053
Agap2	Cnrip1	Cfap36	Agap2	Myl6	Grb10			Hdac11	6.36055	Hdac3	3.8796	Rbfox3	7.07492	Hdac11	6.40112	Fdft1	6.80543	Hdac11	6.10738
B4galnt1	Ppp3r1	Ccdc88a	B4galnt1	Dnajc14	Cobl			Rbfox3	7.32507	Smcr8	5.17838	Slc9a8	5.66106	Rbfox3	7.09763	Cblb	6.06874	Rbfox3	7.09867
Arhgef25	Spred2	Mtif2	Arhgef25	Gdf11	Plek			Slc9a8	5.41225	Tmub1	3.39816	Slc9a3r1	5.61822	Slc9a8	5.60572	Usp13	4.99438	Slc9a8	5.48326
Pip4k2c	Cep68	Rtn4	Pip4k2c	Eif4enif1	Ppp3r1			Slc9a3r1	5.69575	Btbd2	4.42235	Pigm	4.72175	Slc9a3r1	5.64067	Pafah1b1	4.1715	Slc9a3r1	5.59715
Kif5a	Slc1a4	Sptbn1	Kif5a	Drg1	C1d			Pigm	4.74228	Gtf2h1	4.69619	Tnpo2	7.30051	Pigm	4.66754	Nudt11	4.79406	Pigm	4.92212
Dctn2	Sertad2	Erlec1	Dctn2	Limk2	Spred2			Tnpo2	7.30708	Bahcc1	3.93829	Ndufs4	5.02936	Tnpo2	7.26616	Gng3	5.62579	Tnpo2	7.22579
Lrp1	Lgalsl	Cpeb4	R3hdm2	Inpp5j	Actr2			Ndufs4	5.05243	Prox1	5.99584	Arid5b	5.20995	Ndufs4	5.25895	Vps54	6.39053	Ndufs4	5.03421
Naca	Ugp2	Ubtd2	Lrp1	Tug1	Rab1a			Arid5b	5.44045	Car8	4.40857	Rtn4r	5.69056	Arid5b	5.12786	Csrnp2	3.56327	Arid5b	5.39558
Baz2a	B3gnt2	Fbxw11	Naca	Osbp2	Cep68			Rtn4r	5.73768	Scyl2	4.42918	Coro7	5.40049	Rtn4r	5.78822	Fzd2	2.5522	Rtn4r	5.418
Cs	Xpo1	Slit3	Baz2a	Slc35e4	Sertad2			Coro7	5.50256	Rnf112	6.04341	Calm1	10.9016	Coro7	5.50366	Cndp2	4.54643	Coro7	5.47412
Myl6	Usp34	Pank3	Cs	Mtfp1	Peli1			Calm1	10.9796	Scai	6.25638	Fabp7	5.04467	Calm1	10.9444	Aamp	5.55296	Calm1	10.9838
Pa2g4	Papolg	Wwc1	Smarcc2	Sec14l2	Vps54			Fabp7	5.50256	Zfp280d	6.23508	Dlg5	6.44738	Fabp7	5.56212	Ctps	4.46937	Fabp7	5.12659
Rps26	Rtn4	Ccng1	Myl6	Sf3a1	B3gnt2			Dlg5	6.54659	Bcl9l	4.46289	Hnrnph2	6.60155	Dlg5	6.50366	Csnk1e	5.38688	Dlg5	6.32644
Dnajc14	Sptbn1	Gabrg2	Pa2g4	Ascc2	Cct4			Hnrnph2	6.49985	Ryk	5.97497	Nfkbia	4.27292	Hnrnph2	6.57895	Paf1	4.87993	Hnrnph2	6.69378
Gdf11	Psme4	Gabra1	Rps26	Uqcr10	Xpo1			Nfkbia	4.77083	Mrgpre	3.53122	Rpl27	5.97654	Nfkbia	4.38501	Sema4g	5.80897	Nfkbia	4.75601
Eif4enif1	Erlec1	Slu7	Rab5b	Cabp7	Rtn4			Rpl27	5.87551	Tti1	2.98079	Fam163b	6.71832	Rpl27	5.81688	Ubr7	5.11566	Rpl27	5.82522
Limk2	Bod1	Ttc1	Dnajc14	Nf2	Sptbn1			Fam163b	6.89673	Zfp574	2.82361	Wdr7	7.87803	Fam163b	6.461	Kcnh3	6.18898	Fam163b	6.71852
Inpp5j	Cpeb4	Ublcp1	Gdf11	Ap1b1	Psme4			Wdr7	7.92548	Kdm6a	4.56576	Elmo2	7.34911	Wdr7	7.96013	Zcchc6	6.49532	Wdr7	8.01034
Osbp2	Nsg2	Lsm11	Eif4enif1	Gas2l1	Bod1			Elmo2	7.39486	Dopey1	5.48767	Ndufs1	6.67839	Elmo2	7.4192	Tnrc6a	6.93862	Elmo2	7.4692
Dusp18	Ubtd2	Cyfip2	Drg1	Ewsr1	Cpeb4			Ndufs1	6.64241	Psmc4	4.75724	Ptprj	8.65836	Ndufs1	6.76012	Cog6	5.12071	Ndufs1	6.66862
Slc35e4	Fbxw11	Mgat1	Limk2	Kremen1	Ubtd2			Ptprj	8.63946	Mbd3	4.22431	Tprgl	2.52225	Ptprj	8.44379	Pptc7	5.41181	Ptprj	8.62782
Mtfp1	Slit3	Cnot6	Osbp2	Xbp1	Fbxw11			Tprgl	2.7696	Ranbp1	4.2477	Rgs6	2.06248	Tprgl	2.28126	Hrk	5.17511	Tprgl	2.58777
Sf3a1	Pank3	Sqstm1	Dusp18	Ykt6	Slit3			Rgs6	2.56123	Hdgfrp2	4.81058	Rab6a	8.62119	Rgs6	2.51446	Cry2	5.48802	Rgs6	2.34187
Mtmr3	Wwc1	Rufy1	Slc35e4	Camk2b	Pank3			Rab6a	8.62109	Cdk9	4.49583	Cyth1	6.01007	Rab6a	8.72275	Ccdc25	4.71614	Rab6a	8.79626
Cabp7	Gabrg2	Zfp354c	Pes1	Nudcd3	Wwc1			Cyth1	6.06693	Hmgn1	5.17838	Ap1m1	5.24682	Cyth1	6.0427	Brd4	6.67594	Cyth1	6.01582
Ap1b1	Gabra1	Hnrnpab	Sec14l2	Ddx56	Ccng1			Ap1m1	5.32967	Sox5	6.20949	Cux1	6.56485	Ap1m1	5.43422	Tceb2	4.34546	Ap1m1	5.24601
Nefh	Slu7	Sec24a	Sf3a1	Tmed4	Slu7			Cux1	6.48392	Ak1	5.02885	Nrp1	8.29174	Cux1	6.37319	Rab8a	4.74912	Cux1	6.37965
Kremen1	Rnf145	Jade2	Uqcr10	Zmiz2	Pwwp2a			Nrp1	8.2473	Kctd5	3.22037	Zfp354c	5.78017	Nrp1	8.09718	Adam17	3.03115	Nrp1	8.30922
Xbp1	Clint1	Ppp2ca	Cabp7	Purb	Ttc1			Zfp354c	5.83552	Slc15a4	4.98776	Pip4k2b	6.94634	Zfp354c	6.07591	Nr2f1	6.34811	Zfp354c	5.94699
Ykt6	Lsm11	9530068E07Rik	Nf2	Ccm2	Ublcp1			Pip4k2b	7.01993	Kctd2	3.43938	Eif4a1	7.12079	Pip4k2b	7.10569	Pdhb	5.87917	Pip4k2b	7.03894
Camk2b	Mgat1	Hspa4	Ap1b1	Adcy1	Rnf145			Eif4a1	7.13578	Gpr137	4.88706	AI593442	7.87803	Eif4a1	7.18647	Lsm6	5.78373	Eif4a1	7.20383
Ddx56	Cnot6	Aff4	Gas2l1	Tns3	Clint1			AI593442	7.89338	Ahdc1	4.29338	Chst2	8.27966	AI593442	7.76861	Uhrf2	5.46439	AI593442	7.83868
Ogdh	Mapk9	Sowaha	Kremen1	Cobl	Lsm11			Chst2	8.42365	Kazn	3.97613	Zfpm2	5.11887	Chst2	8.25493	Zer1	6.58754	Chst2	8.31436
Zmiz2	Rnf130	Acsl6	Xbp1	Vstm2a	Cyfip2			Zfpm2	5.08528	Phkb	5.628	Sar1b	5.92163	Zfpm2	5.16605	Cstf3	5.47231	Zfpm2	5.07913
Purb	Tbc1d9b	Rapgef6	Urgcp	Plek	Mgat1			Sar1b	5.91076	Tmem132d	5.13721	Esd	4.94621	Sar1b	6.0068	B4galt3	6.04769	Sar1b	5.91806
Ccm2	Sqstm1	Cdc42se2	Ykt6	Cnrip1	Cnot6			Esd	5.12057	Alas1	3.0534	Dcun1d3	4.65847	Esd	5.21987	Kctd10	5.16047	Esd	5.21341
Adcy1	Mgat4b	Gm2a	Camk2b	Ppp3r1	Mapk9			Dcun1d3	4.72987	Tbc1d23	4.9738	Hpcal4	9.57268	Dcun1d3	4.93621	Ttl	5.96869	Dcun1d3	4.90861
Tns3	Zfp354c	Slc36a1	Nudcd3	Actr2	Tbc1d9b			Hpcal4	9.70945	Ftsj3	4.62055	Dnajb2	5.06733	Hpcal4	9.61077	Zc3h12c	5.20394	Hpcal4	9.61889
Ppp3r1	Hnrnpab	Sparc	Zmiz2	Rab1a	Sqstm1			Dnajb2	4.94558	Ubtd2	2.90434	Pik3ca	6.78593	Dnajb2	5.0068	Wdr1	5.84297	Dnajb2	4.74084
Spred2	Jade2	Gria1	Purb	Cep68	Mgat4b			Pik3ca	6.66974	Setbp1	6.70678	Zfp710	4.70739	Pik3ca	6.70812	Csnk1a1	8.15014	Pik3ca	6.73264
Actr2	Ube2b	Mfap3	Ccm2	Slc1a4	Zfp354c			Zfp710	4.65307	Rps6kb1	5.87585	Bcl2	5.30836	Zfp710	4.62828	Kcnn2	5.40355	Zfp710	4.65712
Rab1a	Ppp2ca	Sap30l	Tns3	Sertad2	Hnrnpab			Bcl2	5.29919	Zfp385a	3.312	Creb3l2	3.60763	Bcl2	5.33712	Wnt4	4.98333	Bcl2	5.38586
Cep68	Hspa4	Larp1	Grb10	Vps54	Jade2			Creb3l2	3.89175	Camk1	4.06661	Tmeff1	7.01498	Creb3l2	3.883	Arhgap10	4.19083	Creb3l2	3.90322
Slc1a4	Uqcrq	Cnot8	Cobl	Cct4	Cdkn2aipnl			Tmeff1	7.13029	Grsf1	5.58578	Pcdh17	8.00818	Tmeff1	6.96408	Zfp358	3.15443	Tmeff1	7.01287
Sertad2	Sowaha	Zfp672	Plek	Usp34	Ppp2ca			Pcdh17	8.02872	Cacng5	2.0797	Nrcam	4.90905	Pcdh17	7.88924	Prmt2	5.25992	Pcdh17	7.98481
Aftph	Kif3a	Sh3bp5l	Ppp3r1	Cfap36	Skp1			Nrcam	4.78289	Ric8b	3.84933	Chchd10	5.46165	Nrcam	4.60319	1500011B03Rik	4.57614	Nrcam	4.69435
Ugp2	Acsl6	Rnf187	Spred2	Rtn4	Hspa4			Chchd10	5.45309	N4bp2l2	6.56498	Glrx2	5.75247	Chchd10	5.66269	Pex1	4.87397	Chchd10	5.45875
Ehbp1	Cdc42se2	Snap47	Actr2	Sptbn1	Aff4			Glrx2	5.71476	Zdhhc23	4.74633	Cbfb	4.93393	Glrx2	5.80593	Cdk12	6.04769	Glrx2	5.90224
B3gnt2	Gm2a	Mprip	Rab1a	Psme4	Sowaha			Cbfb	4.78689	Jup	3.76537	Plek	3.95417	Cbfb	4.80152	Dlst	3.75729	Cbfb	4.90408
Xpo1	Slc36a1	Flcn	Cep68	Erlec1	Kif3a			Plek	3.69297	Med28	4.28587	Tgfb1i1	3.68782	Plek	3.67719	Hdac3	4.58347	Plek	4.01673
Usp34	Sparc	Srebf1	Sertad2	Cpeb4	Acsl6			Tgfb1i1	3.54968	Snx10	5.91291	Dhx40	5.13683	Tgfb1i1	2.87464	Smcr8	5.88215	Tgfb1i1	3.48457
Cfap36	Gria1	Tom1l2	Aftph	Ubtd2	Rapgef6			Dhx40	5.01882	Abcc5	5.00159	Vsnl1	8.22988	Dhx40	5.09943	Tmub1	4.10172	Dhx40	5.24243
Ccdc88a	Sap30l	Gid4	Lgalsl	Fbxw11	Hint1			Vsnl1	8.28879	Selm	4.01301	Fam149a	4.65847	Vsnl1	8.35602	Btbd2	5.12574	Vsnl1	8.28241
Rtn4	Larp1	Alkbh5	Peli1	Slit3	Gpx3			Fam149a	4.69624	Gtf2h5	4.93589	Ppp1r12b	7.2877	Fam149a	4.6382	Gtf2h1	5.3994	Fam149a	4.66786
Sptbn1	Cnot8	Llgl1	B3gnt2	Pank3	Slc36a1			Ppp1r12b	7.43556	Tsc2	5.98892	Srebf2	7.58138	Ppp1r12b	7.25734	Bahcc1	4.64083	Ppp1r12b	7.32152
Erlec1	Zfp672	Flii	Rtn4	Wwc1	Sparc			Srebf2	7.58659	Ift52	3.90924	Mras	7.5589	Srebf2	7.35902	Prox1	6.69807	Srebf2	7.35594
Cpeb4	Sh3bp5l	Smcr8	Sptbn1	Mat2b	Gria1			Mras	7.73576	Nploc4	5.28399	Ankfy1	6.43727	Mras	7.56277	Car8	5.11059	Mras	7.60455
Ubtd2	Rnf187	Tmem11	Psme4	Ccng1	Sap30l			Ankfy1	6.37921	Cdkn2aipnl	3.62948	Dixdc1	6.86351	Ankfy1	6.38354	Scyl2	5.13075	Ankfy1	6.44507
Fbxw11	Snap47	Usp22	Erlec1	Gabrg2	Larp1			Dixdc1	6.83627	Cerk	5.02434	Prkcg	8.3909	Dixdc1	6.95617	Rnf112	6.7446	Dixdc1	6.92947
Slit3	Mprip	Aldh3a2	Asb3	Gabra1	Cnot8			Prkcg	8.44659	Evl	4.8771	Snx19	6.16345	Prkcg	8.49754	Scai	6.95708	Prkcg	8.44685
Pank3	Flcn	Epn2	Bod1	Slu7	Zfp672			Snx19	6.15001	Uqcr11	4.18445	Smurf2	5.4502	Snx19	5.99141	Zfp280d	6.93289	Snx19	5.99466
Rars	Rai1	Specc1	Cpeb4	Pwwp2a	Zfp39			Smurf2	5.75411	Actr8	3.86958	Rpl6	7.37961	Smurf2	5.7407	Bcl9l	5.16047	Smurf2	5.89996
Wwc1	Srebf1	Ttc19	Ubtd2	Rnf145	Rnf187			Rpl6	7.5541	Rab27b	5.34311	Tacc1	7.10079	Rpl6	7.43564	Ryk	6.67251	Rpl6	7.53223
Mat2b	Tom1l2	Ncor1	Fbxw11	Clint1	Snap47			Tacc1	7.28675	Cdk7	5.4811	Txndc5	5.37346	Tacc1	7.23137	Mrgpre	4.22873	Tacc1	7.15983
Gabrb2	Drg2	Elac2	Slit3	Lsm11	Mprip			Txndc5	5.2007	Plcxd3	4.34492	Tmx2	8.19729	Txndc5	5.07043	Tti1	3.67731	Txndc5	5.24243
Slu7	Alkbh5	Shisa6	Pank3	Cyfip2	Flcn			Tmx2	8.14896	Pnpla6	6.14865	Arhgef25	6.92271	Tmx2	8.1995	Zfp574	3.51807	Tmx2	8.20022
Pwwp2a	Llgl1	Gas7	Rars	Cnot6	Rai1			Arhgef25	7.04853	Wdr11	5.48767	Celf2	9.23261	Arhgef25	6.89752	Kdm6a	5.25992	Arhgef25	6.85158
Ttc1	Flii	Myh10	Wwc1	Tbc1d9b	Srebf1			Celf2	9.20267	Prdm8	5.10341	Camk4	7.71117	Celf2	9.27313	Dopey1	6.17933	Celf2	9.36082
Clint1	Tmem11	Ndel1	Slu7	Sqstm1	Gid4			Camk4	7.67826	Smyd3	5.14554	Camsap1	6.94123	Camk4	7.721	Psmc4	5.44841	Camk4	7.86224
Lsm11	Aldh3a2	Ctc1	Ttc1	Canx	Alkbh5			Camsap1	7.00284	Capns1	4.9597	Phkb	5.67096	Camsap1	6.92208	Mbd3	4.91523	Camsap1	6.9516
Cyfip2	Rnf112	Per1	Ublcp1	Zfp354c	Llgl1			Phkb	5.7	Xbp1	2.71589	Sar1a	6.5728	Phkb	5.66269	Ranbp1	4.93829	Phkb	5.74639
Mgat1	Ulk2	Chd3	Rnf145	Hnrnpab	Flii			Sar1a	6.72394	Kcnj4	6.28869	Map4	9.99114	Sar1a	6.51447	Hdgfrp2	5.4997	Sar1a	6.77546
Cnot6	Specc1	Atp1b2	Clint1	Jade2	Smcr8			Map4	10.2059	Dhx57	5.00159	Bbx	6.33513	Map4	10.1763	Cdk9	5.18478	Map4	10.153
Rnf130	Ttc19	Senp3	Lsm11	Cdkn2aipnl	Usp22			Bbx	6.18225	Slmo2	4.41548	Neurod6	6.79727	Bbx	6.28915	Hmgn1	5.8672	Bbx	6.37965
Tbc1d9b	Ncor1	Polr2a	Cyfip2	Ube2b	Rnf112			Neurod6	6.88092	Snx1	4.92626	Vkorc1l1	5.90914	Neurod6	6.76352	Sox5	6.89656	Neurod6	6.94057
Sqstm1	Ubb	Zbtb4	Mgat1	Vdac1	Ulk2			Vkorc1l1	5.91989	Fezf2	3.54387	Ankrd17	8.02082	Vkorc1l1	5.89132	Ak1	5.71529	Vkorc1l1	5.73368
Zfp354c	Pmp22	Fgf11	Cnot6	9530068E07Rik	Specc1			Ankrd17	8.00832	Dync1i1	5.73119	Gpcpd1	6.71474	Ankrd17	8.0663	Kctd5	3.90507	Ankrd17	8.08482
Hnrnpab	Elac2	Nlgn2	Mapk9	Hspa4	Ttc19			Gpcpd1	6.62576	Gpr173	5.18243	Asrgl1	8.50147	Gpcpd1	6.75216	Slc15a4	5.67123	Gpcpd1	6.82784
Jade2	Shisa6	Elp5	Rnf130	Aff4	Ncor1			Asrgl1	8.62836	Srek1	5.16205	Rabgap1l	7.9676	Asrgl1	8.65172	Kctd2	4.122	Asrgl1	8.66077
Cdkn2aipnl	Myh10	Pelp1	Tbc1d9b	Uqcrq	Pmp22			Rabgap1l	7.93317	Chchd10	4.77345	Nyap1	5.66849	Rabgap1l	8.0291	Gpr137	5.56782	Rabgap1l	8.12627
Ppp2ca	Ndel1	Psmb6	Sqstm1	Sowaha	Elac2			Nyap1	5.75615	Igsf21	4.37355	Zfyve16	5.24351	Nyap1	5.7245	Ahdc1	4.9722	Nyap1	5.44633
9530068E07Rik	Ctc1	Pld2	Rufy1	Kif3a	Arhgap44			Zfyve16	5.22154	Gart	3.80796	Arl4a	4.46722	Zfyve16	5.25573	Kazn	4.65482	Zfyve16	5.26734
Hspa4	Vamp2	Mink1	Zfp354c	Acsl6	Map2k4			Arl4a	4.39985	Tubgcp3	4.28587	Tmem184c	6.51214	Arl4a	4.5725	Phkb	6.30662	Arl4a	4.52167
Aff4	Per1	Pfn1	Hnrnpab	Rapgef6	Shisa6			Tmem184c	6.51801	Wdr19	4.31569	Pcbp1	6.25349	Tmem184c	6.34622	Tmem132d	5.81521	Tmem184c	6.39588
Sowaha	Chd3	Spag7	Sec24a	Cdc42se2	Ndel1			Pcbp1	6.47031	Atg9a	2.44613	Zbtb18	8.52418	Pcbp1	6.26055	Alas1	3.73112	Pcbp1	6.36488
Acsl6	Atp1b2	Kif1c	Sar1b	Gpx3	Ctc1			Zbtb18	8.55492	Pdzrn3	4.02208	Ppp1r12a	6.80852	Zbtb18	8.58601	Tbc1d23	5.65044	Zbtb18	8.68244
Rapgef6	Fxr2	Rabep1	Jade2	Gm2a	Per1			Ppp1r12a	6.69444	Lhfp	5.02885	St8sia1	6.43727	Ppp1r12a	6.84284	Ftsj3	5.29608	Ppp1r12a	6.84686
Cdc42se2	Senp3	Nup88	Cdkn2aipnl	Slc36a1	Chd3			St8sia1	6.50228	Hivep3	3.75452	Syt11	10.1985	St8sia1	6.2781	Ubtd2	3.57803	St8sia1	6.48961
Hint1	Polr2a	C1qbp	Ppp2ca	Sparc	Atp1b2			Syt11	10.2798	Uspl1	5.13303	Sort1	10.2132	Syt11	10.0734	Setbp1	7.37977	Syt11	10.1267
Gm2a	Zbtb4	Dhx33	9530068E07Rik	Gria1	Mpdu1			Sort1	10.2451	Cttnbp2	7.32535	Ube2m	6.11713	Sort1	10.0555	Rps6kb1	6.54874	Sort1	10.0865
Slc36a1	Fgf11	Mis12	Hspa4	Sap30l	Senp3			Ube2m	6.24319	Fto	6.97321	Pcdh19	8.04956	Ube2m	6.08319	Zfp385a	3.98476	Ube2m	6.01372
Sparc	Nlgn2	Wscd1	Aff4	Cnot8	Polr2a			Pcdh19	7.9017	Brd9	4.86202	Klhl23	5.70989	Pcdh19	7.88561	Camk1	4.73602	Pcdh19	7.90766
Mfap3	Neurl4	Mybbp1a	Uqcrq	Sh3bp5l	Zbtb4			Klhl23	5.66783	Dusp8	6.24092	Zfp799	5.65359	Klhl23	5.74529	Grsf1	6.25475	Klhl23	5.85135
Sap30l	Eif5a	Spns2	Sowaha	Rnf187	Nlgn2			Zfp799	5.34602	Amotl1	5.76131	Maoa	5.13683	Zfp799	5.66512	Cacng5	2.74762	Zfp799	5.726
Larp1	Ctdnep1	Ankfy1	Kif3a	Snap47	Elp5			Maoa	4.99827	Golga7b	5.18243	Sgip1	7.88389	Maoa	4.82775	Ric8b	4.5161	Maoa	5.09115
Cnot8	Elp5	Zzef1	Rapgef6	Mprip	Acadvl			Sgip1	7.81624	Dgkd	6.17736	Retsat	4.64849	Sgip1	7.88405	N4bp2l2	7.2313	Sgip1	7.83987
Zfp672	Gabarap	Camkk1	Gpx3	Cops3	Dlg4			Retsat	4.27443	Prep	3.77613	Nbr1	7.25435	Retsat	4.53052	Zdhhc23	5.41181	Retsat	4.62993
Sh3bp5l	Dlg4	Rap1gap2	Slc36a1	Med9	Rnasek			Nbr1	7.22839	Mthfd1	4.78416	Cit	6.77908	Nbr1	7.2923	Jup	4.42924	Nbr1	7.21485
Zfp39	Rnasek	Sgsm2	Sparc	Rai1	Pelp1			Cit	6.62017	Cxxc5	4.42235	Tmf1	6.10805	Cit	6.56472	Med28	4.94968	Cit	6.44974
Rnf187	Pelp1	Srr	Gria1	Srebf1	Pld2			Tmf1	6.12495	Ptov1	4.19251	Arf5	4.44432	Tmf1	6.17969	Snx10	6.57656	Tmf1	6.28172
Snap47	Mink1	Rtn4rl1	Mfap3	Alkbh5	Mink1			Arf5	4.87594	Dynlrb1	4.98312	Jak1	7.50596	Arf5	4.65295	Abcc5	5.66433	Arf5	4.59661
Mprip	Slc25a11	Prpf8	Sap30l	Flii	Pfn1			Jak1	7.56637	Dedd	4.42918	Polr2b	5.84282	Jak1	7.50975	Selm	4.67555	Jak1	7.49504
Cops3	Rnf167	Slc43a2	Larp1	Smcr8	Spag7			Polr2b	5.92897	Rps6ka2	5.06442	Extl2	7.08143	Polr2b	5.91802	Gtf2h5	5.5971	Polr2b	5.93815
Rai1	Pfn1	Crk	Cnot8	Usp22	Camta2			Extl2	7.06756	Mrpl12	3.51845	Tbc1d16	6.42562	Extl2	6.83424	Tsc2	6.64999	Extl2	7.04924
Srebf1	Spag7	Abr	Zfp672	Aldh3a2	Kif1c			Tbc1d16	6.81194	Trim28	4.48275	Slc30a9	7.22609	Tbc1d16	6.39382	Ift52	4.56877	Tbc1d16	6.52399
Tom1l2	Camta2	Gosr1	Sh3bp5l	Rnf112	Rabep1			Slc30a9	7.3168	Chmp1a	4.14346	Akirin1	5.83843	Slc30a9	7.28994	Nploc4	5.94327	Slc30a9	7.23123
Gid4	Kif1c	Ankrd13b	Zfp39	Epn2	Nup88			Akirin1	5.88487	Cdk5rap2	5.83008	Srsf1	7.44019	Akirin1	5.94623	Cdkn2aipnl	4.28378	Akirin1	5.87933
Alkbh5	Nup88	Git1	Rnf187	Prpsap2	C1qbp			Srsf1	7.36775	Jazf1	3.85949	Ap3s1	5.72423	Srsf1	7.54707	Cerk	5.67467	Srsf1	7.446
Llgl1	C1qbp	Myo18a	Mprip	Akap10	Dhx33			Ap3s1	5.68721	Ppp1ca	5.03783	Dnajc8	5.56081	Ap3s1	5.67719	Evl	5.52657	Ap3s1	5.87007
Flii	Wscd1	Sez6	Flcn	Specc1	6330403K07Rik			Dnajc8	5.51949	Lta4h	4.38063	Cpsf7	6.10805	Dnajc8	5.56212	Uqcr11	4.83149	Dnajc8	5.60834
Smcr8	Mybbp1a	Phf12	Med9	Ttc19	Wscd1			Cpsf7	6.20634	Rnf26	2.99929	Trmt1	4.87947	Cpsf7	6.18984	Actr8	4.5161	Cpsf7	6.17478
Tmem11	Ube2g1	Flot2	Rai1	Ncor1	Mybbp1a			Trmt1	4.89089	Prdx2	5.89573	Mest	6.34753	Trmt1	4.90781	Rab27b	5.98816	Trmt1	4.68909
Usp22	Zzef1	Aldoc	Srebf1	Ubb	Spns2			Mest	6.42868	Kbtbd7	5.35393	Hint1	5.02164	Mest	6.23791	Cdk7	6.12509	Mest	6.15965
Aldh3a2	Rap1gap2	Pigs	Alkbh5	Pmp22	Ankfy1			Hint1	4.96689	Cops6	4.5088	Myrip	6.54076	Hint1	5.23628	Plcxd3	4.98887	Hint1	5.0466
Rnf112	Rtn4rl1	Poldip2	Llgl1	Elac2	Zzef1			Myrip	6.40806	Fbxo18	5.53598	Arhgap39	7.08976	Myrip	6.40982	Pnpla6	6.79125	Myrip	6.40553
Epn2	Prpf8	Tnfaip1	Flii	Arhgap44	Pafah1b1			Arhgap39	7.37574	Tia1	6.07427	Senp5	5.5898	Arhgap39	7.12698	Wdr11	6.13011	Arhgap39	7.22579
Prpsap2	Slc43a2	Tmem97	Smcr8	Shisa6	Rtn4rl1			Senp5	5.64377	Ncoa7	5.95141	Galnt11	5.31153	Senp5	5.72915	Prdm8	5.74502	Senp5	5.66033
Ulk2	Pitpna	Lyrm9	Tmem11	Myh10	Slc43a2			Galnt11	5.4556	Rnf216	5.4942	Zswim6	5.41529	Galnt11	5.37911	Smyd3	5.78691	Galnt11	5.418
Akap10	Crk	Ksr1	Usp22	Ndel1	Pitpna			Zswim6	5.94874	Pgr	3.8796	Rnf145	7.08791	Zswim6	5.48729	Baiap3	1.29988	Zswim6	5.67103
Specc1	Ywhae	Nf1	Aldh3a2	Vamp2	Crk			Rnf145	6.93508	Atxn7	5.23019	Impad1	7.04002	Rnf145	6.92816	Capns1	5.60072	Rnf145	6.92164
Ttc19	Doc2b	Evi2a	Epn2	Per1	Doc2b			Impad1	6.95565	Mysm1	5.68052	Abcd2	5.66849	Impad1	6.87359	Xbp1	3.35626	Impad1	7.01182
Ncor1	Abr	Utp6	Prpsap2	Chd3	Glod4			Abcd2	5.57142	Sacs	7.33539	Naa15	6.45885	Abcd2	5.65295	Kcnj4	6.92714	Abcd2	5.6222
Elac2	Gosr1	Rhot1	Ulk2	Atp1b2	Abr			Naa15	6.48269	Inpp4b	4.53439	Actn4	6.48153	Naa15	6.63943	Dhx57	5.63992	Naa15	6.60302
Arhgap44	Cpd	5730455P16Rik	Specc1	Fxr2	Cpd			Actn4	6.65669	Acp1	5.51042	Fam171a1	6.886	Actn4	6.63077	Slmo2	5.05366	Actn4	6.70425
Shisa6	Git1	Cdk5r1	Ttc19	Senp3	Git1			Fam171a1	6.86682	Tor1aip2	5.90312	B3galt1	6.44016	Fam171a1	6.80593	Snx1	5.56412	Fam171a1	6.89904
Gas7	Myo18a	Lig3	Ncor1	Polr2a	Myo18a			B3galt1	6.22709	Vps8	5.07754	Kdm1a	5.73606	B3galt1	6.24442	Fezf2	4.18119	B3galt1	6.27998
Myh10	Sez6	Rasl10b	Elac2	Zbtb4	Sez6			Kdm1a	5.69787	Ccnl2	4.84678	Gpr158	8.06653	Kdm1a	5.88717	Dync1i1	6.36735	Kdm1a	5.76151
Ndel1	Phf12	Taf15	Arhgap44	Nlgn2	Phf12			Gpr158	8.12032	Rnf6	4.76806	Sh3glb2	5.9299	Gpr158	7.93269	Gpr173	5.81832	Gpr158	7.92734
Per1	Flot2	Synrg	Map2k4	Eif5a	Pigs			Sh3glb2	6.19885	Ppp2r3a	6.57888	Notch1	6.44738	Sh3glb2	6.20493	Srek1	5.7964	Sh3glb2	6.05519
Chd3	Poldip2	Acaca	Shisa6	Elp5	Poldip2			Notch1	6.32798	Dab2ip	6.09376	Cbx5	8.73644	Notch1	6.43137	Chchd10	5.40769	Notch1	6.40714
Atp1b2	Tnfaip1	Ggnbp2	Ndel1	Dlg4	Lyrm9			Cbx5	8.71539	Shisa4	5.50719	Wnt7b	5.52578	Cbx5	8.786	Igsf21	5.00534	Cbx5	8.83458
Fxr2	Nlk	Usp32	Ctc1	Rnasek	Ksr1			Wnt7b	5.29358	Ldlrad4	5.01073	Fh1	5.45307	Wnt7b	5.19992	Gart	4.43736	Wnt7b	5.32951
Senp3	Ksr1	Rps6kb1	Vamp2	Pelp1	Nf1			Fh1	5.22154	Kdm2a	6.54781	Smarce1	5.16862	Fh1	5.47351	Tubgcp3	4.91523	Fh1	5.44321
Polr2a	Omg	Vmp1	Per1	Mink1	Rab11fip4			Smarce1	5.34602	Ehd1	4.19251	Trim33	6.81523	Smarce1	5.14534	Wdr19	4.944	Smarce1	5.0991
Zbtb4	Evi2a	Trim37	Chd3	Rnf167	Rhot1			Trim33	6.7852	Sh3bp5	4.81058	Prpf40a	6.11713	Trim33	6.86517	Atg9a	3.07343	Trim33	6.80857
Fgf11	Rab11fip4	Ppm1e	Fxr2	Pfn1	Cdk5r1			Prpf40a	6.22267	Gpam	3.76537	Efr3b	7.62085	Prpf40a	6.25895	Pdzrn3	4.64784	Prpf40a	6.22471
Nlgn2	Utp6	Mtmr4	Mpdu1	Spag7	Myo1d			Efr3b	7.61836	Nme1	4.0311	Rnf146	5.93812	Efr3b	7.62268	Lhfp	5.65392	Efr3b	7.59051
Eif5a	Rhot1	Dynll2	Senp3	Camta2	Asic2			Rnf146	5.90709	Stat3	4.85696	Cep19	4.97446	Rnf146	5.93421	Hivep3	4.37956	Rnf146	6.0674
Pelp1	Rhbdl3	Srsf1	Polr2a	Kif1c	Lig3			Cep19	4.9348	Zfp458	4.26309	Chmp5	5.78246	Cep19	5.01443	Uspl1	5.75803	Cep19	5.02172
Mink1	5730455P16Rik	Vezf1	Zbtb4	Rabep1	Rasl10b			Chmp5	5.81999	Dnm3	6.37621	Plxnc1	7.02273	Chmp5	5.71282	Cttnbp2	7.9477	Chmp5	5.849
Pfn1	Cdk5r1	Cuedc1	Nlgn2	Nup88	Synrg			Plxnc1	6.79019	Osbpl1a	3.77613	Peg10	5.26654	Plxnc1	6.76466	Fto	7.59549	Plxnc1	6.7964
Spag7	Asic2	Mrps23	Neurl4	Dhx33	Acaca			Peg10	5.09499	Ubxn6	4.08405	Cox4i1	8.08932	Peg10	5.07043	Brd9	5.48411	Peg10	5.07107
Camta2	Ap2b1	Msi2	Ctdnep1	6330403K07Rik	Ggnbp2			Cox4i1	8.38888	Klf16	3.78682	Dzip3	7.08976	Cox4i1	8.17885	Dusp8	6.8623	Cox4i1	8.11356
Kif1c	Rasl10b	Dgke	Dlg4	Wscd1	Usp32			Dzip3	7.01482	Mtfp1	4.46954	Akr1a1	7.11717	Dzip3	7.15573	Amotl1	6.38215	Dzip3	7.24204
Nup88	Synrg	Mmd	Pelp1	Txndc17	Med13			Akr1a1	7.24011	Acin1	6.40251	Skil	6.98553	Akr1a1	7.13225	Golga7b	5.8027	Akr1a1	7.29753
C1qbp	Usp32	Hlf	Pld2	Mybbp1a	Cltc			Skil	6.97068	Aldh4a1	2.73809	Pdk3	5.15458	Skil	6.99527	Dgkd	6.79757	Skil	7.05436
Dhx33	Appbp2	Stxbp4	Mink1	Ankfy1	Gdpd1			Pdk3	5.16734	Brwd1	6.54781	Zfp941	4.06342	Pdk3	5.23301	Prep	4.39631	Pdk3	5.1838
Mis12	Bcas3	Car10	Pfn1	Zzef1	Trim37			Zfp941	3.87682	Pcnt	4.7131	Mpnd	5.16162	Zfp941	4.23628	Mthfd1	5.40355	Zfp941	4.31186
6330403K07Rik	Med13	Nme2	Camta2	Camkk1	Ppm1e			Mpnd	5.15811	Ndufb10	5.34311	Strbp	8.61639	Mpnd	5.22973	Cxxc5	5.03773	Mpnd	4.94437
Wscd1	Rps6kb1	Nme1	Kif1c	Pafah1b1	Dynll2			Strbp	8.51086	Fip1l1	6.55094	Pgm1	3.34862	Strbp	8.6419	Ptov1	4.80664	Strbp	8.61505
Pitpnm3	Cltc	Spag9	Rabep1	Srr	Vezf1			Pgm1	3.40106	Ppp4r1	4.81058	Zfp142	5.89443	Pgm1	3.4818	Dynlrb1	5.5971	Pgm1	3.39696
Txndc17	Dhx40	Tob1	Nup88	Rtn4rl1	Msi2			Zfp142	5.77036	Stxbp6	6.31477	Nudt18	3.6179	Zfp142	5.71984	Dedd	5.04306	Zfp142	5.73112
Mybbp1a	Trim37	Ankrd40	C1qbp	Rpa1	Akap1			Nudt18	3.92116	Dscr3	3.72148	Kbtbd11	7.76415	Nudt18	4.01823	Rps6ka2	5.6781	Nudt18	4.06625
Spns2	Ppm1e	Cacna1g	Mis12	Prpf8	Dgke			Kbtbd11	7.96617	Med1	6.02321	Uri1	2.68741	Flcn	0.535826	Mrpl12	4.13204	Kbtbd11	7.86982
Ube2g1	Dynll2	Lrrc59	6330403K07Rik	Pitpna	Hlf			Uri1	2.40347	Ggt7	6.60629	Dnajc7	6.55018	Kbtbd11	7.82124	Trim28	5.09529	Uri1	2.28722
Zzef1	Vezf1	Ppp1r9b	Wscd1	Crk	Stxbp4			Dnajc7	6.52999	Nup93	4.57195	Rev1	5.50932	Uri1	2.44837	Chmp1a	4.75563	Dnajc7	6.44974
Camkk1	Mrps23	Samd14	Pitpnm3	Ywhae	Car10			Rev1	5.74386	Sbk1	5.55486	Tpm4	4.85363	Dnajc7	6.51984	Cdk5rap2	6.44186	Rev1	5.52223
Rap1gap2	Dgke	Kat7	Mybbp1a	Glod4	Spag9			Tpm4	4.76273	Rcan1	4.78416	Inpp5b	1.72511	Rev1	5.53052	Jazf1	4.46937	Tpm4	5.07913
Pafah1b1	Mmd	Nxph3	Spns2	Abr	Ankrd40			Inpp5b	1.46929	Las1l	4.59037	Bmpr1a	7.25188	Tpm4	4.7703	Ppp1ca	5.64694	Inpp5b	1.58348
Sgsm2	Hlf	Zfp652	Ube2g1	Gosr1	Cacna1g			Bmpr1a	7.11207	Dusp11	5.32855	Cdip1	7.16524	Inpp5b	1.25572	Poldip2	1.06865	Bmpr1a	7.28973
Srr	Stxbp4	Snf8	Camkk1	Cpd	Lrrc59			Cdip1	7.38434	Msh2	3.95734	Mt3	7.46885	Bmpr1a	7.19657	Lta4h	4.98887	Cdip1	7.33757
Rtn4rl1	Car10	Ube2z	Rap1gap2	Git1	Ppp1r9b			Mt3	7.70703	Golga5	3.91899	Rpl9	7.6599	Cdip1	7.32259	Rnf26	3.6071	Mt3	7.38632
Slc43a2	Nme2	Nfe2l1	Ccdc92b	Myo18a	Samd14			Rpl9	7.73525	Rnf168	5.03783	Fkbp15	5.84719	Mt3	7.59176	Prdx2	6.50113	Rpl9	7.62052
Pitpna	Tob1	Mrpl10	Pafah1b1	Sez6	Pdk2			Fkbp15	5.61931	Mis12	4.78416	Kcng1	5.80735	Rpl9	7.63387	Kbtbd7	5.95745	Fkbp15	5.53108
Crk	Ankrd40	Kpnb1	Sgsm2	Phf12	Kat7			Kcng1	5.58756	Mpp2	5.24577	Sik1	4.17197	Fkbp15	5.53052	Cops6	5.11059	Kcng1	5.28488
Vps53	Cacna1g	Socs7	Srr	Flot2	Slc35b1			Sik1	4.97041	Zfand2a	5.35393	Adcy3	6.50108	Kcng1	5.33712	Fbxo18	6.1376	Sik1	4.50381
Abr	Ppp1r9b	Mllt6	Rtn4rl1	Rpl23a	Nxph3			Adcy3	6.66974	Pfdn2	4.72426	Mgat4a	6.10987	Sik1	4.31256	Tia1	6.67423	Adcy3	6.34496
Gosr1	Samd14	Cacnb1	Slc43a2	Sdf2	Zfp652			Mgat4a	5.91624	Homer1	7.10395	Mef2c	7.12259	Adcy3	6.4526	Ncoa7	6.55061	Mgat4a	5.98397
Git1	Pdk2	Stac2	Pitpna	Aldoc	Snf8			Mef2c	7.00112	Cacnb2	4.89696	Slain2	5.55815	Mgat4a	5.94822	Rnf216	6.09206	Mef2c	6.90586
Myo18a	Kat7	Fbxl20	Crk	Pigs	Nfe2l1			Slain2	5.44804	Rasal1	3.77613	Lrfn2	5.18599	Mef2c	7.10212	Pgr	4.47727	Slain2	5.57165
Sez6	Slc35b1	Ppp1r1b	Doc2b	Vtn	Kpnb1			Lrfn2	5.31035	Polr3h	0.658849	Rps14	7.56555	Slain2	5.54113	Atxn7	5.82761	Lrfn2	4.89953
Phf12	Nxph3	Mien1	Vps53	Poldip2	Socs7			Rps14	7.66853	Inpp5a	3.66467	Canx	9.97674	Lrfn2	5.19321	Mysm1	6.27753	Rps14	7.56848
2610507B11Rik	Zfp652	Ormdl3	Abr	Tnfaip1	Mllt6			Canx	9.9083	Ephb6	6.27358	Wars	5.93196	Rps14	7.6969	Srpk2	2.49114	Canx	10.0074
Aldoc	Snf8	Thra	Gosr1	Nlk	Cacnb1			Wars	5.95941	Tmem97	4.75179	Cd34	5.75014	Canx	9.9381	Sacs	7.93199	Wars	5.92479
Pigs	Nfe2l1	Nr1d1	Ssh2	Lyrm9	Stac2			Cd34	5.41225	Flrt1	6.48685	Mink1	8.2845	Wars	5.92208	Inpp4b	5.13075	Cd34	5.44008
Tnfaip1	Kpnb1	Msl1	Git1	Ksr1	Fbxl20			Mink1	8.47723	Sspn	5.03334	Zc3h14	2.9859	Cd34	5.80593	Acp1	6.10485	Mink1	8.21081
Lyrm9	Npepps	Casc3	Taok1	Evi2a	Ppp1r1b			Zc3h14	3.27004	Elavl4	5.14554	Ywhae	9.00819	Mink1	8.18942	Tor1aip2	6.49726	Zc3h14	3.21865
Ksr1	Socs7	Rapgefl1	Myo18a	Rab11fip4	Psmd3			Ywhae	9.13428	Dok6	5.98196	Epdr1	7.25928	Zc3h14	3.51446	Vps8	5.67123	Ywhae	9.10722
Nf1	Lasp1	Hap1	Sez6	Utp6	Thra			Epdr1	7.22102	Abcf1	5.53914	Dnajc28	3.82713	Ywhae	9.11282	Ccnl2	5.44036	Epdr1	7.15125
Omg	Cacnb1	Cnp	Phf12	5730455P16Rik	Nr1d1			Dnajc28	3.52116	Nav2	7.18091	Rasl11b	4.7265	Epdr1	7.08046	Rnf6	5.36152	Dnajc28	3.14373
Rab11fip4	Rpl19	Stat5b	2610507B11Rik	Zfp207	Msl1			Rasl11b	4.72987	Syf2	4.60855	Ass1	4.16498	Dnajc28	3.65783	Ppp2r3a	7.17174	Rasl11b	4.62993
Utp6	Stac2	Cntnap1	Poldip2	Psmd11	Rapgefl1			Ass1	4.33577	Prmt5	4.19251	Aldh9a1	4.83174	Rasl11b	4.59812	Dab2ip	6.68449	Ass1	3.78001
Rhot1	Fbxl20	Becn1	Lyrm9	Cdk5r1	Igfbp4			Aldh9a1	5.17346	Dcun1d3	4.38767	Vps13c	7.86569	Ass1	4.26216	Shisa4	6.09719	Aldh9a1	4.93106
5730455P16Rik	Mien1	Psme3	Ksr1	Myo1d	Smarce1			Vps13c	7.84481	Rgs8	5.3999	Itsn1	8.30332	Aldh9a1	5.10301	Ldlrad4	5.60072	Vps13c	8.01979
Cdk5r1	Thra	Rpl27	Nf1	Asic2	Hap1			Itsn1	8.36266	Exoc2	5.43769	Coro2b	7.55021	Vps13c	7.862	Kdm2a	7.13728	Itsn1	8.3477
Asic2	Nr1d1	Vat1	Omg	Lig3	Jup			Coro2b	7.63786	Cers2	6.47863	Plekhm3	5.88383	Itsn1	8.30907	Ehd1	4.78136	Coro2b	7.59051
Lig3	Msl1	Rnd2	Evi2a	Ap2b1	Dnajc7			Plekhm3	6.03028	Rassf8	4.70749	Ncor2	8.08145	Coro2b	7.5712	Sh3bp5	5.3994	Plekhm3	6.00105
Rasl10b	Casc3	Mpp2	Rab11fip4	Rasl10b	Stat5b			Ncor2	8.24002	Ipo4	4.0311	Pik3r1	7.73437	Plekhm3	5.85352	Gpam	4.35406	Ncor2	8.08532
Synrg	Rapgefl1	Lsm12	Utp6	Synrg	Stat3			Pik3r1	7.62731	Xrcc5	3.58119	Sec11c	5.7548	Ncor2	8.0324	Nme1	4.61959	Pik3r1	7.74928
Acaca	Wipf2	G6pc3	Rhot1	Acaca	Tubg2			Sec11c	5.72105	Nudt9	4.90189	Abhd4	6.13512	Pik3r1	7.81087	Stat3	5.44439	Sec11c	5.67636
Appbp2	Igfbp4	Tmub2	Rhbdl3	Ggnbp2	Cntnap1			Abhd4	6.08491	Dap3	4.12673	Camk2a	11.8504	Sec11c	5.7034	Zfp458	4.84985	Abhd4	6.01582
Bcas3	Smarce1	Atxn7l3	5730455P16Rik	Usp32	Coa3			Camk2a	12.1887	Hey1	3.29712	Vps45	4.7547	Abhd4	5.84069	Dnm3	6.96272	Camk2a	11.9696
Med13	Eif1	Ubtf	Cdk5r1	Bcas3	Becn1			Vps45	4.78289	Rnf181	4.52165	Cdyl	5.11162	Camk2a	11.782	Osbpl1a	4.36261	Vps45	4.93994
Rps6kb1	Hap1	Grn	Asic2	Vmp1	Psme3			Cdyl	5.45057	Cpped1	4.63245	Ece2	5.2201	Vps45	5.03334	Ubxn6	4.66867	Cdyl	5.24601
Cltc	Acly	Fzd2	Lig3	Cltc	Rpl27			Ece2	5.45811	Thrap3	6.77412	Uap1	5.05226	Cdyl	4.95617	Klf16	4.37111	Ece2	5.16498
Gdpd1	Cnp	Eftud2	Rasl10b	Gdpd1	Rnd2			Uap1	5.08203	Nr3c2	7.366	Snrnp200	7.20581	Ece2	5.09943	Mtfp1	5.05366	Uap1	5.30221
Trim37	Stat5b	Gfap	Synrg	Trim37	Nbr1			Snrnp200	7.10808	Snhg11	8.66594	Ski	7.63736	Uap1	5.14534	Acin1	6.98642	Snrnp200	7.16363
Ppm1e	Stat3	C1ql1	Ggnbp2	Ppm1e	Dhx8			Ski	7.78858	Cltb	5.08188	Ppp2r2d	5.4645	Snrnp200	7.30324	Aldh4a1	3.32161	Ski	7.62741
Dynll2	Atp6v0a1	Hexim1	Usp32	Dynll2	Mpp2			Ppp2r2d	5.56212	Ttc37	4.89696	Ube2h	6.96355	Ski	7.53451	Brwd1	7.13104	Ppp2r2d	5.61112
Cuedc1	Tubg2	Fmnl1	Vmp1	Srsf1	G6pc3			Ube2h	7.01738	Nat14	5.28775	Fundc1	4.94621	Ppp2r2d	5.54641	Pcnt	5.29608	Ube2h	7.15602
Mrps23	Cntnap1	Arf2	Cltc	Vezf1	Atxn7l3			Fundc1	4.75049	Dact3	6.29993	Ilf3	5.74546	Ube2h	6.9522	Ndufb10	5.92607	Fundc1	5.01332
Msi2	Ezh1	Mapt	Trim37	Mrps23	Ubtf			Ilf3	5.89417	Psmd6	4.57811	Plekha3	5.58457	Fundc1	4.94423	Fip1l1	7.13229	Ilf3	5.80105
Akap1	Becn1	Tanc2	Ppm1e	Msi2	Rundc3a			Plekha3	5.70423	Rbm12	4.13512	Usp36	5.26654	Ilf3	5.82775	Ppp4r1	5.39107	Plekha3	5.76651
Dgke	Psme3	Cyb561	Mtmr4	Mmd	Grn			Usp36	5.37819	Rhot1	5.75043	Rcbtb2	1.90363	Plekha3	5.66269	Stxbp6	6.89508	Usp36	5.09513
Hlf	Rpl27	Ace	Dynll2	Hlf	Fzd2			Golph3l	4.18027	Lrrc16a	5.9202	Golph3l	4.47289	Usp36	5.16947	Dscr3	4.30168	Rcbtb2	1.75436
Car10	Vat1	Dcaf7	Cuedc1	Car10	Adam11			Tram1l1	5.37819	Anapc5	6.2448	Tram1l1	5.57933	Rcbtb2	1.53583	Med1	6.60206	Golph3l	4.63541
Nme2	Rnd2	Limd2	Mrps23	Nme2	Gfap			Pogk	7.21064	Ctr9	4.56576	Pogk	7.05616	Golph3l	4.64805	Ggt7	7.18506	Tram1l1	5.36292
Nme1	Mpp3	Ccdc47	Akap1	Nme1	C1ql1			Tob1	5.23623	Lrrtm3	5.96559	Tob1	5.40939	Tram1l1	5.35527	Nup93	5.15063	Pogk	7.11151
Spag9	G6pc3	Ftsj3	Dgke	Spag9	Nmt1			Rps11	7.40205	Zfx	5.79346	Rps11	7.23946	Pogk	7.24523	Sbk1	6.13261	Tob1	5.42751
Tob1	Atxn7l3	Psmc5	Mmd	Tob1	Hexim1			Pdia6	7.07084	Plcg1	5.63689	Pdia6	7.32893	Tob1	5.39382	Rcan1	5.36152	Rps11	7.35511
Luc7l3	Ubtf	Tex2	Hlf	Ankrd40	Fmnl1			Arf6	5.51467	Kcnh2	4.50233	Arf6	5.74077	Rps11	7.44978	Las1l	5.16537	Pdia6	7.48294
Ankrd40	Rundc3a	Ddx5	Stxbp4	Cacna1g	Mapt			Lrpap1	7.60935	Necap1	4.56576	Lrpap1	7.47168	Pdia6	7.4091	Dusp11	5.90281	Arf6	5.5887
Cacna1g	Grn	Cacng5	Car10	Lrrc59	Tlk2			Gria3	7.82404	Gapdh	5.76672	Gria3	7.81637	Arf6	5.38207	Msh2	4.53135	Lrpap1	7.5048
Ppp1r9b	Fzd2	Prkca	Spag9	Ppp1r9b	Cyb561			Drg1	5.46811	Ncoa3	5.03783	Drg1	5.51758	Lrpap1	7.52653	Golga5	4.49292	Gria3	7.80747
Samd14	Adam11	Axin2	Tob1	Samd14	Dcaf7			Carkd	4.88717	Pip5k1a	4.67334	Carkd	4.90905	Gria3	7.80867	Rnf168	5.61151	Drg1	5.63046
Pdk2	Eftud2	Amz2	Luc7l3	Pdk2	Limd2			Smg5	5.85661	Tmem181a	6.16922	Smg5	5.87956	Drg1	5.73609	Mis12	5.35724	Carkd	4.81514
Kat7	Gfap	Prkar1a	Ankrd40	Kat7	Ccdc47			Bckdk	4.46619	Acss2	5.53598	Bckdk	4.49535	Carkd	4.89546	Mpp2	5.81832	Smg5	5.90224
Slc35b1	Hexim1	Map2k6	Cacna1g	Slc35b1	Ddx42			Nars	6.96186	Kitl	4.30086	Nars	6.92167	Smg5	5.79489	Zfand2a	5.92607	Bckdk	4.34568
Nxph3	Fmnl1	Kcnj16	Ppp1r9b	Nxph3	Ftsj3			Atxn7	5.94695	Stau1	5.30644	Atxn7	5.93401	Bckdk	4.26216	Pfdn2	5.29608	Nars	7.05232
Phb	Nsf	Sox9	Samd14	Zfp652	Tex2			Eif1	7.58945	Usp48	6.45538	Eif1	7.42419	Nars	7.11815	Homer1	7.67572	Atxn7	5.97535
Zfp652	Crhr1	Sstr2	Pdk2	Snf8	Ddx5			Cckbr	3.55907	Mtch1	5.07754	Cckbr	4.03304	Atxn7	5.79045	Cacnb2	5.46835	Eif1	7.76624
Snf8	Mapt	Cog1	Nxph3	Nfe2l1	Cacng5			Clk1	4.14953	Ttbk1	6.30179	Clk1	4.2794	Eif1	7.64128	Rasal1	4.34546	Cckbr	3.49666
Ube2z	Tanc2	Tmem104	Phb	Sp2	Prkca			Tm2d3	4.72571	Stam2	4.88209	Tm2d3	4.61811	Cckbr	3.57766	Polr3h	1.22685	Clk1	4.15285
Nfe2l1	Cyb561	Grin2c	Zfp652	Kpnb1	Axin2			Brwd1	7.45579	Baz2b	6.24674	Brwd1	7.4596	Clk1	4.31256	Inpp5a	4.22873	Tm2d3	4.62443
Kpnb1	Ace	Kctd2	Snf8	Npepps	Gna13			Bmpr2	7.84721	Auh	4.84678	Bmpr2	7.79163	Tm2d3	4.56732	Ephb6	6.83645	Brwd1	7.47455
Npepps	Dcaf7	Gga3	Ube2z	Socs7	Amz2			Tnrc6a	6.8921	Vapa	5.7173	Tnrc6a	6.90184	Brwd1	7.44838	Tmem97	5.31382	Bmpr2	7.72636
Socs7	Ccdc47	Mrps7	Nfe2l1	Mllt6	Prkar1a			Zwint	8.55785	Khdrbs1	5.09053	Zwint	8.52554	Bmpr2	7.76692	Flrt1	7.04867	Tnrc6a	6.69902
Mllt6	Ddx42	Slc25a19	Kpnb1	Pip4k2b	Sox9			Ppp1r9a	8.41302	Pcmtd1	7.2769	Ppp1r9a	8.3864	Tnrc6a	6.75101	Sspn	5.59347	Zwint	8.50674
Lasp1	Ftsj3	Acox1	Socs7	Lasp1	Cog1			Tmem115	5.00515	Ttc39b	5.72009	Tmem115	5.07481	Zwint	8.63851	Elavl4	5.70524	Ppp1r9a	8.49775
Cacnb1	Psmc5	Rnf157	Mllt6	Cacnb1	Ttyh2			Asb8	4.75049	Tusc2	4.52165	Asb8	4.5923	Ppp1r9a	8.50603	Dok6	6.54122	Tmem115	4.94877
Stac2	Tex2	Cygb	Plxdc1	Stac2	Grin2c			Cnpy3	5.81999	Dhdds	4.42235	Cnpy3	5.56347	Tmem115	4.96408	Abcf1	6.09719	Asb8	4.64631
Fbxl20	Ddx5	Mgat5b	Cacnb1	Fbxl20	Gga3			Lrp10	5.94158	Tmbim4	5.07754	Lrp10	6.00617	Asb8	4.6963	Nav2	7.73865	Cnpy3	5.6139
Cdk12	Psmd12	Sec14l1	Rpl19	Ppp1r1b	Mrps7			Car8	3.40106	Hint1	4.81581	Car8	3.3609	Cnpy3	5.6183	Syf2	5.16537	Lrp10	5.88854
Ppp1r1b	Cacng5	Cyth1	Stac2	Ormdl3	Slc25a19			Tox2	4.11177	Cacnb1	4.76266	Tox2	4.3114	Lrp10	5.6796	Prmt5	4.74912	Car8	3.76008
Ormdl3	Axin2	Timp2	Fbxl20	Med24	Grb2			Taldo1	5.64817	Tarsl2	4.07536	Taldo1	5.2698	Car8	3.54641	Dcun1d3	4.944	Tox2	4.18309
Thra	Amz2	Lgals3bp	Med1	Thra	Srp68			Sorbs2	7.94843	Mtpap	4.67908	Sorbs2	7.98556	Tox2	4.26855	Rgs8	5.95462	Taldo1	5.51927
Nr1d1	Prkar1a	Rbfox3	Cdk12	Nr1d1	Exoc7			Nxph1	5.40965	Pfkfb2	4.42918	Nxph1	5.59501	Taldo1	5.46797	Exoc2	5.99092	Sorbs2	8.06972
Msl1	Abca5	Gaa	Ppp1r1b	Msl1	Rnf157			Ywhaz	9.76878	Zmym2	5.38942	Ywhaz	9.90333	Sorbs2	7.96948	Cers2	7.03135	Nxph1	5.45256
Rapgefl1	Kcnj16	Eif4a3	Psmd3	Casc3	Ube2o			Naca	6.89488	Snx3	5.35752	Naca	6.83408	Nxph1	5.4568	Rassf8	5.25992	Ywhaz	9.79874
Igfbp4	Sox9	Nptx1	Thra	Rapgefl1	Srsf2			Chn1	9.38109	P4htm	6.23313	Chn1	9.33169	Ywhaz	9.87935	Ipo4	4.58347	Naca	6.8979
Smarce1	Sstr2	Baiap2	Msl1	Wipf2	Mgat5b			Rheb	6.03702	Prkag2	6.52405	Rheb	5.91123	Naca	6.9332	Xrcc5	4.13204	Chn1	9.44864
Hap1	Ttyh2	Aatk	Rapgefl1	Igfbp4	Cyth1			Smoc1	4.18027	Atp13a2	6.11936	Smoc1	4.796	Chn1	9.3863	Nudt9	5.45242	Rheb	6.10935
Klhl11	Grin2c	Bahcc1	Wipf2	Smarce1	Usp36			Gabrb1	7.12556	Aqr	5.53914	Gabrb1	7.09345	Rheb	6.07043	Dap3	4.67555	Smoc1	4.25604
Cnp	Kctd2	Nploc4	Igfbp4	Eif1	Timp2			Nucb1	6.52521	2900026A02Rik	5.91777	Nucb1	6.68939	Smoc1	4.24279	Hey1	3.84532	Gabrb1	7.17119
Stat5b	Gga3	Mrpl12	Smarce1	Hap1	Lgals3bp			Trrap	8.22757	Tra2a	4.88209	Trrap	8.22779	Gabrb1	7.09223	Rnf181	5.06941	Nucb1	6.46213
Stat3	Slc25a19	Arhgdia	Hap1	Jup	Rbfox3			Pigu	5.35143	Nos1	5.9866	Pigu	5.50103	Nucb1	6.72915	Cpped1	5.17995	Trrap	8.27057
Tubg2	Srp68	Pcyt2	Klhl11	Cnp	Tbc1d16			Hnrnpul1	7.04269	Srsf6	5.9773	Hnrnpul1	6.84723	Trrap	8.20368	Thrap3	7.32067	Pigu	5.42751
Cntnap1	Exoc7	Rfng	Kat2a	Stat5b	Gaa			Atp5g1	5.91259	Mettl16	5.09484	Atp5g1	5.68079	Pigu	5.31874	Nr3c2	7.91247	Hnrnpul1	6.92835
Coa3	Cygb	Fasn	Rab5c	Atp6v0a1	Nptx1			Pnrc1	6.28338	Tiprl	4.41548	Pnrc1	6.15994	Hnrnpul1	6.86517	Snhg11	9.21021	Atp5g1	5.77149
Becn1	Srsf2	Csnk1d	Stat5b	Tubg2	Rptor			Parvb	4.52004	Peli1	5.02885	Parvb	4.57658	Atp5g1	5.7971	Cltb	5.62579	Pnrc1	6.40071
Psme3	Mgat5b	Foxk2	Stat3	Cntnap1	Baiap2			Ggnbp2	6.13283	Hspbp1	2.39117	Ggnbp2	6.10075	Pnrc1	6.32643	Ttc37	5.44036	Parvb	4.48572
Rpl27	Sec14l1	Asxl2	Tubg2	Ezh1	Slc38a10			Slc39a3	6.17158	Cby1	4.04897	Slc39a3	5.86454	Parvb	4.64313	Nat14	5.8307	Ggnbp2	6.31795
Vat1	Cyth1	Dtnb	Cntnap1	Psme3	Bahcc1			Clcn7	6.31419	Ccdc85c	3.08837	Clcn7	6.27961	Ggnbp2	6.23301	Dact3	6.84258	Slc39a3	5.92702
Rnd2	Usp36	Dnajc27	Ezh1	Rnd2	Nploc4			Gtpbp1	5.41999	Kctd20	5.36467	Gtpbp1	5.41529	Slc39a3	5.96998	Psmd6	5.12071	Clcn7	6.17854
Dhx8	Timp2	Adcy3	Becn1	Dhx8	Mrpl12			Pde7a	5.04243	Shc2	4.02208	Pde7a	5.25342	Clcn7	6.18309	Rbm12	4.67555	Gtpbp1	5.17254
G6pc3	Lgals3bp	Ptrhd1	Rpl27	Mpp2	Arhgdia			Ssr1	7.97013	Zc3h7b	7.85727	Ssr1	7.9776	Gtpbp1	5.17969	Rhot1	6.28879	Pde7a	5.31592
Tmub2	Rbfox3	Ncoa1	Vat1	G6pc3	Anapc11			BC031181	2.10343	Ppp1cc	5.43089	BC031181	2.15001	Pde7a	5.06676	Lrrc16a	6.45791	Ssr1	7.90199
Atxn7l3	Tbc1d16	Klhl29	Rnd2	Tmub2	Pcyt2			Ints10	5.87926	Mpdu1	4.4495	Ints10	5.84282	Ssr1	7.81087	Anapc5	6.78013	BC031181	1.7135
Ubtf	Gaa	Rhob	Nbr1	Atxn7l3	Rfng			Pex13	5.33514	Mum1	3.20451	Pex13	5.48988	BC031181	2.14881	Atp11a	2.21719	Ints10	6.01372
Rundc3a	Eif4a3	Pum2	Dhx8	Ubtf	Gps1			Tm2d2	5.38348	Med14	6.07862	Tm2d2	5.37649	Ints10	5.94623	Ctr9	5.10041	Pex13	5.20974
Grn	Nptx1	Rdh14	Mpp3	Rundc3a	Fasn			Cacybp	5.79042	Max	5.02434	Cacybp	5.71229	Pex13	5.27492	Lrrtm3	6.4992	Tm2d2	5.43066
Fzd2	Aatk	Vsnl1	G6pc3	Grn	Foxk2			Exoc4	6.7333	Myef2	6.35482	Exoc4	6.8764	Tm2d2	5.45119	Zfx	6.32424	Cacybp	6.0775
Adam11	Bahcc1	Ddx1	Tmub2	Fzd2	Rab10			Pdpk1	7.39617	Osbpl9	5.37533	Pdpk1	7.4373	Cacybp	5.93621	Plcg1	6.16718	Exoc4	6.80128
Eftud2	Nploc4	Lpin1	Atxn7l3	Adam11	Dnajc27			Celsr2	9.92098	Atp6v1h	6.38327	Celsr2	9.844	Exoc4	6.79489	Kcnh2	5.03238	Pdpk1	7.39765
Gfap	Mrpl12	Ntsr2	Ubtf	Eftud2	Adcy3			Nos1	6.8687	Zc3h18	4.27832	Nos1	6.92685	Pdpk1	7.42494	Necap1	5.09529	Celsr2	9.69531
C1ql1	Pcyt2	E2f6	Rundc3a	Nmt1	Ptrhd1			Jmy	6.50228	Nfs1	4.10981	Jmy	6.45026	Celsr2	9.66391	Gapdh	6.29551	Nos1	7.00865
Hexim1	Rfng	Rock2	Grn	Hexim1	Ncoa1			Rps15	8.50814	Copg2	5.8145	Rps15	8.33596	Nos1	7.0594	Ncoa3	5.56412	Jmy	6.6086
Fmnl1	Gps1	Kcnf1	Fzd2	Fmnl1	Fkbp1b			Zfp512	5.05243	Vps13b	7.40901	Zfp512	5.07107	Jmy	6.62205	Pip5k1a	5.19917	Rps15	8.32414
Plekhm1	Fasn	Mboat2	Adam11	Nsf	Ubxn2a			Megf9	8.22573	Rhbdd1	4.66177	Megf9	8.24983	Rps15	8.33598	Tmem181a	6.69469	Zfp512	5.2953
Gosr2	Foxk2	Kidins220	Gfap	Arf2	Klhl29			Scaf4	5.84706	Baiap2	5.87585	Scaf4	5.83403	Zfp512	5.32489	Acss2	6.06088	Megf9	8.09628
Mapt	Rab10	Id2	Hexim1	Mapt	Rhob			Syt4	8.22352	Polr3a	4.75724	Syt4	8.21685	Megf9	8.05386	Kitl	4.82532	Scaf4	5.83953
Cdc27	Asxl2	Cmpk2	Tanc2	Cdc27	Pum2			Zfp651	6.73847	Nefm	5.73119	Zfp651	6.64488	Scaf4	5.90165	Stau1	5.8307	Syt4	8.14607
Tlk2	Dtnb	Sox11	Cyb561	Tanc2	Wdr35			Sox4	4.67482	Zfp180	5.265	Sox4	4.73596	Syt4	8.01918	Usp48	6.97949	Zfp651	6.56763
Tanc2	Dnajc27	Myt1l	Dcaf7	Cyb561	Rdh14			Kremen1	4.84175	Uba2	5.09053	Kremen1	4.70739	Zfp651	6.51042	Mtch1	5.60072	Sox4	4.62443
Cyb561	Adcy3	Dld	Limd2	Ace	Trib2			Pebp1	7.54469	Keap1	4.04006	Pebp1	7.46743	Sox4	4.71047	Ttbk1	6.82413	Kremen1	4.73575
Ace	Ptrhd1	Atxn7l1	Ccdc47	Dcaf7	Lpin1			Nsmf	9.83196	Ddx1	6.31108	Nsmf	9.46016	Kremen1	4.63325	Stam2	5.40355	Pebp1	7.49278
Dcaf7	Ubxn2a	Snx13	Ftsj3	Limd2	Ntsr2			Galnt1	6.57809	Fig4	3.64131	Galnt1	6.66112	Pebp1	7.53451	Baz2b	6.76731	Nsmf	9.51014
Limd2	Rhob	Dgkb	Tex2	Ccdc47	Rock2			Syndig1l	2.59812	Lztr1	5.32489	Syndig1l	2.09225	Nsmf	9.39674	Auh	5.36578	Galnt1	6.62246
Ccdc47	Laptm4a	Arl4a	Cacng5	Ftsj3	Odc1			Irf2bpl	5.16427	Zdhhc18	4.10127	Irf2bpl	5.30201	Galnt1	6.55297	Vapa	6.23626	Syndig1l	2.14081
Ddx42	Smc6	Nrcam	Axin2	Psmc5	Asap2			Pcna	4.60405	Dlgap2	6.33494	Pcna	4.7686	Syndig1l	1.6963	Khdrbs1	5.60792	Irf2bpl	5.23523
Ftsj3	Ddx1	Stxbp6	Prkar1a	Tex2	Ywhaq			Podxl	5.26806	Tuba4a	6.02547	Podxl	5.4502	Irf2bpl	5.30324	Pcmtd1	7.79343	Pcna	4.68381
Tex2	Ntsr2	Foxg1	Map2k6	Ddx5	Kidins220			Wrnip1	4.14953	Pbx2	3.72148	Wrnip1	4.17197	Pcna	4.72915	Ttc39b	6.23626	Podxl	5.44321
Ddx5	Rock2	Strn3	Kcnj16	Cacng4	Id2			Csnk1d	6.84875	Mpped2	3.2821	Csnk1d	6.74082	Podxl	5.5569	Tusc2	5.03773	Wrnip1	4.15285
Smurf2	Kcnf1	Hectd1	Sox9	Cacng5	Cmpk2			Got2	7.18283	Ccdc88a	5.59494	Got2	7.28931	Wrnip1	4.37319	Dhdds	4.93829	Csnk1d	6.77794
Pitpnc1	Adam17	Akap6	Sstr2	Axin2	Sox11			Akirin2	5.41225	Thumpd1	3.79743	Akirin2	5.35823	Csnk1d	6.72334	Tmbim4	5.59347	Got2	7.20198
Cacng5	Mboat2	Npas3	Ttyh2	Amz2	Acp1			Laptm4b	6.79118	Atg5	3.38415	Laptm4b	6.886	Got2	7.25008	Hint1	5.33135	Akirin2	5.32273
Axin2	Kidins220	Sptssa	Slc9a3r1	Prkar1a	Cbll1			Ncoa4	6.30446	Zcchc11	5.87585	Ncoa4	6.46028	Akirin2	5.38501	Cacnb1	5.27811	Laptm4b	6.82784
Gna13	Id2	Eapp	Grin2c	Abca5	Gpr22			Brsk2	7.25751	Slc39a1	6.21346	Brsk2	7.13068	Laptm4b	6.84926	Tarsl2	4.59077	Ncoa4	5.99679
Amz2	Sox11	Snx6	Fads6	Kcnj16	Atxn7l1			Klhl2	7.82209	Dnaja4	4.75724	Klhl2	7.63609	Ncoa4	6.38649	Mtpap	5.19439	Brsk2	7.01707
Prkar1a	Lamb1	Cfl2	Gga3	Sox9	Snx13			Fam131b	6.6391	Ift122	4.75724	Fam131b	6.57807	Brsk2	7.05755	Pfkfb2	4.944	Klhl2	7.70893
Kcnj16	Dld	Nfkbia	Mrps7	Sstr2	Tspan13			Bcl6	5.78643	Slc25a44	6.78615	Bcl6	5.76639	Klhl2	7.71164	Zmym2	5.90281	Fam131b	6.50316
Sox9	Cbll1	Ralgapa1	Sap30bp	Tmem104	Etv1			Dis3l	4.77888	Cdc42se1	5.37886	Dis3l	4.68802	Fam131b	6.47213	Snx3	5.8702	Bcl6	6.04081
Ttyh2	Atxn7l1	Sstr1	Rnf157	Grin2c	Arl4a			Kif5a	12.2364	Bms1	5.20651	Kif5a	12.083	Bcl6	5.83639	P4htm	6.7446	Dis3l	4.56825
Grin2c	Snx13	Sec23a	Ube2o	Slc25a19	Nrcam			Ttl	5.53384	Rrp7a	4.67908	Ttl	5.33662	Dis3l	4.71047	Prkag2	7.03536	Kif5a	12.0243
Gga3	Tspan13	Trappc6b	Cygb	Grb2	Foxg1			Mfsd5	4.3735	Cc2d1a	2.55016	Mfsd5	4.36116	Kif5a	12.0893	Atp13a2	6.63065	Ttl	5.35298
Mrps7	Etv1	Pnn	Srsf2	Srsf2	Strn3			Vcam1	6.37788	Camkk2	5.58272	Vcam1	6.61315	Ttl	5.28127	Aqr	6.05033	Mfsd5	4.12974
Grb2	Arl4a	Fbxo33	Mgat5b	Mgat5b	Hectd1			Mrpl10	5.16119	Taf2	4.75724	Mrpl10	5.02551	Mfsd5	4.24927	2900026A02Rik	6.42767	Vcam1	6.55757
Sap30bp	Lrrn3	Mdga2	Cyth1	Sec14l1	Akap6			Psme4	6.79218	Ndufv3	4.99699	Psme4	6.63733	Vcam1	6.65295	Tra2a	5.39107	Mrpl10	5.06702
Srp68	Pnpla8	Rps29	Usp36	Cyth1	Npas3			Lpl	3.63203	Gnb4	3.90924	Lpl	3.73577	Mrpl10	5.07773	Nos1	6.49532	Psme4	6.84331
Exoc7	Nrcam	Rpl36al	Timp2	Usp36	Eapp			Fgf14	1.88202	Specc1	7.21593	Fgf14	1.47689	Psme4	6.7407	Srsf6	6.48557	Lpl	3.55565
Rnf157	Stxbp6	Mgat2	Rbfox3	Timp2	Snx6			Ddx50	5.81217	Ube2v1	0.749048	Ddx50	6.01785	Lpl	3.5569	Cyb5b	1.06865	Fgf14	2.04525
Ube2o	Nova1	Klhdc2	Gaa	Lgals3bp	Nfkbia			Appl2	6.96715	Mat2a	6.30737	Appl2	7.00229	Fgf14	2.00296	Mettl16	5.60072	Ddx50	6.19718
Cygb	Foxg1	Arf6	Nptx1	Tbc1d16	Ralgapa1			Cnih3	5.62155	Bag4	6.03222	Cnih3	5.44155	Ddx50	6.09403	Tiprl	4.92103	Appl2	6.98202
Srsf2	Scfd1	Sos2	Rptor	Gaa	Brms1l			Tomm70a	7.2945	Mapre3	5.68338	Tomm70a	7.19556	Appl2	6.93421	Peli1	5.53416	Cnih3	5.53695
Mgat5b	Coch	Atl1	Baiap2	Eif4a3	Sstr1			Eif3m	5.40185	Ski	6.952	Eif3m	5.44732	Cnih3	5.35827	Hspbp1	2.89634	Tomm70a	7.29233
Cyth1	Strn3	Trim9	Aatk	Nptx1	Trappc6b			Usp53	5.99787	Rptor	6.04341	Usp53	5.50103	Tomm70a	7.19657	Cby1	4.55392	Eif3m	5.44633
Timp2	Hectd1	Tmx1	Slc38a10	Baiap2	Pnn			Zfp365	8.80587	Mtmr7	4.75724	Zfp365	8.5702	Eif3m	5.39089	Ccdc85c	3.59264	Usp53	5.66301
Lgals3bp	Akap6	Rtn1	Bahcc1	Aatk	Mdga2			Ppp1r14c	3.94998	Ndufa12	5.13303	Ppp1r14c	4.10052	Usp53	5.51446	Kctd20	5.8672	Zfp365	8.66211
Rbfox3	Npas3	Hif1a	Nploc4	Slc38a10	Rps29			Rpl24	6.07021	Ephx4	5.01073	Rpl24	6.21002	Zfp365	8.50806	Shc2	4.52374	Ppp1r14c	4.16047
Tbc1d16	Eapp	Snapc1	Mrpl12	Bahcc1	Klhdc2			Nos1ap	5.05243	Csnk2a2	4.52165	Nos1ap	4.88374	Ppp1r14c	4.10659	Zc3h7b	8.35842	Rpl24	6.07347
Gaa	Snx6	Kcnh5	P4hb	Mrpl12	Arf6			Jun	5.75615	Ckmt1	5.30272	Jun	5.78702	Rpl24	6.04643	Ppp1cc	5.93182	Nos1ap	4.90861
Eif4a3	Cfl2	Sgpp1	Arhgdia	P4hb	Sos2			Sec22b	5.02899	Grb2	6.14865	Sec22b	4.96242	Nos1ap	4.862	Mpdu1	4.94968	Jun	5.73368
Nptx1	Ralgapa1	Akap5	Rfng	Arhgdia	Atl1			Rbm10	5.45057	Tdrd3	5.28021	Rbm10	5.46165	Jun	5.90165	Mum1	3.70447	Sec22b	5.21341
Baiap2	Brms1l	Hspa2	Fasn	Pcyt2	Map4k5			Abcf3	4.87219	Crmp1	3.96676	Abcf3	5.01777	Sec22b	5.25573	Med14	6.5784	Rbm10	5.3563
Aatk	Sstr1	Max	Foxk2	Rfng	Trim9			Ndufb11	5.40965	Snph	8.42769	Ndufb11	5.33973	Rbm10	5.45119	Max	5.52276	Abcf3	4.96192
Bahcc1	Trappc6b	Fut8	Rab10	Gps1	Actr10			Ensa	7.18435	Dusp22	3.12252	Ensa	7.15557	Abcf3	4.88717	Myef2	6.85323	Ndufb11	5.22072
Nploc4	Pnn	Gphn	Kif3c	Fasn	Arid4a			Zfx	5.4706	Psmd4	5.17024	Zfx	5.59501	Ndufb11	5.36425	Osbpl9	5.8732	Ensa	7.2276
Mrpl12	Fbxo33	Atp6v1d	Asxl2	Csnk1d	Daam1			Pacsin3	4.24566	Myl12b	6.08513	Pacsin3	3.90469	Ensa	7.22152	Atp6v1h	6.88028	Zfx	5.82042
P4hb	Klhl28	Vti1b	Dtnb	Foxk2	Rtn1			Rtcb	5.53622	Tfam	4.73534	Rtcb	5.48147	Zfx	5.64559	Zc3h18	4.77497	Pacsin3	3.95672
Arhgdia	Mdga2	Zfp36l1	Dnajc27	Rab10	Ppm1a			Rnf144a	5.6613	Ppp2r5b	4.9597	Rnf144a	5.41234	Pacsin3	3.62828	Nfs1	4.60525	Rtcb	5.50737
Pcyt2	Rps29	Actn1	Ptrhd1	Asxl2	Hif1a			Nfyb	4.97742	Ube2g1	5.11618	Nfyb	4.78236	Rtcb	5.6963	Copg2	6.30884	Rnf144a	5.74386
Rfng	Mgat2	Dcaf5	Itsn2	Dtnb	Snapc1			Cyfip1	7.27042	Raver2	5.17024	Cyfip1	7.32109	Rnf144a	5.69155	Vps13b	7.90298	Nfyb	5.13822
Fasn	Arf6	Galnt16	Ubxn2a	Dnajc27	Syt16			Fbxl17	6.38318	Caly	7.39772	Fbxl17	6.1998	Nfyb	5.11015	Rhbdd1	5.15556	Cyfip1	7.45144
Csnk1d	Sos2	Smoc1	Klhl29	Adcy3	Dbpht2			Slc25a4	8.28419	Trpm7	2.8027	Slc25a4	8.0847	Cyfip1	7.33712	Baiap2	6.36948	Fbxl17	6.30254
Narf	Trim9	Synj2bp	Rhob	Ptrhd1	Kcnh5			Atp5h	6.61568	Sub1	6.94009	Atp5h	6.5582	Fbxl17	6.35075	Polr3a	5.25074	Slc25a4	8.22041
Foxk2	Tmx1	Map3k9	Pum2	Ncoa1	Ppp2r5e			Atp5b	9.16897	Rsl24d1	3.96676	Atp5b	9.08725	Slc25a4	8.17374	Nefm	6.22459	Atp5h	6.63756
Fn3krp	Actr10	Sipa1l1	Rdh14	Ubxn2a	Sgpp1			Cherp	5.57836	Rps12	5.92263	Cherp	5.75945	Atp5h	6.55166	Zfp180	5.75803	Atp5b	9.17415
Rab10	Psma3	Zfyve1	Smc6	Rhob	Akap5			Dtx1	5.85851	Rap1b	3.97613	Dtx1	5.79383	Atp5b	9.18372	Uba2	5.58253	Cherp	5.56306
Kif3c	Daam1	Rbm25	Lpin1	Pum2	Hspa2			Pik3r3	5.62602	Prps2	4.99238	Pik3r3	5.90285	Cherp	5.36425	Keap1	4.53135	Dtx1	5.53401
Dtnb	Rtn1	Psen1	Rock2	Laptm4a	Rab15			Timp4	5.34331	Rnf123	5.36467	Timp4	5.1756	Dtx1	5.862	Ddx1	6.80229	Pik3r3	5.88624
Dnajc27	Pcnx4	Dnal1	Kcnf1	Vsnl1	Max			Atg2a	5.51949	Nfx1	5.88831	Atg2a	5.67343	Pik3r3	5.92816	Fig4	4.13204	Timp4	5.17254
Adcy3	Ppm1a	Syndig1l	Odc1	Ddx1	Fut8			Polr2g	4.29142	Fbxo31	5.34311	Polr2g	4.33649	Timp4	5.4596	Lztr1	5.81521	Atg2a	5.39234
Ptrhd1	Snapc1	Arel1	Asap2	Ntsr2	Gphn			Tbc1d1	5.53859	Pja1	5.14138	Tbc1d1	5.52578	Atg2a	5.44273	Zdhhc18	4.59077	Polr2g	4.54515
Ncoa1	Dbpht2	Ylpm1	Ywhaq	Kcnf1	Vti1b			Aup1	4.71735	Rai1	4.94069	Aup1	4.85363	Polr2g	4.65295	Dlgap2	6.82413	Tbc1d1	5.48022
Itsn2	Kcnh5	Dlst	Mboat2	Pdia6	Zfp36l1			Nolc1	5.41225	Chid1	6.52086	Nolc1	5.2698	Tbc1d1	5.53052	Tuba4a	6.51462	Aup1	4.12196
Klhl29	Akap5	Mlh3	Kidins220	Odc1	Actn1			Syn2	8.81275	Zdhhc6	3.41203	Syn2	8.81164	Aup1	4.74758	Pbx2	4.20991	Nolc1	5.35298
Rhob	Sptb	Tmed10	Id2	Cpsf3	Galnt16			Apoe	10.5414	Rundc3b	4.28587	Apoe	10.435	Nolc1	5.32796	Mpped2	3.7702	Syn2	8.80358
Wdr35	Max	Fos	Cmpk2	Mboat2	Ttc9			Raly	1.2081	Sumf1	6.23313	Raly	1.33467	Syn2	8.81661	Ccdc88a	6.08174	Apoe	10.4673
Rdh14	Vti1b	Tgfb3	Sox11	Kidins220	Map3k9			Pmpcb	4.9384	Rnf165	5.92263	Pmpcb	5.16162	Apoe	10.5372	Thumpd1	4.28378	Pmpcb	5.20238
Smc6	Rdh11	Irf2bpl	Lamb1	Id2	Sipa1l1			Osbpl2	5.35413	Ap2a1	6.01869	Osbpl2	5.53394	Raly	1.20325	Atg5	3.86952	Osbpl2	5.30221
Trib2	Zfp36l1	Nrxn3	Dld	Sox11	Psen1			Sh3glb1	6.67945	Ube2v2	5.55798	Sh3glb1	6.73964	Pmpcb	4.92411	Zcchc11	6.36097	Sh3glb1	6.80978
Lpin1	Actn1	Dio2	Cbll1	Lamb1	Dnal1			Dynlrb1	5.74386	Setd5	7.25686	Dynlrb1	5.67343	Osbpl2	5.37319	Slc39a1	6.69807	Dynlrb1	5.81318
Ntsr2	Exd2	Gtf2a1	Gpr22	Dld	Syndig1l			Galnt9	5.35682	Jun	4.70749	Galnt9	5.40643	Sh3glb1	6.74758	Dnaja4	5.2415	Galnt9	5.42435
E2f6	Galnt16	Ston2	Prkar2b	Cbll1	Ylpm1			Clpb	5.44804	Rdh14	5.32122	Clpb	5.16513	Dynlrb1	5.6233	Ift122	5.2415	Clpb	5.30221
Rock2	Susd6	Zc3h14	Atxn7l1	Gpr22	Mlh3			Usmg5	6.93688	Spns2	5.7721	Usmg5	6.75135	Galnt9	5.24927	Slc25a44	7.26931	Usmg5	6.88301
Kcnf1	Srsf5	Psmc1	Dgkb	Atxn7l1	Tgfb3			Stmn4	6.63577	Hdac2	6.19151	Stmn4	6.48012	Clpb	5.297	Cdc42se1	5.86118	Stmn4	6.30941
Asap2	Ttc9	Ttc7b	Etv1	Tspan13	Irf2bpl			Pcbp2	7.39158	Mrs2	4.79478	Pcbp2	7.29412	Usmg5	6.89546	Bms1	5.68834	Pcbp2	7.46073
Ywhaq	Map3k9	Rps6ka5	Arl4a	Dgkb	Zdhhc22			Gjb6	6.28338	Ankrd63	2.00845	Gjb6	6.43436	Stmn4	6.3717	Rrp7a	5.16047	Gjb6	6.27998
Mboat2	Sipa1l1	Cpsf2	Lrrn3	Etv1	Tmed8			Ide	7.37308	Cyhr1	6.26596	Ide	7.0916	Pcbp2	7.36351	Cc2d1a	3.03115	Ide	7.43896
Kidins220	Zfyve1	Lgmn	Nrcam	Ifrd1	Ahsa1			Srr	6.40416	Map3k2	6.18546	Srr	6.33669	Gjb6	6.44273	Camkk2	6.0635	Srr	6.49113
Id2	Rbm25	Golga5	Nova1	Lrrn3	Nrxn3			Smarca1	6.04706	Aars	5.99584	Smarca1	6.07115	Ide	6.91802	Taf2	5.23686	Smarca1	6.07951
Cmpk2	Psen1	Chga	Foxg1	Dnajb9	Dio2			Kcnab2	9.02402	Cadps	7.58922	Kcnab2	8.79759	Srr	6.43137	Ndufv3	5.47625	Kcnab2	8.95915
Sox11	Numb	Ubr7	Scfd1	Nrcam	Sel1l			Tmem14a	4.14331	Zfp827	4.98312	Tmem14a	4.19959	Smarca1	6.10301	Gnb4	4.38796	Tmem14a	4.07434
Tmem18	Entpd5	Ddx24	Strn3	Nova1	Flrt2			Rsbn1	5.71056	Hcfc1r1	4.57811	Rsbn1	5.61052	Kcnab2	8.76664	Specc1	7.69447	Rsbn1	5.74892
Cbll1	Npc2	Dicer1	Hectd1	Foxg1	Galc			Myef2	6.39239	Rap2a	6.02321	Myef2	6.49273	Tmem14a	4.13488	Ube2v1	1.22685	Myef2	6.74663
Gpr22	Arel1	D430019H16Rik	Arhgap5	Scfd1	Psmc1			Tcp1	6.74053	Gca	3.80796	Tcp1	6.63985	Rsbn1	5.68439	Mat2a	6.78491	Tcp1	6.73392
Prkar2b	Ylpm1	Bcl11b	Akap6	Strn3	Calm1			Ammecr1l	5.56678	Eif2s2	5.5704	Ammecr1l	5.34901	Myef2	6.64313	Bag4	6.50886	Ammecr1l	5.30565
Nampt	Nek9	Setd3	Sptssa	Hectd1	Ttc7b			Chd6	3.34791	Ube3a	7.54977	Chd6	3.34862	Tcp1	6.82341	Mapre3	6.15984	Chd6	3.47238
Atxn7l1	Tmed10	Ccdc85c	Eapp	Akap6	Rps6ka5			C1galt1	3.75144	Eef2k	4.8262	C1galt1	3.58686	Ammecr1l	5.39966	Ski	7.42843	C1galt1	3.61232
Ankmy2	Irf2bpl	Cyp46a1	Nfkbia	Npas3	Cpsf2			Dctn6	5.40185	Ppp1r11	4.5088	Dctn6	5.22683	Chd6	3.53584	Rptor	6.51845	Dctn6	5.33625
Dgkb	Zdhhc22	Eml1	Ralgapa1	Sptssa	Lgmn			Kcnn2	4.57196	Fnbp4	5.4712	Kcnn2	4.58708	C1galt1	3.56731	Mtmr7	5.2322	Kcnn2	4.84382
Arl4a	Ahsa1	Evl	Brms1l	Eapp	Golga5			Gpc5	6.46533	Zfp398	5.10768	Gpc5	6.3856	Dctn6	5.4955	Ndufa12	5.60792	Gpc5	6.61416
Pnpla8	Sptlc2	Yy1	Sstr1	Cfl2	Chga			Csnk1a1	8.06541	Grpel1	4.10127	Csnk1a1	8.01985	Kcnn2	4.89959	Ephx4	5.48411	Csnk1a1	8.13645
Nrcam	Nrxn3	Begain	Sec23a	Psma6	Itpk1			Plcl1	6.06198	Arl3	4.10127	Plcl1	6.04855	Gpc5	6.54772	Csnk2a2	4.99438	Plcl1	6.02211
Nova1	Dio2	Dlk1	Trappc6b	Ralgapa1	Ubr7			Gstp1	5.21561	Amph	6.6078	Gstp1	5.40939	Csnk1a1	8.18224	Ckmt1	5.77415	Gstp1	4.91313
Foxg1	Gtf2a1	Ppp2r5c	Pnn	Sstr1	Dicer1			Atxn7l1	5.56445	Tab3	4.7131	Atxn7l1	5.66602	Plcl1	6.24442	Grb2	6.62	Atxn7l1	5.59995
Prkd1	Sel1l	Dync1h1	Fbxo33	Trappc6b	Clmn			Cep120	6.02691	Rexo1	3.53122	Cep120	6.06366	Gstp1	5.0258	Tdrd3	5.75154	Cep120	5.94699
Scfd1	Flrt2	Traf3	Klhl28	Pnn	Glrx5			Ascc2	5.12057	Arpc3	5.24963	Ascc2	5.29882	Atxn7l1	5.7175	Crmp1	4.43736	Ascc2	5.19126
Strn3	Galc	Cdc42bpb	Mdga2	Fbxo33	Bcl11b			Calr	9.58031	Dcaf11	2.84422	Calr	9.73542	Cep120	6.01062	Snph	8.89811	Calr	9.87062
Hectd1	Zc3h14	Ckb	Rps29	Mdga2	Ccdc85c			Spns1	0.76466	Wdr48	5.41376	Spns1	1.28397	Ascc2	5.23954	Dusp22	3.59264	Spns1	0.574847
Arhgap5	Calm1	Bag5	Klhdc2	Rps29	Cyp46a1			Ube2q2	5.92171	Arhgap21	5.28399	Ube2q2	5.90914	Calr	9.70089	Psmd4	5.63992	Ube2q2	6.14244
Akap6	Lgmn	Klc1	Arf6	Klhdc2	Eml1			Rpn2	7.80247	Trrap	7.21395	Rpn2	7.88389	Spns1	1.40257	Myl12b	6.55434	Rpn2	7.71282
Npas3	Chga	Akt1	Sos2	Arf6	Yy1			Paxip1	5.64377	Cct2	5.93949	Paxip1	5.51758	Ube2q2	6.10301	Tfam	5.20394	Paxip1	5.56593
Sptssa	Itpk1	Btbd6	Atl1	Sos2	Begain			Nucb2	3.94998	Rpl32	7.03615	Nucb2	4.22668	Rpn2	7.81087	Ppp2r5b	5.42819	Nucb2	3.88493
Eapp	Ubr7	Pacs2	Trim9	Trim9	Dlk1			Ndrg2	10.3459	Lrrc4	7.40987	Ndrg2	10.2454	Paxip1	5.50366	Ube2g1	5.58253	Ndrg2	10.2626
Nfkbia	Ddx24	Crip2	Tmx1	Psma3	Dync1h1			Cmas	5.41225	Arl4c	5.11618	Cmas	5.2201	Nucb2	3.73378	Raver2	5.6364	Cmas	5.48326
Ralgapa1	Dicer1	Rapgef5	Psma3	Arid4a	Cdc42bpb			Agps	5.76226	Pde10a	6.04341	Agps	5.82298	Ndrg2	10.3623	Caly	7.86362	Agps	5.83239
Sstr1	Glrx5	Itgb8	Arid4a	Daam1	Bag5			Snx27	7.53877	Ing2	4.29338	Snx27	7.37356	Cmas	5.28127	Trpm7	3.26801	Snx27	7.58132
Trappc6b	Papola	Klf6	Daam1	Jkamp	Klc1			Ik	6.10907	Parn	4.59645	Ik	5.87956	Agps	5.83424	Sub1	7.40379	Ik	6.05928
Pnn	Bcl11b	Pitrm1	Rtn1	Rtn1	Tmem179			Chpf2	5.37819	Ptbp2	6.17736	Chpf2	5.40346	Snx27	7.43422	Rsl24d1	4.42924	Chpf2	5.28836
Fbxo33	Setd3	Pfkp	Ppm1a	Pcnx4	Cep170b			Add2	7.47575	Med19	4.5088	Add2	7.38413	Ik	6.11903	Rps12	6.38425	Add2	7.38551
Klhl28	Cyp46a1	Wdr37	Hif1a	Ppm1a	Btbd6			Adam23	8.22794	Mbd2	5.09913	Adam23	8.20838	Chpf2	5.33712	Rap1b	4.43736	Adam23	8.01822
Mdga2	Eml1	Larp4b	Dbpht2	Snapc1	Ptprn2			Hopx	6.07021	Zdhhc13	5.25349	Hopx	5.93196	Add2	7.34471	Prps2	5.45242	Hopx	6.25171
Rps29	Evl	Dip2c	Kcnh5	Kcnh5	Sp4			Capns1	6.15929	Cggbp1	6.74702	Capns1	6.06178	Adam23	7.99237	Rnf123	5.82452	Capns1	6.04288
Rpl36al	Yy1	Zmynd11	Ppp2r5e	Sgpp1	Itgb8			Klf3	4.30264	Mapkapk2	3.50557	Klf3	4.34888	Hopx	6.085	Nfx1	6.34811	Klf3	4.16805
Mgat2	Begain	Chrm3	Sgpp1	Akap5	Wdr37			Slc15a4	4.78289	Pnck	3.51845	Slc15a4	4.74067	Capns1	6.21159	Fbxo31	5.8027	Slc15a4	4.55675
Arf6	Dync1h1	Heatr1	Mthfd1	Hspa2	Dip2c			Cdk16	7.93137	Phtf2	5.4942	Cdk16	7.69973	Klf3	4.16262	Pja1	5.60072	Cdk16	7.68535
Atl1	Hsp90aa1	Gng4	Akap5	Sptb	Zmynd11			Kctd16	4.47117	Thoc3	3.94784	Kctd16	4.12952	Slc15a4	4.77929	Rai1	5.3994	Kctd16	4.44262
Map4k5	Cinp	Hecw1	Hspa2	Rab15	Chrm3			Fastk	5.4879	Pnpla7	1.89449	Fastk	5.1756	Cdk16	7.67418	Chid1	6.97949	Fastk	5.31251
Trim9	Cdc42bpb	Yae1d1	Sptb	Fut8	Ryr2			Pdlim5	5.89972	Ubac2	5.4811	Pdlim5	6.02172	Kctd16	4.454	Zdhhc6	3.86952	Pdlim5	5.91356
Daam1	Mark3	Vps41	Rab15	Gphn	Lyst			Rab3gap2	6.70504	Irs2	3.80796	Rab3gap2	6.67348	Fastk	5.4596	Rundc3b	4.74259	Rab3gap2	6.73392
Rtn1	Ckb	Amph	Max	Atp6v1d	Arid4b			Cep170b	8.38063	Vps13c	7.02265	Cep170b	8.18568	Pdlim5	6.02769	Sumf1	6.6896	Cep170b	8.09877
Pcnx4	Bag5	Stard3nl	Gphn	Vti1b	Hecw1			Rab7	7.43492	Trpc6	6.3422	Rab7	7.28126	Rab3gap2	6.73031	Rnf165	6.37793	Rab7	7.24294
Ppm1a	Klc1	BC005537	Mpp5	Zfp36l1	Gli3			Caprin1	7.98501	Selplg	4.77881	Caprin1	8.00525	Cep170b	8.09358	Ap2a1	6.47378	Caprin1	8.14655
Hif1a	Ppp1r13b	Nrsn1	Atp6v1d	Dcaf5	Rala			Adra2c	3.78382	Odf2	6.27168	Adra2c	3.82713	Rab7	7.35	Ube2v2	6.01281	Adra2c	3.86641
Snapc1	Tmem179	Sox4	Vti1b	Galnt16	Amph			Nkd1	3.48223	Map6d1	4.23994	Nkd1	3.44407	Caprin1	8.05293	Setd5	7.7113	Nkd1	3.14373
Dbpht2	Akt1	Uqcrfs1	Zfp36l1	Susd6	Epdr1			Kcnj11	3.80764	Tln2	7.0943	Kcnj11	3.68782	Adra2c	3.65783	Jun	5.16047	Kcnj11	3.37093
Kcnh5	Cep170b	Wrnip1	Actn1	Ttc9	Elmo1			Usp9x	8.35493	Efnb1	3.97613	Usp9x	8.3924	Nkd1	3.20326	Rdh14	5.77415	Usp9x	8.43197
Ppp2r5e	Btbd6	Tubb2a	Dcaf5	Map3k9	BC005537			Dpysl2	9.34272	Depdc5	5.28399	Dpysl2	9.38791	Kcnj11	3.6183	Spns2	6.22459	Dpysl2	9.35627
Akap5	Pacs2	Tubb2b	Srsf5	Sipa1l1	Acot13			Ncoa3	6.28903	Chn2	4.2477	Ncoa3	6.08418	Usp9x	8.40075	Hdac2	6.64299	Ncoa3	6.27822
Hspa2	Crip2	Slc22a23	Synj2bp	Zfyve1	Nrsn1			Tnk2	7.74966	Dhx36	5.98428	Tnk2	7.67596	Dpysl2	9.3622	Mrs2	5.24613	Tnk2	7.55481
Rab15	Ptprn2	Prpf4b	Ttc9	Psen1	Sox4			Zzef1	7.13892	Fkbp9	6.80204	Zzef1	7.03811	Ncoa3	6.26696	Ankrd63	2.45961	Zzef1	7.1213
Max	Sp4	Cdyl	Map3k9	Ptgr2	Wrnip1			Vgf	8.13804	Lrrtm4	8.37643	Vgf	7.98009	Tnk2	7.60066	Cyhr1	6.71653	Vgf	7.88139
Gphn	Itgb8	Fars2	Pcnx	Syndig1l	Tubb2a			Dvl3	5.26232	Fis1	4.93589	Dvl3	5.33351	Zzef1	7.08137	Map3k2	6.63595	Dvl3	5.32951
Mpp5	Gdi2	Ssr1	Sipa1l1	Npc2	Tubb2b			Nfx1	6.249	Arl15	5.01073	Nfx1	6.33358	Vgf	7.81961	Aars	6.44589	Nfx1	6.35163
Atp6v1d	Pfkp	Txndc5	Zfyve1	Arel1	Slc22a23			Tom1l2	7.96749	Dbn1	6.51765	Tom1l2	7.85325	Dvl3	5.25251	Cadps	8.03853	Tom1l2	7.86399
Vti1b	Larp4b	Smim13	Psen1	Ylpm1	Prpf4b			Zc3h12c	4.91301	Ppp2r5d	5.12463	Zc3h12c	4.7686	Nfx1	6.40402	Zfp827	5.43226	Zc3h12c	4.96627
Rdh11	Dip2c	Nedd9	Numb	Dlst	Nrn1			Ppm1f	5.92171	Prmt8	4.94546	Ppm1f	5.9299	Tom1l2	7.92309	Hcfc1r1	5.02701	Ppm1f	6.02002
Zfp36l1	Zmynd11	Hivep1	Entpd5	Nek9	Ssr1			Nfia	8.09796	Herc1	8.39576	Nfia	8.05948	Zc3h12c	4.89959	Rap2a	6.4718	Nfia	8.19467
Actn1	Chrm3	Phactr1	Syndig1l	Tmed10	Txndc5			Hivep2	9.51158	Pds5a	6.07209	Hivep2	9.19773	Ppm1f	6.12786	Gca	4.25652	Hivep2	9.32249
Dcaf5	Ryr2	Gfod1	Ylpm1	Irf2bpl	Gcnt2			Trip12	8.24766	Actn1	4.80007	Trip12	8.30013	Nfia	8.20909	Eif2s2	6.01823	Trip12	8.3199
Exd2	Lyst	Dtnbp1	Dlst	Zdhhc22	Elovl2			Rpl30	7.24157	Fem1a	4.7131	Rpl30	7.11536	Hivep2	9.12213	Ube3a	7.99726	Rpl30	7.35345
Galnt16	Gng4	Cap2	Mlh3	Ahsa1	Hivep1			P4ha1	6.95832	Eif3d	4.23994	P4ha1	6.93406	Trip12	8.35527	Eef2k	5.27359	P4ha1	6.97663
Slc39a9	Arid4b	Fam8a1	Nek9	Sptlc2	Phactr1			Slc44a1	7.19943	Ankrd6	5.04674	Slc44a1	7.28609	Rpl30	7.07134	Ppp1r11	4.95535	Slc44a1	7.11151
Susd6	Hecw1	Nup153	Tmed10	Nrxn3	Gfod1			Zfp423	5.53859	Arhgef11	6.24286	Zfp423	5.12608	P4ha1	6.94922	Fnbp4	5.91739	Zfp423	5.03836
Ttc9	Gli3	Kif13a	Fos	Dio2	Dtnbp1			Cnih4	5.73974	Mvb12b	6.44529	Cnih4	5.78474	Slc44a1	7.07408	Zfp398	5.55296	Cnih4	5.7027
Map3k9	Rala	Dek	Tgfb3	Gtf2a1	Atxn1			Arel1	7.47451	Wasf2	4.83653	Arel1	7.41612	Zfp423	5.19321	Grpel1	4.54643	Arel1	7.31299
Pcnx	Amph	Phf2	Irf2bpl	Ston2	Fam8a1			Gfpt1	6.45908	Ccdc91	4.39467	Gfpt1	6.51901	Cnih4	5.70104	Arl3	4.54643	Gfpt1	6.63072
Sipa1l1	Stard3nl	Wnk2	Zdhhc22	Sel1l	Nup153			Mcoln1	5.67863	Pacs1	4.80007	Mcoln1	5.75713	Arel1	7.29856	Amph	7.05264	Mcoln1	5.5544
Zfyve1	Epdr1	Bicd2	Tmed8	Flrt2	Dek			Magi2	0.310856	Rogdi	5.00617	Magi2	-0.722522	Gfpt1	6.52118	Tab3	5.15556	Magi2	0.900234
Psen1	Elmo1	Nol8	Ahsa1	Galc	Phf2			Herpud1	5.33787	Per3	5.43769	Herpud1	5.48147	Mcoln1	5.70576	Rexo1	3.97364	Herpud1	5.36622
Numb	Zfp322a	Spin1	Nrxn3	Zc3h14	Wnk2			Gabarapl2	1.72413	Prr7	1.68194	Gabarapl2	1.43102	Magi2	-0.229718	Arpc3	5.69173	Gabarapl2	1.22492
Dnal1	BC005537	Shc3	Dio2	Calm1	Bicd2			Trpc4ap	7.06674	Vezt	7.17177	Trpc4ap	7.03332	Herpud1	5.28127	Dcaf11	3.28609	Trpc4ap	7.05027
Entpd5	Aldh5a1	Sema4d	Gtf2a1	Ttc7b	Spin1			Pdk1	5.66566	Dnaja3	4.71869	Pdk1	5.8096	Gabarapl2	1.9078	Wdr48	5.85514	Pdk1	5.56879
Lin52	Nrsn1	Diras2	Ston2	Rps6ka5	Shc3			Zkscan1	6.56534	Ap3d1	6.40598	Zkscan1	6.50524	Trpc4ap	7.052	Arhgap21	5.72526	Zkscan1	6.57763
Ylpm1	Sox4	Sfxn1	Sel1l	Cpsf2	Diras2			Ipo5	7.05932	Reep6	3.56886	Ipo5	7.0362	Pdk1	5.66269	Trrap	7.65412	Ipo5	7.05232
Mlh3	Wrnip1	Thoc3	Flrt2	Chga	Auh			Syt5	6.79218	Tollip	6.03222	Syt5	6.69183	Zkscan1	6.64682	Cct2	6.37793	Syt5	6.59038
Nek9	Tubb2a	4833439L19Rik	Zc3h14	Ubr7	Sptlc1			Edem3	6.98728	Adrbk1	6.78082	Edem3	6.9895	Ipo5	7.07773	Rpl32	7.47352	Edem3	6.92835
Tmed10	Tubb2b	Higd2a	Calm1	Ddx24	Sfxn1			Usp3	4.79486	Myo1e	3.77613	Usp3	4.7265	Syt5	6.69274	Lrrc4	7.84696	Usp3	4.68381
Fos	Prpf4b	Cltb	Ttc7b	Dicer1	Cplx2			Shoc2	6.05703	Ppm1h	6.38151	Shoc2	6.22522	Edem3	6.92917	Arl4c	5.55296	Shoc2	6.19348
Tgfb3	Cdyl	Faf2	Rps6ka5	D430019H16Rik	Thoc3			Hectd1	7.74607	Emp2	5.94665	Hectd1	7.71117	Usp3	4.85777	Pde10a	6.47968	Hectd1	7.76374
Irf2bpl	Nrn1	Rnf44	Trip11	Papola	4833439L19Rik			Sun2	5.48051	Trim23	5.49746	Sun2	5.45593	Shoc2	6.01823	Ing2	4.72942	Sun2	5.3826
Zdhhc22	Ssr1	Gprin1	Cpsf2	Bcl11b	Cltb			Ep300	7.42597	Atg4b	4.31569	Ep300	7.38413	Hectd1	7.81142	Parn	5.03238	Ep300	7.36091
Tmed8	Txndc5	Sncb	Golga5	Setd3	Rnf44			Clns1a	5.20369	Kdm4a	4.88706	Clns1a	5.36739	Sun2	5.52786	Ptbp2	6.61285	Clns1a	5.27789
Ahsa1	Gcnt2	Prelid1	Chga	Ccdc85c	Gprin1			Tmem50a	6.03197	Lrrc41	4.61456	Tmem50a	5.92163	Ep300	7.4568	Med19	4.944	Tmem50a	6.09352
Nrxn3	Elovl2	Rgs14	Ubr7	Cyp46a1	Sncb			Slc16a14	3.59601	Mrpl3	4.76266	Slc16a14	3.59728	Clns1a	5.297	Mbd2	5.53416	Slc16a14	3.79966
Dio2	Smim13	Prr7	Btbd7	Eml1	Unc5a			Nacc1	4.73815	Ick	4.81058	Nacc1	4.60268	Tmem50a	5.90781	Zdhhc13	5.68834	Nacc1	4.85795
Gtf2a1	Tmem170b	Ddx46	Ddx24	Evl	Nsd1			Tpr	7.33056	Becn1	5.7721	Tpr	7.26337	Slc16a14	3.49277	Cggbp1	7.18144	Tpr	7.51003
Ston2	Hivep1	Txndc15	Dicer1	Yy1	Prelid1			Spats2	4.67482	Ralgds	5.37533	Spats2	4.5923	Nacc1	4.71984	Mapkapk2	3.93976	Spats2	4.55675
Sel1l	Phactr1	Spock1	Clmn	Begain	Lman2			Slmo2	5.00172	Aebp2	5.34672	Slmo2	4.89645	Tpr	7.33712	Pnck	3.95114	Slmo2	4.93994
Flrt2	Dtnbp1	Hnrnpa0	Glrx5	Ppp2r5c	Tmed9			Nr1d2	6.36724	Gas2l1	4.2085	Nr1d2	6.58985	Spats2	4.59303	Phtf2	5.92607	Nr1d2	6.68192
Zc3h14	Fam8a1	Ubqln1	D430019H16Rik	Dync1h1	Ddx46			Nkain1	2.05118	Sympk	5.69761	Nkain1	1.83485	Slmo2	5.19321	Thoc3	4.37956	Nkain1	1.5374
Foxn3	Nup153	Hnrnpk	Papola	Hsp90aa1	Txndc15			Morc3	4.75866	Arid4a	5.7721	Morc3	5.06733	Nr1d2	6.5892	Pnpla7	2.32611	Morc3	4.96192
Psmc1	Dek	Agtpbp1	Bcl11b	Traf3	Spock1			Sccpdh	5.08528	Ei24	7.06607	Sccpdh	5.30201	Nkain1	1.94022	Ubac2	5.91157	Sccpdh	5.34297
Calm1	Phf2	Naa35	Setd3	Cdc42bpb	Hnrnpa0			Numa1	6.55717	Foxj3	6.09376	Numa1	6.58069	Morc3	5.085	Irs2	4.23806	Numa1	6.56476
Ttc7b	Wnk2	Ptch1	Cyp46a1	Eif5	Ubqln1			Rasa1	6.51439	Yipf5	6.82036	Rasa1	6.44161	Sccpdh	5.19657	Vps13c	7.45265	Rasa1	6.55033
Rps6ka5	Shc3	Habp4	Evl	Ckb	Hnrnpk			Ctbp1	7.01653	Mcph1	4.4893	Ctbp1	6.91336	Numa1	6.64805	Trpc6	6.77213	Ctbp1	6.85628
Trip11	Sema4d	Ctsl	Yy1	Klc1	Agtpbp1			Slc4a1ap	4.8224	Eea1	6.69407	Slc4a1ap	4.91739	Rasa1	6.5828	Selplg	5.20869	Slc4a1ap	5.13435
Cpsf2	Diras2	Ube2ql1	Wars	Tmem179	Ptch1			Dcaf7	7.65163	Slc38a9	6.77546	Dcaf7	7.68087	Ctbp1	6.99623	Odf2	6.70144	Dcaf7	7.6533
Lgmn	Auh	Lpcat1	Begain	Cep170b	Zfp367			Zbtb45	3.59601	Adra2a	4.10127	Zbtb45	3.25958	Slc4a1ap	4.84925	Map6d1	4.66867	Zbtb45	3.47238
Golga5	Sptlc1	Brd9	Dlk1	Btbd6	Habp4			Zmym2	5.52668	Ccdc149	4.82101	Zmym2	5.7266	Dcaf7	7.65417	Tln2	7.52298	Zmym2	5.62496
Chga	Cplx2	Tppp	Dync1h1	Ptprn2	Adcy2			Arhgap12	6.97944	Dicer1	6.01187	Arhgap12	6.78934	Zbtb45	3.29386	Efnb1	4.40461	Arhgap12	7.05947
Ubr7	Thoc3	Sdha	Traf3	Rapgef5	Nsun2			Lars	5.39663	Clasp1	6.65377	Lars	5.31785	Zmym2	5.66754	Depdc5	5.71195	Lars	5.3891
Ddx24	4833439L19Rik	Nr2f1	Cdc42bpb	Sp4	Ube2ql1			Cbln2	3.63203	Ube2r2	6.3203	Cbln2	3.80931	Arhgap12	6.87883	Chn2	4.67555	Cbln2	3.6561
Dicer1	Higd2a	Mblac2	Mark3	Itgb8	Brd9			Tmtc3	5.46562	Bcl2	5.51042	Tmtc3	5.52851	Lars	5.42565	Dhx36	6.41128	Tmtc3	5.5802
Clmn	Cltb	Ccnh	Ckb	Gdi2	Tppp			Cdk14	8.3803	Wdr35	5.10341	Cdk14	8.27844	Cbln2	3.30635	Fkbp9	7.22897	Cdk14	8.37784
Glrx5	Rnf44	Rasa1	Bag5	Klf6	Exoc3			Rpe	4.92758	Vps39	1.81319	Rpe	5.00999	Tmtc3	5.41992	Lrrtm4	8.80238	Rpe	5.36622
D430019H16Rik	Gprin1	Vcan	Klc1	Pitrm1	Sdha			Txn1	4.98789	Dnajb5	5.83524	Txn1	4.70739	Cdk14	8.32297	Fis1	5.36152	Txn1	4.69959
Bcl11b	Sncb	Rps23	Tmem179	Wdr37	Ccdc127			Gsk3b	8.38394	Eif3e	6.19753	Gsk3b	8.38302	Rpe	5.21987	Arl15	5.43631	Gsk3b	8.35353
Setd3	Unc5a	Ankrd34b	Akt1	Dip2c	Rhobtb3			Morf4l2	6.84492	Shank2	8.0603	Morf4l2	6.98454	Txn1	4.87044	Dbn1	6.9429	Morf4l2	6.90132
Ccdc85c	Nsd1	Serinc5	Cep170b	Zmynd11	Nr2f1			Sv2b	9.65851	Cdc34	2.69335	Sv2b	9.66287	Gsk3b	8.44802	Ppp2r5d	5.54922	Sv2b	9.50491
Cyp46a1	Prelid1	Homer1	Btbd6	Chrm3	Mblac2			Apc2	7.4189	Ints4	3.50557	Apc2	7.29011	Morf4l2	6.84069	Prmt8	5.37002	Apc2	7.05436
Eml1	Lman2	Jmy	Brf1	Ryr2	Cetn3			Nlgn3	6.88372	Fgf11	4.18445	Nlgn3	6.93714	Sv2b	9.57185	Herc1	8.81956	Nlgn3	6.6872
Evl	Prr7	Lhfpl2	Mta1	Lyst	Rasa1			Tyro3	7.0477	Mllt1	5.44782	Tyro3	7.01011	Apc2	7.25895	Pds5a	6.49532	Tyro3	6.8122
Yy1	Dbn1	Scamp1	Crip2	Gng4	Vcan			Poldip3	5.93978	Tmbim1	5.44782	Poldip3	5.98846	Nlgn3	6.79821	Actn1	5.22284	Poldip3	6.02002
Begain	Ddx46	Ap3b1	Ptprn2	Ggps1	Rasgrf2			B4galt3	5.42513	Mmp16	7.84582	B4galt3	5.44155	Tyro3	6.87254	Fem1a	5.13575	B4galt3	5.18754
Dync1h1	Txndc15	Pde8b	Sp4	Arid4b	Homer1			Sez6l2	9.43481	Golga1	5.28021	Sez6l2	9.42531	Poldip3	6.06309	Eif3d	4.66176	Sez6l2	9.27281
Cinp	Cxcl14	Aggf1	Itgb8	Hecw1	Jmy			Satb2	4.52484	Gbas	5.31754	Satb2	4.87947	B4galt3	5.24927	Ankrd6	5.46835	Satb2	4.63541
Traf3	Smad5	Hmgcr	Klf6	Psma2	Arsb			Plrg1	4.57659	Fndc3a	5.7477	Plrg1	4.58708	Sez6l2	9.36313	Arhgef11	6.66389	Plrg1	4.55675
Cdc42bpb	Spock1	Enc1	Pitrm1	Stard3nl	Lhfpl2			Rab10	7.79207	Ndufb11	4.48275	Rab10	7.65367	Satb2	4.80593	Mvb12b	6.86531	Rab10	7.81896
Mark3	Hnrnpa0	Utp15	Wdr37	Epdr1	Scamp1			Cntnap1	8.69239	Eya3	4.96441	Cntnap1	8.62724	Plrg1	4.62828	Wasf2	5.25534	Cntnap1	8.52198
Ckb	Ubqln1	Btf3	Gtpbp4	Zfp322a	Ap3b1			Hapln1	6.02691	Magi3	5.87835	Hapln1	5.95442	Rab10	7.77593	Ccdc91	4.81289	Hapln1	6.13472
Bag5	Hnrnpk	Map1b	Larp4b	BC005537	Pde8b			Snx25	5.79241	Gzf1	5.18243	Snx25	5.8667	Cntnap1	8.54772	Pacs1	5.21814	Snx25	5.83478
Klc1	Ntrk2	Bdp1	Dip2c	Acot13	Aggf1			Taf9b	5.02561	Pik3ca	6.56653	Taf9b	4.8623	Hapln1	5.94423	Rogdi	5.42411	Taf9b	4.95755
Ppp1r13b	Agtpbp1	Slc30a5	Zmynd11	Nrsn1	Poc5			Acat2	4.14953	Btbd3	8.36132	Acat2	4.00201	Snx25	5.82992	Per3	5.85514	Acat2	4.39173
Akt1	Isca1	Pik3r1	Chrm3	Sox4	Enc1			Lrp12	6.5035	Birc2	4.67908	Lrp12	6.74668	Taf9b	4.78822	Prr7	2.09938	Lrp12	6.50167
Cep170b	Ptch1	Srek1	Ryr2	Uqcrfs1	Utp15			Ttr	12.0401	Nrarp	3.42577	Ttr	12.3283	Acat2	4.07773	Vezt	7.58913	Ttr	11.987
Btbd6	Adcy2	Sgtb	Actn2	Wrnip1	Btf3			Psmd4	5.51467	Hagh	4.3083	Psmd4	5.66355	Lrp12	6.3717	Dnaja3	5.13575	Psmd4	5.59152
Pacs2	Nsun2	Rnf180	Heatr1	Tubb2a	Map1b			Vamp3	5.01882	Rbm6	6.56032	Vamp3	5.35209	Ttr	12.2206	Ap3d1	6.82258	Vamp3	5.23161
Crip2	Ube2ql1	Htr1a	Gng4	Tubb2b	Bdp1			Prkd1	4.68771	Lzts1	4.91656	Prkd1	4.52294	Psmd4	5.58537	Reep6	3.98476	Prkd1	4.73575
Ptprn2	Tppp	Kif2a	Ggps1	Slc22a23	Pik3r1			Plekhm2	6.97331	Qser1	6.49339	Plekhm2	6.82524	Vamp3	5.24927	Tollip	6.4479	Plekhm2	6.72367
Sp4	Exoc3	Plk2	Arid4b	Prpf4b	Srek1			Rnf170	5.00858	Ino80	5.265	Rnf170	5.19287	Prkd1	4.74758	Adrbk1	7.19586	Rnf170	4.93106
Itgb8	Pdcd6	Il6st	Hecw1	Cdyl	Nln			Tbc1d23	5.02222	Ap3s1	5.63689	Tbc1d23	5.05226	Plekhm2	6.77929	Myo1e	4.19083	Tbc1d23	5.14207
Pitrm1	Sdha	Snx18	Yae1d1	Nrn1	Sgtb			Prkar2b	4.78289	Dctn6	4.8771	Prkar2b	4.97446	Rnf170	5.30324	Ppm1h	6.796	Prkar2b	4.61891
Wdr37	Rhobtb3	Mocs2	Vps41	Ssr1	Trim23			Rnf34	5.5967	Dmd	8.06908	Rnf34	5.57933	Tbc1d23	4.91598	Emp2	6.36097	Rnf34	5.78141
Gtpbp4	Nr2f1	Emb	Amph	Txndc5	Rgs7bp			Camk2n1	9.52691	Ahsa1	5.86328	Camk2n1	9.49801	Prkar2b	4.80593	Trim23	5.91157	Camk2n1	9.41638
Larp4b	Mef2c	Hcn1	Stard3nl	Gcnt2	Rnf180			Plekhg5	0.698262	Rnf169	5.61606	Cygb	4.67332	Rnf34	5.83424	Atg4b	4.72942	Plekhg5	0.900234
Dip2c	Rasa1	Nnt	Epdr1	Elovl2	Htr1a			Cygb	4.80278	Phf14	6.16308	Zbtb41	6.28606	Camk2n1	9.50671	Kdm4a	5.30053	Cygb	4.86263
Zmynd11	Hapln1	Paip1	Elmo1	Smim13	Kif2a			Zbtb41	6.32523	Siah1a	4.19251	Inpp4a	7.4596	Plekhg5	0.907797	Lrrc41	5.02701	Zbtb41	6.40232
Chrm3	Vcan	Fam107a	Zfp322a	Nedd9	Il6st			Inpp4a	7.56637	Lpin2	6.30551	Psmd14	5.68079	Cygb	4.97976	Mrpl3	5.17511	Inpp4a	7.51895
Ryr2	Msh3	Ptprg	BC005537	Tmem170b	Paip1			Psmd14	5.61031	Mprip	8.44929	Rassf2	6.96557	Zbtb41	6.44978	Ick	5.22284	Psmd14	5.71827
Lyst	Homer1	Fezf2	Nrsn1	Hivep1	Hmgcs1			Rassf2	7.01908	Siae	5.8982	Tmod2	9.91327	Inpp4a	7.47213	Becn1	6.18416	Rassf2	7.08372
Gng4	Jmy	Cadps	Sox4	Phactr1	Abhd6			Tmod2	9.94522	Cap2	6.56963	Map4k2	3.80931	Psmd14	5.81688	Ralgds	5.78691	Tmod2	9.96476
Ggps1	Arsb	Synpr	E2f3	Gfod1	Pdhb			Map4k2	3.81549	Rap1a	5.50719	Timp2	8.53709	Rassf2	7.10391	Aebp2	5.75803	Map4k2	4.07434
Arid4b	Lhfpl2	Psmd6	Uqcrfs1	Dtnbp1	Fam107a			Timp2	8.44753	Kalrn	9.2565	Ndfip1	7.89924	Tmod2	10.027	Gas2l1	4.61959	Timp2	8.3002
Hecw1	Tbca	Slc4a7	Dusp22	Atxn1	Ptprg			Ndfip1	7.89153	Zmynd8	5.76131	Mcph1	4.52294	Map4k2	4.00296	Sympk	6.1074	Ndfip1	7.86399
Gli3	Aggf1	Top2b	Wrnip1	Cap2	Fezf2			Mcph1	4.62207	Skiv2l2	4.81581	Gstm1	8.23323	Timp2	8.40293	Arid4a	6.18175	Mcph1	4.47354
Amph	Hexb	Thrb	Tubb2a	Fam8a1	Cadps			Gstm1	8.31844	Snx12	4.92626	Sumo1	6.01979	Ndfip1	7.74644	Ei24	7.47549	Gstm1	8.35975
Epdr1	Enc1	Nr1d2	Tubb2b	Nup153	Synpr			Sumo1	5.95408	Ppp2r5e	5.50719	Rspry1	5.11525	Mcph1	4.43137	Foxj3	6.50307	Sumo1	6.10935
Elmo1	Utp15	Ube2e2	Slc22a23	Dek	Atxn7			Rspry1	4.96689	Cpne4	5.81189	Slc4a8	7.61702	Gstm1	8.40584	Yipf5	7.22897	Rspry1	5.31592
Zfp322a	Tnpo1	Gng2	Prpf4b	Phf2	Psmd6			Slc4a8	7.55996	Senp5	5.03783	Suv39h1	4.2132	Sumo1	5.97585	Mcph1	4.89769	Slc4a8	7.60525
BC005537	Map1b	Anxa7	Eci2	Wnk2	Top2b			Suv39h1	4.3735	Sumo3	5.9773	Rpl7	7.61189	Rspry1	5.21987	Eea1	7.10198	Suv39h1	4.17559
Acot13	Bdp1	Ppp3cb	Cdyl	Bicd2	Nr1d2			Rpl7	7.64779	Clip2	5.52644	C77080	3.93786	Slc4a8	7.42709	Slc38a9	7.18265	Rpl7	7.76311
Nrsn1	Pik3r1	Usp54	Ssr1	Spin1	Nkiras1			C77080	4.00595	Atp5g3	5.26882	Cdk5r1	7.26583	Suv39h1	4.14186	Adra2a	4.50842	C77080	3.40981
Sox4	Srek1	Camk2g	Txndc5	Shc3	Ube2e2			Cdk5r1	7.42148	Tshz2	7.52046	Atp5g3	6.2168	Rpl7	7.69274	Ccdc149	5.22753	Cdk5r1	7.25722
Wrnip1	Sgtb	Ap3m1	Gcnt2	Sema4d	Ppp3cb			Atp5g3	6.36323	Plekhb2	7.13356	Slc32a1	6.31791	C77080	3.73378	Dicer1	6.41745	Atp5g3	6.33993
Tubb2a	Rgs7bp	Samd8	Tmem14c	Diras2	Usp54			Slc32a1	6.49985	Tbca	4.9738	Dtx4	6.25184	Cdk5r1	7.25008	Clasp1	7.05923	Slc32a1	5.94036
Tubb2b	Htr1a	Kcnma1	Elovl2	Sptlc1	Camk2g			Dtx4	6.11862	Lbh	5.36823	Slc12a6	6.42562	Atp5g3	6.32796	Ube2r2	6.72484	Dtx4	6.10738
Slc22a23	Kif2a	Dlg5	Smim13	Drd1	Samd8			Slc12a6	6.36724	Htt	7.44993	Dusp3	7.60738	Slc32a1	6.27333	Bcl2	5.91448	Slc12a6	6.52989
Prpf4b	Rab3c	Polr3a	Hivep1	Cplx2	Kcnma1			Dusp3	7.75784	Pfkp	6.63762	Slc38a2	7.93305	Dtx4	6.43848	Wdr35	5.50743	Dusp3	7.64314
Cdyl	Mier3	Zmiz1	Phactr1	Thoc3	Dlg5			Slc38a2	7.68738	Rundc1	3.80796	Spr	3.2464	Slc12a6	6.39528	Vps39	2.21719	Slc38a2	7.70437
Fars2	Il6st	Slmap	Gfod1	4833439L19Rik	Polr3a			Spr	3.40106	Thtpa	2.04451	Hnrnpr	6.68452	Dusp3	7.72566	Dnajb5	6.23859	Spr	2.73794
Ssr1	Snx18	Arhgef3	Dtnbp1	Higd2a	Slmap			Hnrnpr	6.71347	Ifrd1	5.22627	Arid2	6.35061	Slc38a2	7.74701	Eif3e	6.60025	Hnrnpr	6.78165
Txndc5	Hcn1	Wnt5a	Atxn1	Cltb	Arf4			Arid2	6.18073	Ift80	4.89696	Tgfb3	4.36116	Spr	3.56731	Shank2	8.4625	Arid2	6.24456
Gcnt2	Hmgcs1	Cacna2d3	Cap2	Rnf44	Erc2			Tgfb3	4.18633	Trim24	5.4712	Adnp2	4.90486	Hnrnpr	6.76918	Cdc34	3.09411	Tgfb3	4.33898
Smim13	Pxk	Cacna1d	Fam8a1	Gprin1	Wnt5a			Adnp2	4.99827	Cdh12	7.43217	Nudcd3	6.82635	Arid2	6.29387	Ints4	3.90507	Adnp2	5.01332
Nedd9	Pdhb	Sfmbt1	Nup153	Sncb	Cacna2d3			Nudcd3	6.83723	Fam78b	4.60252	Zfp207	5.26	Tgfb3	4.38501	Fgf11	4.58347	Nudcd3	6.68852
Tmem170b	Fam107a	Nek4	Dek	Nsd1	Cacna1d			Zfp207	5.07223	Ndufs4	5.44445	Shc2	4.9864	Adnp2	5.14186	Mllt1	5.84602	Zfp207	5.22799
Hivep1	Ptprg	Pbrm1	Phf2	Prelid1	Tkt			Shc2	5.1457	Armcx4	7.5854	Sae1	5.36434	Nudcd3	6.81142	Tmbim1	5.84602	Shc2	5.11487
Gfod1	Fezf2	Nisch	Wnk2	Lman2	Bap1			Sae1	5.35682	G6pdx	4.23994	Insig1	6.32733	Zfp207	5.24927	Mmp16	8.24394	Sae1	5.34297
Dtnbp1	Cadps	Bap1	Bicd2	Prr7	Sh3bp5			Insig1	6.5035	Sod2	7.06057	Tmem214	5.771	Shc2	4.82341	Golga1	5.6781	Insig1	6.36818
Atxn1	Synpr	Sh3bp5	Spin1	Tmed9	Ncoa4			Tmem214	5.60579	Luc7l2	7.45831	Kcnj6	7.04383	Sae1	5.47351	Gbas	5.71529	Tmem214	5.59995
Cap2	Atxn7	Glud1	Diras2	Ddx46	Ogdhl			Kcnj6	7.12081	Grik1	5.73396	Clvs2	5.85806	Insig1	6.37911	Fndc3a	6.14505	Kcnj6	7.08972
Fam8a1	Psmd6	Bmpr1a	Auh	B230219D22Rik	Glud1			Clvs2	5.99269	Zfp275	4.69619	Snrk	6.40204	Tmem214	5.52519	Ndufb11	4.87993	Clvs2	6.10935
Nup153	Top2b	Grid1	Sptlc1	Txndc15	Grid1			Snrk	6.38976	Dennd5a	8.71956	Sec23b	5.08224	Kcnj6	6.91088	Eya3	5.36152	Snrk	6.39265
Phf2	Ube2e2	Ccser2	Sfxn1	Cxcl14	Nrg3			Sec23b	5.25657	Mbd1	3.61756	Echs1	4.72175	Clvs2	6.06124	Magi3	6.27527	Sec23b	5.22072
Wnk2	Gng2	Nrg3	Cplx2	Spock1	Txndc16			Echs1	5.11422	Psmb7	5.2341	Xrcc5	4.15796	Snrk	6.46658	Gzf1	5.57887	Echs1	5.00911
Bicd2	Ppp3cb	Cnih1	4833439L19Rik	Hnrnpa0	Fermt2			Xrcc5	4.15573	Ctxn1	6.38854	Ctcf	6.25349	Sec23b	5.21656	Pik3ca	6.96272	Xrcc5	4.17559
Spin1	Camk2g	Samd4	Cltb	Ubqln1	Cnih1			Ctcf	6.13283	Mtf1	5.24189	Nhp2l1	5.91748	Echs1	5.0258	Btbd3	8.75731	Ctcf	6.39103
Shc3	Ap3m1	Mapk1ip1l	Faf2	Hnrnpk	Samd4			Nhp2l1	5.99615	Fem1c	4.72981	Lsm11	4.12952	Xrcc5	4.22973	Birc2	5.07462	Nhp2l1	6.05724
Diras2	Dlg5	Ktn1	Rnf44	Ntrk2	Ktn1			Lsm11	4.54387	Tsc22d1	7.36244	Efnb1	3.97829	Ctcf	6.20493	Nrarp	3.82071	Lsm11	4.50381
Sptlc1	Polr3a	Ttc5	Gprin1	Agtpbp1	Sall2			Efnb1	3.84648	Lgalsl	5.80402	Nrip3	7.34293	Nhp2l1	6.14186	Hagh	4.70274	Efnb1	3.77008
Drd1	Slmap	Apex1	Sncb	Isca1	Oxa1l			Nrip3	7.38632	Tmem8b	4.46289	Hmgn2	5.55548	Lsm11	4.30012	Rbm6	6.95426	Nrip3	7.446
Cplx2	Erc2	Tox4	Unc5a	Ptch1	Lrp10			Hmgn2	5.66566	Ppm1a	6.16308	Tmem222	5.40049	Efnb1	3.67719	Lzts1	5.30941	Hmgn2	5.57165
Thoc3	Wnt5a	Sall2	Nsd1	Habp4	Acin1			Tmem222	5.50256	Smarcad1	5.44107	Pygo2	4.80502	Nrip3	7.365	Qser1	6.88622	Tmem222	5.22799
4833439L19Rik	Cacna2d3	Oxa1l	Lman2	Ctsl	Slc7a8			Pygo2	4.85705	Pgs1	4.3083	Zfp629	4.92568	Hmgn2	5.26536	Ino80	5.6574	Pygo2	5.10701
Cltb	Actr8	Mmp14	Rgs14	Zfp458	Bcl2l2			Zfp629	4.87594	Ikbkb	5.6719	Rorb	7.15557	Tmem222	5.40838	Ap3s1	6.02901	Zfp629	4.97926
Rnf44	Tkt	Prmt5	Grk6	Adcy2	Slc22a17			Rorb	7.16681	Shprh	6.4232	Ralyl	2.62767	Pygo2	4.93621	Dctn6	5.26905	Rorb	7.3266
Gprin1	Nisch	Acin1	Prr7	Ube2ql1	Zfhx2			Ralyl	2.66917	Dgke	5.95852	Trio	8.41981	Ahi1	0.448362	Dmd	8.46101	Ralyl	2.92852
Sncb	Bap1	Bcl2l2	Dbn1	Lpcat1	Thtpa			Trio	8.42718	Elof1	3.22037	Calcoco1	5.48428	Zfp629	4.90781	Ahsa1	6.25475	Trio	8.3868
Unc5a	Capn7	Slc22a17	Tmed9	Clptm1l	Jph4			Calcoco1	5.42513	Atl2	6.50961	Synj2	6.63227	Rorb	7.21904	Rnf169	6.00737	Calcoco1	5.48326
Nsd1	Sh3bp5	Cmtm5	Ddx46	Brd9	Ipo4			Synj2	6.48146	Mt1	6.04341	Crim1	8.07448	Ralyl	2.73378	Phf14	6.55434	Synj2	6.53722
Rgs14	Dph3	Jph4	B230219D22Rik	Tppp	Tm9sf1			Crim1	8.06952	Nf2	5.58272	Pcgf5	3.3609	Trio	8.34773	Siah1a	4.58347	Crim1	8.02763
Prr7	Ogdhl	Cpne6	Txndc15	Pdcd6	Nedd8			Pcgf5	3.42178	Ehmt1	5.38942	Atp8a1	9.39893	Calcoco1	5.55951	Lpin2	6.69638	Pcgf5	3.52055
Tmed9	Mapk8	Tm9sf1	Smad5	Rhobtb3	Mphosph8			Atp8a1	9.4249	Usp19	5.43089	Trim37	8.31006	Synj2	6.52118	Mprip	8.83999	Atp8a1	9.33685
Ddx46	Glud1	Nedd8	Spock1	Nr2f1	Pspc1			Trim37	8.23491	Men1	5.73947	Ctnna1	6.26334	Crim1	7.96899	Siae	6.28879	Trim37	8.33555
B230219D22Rik	Grid1	Dhrs1	Hnrnpa0	Mef2c	Zmym2			Ctnna1	6.16852	Runx1t1	5.37178	Ly6h	3.04799	Pcgf5	3.66754	Cap2	6.9599	Ctnna1	6.20273
Txndc15	Ccser2	Mphosph8	Ubqln1	Hapln1	Xpo4			Ly6h	3.17559	Dhx30	5.84294	Mxi1	6.03136	Atp8a1	9.30927	Rap1a	5.89694	Ly6h	2.83638
H2afy	Ghitm	Pspc1	Hnrnpk	Vcan	Lats2			Mxi1	6.12811	Bap1	6.42149	Eya3	5.08224	Trim37	8.34244	Kalrn	9.64544	Mxi1	6.17101
Smad5	Mapk1ip1l	Xpo4	Ntrk2	Rasgrf2	Rcbtb1			Eya3	5.15192	Slc35a3	4.27832	Ndufa12	5.33973	Ctnna1	6.23628	Zmynd8	6.15	Eya3	5.07913
Spock1	Ttc5	Lats2	Agtpbp1	Msh3	Cdadc1			Ndufa12	5.81999	Btbd6	4.27832	Nnat	8.31835	Ly6h	3.1208	Skiv2l2	5.20394	Ndufa12	4.76103
Hnrnpa0	Ndrg2	Zdhhc20	Ptch1	Homer1	Amer2			Nnat	8.21538	Ddx50	5.33585	Gdf11	5.31469	Mxi1	6.11903	Snx12	5.31382	Nnat	8.18349
Ubqln1	Hnrnpc	Cab39l	Zfp367	Jmy	Mipep			Gdf11	5.27945	Ndufb6	3.86958	Ywhaq	7.53403	Eya3	5.2066	Ppp2r5e	5.89399	Gdf11	5.25316
Hnrnpk	Chd8	Amer2	Habp4	Arsb	Tnfrsf19			Ywhaq	7.70016	Klhdc2	5.21445	Dok4	3.12203	Ndufa12	5.10659	Cpne4	6.19856	Ywhaq	7.82915
Ntrk2	Sall2	Sacs	Nsun2	Lhfpl2	Sacs			Dok4	3.65846	Dld	6.26787	Nrep	5.78246	Nnat	8.18816	Senp5	5.42411	Dok4	3.52055
Agtpbp1	Abhd4	Extl3	Ube2ql1	Scamp1	Spryd7			Nrep	5.58297	Ndufb2	4.1183	Adam17	1.93683	Gdf11	5.11015	Sumo3	6.3631	Nrep	5.64411
Ptch1	Mmp14	Ccdc25	Lpcat1	Ap3b1	Mtmr9			Adam17	1.50857	Higd1a	5.08188	Cpsf6	7.57875	Ywhaq	7.72624	Clip2	5.91157	Adam17	1.10367
Habp4	Lrp10	Scara3	Brd9	Aggf1	Extl3			Cpsf6	7.52087	Neurl1b	6.62726	Elp5	4.91739	Dok4	3.4818	Atp5g3	5.65392	Cpsf6	7.57919
Nsun2	Acin1	Ptk2b	Tppp	Poc5	Elp3			Elp5	5.16427	Zmynd11	7.35707	Usp48	6.98057	Nrep	5.7748	Tshz2	7.90517	Elp5	5.14207
Ube2ql1	Bcl2l2	Stmn4	Pdcd6	Hexb	Ccdc25			Usp48	6.89488	Sp4	5.09913	Bsdc1	5.50103	Adam17	1.97193	Plekhb2	7.51725	Usp48	7.00971
Lpcat1	Pabpn1	Dpysl2	Ccdc127	Enc1	Scara3			Bsdc1	5.64597	Rnf208	3.49257	L1cam	8.39352	Cpsf6	7.6505	Tbca	5.35724	Bsdc1	5.47412
Brd9	Slc22a17	Pnma2	Pcsk1	Btf3	Clu			L1cam	8.42076	Mllt3	5.3611	Amer2	6.04284	Elp5	5.17969	Lbh	5.75154	L1cam	8.25997
Tppp	Jph4	Bnip3l	Ttc37	Fcho2	Stmn4			Amer2	6.1391	Cic	6.45872	Rps8	7.38338	Usp48	7.05478	Htt	7.83318	Amer2	6.02002
Exoc3	Cpne6	Nefl	Nr2f1	Tnpo1	Dpysl2			Rps8	7.50214	Coa5	6.38503	Zfp654	5.02551	Bsdc1	5.56732	Pfkp	7.02058	Rps8	7.4692
Sdha	Ipo4	Nefm	Mef2c	Map1b	Bnip3l			Zfp654	5.06895	Pls3	7.07372	Tubgcp5	4.99431	L1cam	8.34395	Rundc1	4.19083	Zfp654	5.1838
Ccdc127	Tm9sf1	Chmp7	Rasa1	Bdp1	Ppp2r2a			Tubgcp5	4.98441	Pgam1	6.00502	Clk3	4.87091	Amer2	6.06124	Thtpa	2.42737	Tubgcp5	5.0991
Ttc37	Mphosph8	Rhobtb2	Vcan	Pik3r1	Nefl			Clk3	4.96336	Ctbp1	5.78549	Stim2	7.76473	Rps8	7.43777	Ifrd1	5.60792	Clk3	4.68381
Nr2f1	Pspc1	Egr3	Rasgrf2	Srek1	Nefm			Stim2	7.8376	Med24	5.31754	Ctr9	5.66106	Zfp654	5.34924	Ift80	5.27811	Stim2	7.69719
Mblac2	Zmym2	Phyhip	Ankrd34b	Nln	Chmp7			Ctr9	5.40965	Rnf130	7.4558	Sall1	4.87947	Tubgcp5	5.01443	Trim24	5.8521	Ctr9	5.53987
Rasa1	Xpo4	Lgi3	Zfyve16	Rnf180	Rhobtb2			Sall1	4.56266	Oscp1	5.36823	Dstyk	6.23526	Clk3	4.75671	Cdh12	7.81305	Sall1	4.57397
Hapln1	Lats2	Nudt18	Homer1	Htr1a	Egr3			Dstyk	6.26055	Ctdspl	5.05561	Tmed3	4.86661	Stim2	7.59303	Fam78b	4.98333	Dstyk	6.27472
Vcan	Fgf9	Gfra2	Jmy	Zswim6	Phyhip			Tmed3	4.942	Ankra2	5.11618	Fau	6.33979	Ctr9	5.53849	Ndufs4	5.82452	Tmed3	5.03006
Rasgrf2	Rcbtb1	Fndc3a	Arsb	Rab3c	Nudt18			Fau	6.56651	Lrpprc	5.97963	Pgam5	5.07853	Sall1	4.66269	Armcx4	7.96535	Fau	6.50915
Ankrd34b	Cdadc1	Itm2b	Lhfpl2	Gpbp1	Gfra2			Pgam5	5.04577	l7Rn6	4.41548	Ythdf1	5.24019	Dstyk	6.32028	G6pdx	4.61959	Pgam5	4.91763
Zfyve16	Amer2	Sucla2	Scamp1	Il6st	Fndc3a			Pex11b	0.016041	Clip3	7.38635	Bdnf	5.84937	Tmed3	4.82775	Sod2	7.43958	Ythdf1	5.41163
Homer1	Tnfrsf19	Esd	Ap3b1	Snx18	Itm2b			Ythdf1	5.16119	Etf1	6.24867	Ndufa9	5.80735	Fau	6.35977	Luc7l2	7.83702	Bdnf	5.71569
Jmy	Kpna3	Zc3h13	Pde8b	Mocs2	Esd			Bdnf	5.90709	Ankrd11	3.8796	Pou3f2	4.90486	Pgam5	4.95617	Grik1	6.11248	Ndufa9	5.86774
Arsb	Ctsb	Cog3	Aggf1	Emb	Lrch1			Ndufa9	5.82584	Dync2h1	7.03615	Tulp4	8.13115	Ythdf1	5.55951	Zfp275	5.07462	Pou3f2	5.05071
Lhfpl2	Extl3	Tsc22d1	Col4a3bp	Hcn1	Zc3h13			Pou3f2	4.98441	Lysmd2	4.34492	Vwa5a	4.7547	Bdnf	5.65295	Dennd5a	9.09789	Tulp4	8.14319
Scamp1	Fzd3	Serp2	Hmgcr	Nnt	Gpalpp1			Tulp4	8.17475	Ccny	6.63023	Actn1	5.8817	Ndufa9	5.83854	Mbd1	3.99579	Vwa5a	4.58534
Ap3b1	Elp3	Akap11	Enc1	Paip1	Tsc22d1			Vwa5a	4.5533	Rfx7	6.26977	Ppp1r1b	5.62333	Pou3f2	5.21325	Psmb7	5.61151	Actn1	6.00951
Pde8b	Ccdc25	Kbtbd7	Utp15	Hmgcs1	Serp2			Actn1	5.87363	Akap9	6.81254	Cct4	6.02751	Tulp4	8.52953	Ctxn1	6.7657	Ppp1r1b	5.33288
Aggf1	Clu	Wbp4	Ankra2	Rpp14	Kbtbd7			Ppp1r1b	5.46062	Smarca4	6.56653	Ahcyl1	9.15934	Vwa5a	4.80593	Mtf1	5.61867	Cct4	6.22289
Col4a3bp	Stmn4	Pcdh17	Fcho2	Pdhb	Wbp4			Cct4	6.15311	Pou6f1	6.15072	Cers5	5.53394	Actn1	5.9037	Fem1c	5.10551	Ahcyl1	9.14636
Enc1	Dpysl2	Tdrd3	Pik3r1	Fam107a	Sugt1			Ahcyl1	9.14093	Ss18	5.33221	Zfp26	5.60279	Ppp1r1b	5.35527	Tsc22d1	7.73783	Cers5	5.36622
Utp15	Pnma2	Pcdh20	Srek1	Ptprg	Pcdh17			Cers5	5.43536	Ehd3	6.16308	Txnl4a	4.00201	Cct4	6.24927	Lgalsl	6.17933	Zfp26	5.73878
Ankra2	Bnip3l	Klf12	Nln	Fezf2	Tdrd3			Zfp26	5.4556	Vti1a	5.44107	Rhbdd2	6.41388	Ahcyl1	9.22851	Tmem8b	4.83763	Txnl4a	3.49666
Map1b	Ppp2r2a	Lmo7	Sgtb	Cadps	Pcdh20			Txnl4a	3.6051	Ssh2	6.35123	Lrrc8d	6.16695	Cers5	5.51984	Ppm1a	6.53745	Rhbdd2	6.20273
Bdp1	Nefl	Kctd12	Rgs7bp	Synpr	Dach1			Rhbdd2	6.33892	Ntng2	5.01982	Ccdc85c	4.49535	Zfp26	5.58537	Smarcad1	5.81521	Lrrc8d	6.00528
Cdk7	Nefm	Fbxl3	Rnf180	Top2b	Mzt1			Lrrc8d	6.13126	Ttc17	7.23849	Sec24b	6.16169	Txnl4a	3.35526	Pgs1	4.6824	Ccdc85c	4.12974
Slc30a5	Chmp7	Mycbp2	Htr1a	Thrb	Klf12			Ccdc85c	4.74228	Neurl1a	6.7429	Sumo3	6.04665	Rhbdd2	6.25412	Ikbkb	6.04503	Sec24b	6.18976
Pik3r1	Rhobtb2	Ednrb	Kif2a	Nkiras1	Lmo7			Sec24b	6.07676	Pex5l	7.74599	Klf7	5.33973	Lrrc8d	5.98947	Shprh	6.796	Sumo3	5.88394
Srek1	Egr3	Ndfip2	Plk2	Ube2e2	Fbxl3			Sumo3	5.92171	Chmp7	4.96911	Selm	5.00609	Ccdc85c	4.40257	Dgke	6.33079	Klf7	5.7027
Nln	Phyhip	Spry2	Gpbp1	Ppp3cb	Mycbp2			Klf7	5.50256	Ptch1	6.21938	Rrm1	4.01761	Sec24b	5.99912	Elof1	3.59264	Selm	4.92212
Sgtb	Lgi3	Slitrk5	Mier3	Usp54	Ednrb			Selm	5.3622	Ppp1r7	6.57272	Smg7	7.32031	Sumo3	5.98753	Atl2	6.88176	Rrm1	4.35898
Trim23	Nudt18	Gpc5	Il6st	Vcl	Spry2			Rrm1	3.83879	Tgfa	5.9202	Cox7c	7.16611	Klf7	5.52786	Mt1	6.4154	Smg7	7.2906
Rgs7bp	Gfra2	Dzip1	Snx18	Ap3m1	Slitrk5			Smg7	7.2994	Ube2b	5.10768	Arl8a	6.86351	Selm	5.12786	Nf2	5.95462	Cox7c	7.13587
Rnf180	Fndc3a	Dnajc3	Ndufs4	Adk	Gpc5			Cox7c	7.35299	Ar	3.96676	Adcy2	8.01257	Rrm1	4.20326	Ehmt1	5.76127	Arl8a	6.78535
Htr1a	Itm2b	Hs6st3	Mocs2	Samd8	Dzip1			Arl8a	7.01482	Inppl1	4.52165	Trap1	5.61052	Smg7	7.23465	Usp19	5.8027	Adcy2	8.00823
Smim15	Lrch1	Rap2a	Nnt	Vdac2	Dnajc3			Adcy2	8.00617	Vegfb	4.22431	Ubap2	5.85589	Cox7c	7.16605	Men1	6.10994	Trap1	5.61667
Plk2	Zc3h13	Stk24	Paip1	Kcnma1	Hs6st3			Trap1	5.34873	Slc7a10	5.35033	Unc45a	4.18584	Arl8a	6.786	Runx1t1	5.74174	Ubap2	6.02629
Mier3	Cog3	Tm9sf2	Zfp131	Dlg5	Rap2a			Ubap2	5.96824	Map2k4	6.87397	Fbxo38	5.53936	Adcy2	7.95419	Dhx30	6.21281	Unc45a	4.34568
Il6st	Tpt1	Fgf14	Abhd6	Polr3a	Farp1			Unc45a	4.41543	Dnajb2	4.44276	Mrpl17	4.62831	Trap1	5.4568	Bap1	6.79125	Fbxo38	5.63593
Snx18	Tsc22d1	Plcxd3	Rpp14	Rps24	Dock9			Fbxo38	5.53622	Epn2	6.77009	Tenm3	8.9364	Ubap2	5.84712	Slc35a3	4.64784	Mrpl17	4.86263
Ndufs4	Serp2	Ttc33	Pxk	Zmiz1	Tm9sf2			Mrpl17	4.5812	Mphosph10	4.63245	Fnbp1	7.75021	Unc45a	4.22316	Btbd6	4.64784	Tenm3	8.73602
Hmgcs1	Akap11	Rictor	Pdhb	Zcchc24	Pcca			Tenm3	8.95417	Csdc2	6.01869	Bre	4.00201	Fbxo38	5.58537	Ddx50	5.70524	Fnbp1	7.78053
Fam107a	Sugt1	Lifr	Fam107a	Arhgef3	Rpl37			Fnbp1	7.71964	Eif3b	5.81189	Slc39a1	5.81407	Mrpl17	4.59303	Ndufb6	4.23806	Bre	4.05811
Ptprg	Pcdh17	Nipbl	Ptprg	Erc2	Ttc33			Bre	3.86929	Slc25a11	4.46289	Rps29	7.53267	Tenm3	8.7672	Klhdc2	5.58253	Slc39a1	5.85135
Fezf2	Tdrd3	Nadk2	Fezf2	Wnt5a	Lifr			Slc39a1	5.71476	Uqcrb	5.99814	Nova2	7.26746	Fnbp1	7.72042	Dld	6.63595	Rps29	7.45842
Cadps	Pcdh20	Npr3	Cadps	Cacna2d3	Nipbl			Rps29	7.72278	Phf20l1	6.63319	Tanc1	7.51629	Bre	4.09223	Ndufb2	4.48512	Nova2	7.25277
Synpr	Mzt1	Zfr	Synpr	Actr8	Slc1a3			Nova2	7.43937	Ctdspl2	5.38942	Snx16	4.48977	Slc39a1	5.77705	Higd1a	5.44841	Tanc1	7.71282
Atxn7	Klf12	Mtmr12	Psmd6	Cacna1d	Nadk2			Tanc1	7.68148	Lhpp	3.35572	Wwc1	6.87105	Rps29	7.60951	Neurl1b	6.99332	Snx16	4.56251
Psmd6	Fbxl3	Golph3	Slc4a7	Tkt	Lmbrd2			Snx16	4.56731	Zranb2	6.74565	Cyb5d1	4.39739	Nova2	7.34319	Zmynd11	7.72297	Wwc1	6.92276
Slc4a7	Mycbp2	Pdzd2	Top2b	Bap1	Zfr			Wwc1	7.07902	Doc2a	2.0797	Pik3cb	5.40939	Tanc1	7.5828	Sp4	5.46439	Cyb5d1	4.46741
Top2b	Ednrb	Drosha	Thrb	Capn7	Golph3			Cyb5d1	4.19238	Tomm34	4.99699	Gabbr1	10.14	Snx16	4.43137	Rnf208	3.85747	Pik3cb	5.38586
Thrb	Spry2	Cdh6	Nr1d2	Sh3bp5	Pdzd2			Pik3cb	5.35143	Ogdhl	5.4712	Pex5l	8.18482	Wwc1	6.88717	Mllt3	5.72526	Gabbr1	10.0973
Nr1d2	Slitrk1	Basp1	Ube2e2	Ankrd28	Drosha			Gabbr1	10.2259	Fam155a	4.05782	Sod3	4.43853	Cyb5d1	4.30012	Cic	6.82258	Pex5l	8.26925
Ube2e2	Slitrk5	Myo10	Gng2	Parg	Cdh6			Pex5l	8.2139	Nxph3	3.59341	Stxbp6	6.34135	Pik3cb	5.5828	Coa5	6.74786	Sod3	4.43636
Gng2	Gpc5	Zfp622	Ppp3cb	Ogdhl	Cdh12			Sod3	4.48108	Ext1	6.72496	Gpd1	-0.205349	Gabbr1	10.0547	Pls3	7.43655	Stxbp6	6.64165
Ppp3cb	Cldn10	Ank	Usp54	Mapk8	Cdh18			Stxbp6	6.26772	Hprt	4.2085	Tiam1	7.40504	Pex5l	8.20951	Pgam1	6.36735	Tiam1	7.28189
Usp54	Dnajc3	Trio	Vcl	Glud1	Basp1			Tiam1	7.40466	Cryzl1	5.12463	Rab15	7.07492	Sod3	4.085	Ctbp1	6.14753	Rab15	7.0777
Ap3m1	Hs6st3	Cct5	Ap3m1	Bmpr1a	Myo10			Rab15	7.34352	Clpb	5.31754	Mis12	3.81825	Stxbp6	6.37022	Med24	5.6781	Mis12	4.13749
Samd8	Mbnl2	Sema5a	Adk	Grid1	Zfp622			Mis12	4.03986	Gpalpp1	4.84166	Tenm4	9.05407	Tiam1	7.41055	Rnf130	7.81617	Tenm4	8.88547
Kcnma1	Rap2a	Sdc2	Samd8	Ccser2	Ank			Tenm4	8.97184	Chrm2	4.99699	Pde4b	6.41093	Rab15	7.17374	Oscp1	5.72858	Pde4b	6.39103
Dlg5	Nalcn	Tspyl5	Kcnma1	Ghitm	Trio			Pde4b	6.46657	Oat	6.11936	Mrps7	4.2794	Mis12	4.06308	Ctdspl	5.41592	Mrps7	4.33224
Polr3a	Rpl37	Mtdh	Dlg5	Nrg3	Ctnnd2			Mrps7	4.39462	Vps53	5.33221	Nudt4	7.33361	Tenm4	8.86491	Ankra2	5.47625	Nudt4	7.30442
Zmiz1	Ttc33	Kcns2	Polr3a	Txndc16	Tspyl5			Nudt4	7.30778	Pvalb	2.64718	Hspa5	9.24073	Pde4b	6.43422	Lrpprc	6.33948	Hspa5	9.49854
Zcchc24	Lifr	Cox6c	Arhgef3	Fermt2	Mtdh			Hspa5	8.98735	Vcl	5.96559	Cend1	6.03328	Mrps7	4.33712	l7Rn6	4.77497	Cend1	6.15775
Slmap	Nipbl	Ywhaz	Erc2	Cnih1	Cox6c			Cend1	6.28762	Rasgrf2	5.89079	Map9	6.64614	Nudt4	7.47628	Clip3	7.7452	Map9	6.68059
Arf4	Slc1a3	Zfp706	Wnt5a	Samd4	Ankrd46			Map9	6.66866	Cckbr	5.00159	Cct2	6.47589	Hspa5	9.2324	Etf1	6.60746	Cct2	6.55901
Arhgef3	Nadk2	Ubr5	Actr8	Mapk1ip1l	Pabpc1			Cct2	6.55834	Nkiras1	5.08621	Phf20	6.6636	Cend1	6.04829	Ankrd11	4.23806	Phf20	6.66326
Erc2	Lmbrd2	Baalc	Cacna1d	Ktn1	Ywhaz			Phf20	6.66974	Akap5	6.24286	Arhgef2	7.10079	Map9	6.76805	Dync2h1	7.39444	Arhgef2	6.99806
Wnt5a	Npr3	Slc25a32	Sfmbt1	Apex1	Rrm2b			Arhgef2	7.10248	Mtch2	6.17736	Pccb	5.23018	Cct2	6.4526	Lysmd2	4.70274	Pccb	5.35298
Cacna2d3	Zfr	Rims2	Itih3	Ndrg2	Ubr5			Pccb	5.40965	Zfp592	5.31385	Chmp2a	5.12248	Phf20	6.63077	Ccny	6.9878	Chmp2a	5.29876
Actr8	Golph3	Zfpm2	Nek4	Chd8	Klf10			Chmp2a	5.1704	Pnmal1	6.20153	Glg1	9.04553	Arhgef2	7.10837	Rfx7	6.62711	Glg1	9.00563
Tkt	Pdzd2	Oxr1	Spcs1	Tox4	Rims2			Glg1	9.03647	Pmpcb	5.21445	Timm8b	-1.5364	Pccb	5.37911	Akap9	7.16931	Timm8b	-1.14182
Sfmbt1	Drosha	Rspo2	Nisch	Sall2	Lrp12			Ankra2	5.25657	Smad2	4.82101	Ankra2	5.07853	Chmp2a	5.17289	Smarca4	6.92281	Ankra2	5.07913
Pbrm1	Cdh6	Nudcd1	Bap1	Dad1	Oxr1			Slc25a1	4.5007	Senp6	6.92807	Slc25a1	4.27292	Glg1	9.04317	Pou6f1	6.50693	Slc25a1	4.24891
Nisch	Cdh10	Ebag9	Sh3bp5	Abhd4	Rspo2			Cdh2	8.31844	Bin1	6.27168	Cdh2	8.25272	Timm8b	-1.22974	Ss18	5.68834	Cdh2	8.26174
Bap1	Cdh12	Sybu	Ankrd28	Oxa1l	Eny2			Coa5	6.51077	Ubap2	5.48439	Coa5	6.36593	Ankra2	5.0557	Ehd3	6.51845	Coa5	6.70685
Sh3bp5	Basp1	Rad21	Ncoa4	Mmp14	Ebag9			Ubp1	6.44269	Dlgap4	7.17584	Ubp1	6.44738	Slc25a1	4.40257	Vti1a	5.7964	Ubp1	6.35661
Dph3	Myo10	Samd12	Ogdhl	Lrp10	Sybu			Trpm7	3.21174	Necap2	3.38415	Trpm7	3.6179	Cdh2	8.26296	Ssh2	6.70649	Trpm7	3.23317
Ncoa4	Zfp622	Enpp2	Mapk8	Prmt5	Kcnv1			Rnf5	5.08852	Cdh20	6.48357	Rnf5	5.02551	Coa5	6.44838	Ntng2	5.37426	Rnf5	5.02589
Parg	Ank	Taf2	Glud1	Acin1	Trps1			Pld2	4.5533	Cdc16	4.01301	Pld2	4.40334	Ubp1	6.44555	Ttc17	7.59277	Pld2	4.83908
Ogdhl	Trio	Derl1	Bmpr1a	Bcl2l2	Eif3h			Noa1	3.70147	Usp11	6.00731	Noa1	3.38516	Trpm7	3.43706	Neurl1a	7.09686	Noa1	3.58992
Mapk8	Ctnnd2	Fam91a1	Wapl	Pabpn1	Ext1			Upf2	6.17921	Cul3	7.2297	Upf2	6.07861	Rnf5	4.92005	Pex5l	8.0999	Upf2	6.21376
Glud1	Cct5	Tmem65	Grid1	Slc22a17	Taf2			Tns3	8.05881	Mtmr3	5.92988	Tns3	7.96458	Pld2	4.57766	Chmp7	5.32261	Tns3	7.96373
Bmpr1a	Sema5a	Rnf139	Ccser2	Cmtm5	Derl1			Acaa2	3.66716	Scaf4	5.20252	Acaa2	3.2464	Noa1	3.76126	Ptch1	6.57288	Acaa2	3.37093
Wapl	Sdc2	Mtss1	Nrg3	Jph4	Zhx1			Ier5	4.92031	Aip	4.0311	Ier5	4.66839	Upf2	6.25251	Ppp1r7	6.9257	Ier5	4.74591
Grid1	Tspyl5	Trib1	Txndc16	Cpne6	Fam91a1			Snrpd2	3.99907	Pik3r2	5.28399	Snrpd2	4.00201	Tns3	8.00201	Tgfa	6.27301	Snrpd2	4.43006
Ccser2	Mtdh	Asap1	Gpr137c	Tm9sf1	Tmem65			Pbxip1	6.76101	Abr	8.29081	Pbxip1	6.6499	Acaa2	3.64805	Ube2b	5.46041	Pbxip1	6.64572
Nrg3	Laptm4b	Adcy8	Fermt2	Dhrs1	Ndufb9			Paip2b	5.48544	Cnih3	6.13408	Paip2b	5.61309	Ier5	4.66269	Ar	4.31935	Paip2b	5.50438
Txndc16	Matn2	Efr3a	Samd4	Pspc1	Sqle			Kcnj4	5.96471	Usp31	7.20202	Kcnj4	5.97654	Snrpd2	4.25573	Inppl1	4.87397	Kcnj4	5.57736
Fermt2	Kcns2	St3gal1	Mapk1ip1l	Zmym2	Trib1			Sema5a	6.09139	Pde4a	5.8455	Sema5a	6.05801	Pbxip1	6.68319	Vegfb	4.57614	Sema5a	5.92479
Samd4	Vps13b	Khdrbs3	Fbxo34	Gjb6	Adcy8			Setx	7.10488	Odc1	4.74084	Setx	7.16173	Paip2b	5.61579	Slc7a10	5.70187	Setx	7.09569
Mapk1ip1l	Cox6c	Kcnk9	Ktn1	Fgf9	Ndrg1			Rab35	5.59214	Gdap1	6.15897	Rab35	5.66602	Kcnj4	5.88509	Map2k4	7.22546	Rab35	5.79861
Ktn1	Ankrd46	Trappc9	Ttc5	Rcbtb1	St3gal1			Stx16	6.00304	Pkn2	5.95378	Stx16	6.21002	Sema5a	6.0258	Dnajb2	4.79406	Stx16	6.14436
Ttc5	Pabpc1	Slc45a4	Apex1	Amer2	Kcnk9			Fgfrl1	4.73815	Rab15	6.9837	Fgfrl1	4.73124	Setx	7.16004	Epn2	7.121	Fgfrl1	4.52758
Apex1	Ywhaz	Ptp4a3	Chd8	Tnfrsf19	Slc45a4			Sel1l	8.6303	Stk25	6.48357	Sel1l	8.71896	Rab35	5.66754	Mphosph10	4.98333	Sel1l	8.59867
Sall2	Zfp706	Arc	Sall2	Mtmr9	Arc			Calm3	9.75137	Sorbs2	7.88053	Calm3	9.63469	Stx16	6.1208	Csdc2	6.36948	Calm3	9.63334
Dad1	Rrm2b	Ly6h	Dad1	Extl3	Ly6h			Kbtbd4	4.00595	Ubl5	4.78948	Kbtbd4	4.24668	Fgfrl1	4.58793	Eif3b	6.16229	Kbtbd4	4.04993
Oxa1l	Ubr5	Plec	Abhd4	Fzd3	Nrbp2			B230219D22Rik	6.95832	Xrn1	6.13826	B230219D22Rik	7.03332	Sel1l	8.53285	Slc25a11	4.81289	B230219D22Rik	7.19829
Mmp14	Atp6v1c1	Gpaa1	Mmp14	Elp3	Plec			Frzb	5.0755	Ggps1	4.15175	Frzb	5.14751	Calm3	9.6969	Uqcrb	6.34811	Frzb	5.17254
Lrp10	Rims2	Scrt1	Acin1	Scara3	Oplah			Cttnbp2nl	5.58066	Mfsd1	6.57888	Cttnbp2nl	5.47583	Kbtbd4	4.27492	Phf20l1	6.98226	Cttnbp2nl	5.47106
Prmt5	Lrp12	Cpsf1	Slc7a8	Clu	Gpaa1			Unc13c	6.43252	Sesn1	4.59037	Unc13c	6.53535	B230219D22Rik	7.02202	Ctdspl2	5.73846	Unc13c	6.24097
Acin1	Zfpm2	Zfp251	Bcl2l2	Ptk2b	Cyc1			Efnb2	5.53622	Eps15l1	4.92142	Efnb2	5.79609	Frzb	5.0068	Lhpp	3.70447	Efnb2	5.57736
Slc7a8	Oxr1	Myh9	Pabpn1	Stmn4	Bop1			Acsl5	5.94516	Zfp239	3.80796	Acsl5	6.05612	Cttnbp2nl	5.29387	Zranb2	7.0943	Acsl5	5.81077
Pabpn1	Eny2	Eif3d	Slc22a17	Dpysl2	Scrt1			Tmem255a	5.73146	Tpm4	4.4893	Tmem255a	5.74077	Unc13c	6.50637	Doc2a	2.42737	Tmem255a	5.84664
Slc22a17	Nudcd1	Cacng2	Cmtm5	Pnma2	Cpsf1			Fasn	8.32637	Rpl37	6.48849	Fasn	8.21516	Efnb2	5.67719	Tomm34	5.34436	Fasn	8.25864
Thtpa	Ebag9	Kctd17	Thtpa	Bnip3l	Vps28			Aco1	5.1457	Eif2a	5.31754	Aco1	5.21334	Acsl5	5.6963	Ogdhl	5.81832	Aco1	5.25672
Jph4	Sybu	Sstr3	Jph4	Ppp2r2a	Kifc2			Nat14	5.31312	Ccng2	5.07318	Nat14	5.52578	Tmem255a	5.76805	Fam155a	4.40461	Nat14	5.29184
Cpne6	Kcnv1	Elfn2	Cpne6	Nefl	Zfp251			Gapvd1	6.86019	Bod1l	7.11777	Gapvd1	6.78022	Fasn	8.27095	Nxph3	3.93976	Gapvd1	6.85862
Dcaf11	Trps1	H1f0	Ipo4	Rhobtb2	Rpl8			Arpc1a	6.7061	Inpp4a	6.85124	Arpc1a	6.51901	Aco1	5.25895	Ext1	7.07101	Arpc1a	6.67528
Ipo4	Eif3h	Sox10	Tm9sf1	Egr3	Txn2			Bckdhb	4.45618	Rb1cc1	7.35168	Bckdhb	4.43853	Nat14	5.26855	Hprt	4.55392	Bckdhb	4.47964
Tm9sf1	Ext1	Tmem184b	Nedd8	Phyhip	Eif3d			Dstn	6.81194	Slc35e1	7.74941	Dstn	6.65987	Gapvd1	6.8245	Cryzl1	5.46835	Dstn	6.77546
[truncated: 4,860 more rows]

## Sheet: Table D
S4.The information of MISA mRNA
[truncated: 1,239 more rows]

[truncated: 1 more sheets: Table E]
